# Supplementary material for: G4-DNA formation and chromatin remodelling are interdependent in human cells
Source: Chem Sci. 2023 Jun 27;14(28):7681–7. doi: 10.1039/d3sc02533k (PMC10355101; doi:10.1039/d3sc02533k)
Supplement: SC-014-D3SC02533K-s002 [file SC-014-D3SC02533K-s002.xlsx]

## Sheet: GQC-05
Peak (chr_start_end)	logFC	logCPM	F	PValue	FDR
chr7_45291576_45291706	13.4368	10.2117	649.308	6.28262e-09	0.000209632
chr3_160665441_160665571	9.36112	6.19949	536.014	1.33745e-08	0.000223133
chr8_46852749_46852952	9.93696	6.75111	224.735	3.98618e-07	0.00443356
chr2_91818686_91819028	-7.93639	4.88228	192.567	7.23159e-07	0.00603241
chr3_64637137_64637740	-7.65212	4.63508	92.4578	1.15956e-05	0.0773818
chr8_109594757_109595034	-0.974548	6.00807	31.2167	0.000164686	0.651813
chr9_85781283_85781869	-0.932883	5.40593	29.9938	0.000194365	0.651813
chr8_129254294_129254802	-7.33996	4.36792	39.8344	0.00023277	0.651813
chr10_39148962_39149232	3.61466	5.97455	25.3853	0.000381403	0.651813
chrY_13489079_13489873	0.862463	6.14289	24.2554	0.0004561	0.651813
chr7_83176774_83177451	-0.844875	5.90477	23.3075	0.000532431	0.651813
chr9_120162357_120163282	-0.801414	5.73362	22.7121	0.000588138	0.651813
chrY_13448655_13448916	1.10125	7.22478	22.681	0.000591235	0.651813
chrUn_gl000224_3781_3942	8.89127	5.71123	30.0638	0.000591253	0.651813
chr16_30441166_30441870	0.897661	5.34237	22.3805	0.000622149	0.651813
chr10_42393026_42393433	10.7245	7.51602	29.2973	0.000642605	0.651813
chrUn_gl000214_65556_65701	8.48627	5.33058	28.941	0.000668381	0.651813
chr10_86373074_86373740	-0.757724	5.45508	21.9279	0.000672412	0.651813
chrY_13866953_13867081	9.30052	6.11557	28.7173	0.000685221	0.651813
chrUn_gl000226_11810_11951	10.5713	7.36517	28.201	0.00072617	0.651813
chr10_24841311_24841571	-0.94009	5.0636	21.4006	0.000737158	0.651813
chr17_22245422_22245686	8.38643	5.24064	27.9584	0.000746471	0.651813
chr10_42366264_42366448	9.44142	6.25504	27.9306	0.000748839	0.651813
chr3_61921952_61922482	-0.713402	6.4736	21.121	0.000774478	0.651813
chr2_92313816_92314030	9.87321	6.6787	27.518	0.000785165	0.651813
chr4_49652453_49652743	3.56592	6.28601	21.0001	0.000791306	0.651813
chr17_22252151_22252285	9.98945	6.79298	27.2827	0.000806873	0.651813
chr17_41381659_41382462	0.891053	5.47216	20.8139	0.000818085	0.651813
chr7_100550682_100551219	0.986471	7.53543	20.6169	0.000847577	0.651813
chr12_83028308_83029255	-0.870443	5.35698	20.6053	0.000849357	0.651813
chr16_35279610_35279771	7.16309	4.21009	26.8378	0.00085001	0.651813
chr4_137250366_137250729	-7.13059	4.19677	26.8331	0.000850479	0.651813
chr8_46849757_46849912	8.71715	5.55326	26.545	0.000879978	0.651813
chr16_33887630_33887944	1.22718	7.40178	20.1216	0.000927505	0.651813
chr2_158682289_158682913	-0.761449	5.49174	19.8815	0.000969453	0.651813
chr8_46839822_46840053	8.07194	4.96984	25.6222	0.000983526	0.651813
chr3_64195462_64196289	-0.730127	7.49477	19.7643	0.000990752	0.651813
chr16_46424933_46425223	9.04024	5.86605	25.4827	0.00100047	0.651813
chr21_10809189_10809377	7.99974	4.90897	25.4583	0.00100348	0.651813
chr8_82753975_82755133	0.844534	6.62733	19.6927	0.00100403	0.651813
chr1_207178282_207178603	-7.099	4.1695	24.9726	0.00106566	0.651813
chr6_144537030_144537976	-0.71707	5.97571	19.2853	0.00108372	0.651813
chr8_46855340_46855482	8.54692	5.39522	24.8179	0.00108649	0.651813
chr20_13242631_13243145	-0.800395	5.43962	19.0925	0.00112404	0.651813
chr1_91852792_91853102	0.975598	7.35638	19.0023	0.00114353	0.651813
chr10_42408195_42408357	9.93126	6.73725	24.3344	0.00115492	0.651813
chrY_13811058_13811220	8.38741	5.24888	24.1453	0.00118316	0.651813
chr6_8590637_8590880	-7.06216	4.14122	24.1346	0.00118477	0.651813
chr8_70602342_70602610	1.09309	6.90108	18.8163	0.00118496	0.651813
chr16_46433931_46434586	8.63176	5.47676	24.081	0.00119294	0.651813
chr8_46844128_46844447	8.81314	5.64626	24.0358	0.00119989	0.651813
chr1_81719926_81720472	-7.0652	4.14037	23.8803	0.00122419	0.651813
chr4_49100201_49100858	0.998511	7.10432	18.5593	0.00124517	0.651813
chrUn_gl000226_5015_5486	10.6226	7.41949	23.7367	0.00124715	0.651813
chrUn_gl000216_62724_62937	7.7648	4.71332	23.5529	0.00127736	0.651813
chr7_142333948_142334399	-7.05152	4.13046	23.5385	0.00127977	0.651813
chr2_134192768_134193178	-0.703406	5.39386	18.294	0.00131117	0.651813
chr10_42661313_42661548	7.63288	4.60292	23.3426	0.00131306	0.651813
chr2_205124927_205125282	-7.04365	4.12372	23.1839	0.00134081	0.651813
chrUn_gl000224_4060_4521	8.78114	5.64547	23.1445	0.00134782	0.651813
chrY_13842631_13842841	1.47817	7.59041	18.1201	0.00135669	0.651813
chr15_101142109_101143352	-0.646786	6.04348	17.9485	0.00140346	0.651813
chrX_61685122_61685338	8.78321	5.62134	22.7605	0.00141858	0.651813
chr6_127836729_127838109	-0.788872	5.46136	17.8794	0.00142283	0.651813
chr2_57947881_57948473	-0.711212	5.48392	17.8571	0.00142912	0.651813
chrY_13868219_13868729	1.67817	7.11892	17.8155	0.001441	0.651813
chr17_59898445_59898661	-7.74368	4.70582	22.2872	0.00151231	0.651813
chr16_46435102_46435542	1.97402	6.75006	17.4637	0.00154625	0.651813
chr16_21768364_21768777	1.00244	5.04008	17.4637	0.00154625	0.651813
chr4_49104352_49104900	1.21925	7.43771	17.4355	0.00155507	0.651813
chr2_206544565_206545073	-0.760634	5.56364	17.2633	0.0016103	0.651813
chr6_80320349_80320611	-7.01349	4.09962	21.7301	0.00163281	0.651813
chr8_104800981_104801829	-0.716722	5.37546	16.9723	0.00170895	0.651813
chr2_60869166_60869878	-6.99355	4.08632	21.3639	0.00171861	0.651813
chr5_118323638_118324672	-0.559987	6.16972	16.939	0.0017207	0.651813
chr3_64476923_64477582	-7.69705	4.6675	21.3122	0.00173117	0.651813
chr10_39107189_39107403	1.44577	6.96123	16.908	0.00173171	0.651813
chr4_49139048_49139390	1.33837	7.8523	16.9023	0.00173376	0.651813
chr3_167210962_167211357	-0.775787	5.87692	16.8871	0.00173918	0.651813
chrUn_gl000235_296_1068	0.906646	5.7688	16.837	0.00175725	0.651813
chr3_75718064_75718776	0.900883	6.12504	16.7922	0.00177363	0.651813
chr4_165638032_165638517	-6.98883	4.08159	20.9261	0.00182876	0.651813
chrUn_gl000216_6844_6997	8.44286	5.33372	20.9039	0.00183457	0.651813
chr4_49659356_49659867	1.30276	8.05769	16.3615	0.00194037	0.651813
chr8_111072452_111073182	-0.534596	6.81529	16.3491	0.00194545	0.651813
chr8_89872365_89873018	-0.625656	5.91312	16.3318	0.00195257	0.651813
chr6_64283166_64283787	6.95978	4.04602	20.3986	0.00197346	0.651813
chr6_116433060_116433438	-6.99411	4.08062	20.3951	0.00197447	0.651813
chr7_89348275_89348640	-0.890027	5.82968	16.1724	0.00201945	0.651813
chr20_62273215_62273727	0.790559	5.29525	16.105	0.00204854	0.651813
chr4_56194326_56194452	8.48035	5.40357	20.0639	0.00207278	0.651813
chr5_136410931_136411317	-0.653612	6.14899	16.0095	0.00209061	0.651813
chr7_143824923_143825145	-0.584978	5.64907	16.4289	0.00212688	0.651813
chr8_43822297_43822549	9.44326	6.27622	19.7008	0.0021877	0.651813
chr10_17390454_17391100	-0.59281	5.85452	15.7472	0.00221161	0.651813
chr17_67390652_67391260	-0.629697	5.6455	15.5927	0.00228675	0.651813
chr16_33241052_33241193	7.54192	4.52934	19.1071	0.00239338	0.651813
chrY_13485188_13485749	0.800424	7.76654	15.3583	0.00240665	0.651813
chr4_49149289_49149529	1.33429	8.03625	15.3364	0.0024182	0.651813
chr9_79186660_79186876	1.79965	5.02049	15.3031	0.00243596	0.651813
chr1_197191363_197191980	-0.772465	5.614	15.2623	0.00245787	0.651813
chr6_10521293_10521994	-0.885051	5.19755	15.1935	0.00249537	0.651813
chr7_89699644_89699904	-0.72851	5.599	15.1675	0.00250974	0.651813
chr4_49151172_49152025	1.21101	8.8369	15.1531	0.00251774	0.651813
chrY_58980470_58980779	0.972685	7.05888	15.1104	0.00254161	0.651813
chr2_18011711_18012355	-0.689746	6.35746	15.057	0.00257187	0.651813
chr1_177225392_177225962	-0.581013	6.312	14.9498	0.00263388	0.651813
chr7_134331116_134331948	-0.580776	6.89513	14.9409	0.0026391	0.651813
chrX_61689830_61690104	9.03521	5.88935	18.2879	0.00271864	0.651813
chr4_49639586_49639855	1.31337	7.3265	14.7551	0.00275113	0.651813
chr8_122273201_122273651	-0.644061	5.50188	14.7355	0.00276328	0.651813
chr2_89853078_89853436	1.46236	8.03299	14.6313	0.00282892	0.651813
chr22_18878443_18878653	7.65727	4.63036	18.0371	0.00282919	0.651813
chr10_42360555_42361001	1.21391	8.66898	14.621	0.00283546	0.651813
chrUn_gl000225_25242_25992	0.781914	7.58047	14.6097	0.00284275	0.651813
chrUn_gl000216_75511_76171	1.71703	7.37299	14.5872	0.00285721	0.651813
chr5_2780352_2781057	-0.588862	5.67515	14.586	0.00285798	0.651813
chr3_164924473_164925076	-0.612244	6.0469	14.5662	0.00287086	0.651813
chr19_42721857_42722200	6.87198	3.97418	17.9384	0.00287426	0.651813
chr1_176849886_176850527	-0.676535	5.60054	14.5541	0.00287872	0.651813
chr3_156806421_156807292	-0.621278	6.32204	14.4666	0.00293646	0.651813
chr3_18336536_18337295	-0.693887	5.72792	14.4422	0.00295281	0.651813
chr11_1212828_1212990	6.86307	3.9684	17.7153	0.0029794	0.651813
chr7_127087458_127087708	-6.91724	4.01731	17.6854	0.00299388	0.651813
chr4_49156408_49156997	1.17906	7.88231	14.3459	0.00301831	0.651813
chr9_gl000199_random_145265_145444	4.08673	6.14778	14.3155	0.0030394	0.651813
chr6_71377304_71378302	-0.834102	5.5064	14.2441	0.00308954	0.651813
chr20_52784449_52784830	-7.37014	4.39572	17.4879	0.00309162	0.651813
chr8_104762250_104762395	7.27798	4.31047	17.3172	0.00317939	0.651813
chr5_21485606_21486142	-3.06009	5.49621	14.1184	0.00318021	0.651813
chr21_10819359_10820103	1.56219	7.4404	14.0269	0.00324823	0.651813
chr2_89878933_89879379	1.12614	7.88559	14.0215	0.00325227	0.651813
chr10_42799572_42799774	7.284	4.31483	17.1301	0.00327917	0.651813
chr10_39079216_39079711	1.46102	6.49417	13.9204	0.00332956	0.651813
chr2_163589567_163590035	-0.665924	5.31009	13.8893	0.00335375	0.651813
chr3_40823717_40823952	-6.84665	3.96727	16.9699	0.00336776	0.651813
chr7_83730249_83730438	-0.769731	5.35366	13.8248	0.00340459	0.651813
chr1_110976363_110976741	-6.84294	3.96689	16.8767	0.00342066	0.651813
chr2_209346964_209347716	-0.655494	5.59107	13.7218	0.00348775	0.651813
chrUn_gl000216_1207_1877	1.39368	7.63108	13.7177	0.00349115	0.651813
chr8_115597969_115599126	-0.857273	5.25335	13.7031	0.00350315	0.651813
chr17_25267725_25267929	1.02784	7.21292	13.6647	0.0035349	0.651813
chr2_162137560_162138463	0.785003	5.89964	13.5515	0.00363065	0.651813
chr1_116257168_116257815	-0.491999	6.13027	13.5191	0.00365853	0.651813
chr12_127650474_127650650	1.81578	5.13028	13.5052	0.00367062	0.651813
chr10_42388287_42388544	1.76462	9.27283	13.5033	0.00367228	0.651813
chrUn_gl000225_67830_68038	-7.89274	4.87873	16.351	0.00373949	0.651813
chr13_21872120_21872976	0.94025	5.20447	13.3717	0.00378904	0.651813
chr1_186886002_186886666	-0.678536	5.43397	13.3533	0.00380566	0.651813
chr1_67841952_67842602	-0.725606	5.14855	13.3531	0.00380584	0.651813
chr5_165057154_165057659	-0.714107	5.10606	13.2459	0.00390471	0.651813
chrUn_gl000225_125131_125327	0.897489	7.00384	13.2236	0.0039257	0.651813
chrX_58561252_58561614	1.51994	7.1949	13.2099	0.00393865	0.651813
chr5_110796965_110797394	-0.735747	5.39843	13.1949	0.00395287	0.651813
chr20_47443750_47445141	0.617008	6.32601	13.1881	0.00395931	0.651813
chr2_89875099_89875418	1.20385	9.12086	13.1504	0.0039954	0.651813
chr4_49110259_49110688	0.967487	7.82476	13.1471	0.00399856	0.651813
chr12_56709565_56710285	0.658598	5.25314	13.7215	0.0040312	0.651813
chr9_106551898_106552386	-0.826634	5.01162	13.0601	0.00408344	0.651813
chr2_15043837_15044328	-0.659403	5.66293	12.903	0.00424212	0.651813
chrUn_gl000225_130245_130723	0.688287	7.25526	12.8849	0.00426091	0.651813
chr18_44126251_44126589	1.2269	5.82201	12.8347	0.00431345	0.651813
chr9_79521007_79521555	-0.664001	5.46256	12.8135	0.00433583	0.651813
chr7_16604466_16604829	-6.77611	3.91466	15.4917	0.00434534	0.651813
chr16_70414577_70415773	0.740402	5.12565	12.7776	0.00437414	0.651813
chrUn_gl000225_33325_33924	0.6813	7.56622	12.7622	0.00439072	0.651813
chr12_99392426_99392943	-6.78644	3.92296	15.385	0.00442892	0.651813
chr5_107717046_107718476	-0.532443	6.052	12.7128	0.00444421	0.651813
chr4_49641001_49641490	1.07819	7.33903	12.6943	0.00446447	0.651813
chr7_90032488_90033433	-0.599603	6.42103	12.6923	0.00446668	0.651813
chr3_186648780_186649497	-6.78382	3.91847	15.3314	0.00447171	0.651813
chr5_151586872_151587420	-6.78049	3.91405	15.319	0.00448163	0.651813
chr4_49112442_49112903	1.23894	7.81094	12.6225	0.00454416	0.651813
chr2_50545404_50545665	-7.20837	4.2655	15.232	0.00455233	0.651813
chr3_62016690_62017265	-7.21572	4.26857	15.1939	0.00458373	0.651813
chr17_41465694_41466798	0.79568	6.46763	12.5075	0.00467535	0.651813
chr7_117633487_117633945	-0.785674	5.53392	12.4746	0.00471375	0.651813
chr10_42396616_42396976	1.45649	9.36159	12.3885	0.00481582	0.651813
chr3_174691210_174691773	-0.539924	6.00603	12.3857	0.00481918	0.651813
chrUn_gl000216_145046_145519	0.745566	8.08883	12.3713	0.00483662	0.651813
chrX_15434840_15435018	-6.75736	3.89539	14.8676	0.00486414	0.651813
chr14_21776486_21777419	0.611691	5.65862	12.3245	0.00489349	0.651813
chrX_124780324_124780679	-6.74068	3.88564	14.7707	0.00495153	0.651813
chrUn_gl000225_74479_74903	0.938058	7.79598	12.2689	0.00496214	0.651813
chr9_38069275_38070007	-0.716858	5.03305	12.2514	0.00498404	0.651813
chr3_190529534_190530076	-6.74079	3.88588	14.7009	0.00501572	0.651813
chr16_89766566_89766898	0.613008	5.52408	12.226	0.00501588	0.651813
chr3_154842627_154843321	-0.915221	5.91706	12.2079	0.00503875	0.651813
chr8_119560640_119561388	-0.91863	5.50649	12.2041	0.00504367	0.651813
chr6_141398815_141399172	-1.47043	5.40501	12.2009	0.00504768	0.651813
chr16_88567545_88567984	1.49936	5.40901	12.1497	0.00511322	0.651813
chr8_144751636_144751785	7.24844	4.27909	14.591	0.00511883	0.651813
chr2_186493762_186494256	-6.74817	3.88608	14.5651	0.00514352	0.651813
chr3_64249755_64250784	-0.51857	7.04374	12.1155	0.00515757	0.651813
chr17_41399754_41401188	0.844555	5.67442	12.0647	0.00522433	0.651813
chr8_112112861_112113624	-0.482623	6.29053	12.0641	0.00522513	0.651813
chr14_64970168_64970873	0.607952	5.72064	12.0542	0.00523822	0.651813
chr7_133538450_133539004	-0.619623	5.45007	12.0498	0.0052441	0.651813
chrUn_gl000216_163220_163735	0.808172	8.90888	12.0127	0.00529369	0.651813
chr3_145453321_145453811	-6.72371	3.87357	14.3748	0.00532966	0.651813
chr5_125704202_125704599	-0.856924	4.90364	11.8995	0.00544854	0.651813
chr4_49146362_49146871	1.30949	7.54607	11.8437	0.00552682	0.651813
chr8_128323815_128324431	-0.581447	6.46883	11.8342	0.00554038	0.651813
chr5_99852871_99853333	-0.568944	5.60275	11.8341	0.00554046	0.651813
chr3_64582598_64582916	-7.1554	4.21817	14.1558	0.00555451	0.651813
chr10_39108591_39108875	1.60757	5.60317	11.7155	0.00571195	0.651813
chr2_74756359_74757181	0.71959	5.00886	11.6725	0.0057757	0.651813
chr18_31702604_31702976	-6.69684	3.8517	13.9501	0.00577657	0.651813
chr6_2245360_2246363	-0.530558	5.6956	11.6379	0.00582756	0.651813
chr7_112089999_112091367	-0.756658	6.43847	11.6378	0.00582761	0.651813
chr8_61631506_61631747	-6.69272	3.84978	13.8904	0.00584313	0.651813
chr12_66695808_66696616	-0.510449	6.55494	11.6272	0.00584364	0.651813
chr3_62117277_62117547	-7.11013	4.18467	13.8657	0.00587094	0.651813
chr3_64619010_64619532	-7.12064	4.19079	13.8281	0.00591357	0.651813
chr8_128508620_128509260	-0.727598	6.08443	11.5813	0.00591364	0.651813
chr12_101387741_101387973	-6.71466	3.85849	13.7635	0.00598776	0.651813
chr14_51561640_51562291	-0.48604	6.85753	11.5233	0.00600331	0.651813
chr1_65774968_65775905	-0.767719	5.00539	11.5052	0.00603173	0.651813
chr3_34148225_34148587	-6.69181	3.85412	13.7177	0.00604113	0.651813
chr2_89872069_89872544	1.13296	8.64049	11.4615	0.00610078	0.651813
chr3_178865063_178867135	-1.05211	4.98246	11.4385	0.00613753	0.651813
chr16_46432251_46433207	1.60796	7.32865	11.4255	0.00615839	0.651813
chr17_41463593_41463868	7.04478	4.12117	13.5883	0.00619501	0.651813
chr17_25264385_25265510	0.836234	7.32404	11.3783	0.00623508	0.651813
chr12_20704364_20704503	2.10646	5.95771	11.3413	0.00629576	0.651813
chr1_75198442_75199691	-1.04599	5.6037	11.3125	0.00634369	0.651813
chr6_164426462_164426805	-6.66787	3.82978	13.4516	0.00636295	0.651813
chr5_115010175_115010868	-0.713992	5.69383	11.2822	0.00639441	0.651813
chr9_gl000199_random_164402_164545	3.24452	5.52278	11.2582	0.00643491	0.651813
chr4_140374308_140375510	-0.606244	5.56145	11.2506	0.00644788	0.651813
chr6_114429374_114430024	-0.723276	5.05647	11.234	0.00647611	0.651813
chrUn_gl000212_40516_41251	1.44044	6.47225	11.2335	0.00647707	0.651813
chr5_110427847_110428564	-0.590315	5.46229	11.2031	0.00652913	0.651813
chr20_46205268_46205868	0.604914	6.72928	11.172	0.00658312	0.651813
chr3_6811306_6811810	-6.65872	3.81924	13.2546	0.00661517	0.651813
chr6_163148397_163149220	-0.480482	6.30016	11.1393	0.00664035	0.651813
chr3_170028028_170028356	-0.632859	5.32193	11.0962	0.00671693	0.651813
chr7_76588869_76589392	0.638913	5.26626	11.349	0.00674866	0.651813
chr1_232346982_232347272	-6.63976	3.8091	13.1033	0.00681744	0.651813
chr4_147442748_147444129	-0.5255	5.71255	15.0329	0.00685649	0.651813
chr3_73159861_73160276	0.623991	6.08683	11.0021	0.00688731	0.651813
chr6_12011274_12012124	-0.575308	5.59503	10.9806	0.00692711	0.651813
chr14_93644509_93644832	6.61668	3.77571	13.0156	0.00693822	0.651813
chr3_23136517_23136892	-0.546364	5.62468	10.9476	0.00698854	0.651813
chr1_116314325_116314791	-0.571427	5.64829	10.9449	0.00699344	0.651813
chr2_205042588_205043114	-6.62898	3.80185	12.9717	0.00699983	0.651813
chr1_165580159_165580433	-6.64537	3.80688	12.9416	0.0070423	0.651813
chr8_112248468_112248992	-0.528636	6.39211	10.9001	0.0070781	0.651813
chr8_67140926_67141394	-6.62523	3.7992	12.9151	0.00708012	0.651813
chrY_13817781_13817975	2.68732	5.29032	10.8978	0.00708235	0.651813
chrY_13650551_13651392	1.03213	6.47823	10.8844	0.00710792	0.651813
chr1_196960818_196961746	-0.576753	6.79705	10.8768	0.00712237	0.651813
chr2_141343975_141344372	-0.549116	5.77679	11.2026	0.00713069	0.651813
chr7_131935775_131936596	-0.604855	5.43627	10.8497	0.00717452	0.651813
chr10_42380108_42380461	1.10692	9.65481	10.8154	0.0072411	0.651813
chr5_89854205_89854978	-0.524959	7.38935	10.7967	0.00727777	0.651813
chr1_158057183_158057473	-0.548492	5.53194	11.2293	0.00729344	0.651813
chrUn_gl000219_50836_51297	1.67392	6.05797	10.7819	0.00730695	0.651813
chr20_57227191_57227420	6.97604	4.06739	12.7584	0.00730853	0.651813
chr3_24955619_24956010	-6.62331	3.79381	12.717	0.00737039	0.651813
chr13_73632712_73633823	-0.898173	5.42223	10.7389	0.00739238	0.651813
chr1_241682433_241683336	-0.555935	6.58921	10.733	0.00740412	0.651813
chr7_111495332_111495753	-0.607078	5.37247	10.7103	0.00744979	0.651813
chr1_216293034_216293395	-0.595627	5.52391	11.3044	0.00747453	0.651813
chr6_73232467_73232849	-6.61412	3.78876	12.6444	0.00748053	0.651813
chr5_14011249_14012089	-0.535048	5.9788	10.6833	0.00750453	0.651813
chr1_207925020_207926059	-0.547502	5.44386	10.6659	0.00754016	0.651813
chr2_230138385_230138744	-0.547164	5.79265	10.6657	0.00754046	0.651813
chr12_84264750_84265491	-0.511038	5.68538	11.3103	0.0075611	0.651813
chr6_123065092_123065999	-0.661366	5.11989	10.6452	0.00758264	0.651813
chr5_167150035_167150747	-0.72681	5.49437	10.6386	0.0075963	0.651813
chrUn_gl000225_110287_110856	0.64849	7.68122	10.6113	0.00765298	0.651813
chr1_116854475_116855273	-0.513028	5.81097	10.6095	0.00765667	0.651813
chr9_112163639_112164159	-0.773004	5.04812	10.5737	0.00773195	0.651813
chr1_244614950_244615648	-0.488482	6.54836	10.5713	0.00773694	0.651813
chr2_20412909_20413226	-6.58449	3.76892	12.4783	0.00774039	0.651813
chrY_13482026_13482328	0.863383	7.12725	10.5679	0.00774422	0.651813
chr8_128219005_128219545	-0.724519	5.32171	10.5656	0.00774897	0.651813
chr16_2255415_2255855	6.55776	3.73236	12.4693	0.00775471	0.651813
chr1_176918084_176918735	-0.539585	6.19958	10.5587	0.00776361	0.651813
chr11_18137115_18137501	-6.59373	3.77065	12.4457	0.0077926	0.651813
chr2_92269061_92269799	1.49877	7.28417	10.545	0.00779264	0.651813
chr2_89852127_89852436	1.11194	6.69437	10.5176	0.0078513	0.651813
chr7_143434219_143434763	-6.59795	3.77465	12.4058	0.00785727	0.651813
chrUn_gl000229_6767_7033	-7.13457	4.19108	12.3491	0.00795025	0.651813
chr8_139114971_139115348	-0.556657	5.57357	10.4415	0.00801695	0.651813
chr1_181392534_181392951	-0.501528	5.97332	11.1977	0.00804741	0.651813
chr8_134309266_134310311	-0.48446	6.00263	10.3784	0.00815753	0.651813
chr20_56040065_56040335	-2.75237	5.16372	10.3065	0.00832113	0.651813
chr19_639520_639872	6.54056	3.71427	12.1133	0.00835239	0.651813
chr8_58767760_58768325	-6.5516	3.74123	12.1087	0.00836043	0.651813
chr2_180305336_180305708	-6.5803	3.75671	12.0795	0.00841212	0.651813
chr10_42389156_42389582	1.4544	9.31731	10.2291	0.00850171	0.651813
chr20_52923730_52924081	-6.96542	4.06814	12.0211	0.00851652	0.651813
chr8_43096432_43097065	1.03091	9.21996	10.2224	0.00851755	0.651813
chr5_49405701_49405943	2.80651	5.00742	10.205	0.00855895	0.651813
chr2_212022676_212023026	-6.9684	4.06934	11.9907	0.00857152	0.651813
chrY_13859839_13860193	1.23528	7.07965	10.182	0.00861393	0.651813
chr7_21985106_21986006	-0.495106	5.71945	11.1947	0.00865618	0.651813
chr11_26003652_26003978	-6.53712	3.72777	11.8905	0.00875609	0.651813
chr7_36235456_36235995	-6.53633	3.73158	11.8745	0.00878598	0.651813
chr7_143408840_143409786	-0.722278	5.04214	10.1008	0.00881167	0.651813
chr12_70058755_70059143	-0.577111	5.57598	10.0937	0.00882906	0.651813
chr8_107589803_107590237	-0.63566	5.49802	10.0865	0.0088469	0.651813
chr18_23965851_23966324	-6.52909	3.72497	11.8196	0.00888969	0.651813
chr10_42391437_42391881	1.48342	8.7534	10.0372	0.00897025	0.651813
chr11_15671442_15672251	-0.58535	5.41611	10.0343	0.0089775	0.651813
chr15_92820975_92821421	-6.5215	3.71734	11.763	0.00899801	0.651813
chrY_13833006_13833385	2.07962	6.60794	10.0211	0.00901082	0.651813
chr5_111828125_111828341	-6.96151	4.06831	11.7563	0.00901107	0.651813
chr17_60500862_60501784	0.41929	6.09988	10.0031	0.00905659	0.651813
chr7_76090863_76091276	0.605707	5.36634	10.0004	0.00906348	0.651813
chr9_112642695_112643088	-0.682159	5.14859	9.98883	0.00909299	0.651813
chr7_51443948_51444545	-0.65845	5.93673	9.95158	0.00918896	0.651813
chr21_10795701_10795883	2.57575	5.56424	9.94249	0.00921256	0.651813
chrY_13659218_13659377	2.20627	6.07991	9.9387	0.00922243	0.651813
chr11_80094703_80095148	-6.50112	3.70559	11.5917	0.00933665	0.651813
chr12_83655814_83656229	-6.9281	4.03779	11.5501	0.00942122	0.651813
chr14_23476009_23476556	0.610801	5.36843	9.86243	0.00942363	0.651813
chr5_35617660_35618438	-0.48934	5.81749	10.9947	0.00952147	0.651813
chr2_16152699_16153283	-0.655238	5.22308	9.8136	0.0095552	0.651813
chr4_146018951_146020124	-0.849998	5.52331	9.80852	0.00956899	0.651813
chr11_113845575_113846091	-6.51036	3.70512	11.477	0.00957246	0.651813
chr6_291606_292879	-0.567519	5.51911	12.5373	0.00959863	0.651813
chr3_25074993_25075564	-0.599674	5.43106	11.1997	0.00960176	0.651813
chr17_59765251_59765707	-6.94376	4.04682	11.4606	0.00960669	0.651813
chrUn_gl000222_84014_84731	0.909611	6.18956	9.78035	0.00964601	0.651813
chr10_39093887_39094395	1.2389	6.37378	9.76853	0.00967855	0.651813
chrY_13467843_13468581	0.606298	8.21357	9.76392	0.0096913	0.651813
chr17_60214164_60215824	0.515263	5.64052	10.1395	0.00970645	0.651813
chr3_64164093_64164370	-6.98453	4.07195	11.4097	0.00971409	0.651813
chr1_55487718_55488021	-0.730194	5.15628	9.75455	0.00971722	0.651813
chr4_49111703_49112096	1.08137	7.66787	9.75089	0.00972738	0.651813
chr5_75779387_75779875	-6.48054	3.69079	11.4033	0.00972776	0.651813
chr8_85538381_85538713	-0.508263	5.87824	9.74491	0.00974397	0.651813
chr1_234859424_234860722	-0.681626	5.38954	9.74319	0.00974877	0.651813
chr6_121508565_121509458	-0.479962	6.18583	9.73223	0.00977932	0.651813
chr16_26580986_26581392	-6.49507	3.69322	11.3468	0.0098492	0.651813
chr1_219589839_219590402	-0.526472	6.04761	9.69381	0.00988732	0.651813
chrX_120470884_120471218	-6.47617	3.68723	11.2783	0.00999878	0.651813
chr16_46407927_46408678	3.49956	6.43774	9.6484	0.0100168	0.651813
chr2_65938042_65938586	-6.4693	3.68242	11.2664	0.0100251	0.651813
chr19_41082616_41083055	6.44936	3.64525	11.2611	0.0100368	0.651813
chr5_153476575_153476868	-6.47449	3.68202	11.2403	0.010083	0.651813
chr3_189022249_189023130	-0.662638	5.32052	9.60124	0.0101534	0.651813
chr2_138266081_138266686	-0.480501	5.90682	9.59867	0.0101609	0.651813
chr11_16653862_16654360	-6.46191	3.67284	11.187	0.0102026	0.651813
chr2_178628274_178628821	-0.679277	5.52663	9.56497	0.01026	0.651813
chr5_46323698_46323868	6.87136	3.98176	11.1494	0.0102881	0.651813
chr7_90557872_90558667	-0.472828	7.03493	9.55224	0.0102978	0.651813
chrUn_gl000214_64156_65317	0.788805	7.46476	9.54488	0.0103196	0.651813
chr20_61847102_61847946	0.568858	5.24748	9.54392	0.0103225	0.651813
chr1_210827244_210827506	6.42315	3.6312	11.1248	0.0103445	0.651813
chr11_122852472_122852915	-6.45192	3.67205	11.1247	0.0103449	0.651813
chr19_7515540_7515951	6.93066	4.01776	11.0998	0.0104024	0.651813
chr17_57696436_57697637	0.49829	5.6644	9.51681	0.0104036	0.651813
chr2_1136015_1136381	-0.649135	5.77155	9.49305	0.0104754	0.651813
chr14_23938430_23939149	0.608749	5.55254	9.46862	0.0105497	0.651813
chr12_83782959_83783589	-0.61081	5.30081	9.45511	0.0105911	0.651813
chr15_22512050_22512515	-6.45497	3.6645	11.0093	0.0106146	0.651813
chr11_61159808_61160292	6.40439	3.61934	10.9958	0.0106468	0.651813
chr5_7851876_7852175	-6.45067	3.66116	10.9829	0.0106778	0.651813
chr16_46403436_46403820	1.44925	7.79574	9.40723	0.0107394	0.651813
chr17_73284966_73286016	0.544789	5.91075	9.38944	0.0107951	0.651813
chr8_120885730_120887078	-1.10156	6.27964	9.3665	0.0108675	0.651813
chr3_149530289_149531674	-0.82948	5.48967	9.30383	0.0110682	0.651813
chr9_87947487_87947771	-0.627988	5.28283	9.30019	0.01108	0.651813
chr7_157940219_157940739	1.57264	5.02552	9.28862	0.0111175	0.651813
chr5_71146761_71146939	1.97035	5.83744	9.28638	0.0111248	0.651813
chr8_134583796_134584806	-0.501369	5.82231	9.27479	0.0111626	0.651813
chr16_33900277_33900776	1.60261	6.26939	9.27122	0.0111743	0.651813
chr6_95612794_95613241	-0.695207	5.2421	9.26428	0.0111971	0.651813
chr9_72653088_72653553	1.14752	6.90979	9.25651	0.0112226	0.651813
chrX_115004661_115005216	0.674127	5.98261	9.25467	0.0112287	0.651813
chr1_155197155_155197720	0.718268	5.08228	9.23282	0.0113009	0.651813
chr16_65847399_65847895	-6.40742	3.63695	10.7184	0.0113357	0.651813
chr14_39391203_39391653	-6.42523	3.64721	10.6967	0.0113918	0.651813
chr10_135500046_135501364	0.641982	6.24603	9.20412	0.0113966	0.651813
chr3_166902290_166902728	-0.564013	5.6217	9.19737	0.0114193	0.651813
chr11_3675049_3676017	1.18403	4.99394	9.19018	0.0114435	0.651813
chrX_12759410_12760030	-0.476329	5.79864	9.25044	0.0114951	0.651813
chr9_121284447_121284643	-6.40435	3.63065	10.6516	0.0115098	0.651813
chr16_89989433_89989811	6.78447	3.91848	10.6443	0.0115291	0.651813
chr6_83397638_83398550	-6.39907	3.62837	10.6264	0.0115764	0.651813
chr2_198033462_198033771	-6.82273	3.96038	10.615	0.0116066	0.651813
chr9_66825759_66825935	6.78076	3.91294	10.6088	0.0116231	0.651813
chrUn_gl000225_111117_111618	0.647299	7.85559	9.1353	0.0116301	0.651813
chr3_22784644_22785255	-0.52638	5.79094	9.1328	0.0116387	0.651813
chr5_94043129_94043386	6.36088	3.58116	10.5774	0.0117072	0.651813
chr6_153824900_153825338	-6.38697	3.61882	10.5428	0.0118006	0.651813
chr21_40159442_40159963	-0.586969	5.15937	10.0251	0.0118476	0.651813
chr16_21531248_21531973	0.625069	5.067	9.09691	0.0118816	0.651813
chr20_46169069_46169927	1.93942	5.2417	9.04787	0.0119351	0.651813
chr8_43094536_43095317	1.03328	10.316	9.04355	0.0119504	0.651813
chr10_6056028_6056349	6.32442	3.55775	10.4822	0.0119668	0.651813
chr2_154334913_154335730	-0.536499	5.76928	9.03158	0.0119929	0.651813
chr5_60974767_60975085	-6.81467	3.957	10.4379	0.01209	0.651813
chr3_15900466_15902363	-0.675998	5.63816	8.96935	0.0122171	0.651813
chr1_181002574_181003363	-0.476621	5.74123	11.3105	0.0122969	0.651813
chrX_130422818_130423472	-0.572479	5.26723	9.51895	0.0123435	0.651813
chr2_179884745_179885349	-0.547614	5.38976	8.98189	0.0123773	0.651813
chr8_107093153_107093658	-0.612121	5.26246	8.91102	0.0124318	0.651813
chr1_237634259_237634455	-6.35481	3.60192	10.3135	0.0124449	0.651813
chr3_159450030_159450550	-6.36189	3.59767	10.3068	0.0124643	0.651813
chr4_560455_560586	6.74386	3.88795	10.2898	0.0125139	0.651813
chrX_106209574_106210248	-0.529154	6.49905	8.87813	0.0125548	0.651813
chr5_145671115_145671323	-6.35571	3.59692	10.2712	0.0125685	0.651813
chr6_96462982_96464383	-0.558697	5.76646	8.87105	0.0125815	0.651813
chr1_235667317_235668755	-0.497947	6.00078	8.86599	0.0126006	0.651813
chr17_61194450_61195004	-6.34663	3.59456	10.2544	0.0126179	0.651813
chrUn_gl000225_133688_133877	0.740823	7.7923	8.86123	0.0126186	0.651813
chr4_159289095_159289890	-0.46347	5.90533	8.85732	0.0126334	0.651813
chr7_33101871_33103079	-0.501887	7.02128	8.85279	0.0126506	0.651813
chr8_125150371_125151113	-0.505465	5.5476	9.83489	0.0127057	0.651813
chr3_156956689_156957357	-0.454769	5.86126	9.07437	0.0127664	0.651813
chr11_94698187_94698382	-6.34171	3.59039	10.2034	0.0127699	0.651813
chr8_134508768_134508953	-6.79868	3.93368	10.1952	0.0127944	0.651813
chr16_75063552_75064098	-6.34754	3.58951	10.1906	0.0128084	0.651813
chr5_116283560_116284052	-0.488747	5.77329	8.80452	0.0128355	0.651813
chr15_30904381_30904569	-6.32592	3.57386	10.169	0.0128737	0.651813
chr3_170886027_170886245	-1.28201	5.21349	8.7738	0.0129548	0.651813
chr1_175166764_175166994	6.71703	3.86595	10.1204	0.0130219	0.651813
chr1_219559154_219559804	-0.486921	5.76119	10.9	0.0130672	0.651813
chr1_206808645_206809291	0.580986	5.21145	9.56323	0.0130735	0.651813
chr10_42386952_42387493	1.32995	9.11487	8.74346	0.013074	0.651813
chr2_210660601_210661031	-6.76526	3.91305	10.0826	0.0131389	0.651813
chrUn_gl000225_131565_131949	0.693099	8.0719	8.71948	0.0131691	0.651813
chr17_51227480_51227876	-6.32722	3.5698	10.0571	0.0132183	0.651813
chr2_134023435_134024462	-6.35049	3.5832	10.036	0.0132848	0.651813
chr1_240286146_240286671	-0.504566	5.57422	8.67704	0.0133395	0.651813
chrX_48931460_48931892	-6.318	3.56346	10.0135	0.0133561	0.651813
chr10_42599097_42600457	1.06353	10.1612	8.66465	0.0133897	0.651813
chr4_141294126_141295191	-0.499723	6.02858	8.65257	0.0134389	0.651813
chr2_12667252_12667572	-6.29822	3.55524	9.97949	0.0134645	0.651813
chr5_147100831_147101487	-0.465134	5.72149	11.7086	0.013519	0.651813
chr9_1336813_1337615	0.627142	5.2554	8.632	0.0135232	0.651813
chr1_209920983_209921508	-0.483225	6.41384	8.63132	0.013526	0.651813
chr5_39712933_39713380	6.2211	3.48189	9.95374	0.0135474	0.651813
chrX_37764599_37765385	-6.29961	3.55156	9.93718	0.013601	0.651813
chr8_141108800_141109629	-0.593256	5.63641	8.61311	0.0136011	0.651813
chr16_89307025_89307949	0.688979	5.20292	8.60882	0.0136189	0.651813
chr4_115963655_115964095	-6.742	3.89702	9.916	0.0136701	0.651813
chr2_53429264_53429584	-6.27039	3.53814	9.90815	0.0136958	0.651813
chr7_38393792_38394145	-0.466772	5.68859	8.57825	0.0137464	0.651813
chr21_27107069_27108155	0.762258	5.58919	8.56699	0.0137937	0.651813
chr20_29829347_29829761	1.91416	5.61329	8.56682	0.0137944	0.651813
chr3_139238986_139239287	-6.2764	3.53666	9.87798	0.0137951	0.651813
chr6_61914110_61914397	1.36805	6.13659	8.56303	0.0138104	0.651813
chr7_97541033_97541324	-6.31472	3.56061	9.86858	0.0138262	0.651813
chr1_179560623_179561477	-0.469701	5.9011	8.53968	0.0139093	0.651813
chr6_122931084_122932461	-0.82791	5.69531	8.52868	0.0139561	0.651813
chr1_184355571_184357127	0.823737	5.03076	8.52132	0.0139876	0.651813
chr6_155054170_155055571	-0.467102	5.86367	10.1162	0.0139942	0.651813
chr1_116004273_116004458	-6.76185	3.90432	9.81304	0.0140119	0.651813
chr2_19005527_19006043	-0.492024	5.52611	8.9087	0.0140123	0.651813
chrX_99891204_99892083	-0.458592	6.15867	8.5153	0.0140134	0.651813
chr21_32881602_32882215	-6.25746	3.52458	9.80976	0.014023	0.651813
chr1_176175804_176177008	-0.41178	6.73055	8.51109	0.0140315	0.651813
chr4_119273891_119274475	-0.540602	5.32534	10.2151	0.0140624	0.651813
chr9_80619364_80619857	-6.24814	3.51933	9.77598	0.0141376	0.651813
chr6_28047679_28048234	0.798414	4.85823	8.48342	0.014151	0.651813
chr5_120444415_120444830	-0.613709	5.71307	8.47696	0.0141791	0.651813
chr13_39260190_39261351	-0.634136	5.38465	8.46664	0.0142241	0.651813
chr11_94840443_94840955	-6.23761	3.51458	9.74893	0.0142303	0.651813
chr17_42084010_42084682	6.17494	3.45423	9.74763	0.0142347	0.651813
chr2_212216733_212217005	-6.28618	3.53981	9.74701	0.0142369	0.651813
chr14_74769430_74770048	0.887033	4.86021	8.45446	0.0142774	0.651813
chr11_19138462_19139429	-0.813702	5.60955	8.4543	0.0142781	0.651813
chrX_109411207_109411690	-0.865576	4.92403	8.44679	0.0143111	0.651813
chr12_101065809_101066076	-6.72292	3.88012	9.70931	0.0143673	0.651813
chr20_25603931_25605160	0.568834	5.21337	8.43402	0.0143674	0.651813
chr2_199826210_199826680	-6.2641	3.52515	9.70268	0.0143904	0.651813
chr12_97542686_97543166	-0.571657	5.32146	12.1605	0.0144334	0.651813
chr12_84902149_84902627	-0.525217	5.85141	8.41582	0.0144481	0.651813
chr1_216367272_216367833	-0.466029	5.86031	9.24417	0.0145059	0.651813
chr3_38016065_38016558	-6.24384	3.51348	9.65258	0.0145665	0.651813
chrUn_gl000220_117764_119316	0.725239	9.37504	8.38733	0.0145756	0.651813
chr6_130257641_130258125	-0.554467	5.17153	8.37634	0.0146251	0.651813
chr2_132996505_132996869	2.35172	6.40043	8.36881	0.0146591	0.651813
chr8_133787269_133788125	-0.4837	6.35955	8.36012	0.0146985	0.651813
chr5_134977205_134978094	-0.553438	5.56945	8.35623	0.0147162	0.651813
chr16_87495105_87495408	0.585443	5.34597	8.34274	0.0147778	0.651813
chr10_23446968_23447561	-6.20421	3.491	9.59245	0.0147814	0.651813
chr17_59910839_59911332	0.450824	7.28799	8.33059	0.0148334	0.651813
chrUn_gl000216_169486_169832	0.68352	8.38992	8.31965	0.0148838	0.651813
chr8_43793661_43794309	1.14916	7.36599	8.31638	0.0148989	0.651813
chr5_156938570_156939180	-0.885795	5.24483	8.30261	0.0149626	0.651813
chr4_15471329_15471574	-6.19007	3.47963	9.53422	0.0149933	0.651813
chr3_24201881_24202311	-6.21644	3.49119	9.52702	0.0150198	0.651813
chr4_123866282_123867134	-0.661679	5.24786	8.28977	0.0150223	0.651813
chr2_105961165_105961623	-6.21143	3.48793	9.51777	0.0150539	0.651813
chrY_28800051_28800277	1.85096	5.5956	8.27411	0.0150955	0.651813
chr9_82104233_82105027	-0.523975	5.50287	8.27223	0.0151043	0.651813
chr6_100930548_100930849	-6.20634	3.48413	9.50413	0.0151044	0.651813
chr4_120221452_120222202	-0.437371	6.0574	8.26813	0.0151236	0.651813
chr6_692429_693565	-0.511078	5.34743	9.90408	0.0151443	0.651813
chr8_91533364_91533675	-6.69561	3.85969	9.48208	0.0151864	0.651813
chr20_13765189_13766295	-0.666066	5.43839	8.25404	0.01519	0.651813
chr1_110526972_110527704	0.551669	5.52661	8.24839	0.0152168	0.651813
chr3_62304190_62305883	-1.0775	6.83526	8.24502	0.0152327	0.651813
chr8_19278856_19279463	-6.18078	3.47104	9.45954	0.0152708	0.651813
chr13_108870526_108871186	-0.627054	4.99479	8.23256	0.0152919	0.651813
chr8_91341163_91341476	-0.455784	5.95575	9.0145	0.0152975	0.651813
chr14_97912384_97912739	-6.25101	3.51096	9.43647	0.0153578	0.651813
chr11_85195036_85195269	6.71249	3.85791	9.43564	0.015361	0.651813
chr14_81053488_81053723	-6.20718	3.48225	9.43265	0.0153723	0.651813
chrY_297627_298075	-6.17658	3.46568	9.4303	0.0153812	0.651813
chr8_110294121_110294796	-0.406884	7.25042	8.18766	0.0155076	0.651813
chr5_166214904_166215638	-6.18723	3.46918	9.38804	0.0155426	0.651813
chr6_153722963_153723571	-0.550044	5.31247	10.5262	0.0155634	0.651813
chr20_26317915_26318586	1.33975	6.63652	8.17477	0.0155702	0.651813
chr5_145945372_145945859	-1.32971	5.11322	8.15442	0.0156696	0.651813
chr11_62521249_62521944	0.56691	5.12112	8.64043	0.015732	0.651813
chr14_87516339_87516843	-0.579132	5.45571	8.13754	0.0157526	0.651813
chr10_59845973_59846972	-6.19816	3.47402	9.33234	0.0157585	0.651813
chr3_64229970_64230513	-0.423819	7.42912	8.13471	0.0157666	0.651813
chr4_173628787_173629156	-6.15097	3.44918	9.32922	0.0157707	0.651813
chr10_42384391_42385721	1.0761	9.92768	8.13022	0.0157888	0.651813
chr1_107221308_107221772	2.17323	5.13156	8.12626	0.0158084	0.651813
chr14_77315307_77315545	-6.14554	3.45	9.31372	0.0158315	0.651813
chrUn_gl000216_14951_15214	3.39065	6.04634	8.12001	0.0158394	0.651813
chr2_11828324_11828804	-0.755826	5.08507	8.11492	0.0158647	0.651813
chr9_68424272_68424815	2.91206	4.55792	8.11212	0.0158787	0.651813
chr10_28591569_28592328	-0.417784	5.9566	8.79511	0.016115	0.651813
chr1_115594728_115595576	-0.404226	6.53827	8.05316	0.0161757	0.651813
chr16_23521400_23522214	0.562441	5.19054	8.03297	0.0162797	0.651813
chr13_109387011_109387323	-6.67827	3.8386	9.19924	0.01629	0.651813
chr5_89769914_89770987	-0.39736	6.05941	8.02817	0.0163036	0.651813
chr7_143336520_143336786	-6.66256	3.83412	9.19475	0.0163083	0.651813
chr4_49131973_49132173	1.70654	6.31326	8.02707	0.0163092	0.651813
chr9_103360805_103361306	-0.506307	6.10041	8.01279	0.0163829	0.651813
chr8_43095882_43096169	0.981225	10.0302	8.01061	0.0163942	0.651813
chr11_51588730_51589133	1.09418	8.73656	7.98688	0.0165176	0.651813
chr16_33875594_33875914	-6.71334	3.8573	9.1168	0.0166306	0.651813
chr1_97709565_97709910	-5.83032	3.23971	9.11586	0.0166345	0.651813
chr9_7052645_7052964	-0.640654	5.27276	7.96251	0.0166454	0.651813
chr2_130750133_130750510	-5.80751	3.21606	9.1125	0.0166486	0.651813
chr2_64743778_64744215	-6.10595	3.41637	9.11149	0.0166528	0.651813
chr7_72476243_72476952	0.555694	5.27676	9.33202	0.0166964	0.651813
chr5_150786000_150786340	-6.09536	3.4098	9.09995	0.0167013	0.651813
chr4_49516692_49517094	2.06739	6.19358	7.94726	0.016726	0.651813
chr16_46391069_46392354	1.30402	7.92614	7.94721	0.0167263	0.651813
chr9_80204087_80204885	-0.570241	5.58665	7.94698	0.0167275	0.651813
chr3_145088454_145088915	-6.09483	3.41333	9.08012	0.016785	0.651813
chr9_138307232_138307388	6.64053	3.78954	9.0795	0.0167876	0.651813
chr11_117049141_117049834	-5.87024	3.25582	9.06248	0.0168599	0.651813
chr1_50400561_50401132	-6.07734	3.40403	9.06243	0.0168601	0.651813
chrUn_gl000216_136540_136914	0.658573	6.90042	7.91359	0.0169057	0.651813
chr6_49998456_49999131	-0.480729	5.65952	9.33619	0.0169083	0.651813
chr3_63350306_63351033	-0.479089	6.12107	7.90402	0.0169572	0.651813
chr2_210616181_210616892	-5.95295	3.31049	9.03252	0.0169881	0.651813
chr7_143892297_143893209	-0.460066	6.11872	7.89685	0.0169959	0.651813
chr15_20859107_20859441	-6.6578	3.82614	9.02839	0.0170058	0.651813
chr7_11012727_11013756	-0.448992	6.71729	7.89266	0.0170185	0.651813
chr6_165129423_165129825	-6.02968	3.36918	9.01935	0.0170448	0.651813
chr1_69389357_69389852	-6.04281	3.37187	9.00309	0.0171152	0.651813
chr12_85083409_85083826	-6.00996	3.34828	8.98909	0.0171761	0.651813
chr8_109237293_109237756	-6.6251	3.80408	8.98201	0.017207	0.651813
chr9_1470030_1470510	-5.99377	3.33546	8.97192	0.0172511	0.651813
chr20_52480451_52482077	0.7346	7.39251	7.84825	0.017261	0.651813
chr2_184159846_184160335	-0.840953	5.34636	7.83179	0.0173519	0.651813
chr17_58189185_58189397	2.22269	5.80432	7.81328	0.0174548	0.651813
chr4_138928657_138929032	-6.61008	3.79331	8.91389	0.0175079	0.651813
chr16_730092_730475	6.53974	3.73031	8.91114	0.0175202	0.651813
chr9_66833769_66834032	1.42465	7.41347	7.79263	0.0175705	0.651813
chr2_122645733_122646036	-6.61415	3.79435	8.88863	0.0176212	0.651813
chr8_128888345_128888587	-6.625	3.80071	8.88764	0.0176256	0.651813
chr18_18512838_18513288	1.34929	7.54166	7.78102	0.017636	0.651813
chr1_165667127_165668169	-0.51885	5.7358	7.77431	0.0176739	0.651813
chr3_142575879_142576187	-0.517896	5.86649	7.77236	0.0176849	0.651813
chr1_116563406_116563747	-0.584662	5.34495	7.76622	0.0177198	0.651813
chr7_134001340_134002180	-0.423956	6.40548	7.76539	0.0177245	0.651813
chr8_110986405_110987163	-0.459512	7.07202	7.76457	0.0177291	0.651813
chr3_67998373_67999024	-0.608163	5.34469	7.76262	0.0177403	0.651813
chr8_104992523_104993142	-0.576149	5.75314	7.74858	0.0178203	0.651813
chr10_129845656_129845958	-0.570352	5.69769	7.74797	0.0178238	0.651813
chrUn_gl000228_117017_117741	0.593425	8.64535	7.74453	0.0178435	0.651813
chr17_60094666_60095806	0.914667	4.79273	7.74172	0.0178596	0.651813
chr6_61912904_61913087	2.44401	5.29224	7.73671	0.0178884	0.651813
chr7_32529634_32530197	0.493071	5.72898	7.73614	0.0178916	0.651813
chr7_89840831_89841599	-0.426916	6.56511	7.73317	0.0179088	0.651813
chr6_123110263_123111310	-0.457801	5.66341	10.3374	0.0179495	0.651813
chr4_49093802_49094159	1.45137	6.07573	7.71972	0.0179864	0.651813
chr14_101339579_101339751	6.52567	3.72268	8.80701	0.0179935	0.651813
chr1_207872149_207872523	-0.538604	5.36096	8.14692	0.0179997	0.651813
chr3_171858304_171859059	-0.590021	5.45451	7.71277	0.0180266	0.651813
chrUn_gl000225_21583_21945	0.617165	7.22145	7.70824	0.0180529	0.651813
chr6_145298320_145298962	-0.685198	5.18033	7.70774	0.0180558	0.651813
chr4_174458105_174458286	-6.58825	3.77707	8.78716	0.0180856	0.651813
chr7_158380336_158380662	-6.57895	3.77497	8.77888	0.0181242	0.651813
chrY_13140128_13141254	0.952578	6.18647	7.69383	0.0181368	0.651813
chr1_171157669_171158447	-0.51421	5.69967	7.69021	0.018158	0.651813
chr12_95396993_95397732	-0.53264	5.21982	8.93962	0.0181723	0.651813
chr4_119756815_119757825	-0.556983	5.22084	10.8238	0.0181723	0.651813
chr11_51569591_51570252	1.09462	6.83576	7.68553	0.0181854	0.651813
chr3_173256259_173256512	-6.58879	3.77595	8.75654	0.0182288	0.651813
chr12_53689077_53689556	6.57132	3.73996	8.75622	0.0182303	0.651813
chr4_159823664_159824148	-0.467017	5.56767	7.6705	0.0182737	0.651813
chr4_49132734_49132962	2.91986	5.73711	7.66925	0.0182811	0.651813
chr21_9825559_9827514	0.725563	8.68816	7.66787	0.0182892	0.651813
chr11_108535425_108536149	-0.803966	5.06389	7.65848	0.0183447	0.651813
chr6_61913330_61913526	3.71442	5.7137	7.64897	0.0184012	0.651813
chr8_111746254_111746430	-6.58751	3.77443	8.71854	0.0184084	0.651813
chr3_125238527_125239392	0.781715	4.83617	7.64561	0.0184211	0.651813
chr8_112943345_112944007	-0.558424	5.90249	7.63981	0.0184557	0.651813
chr4_113206792_113207400	0.612907	5.09916	7.63399	0.0184905	0.651813
chr6_148512723_148513415	-0.578285	5.58489	7.62885	0.0185212	0.651813
chr2_187612926_187613422	-0.670477	5.26207	7.62088	0.0185691	0.651813
chr8_130443866_130444724	-0.447317	6.01994	7.60922	0.0186393	0.651813
chr10_128286697_128286865	-6.59268	3.77283	8.65734	0.0187025	0.651813
chrX_61687279_61687567	3.28242	5.96895	7.5987	0.0187029	0.651813
chr16_87416839_87418034	0.548401	5.17954	7.592	0.0187436	0.651813
chr1_196342053_196342594	-0.559514	5.26209	7.58715	0.018773	0.651813
chr20_49126474_49127117	0.458911	6.01964	7.58584	0.0187811	0.651813
chr1_196701607_196702077	-6.57959	3.77366	8.62744	0.0188484	0.651813
chr2_228410707_228411278	-0.635476	4.97359	7.56745	0.0188934	0.651813
chr3_62095216_62095595	-1.90877	5.29728	7.56437	0.0189123	0.651813
chr1_115097227_115097520	-6.58041	3.76509	8.60744	0.0189467	0.651813
chr1_154974346_154974869	-6.57766	3.7627	8.59685	0.018999	0.651813
chr4_109541334_109542236	-0.440613	5.65526	8.20495	0.0190338	0.651813
chr1_183604359_183605475	-0.503221	5.8747	7.54099	0.0190566	0.651813
chr6_154664849_154665743	-0.416645	7.10547	7.53979	0.019064	0.651813
chr17_46908221_46908853	0.515438	5.41616	7.53825	0.0190736	0.651813
chr3_39192750_39193038	-6.56558	3.75586	8.57779	0.0190937	0.651813
chr2_149266803_149267394	-0.436681	5.86396	7.53323	0.0191047	0.651813
chr4_49646658_49646832	3.10925	6.18814	7.53273	0.0191079	0.651813
chr7_154568686_154569064	-6.55685	3.7533	8.56929	0.0191361	0.651813
chr4_49636156_49636614	1.98494	6.15272	7.5176	0.0192022	0.651813
chr11_51579367_51579702	1.21195	8.65241	7.51483	0.0192196	0.651813
chr4_174130585_174131111	-0.400644	6.05712	7.50875	0.0192577	0.651813
chr13_72795366_72795903	-0.664269	5.37557	7.5069	0.0192693	0.651813
chr3_62514868_62515355	-0.480897	6.29927	7.50643	0.0192723	0.651813
chr3_19584511_19585326	-0.529853	5.36754	8.11955	0.0193083	0.651813
chrUn_gl000225_50475_51232	0.669802	8.60329	7.49351	0.0193536	0.651813
chr3_171421775_171422086	-6.52971	3.73863	8.5081	0.019445	0.651813
chrUn_gl000235_1737_2296	0.582878	5.55354	7.4742	0.0194761	0.651813
chr7_23996_24455	6.5413	3.71534	8.5003	0.0194848	0.651813
chr3_78724348_78724994	-0.463704	5.75569	7.46375	0.0195427	0.651813
chr2_200320442_200320912	6.45367	3.66811	8.47858	0.0195962	0.651813
chr16_420533_420725	6.46427	3.67726	8.47058	0.0196374	0.651813
chr2_169204681_169204992	-6.53675	3.74175	8.46294	0.0196769	0.651813
chr1_87916473_87916848	-0.594699	5.468	7.43644	0.019718	0.651813
chr2_21185655_21186270	-0.666095	5.07764	7.43232	0.0197447	0.651813
chr4_115728747_115729414	-0.597563	5.29714	7.43091	0.0197538	0.651813
chr5_17951522_17952427	-0.479554	5.63473	7.42558	0.0197883	0.651813
chr6_136571038_136571977	-0.448164	6.07065	7.42082	0.0198192	0.651813
chr20_58530221_58530784	-0.510743	5.31944	10.7957	0.0198989	0.651813
chr3_22636444_22636775	6.55184	3.71539	8.41879	0.0199071	0.651813
chr11_65264695_65265354	0.837678	4.78208	7.40555	0.0199187	0.651813
chr17_56918308_56918984	-6.5255	3.73191	8.41089	0.0199486	0.651813
chr16_83566532_83567149	0.683084	5.10305	7.38738	0.0200379	0.651813
chr12_62828613_62830008	-0.556155	5.1188	7.37622	0.0201116	0.651813
chr12_80871314_80872002	-0.378922	6.27517	7.37147	0.020143	0.651813
chr1_219491125_219491386	-0.51625	5.53315	7.37106	0.0201457	0.651813
chr17_64795255_64795556	6.43249	3.654	8.35304	0.0202562	0.651813
chr9_69710860_69711335	1.00575	8.77591	7.35428	0.0202573	0.651813
chr14_100680343_100681141	0.510522	5.21798	7.6397	0.0202704	0.651813
chrX_149106648_149107105	-0.427305	6.20988	7.34748	0.0203026	0.651813
chr16_33974076_33975863	0.94422	5.98376	7.34474	0.020321	0.651813
chr2_166060457_166060788	-6.49905	3.71495	8.33935	0.0203299	0.651813
chr20_62958919_62959706	0.527785	5.2378	10.703	0.0203523	0.651813
chr2_181844839_181845763	-0.552708	5.54614	7.33818	0.0203649	0.651813
chr1_179074562_179074825	-0.717542	5.05726	7.33343	0.0203968	0.651813
chr3_189034057_189034630	-0.544376	5.27678	8.69723	0.0204963	0.651813
chr7_20369133_20370936	-0.577809	5.33234	7.30828	0.0205668	0.651813
chr7_55482892_55483142	-6.49653	3.7077	8.29286	0.0205826	0.651813
chr8_96249482_96249675	-6.50084	3.7112	8.28992	0.0205987	0.651813
chr6_116550318_116550921	-0.40098	5.96115	7.29045	0.0206883	0.651813
chr3_25482639_25483164	-6.50393	3.71054	8.26955	0.0207107	0.651813
chr3_190303589_190304046	-0.649944	5.24892	7.27651	0.020784	0.651813
chr5_167391668_167391841	-6.49478	3.70805	8.25631	0.020784	0.651813
chr3_18913920_18914268	-6.47888	3.69879	8.25474	0.0207927	0.651813
chr14_89643706_89644252	-6.56563	3.74772	8.25276	0.0208037	0.651813
chr20_50240866_50241165	-6.47935	3.70008	8.23751	0.0208886	0.651813
chr1_233016183_233016581	-6.47996	3.69881	8.22966	0.0209324	0.651813
chr3_40350703_40351592	-0.475822	5.79421	8.05912	0.0209364	0.651813
chr8_121617807_121618303	-0.397907	5.90597	7.48189	0.0210386	0.651813
chr7_84330961_84331608	-1.31581	4.92264	7.23673	0.0210597	0.651813
chr20_55549558_55550017	-6.48557	3.70556	8.2008	0.0210947	0.651813
chr1_207226210_207227074	-0.404198	6.89721	7.22905	0.0211134	0.651813
chr1_67966155_67966430	-0.571112	5.15189	7.22422	0.0211473	0.651813
chr14_79303184_79303605	-0.519779	5.57426	7.22036	0.0211744	0.651813
chr6_136172550_136173084	-0.512459	5.36724	7.20102	0.021311	0.651813
chr5_95296543_95297910	-0.426511	6.15193	7.17713	0.0214812	0.651813
chr3_35865565_35866237	-0.698135	5.10728	7.1725	0.0215143	0.651813
chr3_131753441_131754130	-0.469967	5.5939	7.15906	0.0216109	0.651813
chr2_182879135_182879316	-6.45619	3.67885	8.10756	0.02163	0.651813
chr20_46523471_46524799	0.857757	6.5213	7.15549	0.0216366	0.651813
chr9_140563818_140564012	6.40241	3.62726	8.10505	0.0216446	0.651813
chr6_154769606_154769806	-6.4757	3.69507	8.09596	0.0216978	0.651813
chr8_97295071_97295553	-0.514146	5.74941	7.1463	0.0217031	0.651813
chr13_67804246_67805599	-0.781065	5.38014	7.14064	0.0217441	0.651813
chr6_143268465_143268801	6.43973	3.64107	8.08804	0.0217442	0.651813
chr16_30064236_30064843	0.622836	5.0902	7.13833	0.0217609	0.651813
chr19_12900760_12901114	6.37513	3.61167	8.08306	0.0217735	0.651813
chr7_38375162_38375673	-0.441602	6.35539	7.12872	0.0218309	0.651813
chr16_73210568_73210856	-6.45362	3.68026	8.05732	0.0219255	0.651813
chr4_127989163_127989835	-0.529088	5.4666	7.11345	0.0219427	0.651813
chr4_139162962_139163784	-0.569315	5.63267	7.11103	0.0219604	0.651813
chr11_64052664_64053333	6.4703	3.65818	8.04991	0.0219696	0.651813
chr2_220093876_220095113	0.669441	5.16426	7.10793	0.0219832	0.651813
chr7_103507256_103507801	6.36988	3.60585	8.04602	0.0219927	0.651813
chr3_61613514_61613959	0.428284	5.99417	9.09063	0.0220143	0.651813
chr3_169482426_169483106	0.545733	5.38002	7.09961	0.0220445	0.651813
chr3_132035952_132036758	-0.474474	5.46981	7.14271	0.0220776	0.651813
chr3_105020198_105020469	5.35514	2.94578	8.02875	0.0220959	0.651813
chr11_10472527_10472914	-5.01957	2.77532	8.02833	0.0220984	0.651813
chr15_86401933_86402340	-0.83728	4.79741	7.08723	0.0221361	0.651813
chr7_76067158_76067518	-6.44847	3.68452	8.01582	0.0221735	0.651813
chr2_54506489_54506840	-6.43011	3.66264	8.01547	0.0221756	0.651813
chr1_145610601_145611490	0.651966	4.90281	7.07969	0.0221921	0.651813
chr5_83014093_83014272	6.37673	3.61047	8.0066	0.0222291	0.651813
chr2_11573_11910	-0.825371	5.24477	7.07316	0.0222408	0.651813
chrUn_gl000225_67256_67662	0.583117	8.82824	7.07301	0.0222419	0.651813
chr2_112048072_112048320	6.35092	3.5935	8.00419	0.0222437	0.651813
chr16_46406284_46407050	1.20575	7.46504	7.07109	0.0222562	0.651813
chr1_190053747_190054064	-6.44506	3.66805	7.98906	0.0223353	0.651813
chr4_145689705_145690401	-0.597637	5.37276	7.05771	0.0223564	0.651813
chr12_83302983_83303178	5.37149	2.95377	7.98517	0.022359	0.651813
chrUn_gl000225_85585_86157	0.640582	8.5211	7.05304	0.0223915	0.651813
chr16_88923143_88923780	0.590463	5.06746	7.04633	0.022442	0.651813
chr10_42409198_42409396	1.15949	7.45161	7.0441	0.0224588	0.651813
chr2_56411822_56412052	6.34316	3.58602	7.96208	0.0224999	0.651813
chr7_89179032_89179501	-0.594624	5.07745	7.0363	0.0225178	0.651813
chr6_116159749_116160436	-0.566519	5.22179	7.0356	0.0225231	0.651813
chr10_42356050_42357108	1.67544	7.03991	7.02884	0.0225744	0.651813
chr12_104323461_104324343	-0.37052	6.29349	7.02745	0.0225849	0.651813
chr13_47125669_47125907	-6.48753	3.69296	7.93396	0.0226731	0.651813
chr1_221915156_221916737	-0.760694	6.49717	7.01562	0.022675	0.651813
chr7_34967662_34968060	-0.444661	5.82538	7.01401	0.0226873	0.651813
chr11_133033300_133033624	-6.42397	3.65397	7.91912	0.0227653	0.651813
chr8_80894543_80895295	-0.615041	5.85443	7.00073	0.022789	0.651813
chr2_35337445_35338050	-0.600521	5.55944	7.00017	0.0227934	0.651813
chr3_4287304_4287864	-0.542111	5.19435	7.00007	0.0227941	0.651813
chr5_118914604_118914980	-0.666239	5.10222	6.9949	0.0228339	0.651813
chr13_79874380_79874935	-0.558772	5.13744	7.08456	0.0229192	0.651813
chr4_175395724_175396134	-6.40601	3.64349	7.89097	0.0229412	0.651813
chr1_195971333_195971957	-0.449207	5.96245	6.97832	0.022962	0.651813
chr11_27384394_27385090	-0.443057	5.97302	6.97698	0.0229723	0.651813
chr10_39125483_39125685	2.6016	6.47038	6.97367	0.022998	0.651813
chr5_147525200_147525803	-0.505274	5.30724	6.97059	0.0230219	0.651813
chr14_53570637_53571011	-0.622683	5.13414	6.96762	0.0230451	0.651813
chr9_130879855_130880279	6.44428	3.63331	7.87091	0.0230677	0.651813
chr7_102172118_102172531	-6.40353	3.64633	7.87026	0.0230719	0.651813
chr2_238200019_238200367	-5.14555	2.84321	7.86207	0.0231237	0.651813
chr20_48732441_48732805	0.625472	5.08009	6.95711	0.0231271	0.651813
chr17_53579055_53579741	-0.542022	5.42503	6.95333	0.0231566	0.651813
chr1_144989383_144989758	-6.42355	3.64841	7.85297	0.0231816	0.651813
chr2_197097591_197098263	-0.521239	5.44174	6.94528	0.0232198	0.651813
chr3_192315174_192316173	-0.39461	5.91807	7.73992	0.023223	0.651813
chr19_17416321_17416615	6.29769	3.55401	7.84331	0.0232431	0.651813
chr11_67056416_67057007	6.30146	3.55639	7.82784	0.0233423	0.651813
chr4_99582933_99583213	6.29281	3.55083	7.81441	0.0234287	0.651813
chr14_24563114_24563937	0.575389	5.31475	6.91652	0.023447	0.651813
chr15_72039955_72040248	-5.16608	2.85315	7.8095	0.0234604	0.651813
chrX_138208602_138209039	-1.1715	5.05306	6.9134	0.0234718	0.651813
chr16_76710117_76710747	0.523816	5.69967	6.91014	0.0234978	0.651813
chr10_42406577_42406805	1.02483	7.36823	6.90805	0.0235145	0.651813
chr3_17274788_17275132	-0.548235	5.35909	6.90725	0.0235209	0.651813
chr1_180239297_180239656	-6.40364	3.64256	7.79625	0.0235462	0.651813
chrX_130902337_130902715	-5.19464	2.87102	7.79411	0.0235602	0.651813
chr22_38349412_38349928	5.4882	3.02318	7.78704	0.0236061	0.651813
chrX_114925010_114925327	-6.39524	3.63767	7.78273	0.0236342	0.651813
chr3_107940909_107941843	-0.516327	6.10446	6.89305	0.0236345	0.651813
chr13_21951405_21951819	6.3021	3.55933	7.77214	0.0237034	0.651813
chr4_130383036_130383252	-5.19563	2.8662	7.77086	0.0237118	0.651813
chr11_66056288_66057191	0.654653	5.177	6.88217	0.023722	0.651813
chr12_56472812_56473155	6.28474	3.54305	7.76279	0.0237647	0.651813
chr8_92872493_92872740	-6.37125	3.62091	7.74555	0.0238783	0.651813
chr3_19896725_19897311	-6.3947	3.62949	7.74227	0.0239	0.651813
chr7_35547942_35548566	-6.36987	3.62383	7.73425	0.0239532	0.651813
chr1_190093240_190093450	6.37388	3.58482	7.73131	0.0239727	0.651813
chr9_103364748_103364915	6.26399	3.53245	7.7295	0.0239847	0.651813
chr11_118977919_118978289	6.26333	3.5294	7.72248	0.0240314	0.651813
chr4_125860983_125861343	-5.24209	2.89825	7.72143	0.0240384	0.651813
chr7_75368146_75368953	0.449019	5.9629	6.83968	0.0240674	0.651813
chr3_53289646_53290287	-5.2431	2.89362	7.71573	0.0240765	0.651813
chr6_153071932_153072124	-6.36446	3.62158	7.70616	0.0241405	0.651813
chr13_44127517_44127837	-5.26131	2.90783	7.68947	0.0242527	0.651813
chrUn_gl000226_3131_3548	1.07204	8.49188	6.8158	0.0242643	0.651813
chr9_117266711_117266970	6.24308	3.51644	7.68396	0.0242898	0.651813
chr1_186691756_186692338	-6.35805	3.61255	7.68015	0.0243155	0.651813
chr2_134043862_134044292	-5.27017	2.91094	7.67247	0.0243676	0.651813
chr16_88701387_88701614	6.37907	3.5876	7.67146	0.0243744	0.651813
chr5_87956448_87957350	-0.377292	6.84295	6.8001	0.0243947	0.651813
chr15_97838831_97839585	-0.521182	5.40568	6.81398	0.0244011	0.651813
chr16_3692649_3693063	6.24879	3.52278	7.66665	0.024407	0.651813
chr16_771172_771498	6.37725	3.59059	7.66482	0.0244195	0.651813
chr1_181645494_181645689	-6.37175	3.61441	7.66459	0.024421	0.651813
chr4_122865237_122865395	-6.36322	3.61045	7.65777	0.0244675	0.651813
chr8_101438789_101438946	6.26027	3.5247	7.65531	0.0244843	0.651813
chr12_124923628_124923952	6.23276	3.50993	7.65517	0.0244852	0.651813
chr1_121478617_121478998	3.47323	6.67971	6.78918	0.0244859	0.651813
chr2_100673008_100673242	5.55654	3.06358	7.65491	0.024487	0.651813
chr13_69260560_69261003	-5.28903	2.92046	7.65354	0.0244963	0.651813
chr3_4575410_4575723	-5.28903	2.92046	7.65354	0.0244963	0.651813
chr17_28113001_28113366	5.56668	3.06894	7.64863	0.0245299	0.651813
chr17_7218353_7218892	-5.25256	2.88996	7.64649	0.0245445	0.651813
chr13_90167021_90167450	-5.28801	2.92491	7.64601	0.0245478	0.651813
chr6_140688208_140688660	-6.34424	3.60271	7.64369	0.0245637	0.651813
chr10_97205706_97205939	-6.38216	3.61786	7.64126	0.0245804	0.651813
chr7_99097601_99098133	6.35971	3.57534	7.63092	0.0246514	0.651813
chr3_63551029_63551350	-6.36281	3.60831	7.62549	0.0246888	0.651813
chrX_37208208_37209164	-0.670896	5.03601	6.76403	0.0246975	0.651813
chr7_8257194_8257375	5.56253	3.06683	7.62401	0.024699	0.651813
chr18_73628163_73628514	-5.30663	2.93432	7.62133	0.0247175	0.651813
chr12_60429833_60430218	-5.30766	2.92993	7.6154	0.0247584	0.651813
chr21_38630280_38630677	-5.30766	2.92993	7.6154	0.0247584	0.651813
chrX_137968969_137969229	-5.30766	2.92993	7.6154	0.0247584	0.651813
chr11_115086479_115086812	-6.35422	3.60434	7.61217	0.0247808	0.651813
chr12_109197293_109197559	5.58004	3.08085	7.61067	0.0247912	0.651813
chr3_5467958_5468473	-0.466306	6.18693	6.74799	0.0248337	0.651813
chr2_166650258_166651324	-0.418361	6.60415	6.74268	0.024879	0.651813
chr12_44848669_44848973	5.60397	3.09349	7.59672	0.0248881	0.651813
chr22_33197364_33197914	-5.29828	2.91702	7.59492	0.0249006	0.651813
chr20_52590456_52590850	-2.02082	5.26764	6.73766	0.0249219	0.651813
chr1_16825597_16825871	5.60599	3.09453	7.59178	0.0249226	0.651813
chr16_82614021_82614276	6.21722	3.50013	7.58693	0.0249564	0.651813
chr7_143018539_143019256	-6.32233	3.58658	7.58132	0.0249956	0.651813
chr10_15560314_15560572	-6.3216	3.58813	7.57449	0.0250435	0.651813
chr1_22351587_22352484	5.6178	3.10082	7.57039	0.0250724	0.651813
chrX_71497006_71497260	5.6178	3.10082	7.57039	0.0250724	0.651813
chr10_118534320_118534673	-5.33248	2.95103	7.56925	0.0250804	0.651813
chr12_102737484_102737836	6.30906	3.53978	7.56714	0.0250952	0.651813
chr9_gl000199_random_140605_140782	2.98637	5.5537	6.71679	0.0251011	0.651813
chr1_232458026_232458349	-5.33457	2.94245	7.56474	0.0251121	0.651813
chr16_103190_103938	0.512043	5.26154	8.38806	0.0251142	0.651813
chr17_7165745_7166016	6.21273	3.49447	7.56393	0.0251178	0.651813
chr2_169193165_169193702	-0.473158	6.20403	6.71124	0.0251491	0.651813
chr12_85429824_85430500	0.456265	5.56696	8.7147	0.0251599	0.651813
chr12_60237154_60237478	5.6198	3.10186	7.55726	0.0251648	0.651813
chr6_114379646_114380081	-5.31442	2.93465	7.55552	0.0251771	0.651813
chr2_92308445_92308690	3.48375	7.40787	6.70542	0.0251994	0.651813
chrX_3468364_3468661	-5.35055	2.96028	7.55053	0.0252124	0.651813
chr4_174529518_174530335	-0.467962	5.80248	6.70381	0.0252134	0.651813
chr3_35701368_35701583	-6.3385	3.59193	7.54989	0.025217	0.651813
chr11_63705781_63706571	0.508771	5.30667	8.06903	0.0252186	0.651813
chr6_143046700_143047268	-5.31683	2.92657	7.54843	0.0252273	0.651813
chr14_71288472_71288974	6.20286	3.48546	7.54629	0.0252425	0.651813
chr1_231493711_231493960	5.5665	3.05114	7.54381	0.0252601	0.651813
chr14_105293863_105294222	6.1936	3.47965	7.53957	0.0252902	0.651813
chr1_194264756_194265301	-0.500979	5.48468	6.69324	0.0253052	0.651813
chr17_48133007_48133478	6.27911	3.52425	7.5371	0.0253077	0.651813
chr16_28961885_28962510	0.513174	5.30772	6.76351	0.0253305	0.651813
chr1_109825571_109826201	0.48927	5.36916	7.98813	0.0253774	0.651813
chr2_225866814_225867214	-5.35082	2.95336	7.52504	0.0253937	0.651813
chr4_49141461_49141820	2.16799	6.95626	6.67795	0.0254389	0.651813
chr8_8091346_8091596	-6.32846	3.58204	7.51592	0.025459	0.651813
chr7_123264676_123265061	-6.32501	3.58339	7.51148	0.0254908	0.651813
chr11_705897_706138	5.65574	3.12581	7.50338	0.0255491	0.651813
chr7_100201702_100202325	6.18223	3.47544	7.50281	0.0255532	0.651813
chr2_7171751_7172358	-0.401971	6.99482	6.66254	0.0255744	0.651813
chr5_93143683_93143877	5.62553	3.10503	7.49745	0.0255918	0.651813
chr12_71589274_71589527	5.57465	3.04848	7.49742	0.025592	0.651813
chr2_230665764_230666148	-5.3942	2.98167	7.49494	0.0256099	0.651813
chr6_14144941_14145121	-5.3942	2.98167	7.49494	0.0256099	0.651813
chr1_215125895_215126392	-6.36063	3.60213	7.49465	0.025612	0.651813
chr1_111090932_111091297	-6.31926	3.5758	7.49225	0.0256293	0.651813
chr3_141488462_141488700	-5.36869	2.96265	7.48742	0.0256643	0.651813
chr4_163085017_163085712	-0.452813	5.76635	6.64668	0.0257148	0.651813
chr14_41990964_41991410	-0.59504	4.94323	6.64328	0.025745	0.651813
chr12_85423144_85423503	-5.37591	2.96988	7.47541	0.0257514	0.651813
chr1_172074205_172074673	-5.38552	2.96949	7.47389	0.0257625	0.651813
chr18_36105_36442	-5.38552	2.96949	7.47389	0.0257625	0.651813
chr3_129062691_129063127	-5.38552	2.96949	7.47389	0.0257625	0.651813
chr8_123337032_123337589	-5.38552	2.96949	7.47389	0.0257625	0.651813
chr4_133084034_133084752	-5.39526	2.97758	7.4731	0.0257683	0.651813
chr8_69440930_69441263	6.17882	3.47049	7.47209	0.0257756	0.651813
chr1_180747761_180748354	-6.28773	3.55839	7.46829	0.0258032	0.651813
chr1_186649139_186649890	-0.41095	5.81739	7.84063	0.0258103	0.651813
chr11_83527613_83527948	-5.41154	2.99077	7.45832	0.0258761	0.651813
chr8_112152560_112153312	-0.464969	5.47103	7.78502	0.0258764	0.651813
chr6_126497527_126497699	-6.29295	3.55914	7.45661	0.0258886	0.651813
chr2_102090587_102091048	-5.38709	2.97453	7.45243	0.0259192	0.651813
chr5_67497694_67498183	-5.41048	2.99477	7.45228	0.0259203	0.651813
chr5_92571559_92572086	-5.41048	2.99477	7.45228	0.0259203	0.651813
chr12_85835685_85835902	6.24696	3.50047	7.4517	0.0259246	0.651813
chr12_66563077_66563955	-0.383438	6.2019	6.62233	0.0259321	0.651813
chr2_209685032_209685264	5.67102	3.13401	7.44779	0.0259532	0.651813
chr10_106258167_106258535	-5.41959	2.9938	7.44777	0.0259534	0.651813
chr14_65463952_65464307	-5.40298	2.9787	7.44596	0.0259667	0.651813
chr6_6928195_6928702	-5.40298	2.9787	7.44596	0.0259667	0.651813
chr13_111567108_111568163	-0.432159	5.78785	6.61839	0.0259675	0.651813
chr8_131761694_131762344	-0.395101	5.91877	6.61626	0.0259866	0.651813
chr2_61231491_61231750	5.68232	3.14016	7.43859	0.026021	0.651813
chr20_52237999_52238668	0.418165	6.92088	6.61158	0.0260287	0.651813
chr11_82569429_82570040	-5.39508	2.9691	7.43429	0.0260527	0.651813
chr6_67131445_67131930	-5.43557	3.00678	7.43003	0.0260841	0.651813
chr9_118355870_118356173	6.14847	3.44861	7.4295	0.026088	0.651813
chr11_61129273_61130149	0.713893	4.93113	6.60336	0.0261029	0.651813
chr1_172146830_172147315	-0.419594	5.81078	6.60212	0.0261142	0.651813
chr20_46413300_46415709	0.377743	6.69235	6.59918	0.0261407	0.651813
chr17_1627774_1628152	-5.4126	2.98674	7.42119	0.0261495	0.651813
chr1_116810801_116811123	-1.28205	4.87062	6.59666	0.0261636	0.651813
chr12_72148251_72149544	-0.997153	6.26002	6.59456	0.0261827	0.651813
chr18_21269203_21269802	5.64794	3.0987	7.41577	0.0261897	0.651813
chr10_16654287_16654694	-6.27451	3.54803	7.41483	0.0261967	0.651813
chr17_2868969_2869258	5.63998	3.08789	7.41199	0.0262179	0.651813
chr7_130352992_130354030	0.636948	5.19891	6.5892	0.0262314	0.651813
chr5_40797896_40798945	-0.520506	5.44664	6.58855	0.0262373	0.651813
chr2_9126871_9127068	-6.31691	3.56778	7.40937	0.0262373	0.651813
chr12_12972896_12973156	-5.4272	2.99494	7.40866	0.0262426	0.651813
chr2_33294967_33295383	-5.4272	2.99494	7.40866	0.0262426	0.651813
chr6_90372518_90372860	5.71299	3.16146	7.40515	0.0262688	0.651813
chr5_141257932_141258256	6.29707	3.52254	7.40266	0.0262874	0.651813
chr4_171709593_171710119	-6.26495	3.54168	7.4005	0.0263035	0.651813
chr2_182410748_182411098	-5.45243	3.01573	7.40026	0.0263053	0.651813
chr14_93439652_93440105	-6.25912	3.53939	7.3979	0.0263229	0.651813
chr14_60436097_60436464	0.582369	5.48186	6.57912	0.0263232	0.651813
chr6_50783351_50783596	-5.30883	2.90305	7.39663	0.0263324	0.651813
chr5_178487183_178487634	6.13744	3.44182	7.395	0.0263446	0.651813
chr6_142393052_142393675	-1.17959	5.05825	6.57611	0.0263507	0.651813
chr6_142528443_142528798	-6.25455	3.53699	7.39229	0.0263649	0.651813
chr9_gl000199_random_84290_84979	1.10253	6.67794	6.57335	0.0263759	0.651813
chr1_59249459_59250417	-0.41619	5.95009	6.57224	0.0263862	0.651813
chr3_160889543_160890066	-5.43489	3.00424	7.38907	0.0263891	0.651813
chr14_21098907_21099176	5.72583	3.16849	7.38834	0.0263945	0.651813
chr13_53725890_53726191	-5.44417	3.00399	7.38734	0.026402	0.651813
chr11_8742814_8743180	-5.46026	3.01873	7.38468	0.026422	0.651813
chr4_138148158_138148509	-6.27303	3.54668	7.38465	0.0264222	0.651813
chr3_101472141_101472868	-0.514917	5.20386	6.56756	0.026429	0.651813
chr3_101522078_101522417	-6.27477	3.5448	7.38272	0.0264367	0.651813
chr2_181612460_181613002	-5.43653	2.99465	7.38197	0.0264424	0.651813
chr4_125404437_125404873	-5.43653	2.99465	7.38197	0.0264424	0.651813
chr6_43691518_43691859	-5.35191	2.93464	7.3819	0.0264429	0.651813
chr4_152329748_152330672	-0.711816	5.9498	6.56443	0.0264578	0.651813
chr3_45883364_45883765	-5.45349	3.01185	7.37871	0.0264669	0.651813
chr4_ctg9_hap1_248826_249416	-5.45349	3.01185	7.37871	0.0264669	0.651813
chr7_23230727_23231141	-5.45349	3.01185	7.37871	0.0264669	0.651813
chr17_73717057_73717911	0.613495	5.2267	6.55608	0.0265346	0.651813
chr19_10812040_10812548	5.72955	3.17048	7.36595	0.0265632	0.651813
chr4_140222877_140223635	5.72955	3.17048	7.36595	0.0265632	0.651813
chr1_100431498_100431823	-5.47684	3.02763	7.36403	0.0265777	0.651813
chr12_3857555_3857946	-5.47684	3.02763	7.36403	0.0265777	0.651813
chr1_232814239_232814573	-5.47577	3.03142	7.36383	0.0265792	0.651813
chr1_243596316_243596973	-0.540031	5.50257	6.54876	0.0266023	0.651813
chr9_41936307_41936903	0.593979	5.18627	6.54745	0.0266143	0.651813
chr4_75172438_75172655	-6.25023	3.5313	7.35795	0.0266238	0.651813
chr22_42765149_42765513	6.26092	3.50028	7.35577	0.0266403	0.651813
chr17_58155486_58156970	-0.790256	7.29466	6.54398	0.0266465	0.651813
chr2_105048231_105048516	-5.46095	3.013	7.35259	0.0266645	0.651813
chr2_168975215_168975630	-5.46095	3.013	7.35259	0.0266645	0.651813
chr11_66405727_66406238	0.556222	5.32081	6.54093	0.0266748	0.651813
chr19_20958930_20959222	6.25963	3.49944	7.3501	0.0266834	0.651813
chr2_210073793_210074350	-5.45342	3.00375	7.34881	0.0266932	0.651813
chr19_56632519_56633105	0.664997	4.94592	6.53389	0.0267402	0.651813
chr5_167531910_167532394	-5.46768	3.01989	7.34213	0.0267441	0.651813
chr12_75904949_75905721	-0.472492	6.10313	6.53274	0.0267509	0.651813
chr1_228693497_228693934	-5.49217	3.04022	7.33975	0.0267623	0.651813
chr18_71707885_71708383	-6.25932	3.535	7.33875	0.0267699	0.651813
chr19_10230380_10230808	6.25834	3.49861	7.33647	0.0267873	0.651813
chr1_199065706_199066261	-0.656791	5.00891	6.52854	0.0267901	0.651813
chr6_131781147_131781504	-0.501065	5.44628	8.41008	0.0267959	0.651813
chr14_37593559_37594126	-5.4747	3.03517	7.33392	0.0268068	0.651813
chr1_150533550_150534414	0.535215	5.27702	6.52673	0.026807	0.651813
chr9_134000498_134001328	0.599261	5.04851	6.52597	0.0268141	0.651813
chr7_72475779_72476227	6.11318	3.42379	7.3322	0.02682	0.651813
chr2_133151456_133151772	5.76104	3.19226	7.33168	0.0268239	0.651813
chr12_66942304_66943008	-6.23972	3.5266	7.33144	0.0268258	0.651813
chr3_10636656_10636935	-3.0311	4.40136	6.52389	0.0268335	0.651813
chr2_233230213_233230730	-5.49324	3.03648	7.33013	0.0268358	0.651813
chr14_39277960_39278543	-5.46844	3.02214	7.3287	0.0268468	0.651813
chrY_10043005_10043147	6.14377	3.44262	7.3286	0.0268475	0.651813
chr2_23703903_23704189	-6.23123	3.52004	7.32831	0.0268498	0.651813
chrX_130811674_130811984	-5.47512	3.02895	7.32005	0.0269132	0.651813
chr19_2739976_2740245	5.78403	3.20508	7.31921	0.0269197	0.651813
chr9_gl000199_random_34320_34858	1.40599	8.77495	6.51456	0.0269208	0.651813
chr10_123861442_123861844	-5.44583	2.99437	7.31777	0.0269307	0.651813
chr11_51584703_51585009	1.05963	7.57617	6.51189	0.0269459	0.651813
chr14_40182878_40183203	5.78224	3.20411	7.31548	0.0269484	0.651813
chr8_127500433_127500657	-6.26195	3.53589	7.31461	0.026955	0.651813
chr8_86145543_86146042	-5.4845	3.03725	7.31346	0.0269639	0.651813
chr13_107001614_107002062	-5.45456	3.00793	7.31235	0.0269725	0.651813
chr11_2950738_2950981	5.80584	3.22144	7.30895	0.0269987	0.651813
chr19_37341624_37342000	5.80584	3.22144	7.30895	0.0269987	0.651813
chr12_123465350_123465656	5.8179	3.22823	7.30865	0.027001	0.651813
chr9_107850871_107851070	-6.22605	3.51601	7.30552	0.0270253	0.651813
chr10_8068887_8069256	-5.47755	3.02197	7.30542	0.027026	0.651813
chrX_129862000_129862514	-5.47755	3.02197	7.30542	0.027026	0.651813
chr5_96379864_96380205	-6.22138	3.51358	7.30538	0.0270263	0.651813
chr1_101009161_101009495	-6.22058	3.51534	7.30522	0.0270275	0.651813
chr14_52083727_52084014	-5.51593	3.05194	7.30505	0.0270288	0.651813
chr21_10780418_10780673	2.91455	5.91296	6.50164	0.0270424	0.651813
chr19_45972531_45973024	5.8264	3.23307	7.30285	0.0270459	0.651813
chr2_118899986_118900369	-5.49323	3.02865	7.30016	0.0270667	0.651813
chr14_34262006_34262138	5.79451	3.21097	7.30008	0.0270673	0.651813
chr19_44123655_44124157	5.82987	3.23499	7.29868	0.0270782	0.651813
chr9_30060623_30061063	5.79367	3.21463	7.2986	0.0270787	0.651813
chr4_170232939_170233086	-6.2403	3.52337	7.29824	0.0270815	0.651813
chr8_136627267_136627606	5.79545	3.2156	7.29645	0.0270954	0.651813
chr19_40023244_40023654	5.79273	3.21	7.29157	0.0271333	0.651813
chr3_146298900_146299262	5.79273	3.21	7.29157	0.0271333	0.651813
chr16_77694058_77694565	-5.50731	3.05265	7.29089	0.0271386	0.651813
chr1_100125154_100125725	-0.710017	4.86948	6.4908	0.0271449	0.651813
chr2_158192622_158193022	-6.21669	3.51115	7.28904	0.0271529	0.651813
chr2_92306730_92308114	1.03768	8.33916	6.48788	0.0271726	0.651813
chr6_26553779_26554566	5.8808	3.26807	7.28565	0.0271793	0.651813
chr5_140464129_140464583	5.83657	3.23886	7.28559	0.0271798	0.651813
chr10_133379769_133380029	-5.50945	3.04529	7.28396	0.0271925	0.651813
chr8_58970270_58970531	-5.50945	3.04529	7.28396	0.0271925	0.651813
chr10_106382170_106382657	5.78319	3.20877	7.28341	0.0271968	0.651813
chr12_26279016_26279216	5.80231	3.21952	7.28269	0.0272024	0.651813
chr6_26033473_26034257	6.10044	3.41603	7.27939	0.0272282	0.651813
chr6_146077196_146077704	-6.24799	3.52371	7.27862	0.0272342	0.651813
chr15_79152388_79152677	5.91248	3.29017	7.2783	0.0272367	0.651813
chr8_136865172_136865353	-5.5319	3.06065	7.27765	0.0272417	0.651813
chr10_72318953_72319318	-5.48589	3.01952	7.27724	0.0272449	0.651813
chrX_61691392_61692164	0.990031	6.84548	6.47872	0.0272597	0.651813
chr12_1771136_1771367	5.9237	3.29668	7.27403	0.02727	0.651813
chr6_123851076_123851288	5.9237	3.29668	7.27403	0.02727	0.651813
chr10_129595766_129595905	6.08485	3.40649	7.27274	0.0272801	0.651813
chr5_136352762_136352966	-6.21537	3.51129	7.27226	0.0272838	0.651813
chr1_108998939_108999600	-6.21226	3.50532	7.27175	0.0272879	0.651813
chr2_8573605_8573816	5.72509	3.14488	7.27078	0.0272955	0.651813
chr13_32884318_32884652	5.91412	3.2911	7.27067	0.0272963	0.651813
chr2_221547412_221547608	-5.50777	3.04656	7.27022	0.0272998	0.651813
chr7_121078365_121078837	-0.709878	5.37805	6.47393	0.0273054	0.651813
chr10_39124465_39124715	3.35772	4.99299	6.47217	0.0273222	0.651813
chr2_88337872_88338092	5.67868	3.11223	7.2672	0.0273235	0.651813
chr1_217536541_217537101	-5.51596	3.04428	7.26682	0.0273265	0.651813
chr9_80064160_80064911	-5.49766	3.05055	7.26583	0.0273343	0.651813
chr3_82266231_82266574	5.83485	3.23791	7.26577	0.0273347	0.651813
chr15_65321652_65322060	5.80844	3.21878	7.2648	0.0273423	0.651813
chr17_1546712_1547040	6.08922	3.40908	7.26425	0.0273466	0.651813
chr19_34745193_34745502	5.95286	3.31741	7.26413	0.0273476	0.651813
chr6_19333121_19333487	-5.51379	3.05921	7.26281	0.0273579	0.651813
chr17_40171974_40172271	5.89952	3.28271	7.26243	0.0273609	0.651813
chr12_100353443_100353680	-6.21829	3.50761	7.26217	0.0273629	0.651813
chr1_117209506_117209833	5.92532	3.29761	7.26177	0.0273661	0.651813
chr2_207188207_207188538	-6.22664	3.51272	7.25935	0.0273851	0.651813
chr19_34625267_34625635	5.96061	3.322	7.2569	0.0274043	0.651813
chr3_150623719_150624048	-5.52345	3.0549	7.25675	0.0274055	0.651813
chr2_121828753_121828989	-5.52335	3.06132	7.25643	0.027408	0.651813
chr2_176390433_176390788	-5.52335	3.06132	7.25643	0.027408	0.651813
chr17_27181896_27182253	5.94187	3.31098	7.25601	0.0274114	0.651813
chr17_43045624_43045879	5.97461	3.3302	7.256	0.0274115	0.651813
chr10_102295375_102295798	5.72861	3.14083	7.25288	0.027436	0.651813
chr4_119482823_119482991	-6.29928	3.54973	7.25208	0.0274423	0.651813
chr8_97422067_97422310	6.02074	3.36118	7.25092	0.0274515	0.651813
chr5_132946726_132946898	5.99214	3.34411	7.25071	0.0274531	0.651813
chr19_54666080_54666360	6.01331	3.3567	7.25016	0.0274575	0.651813
chr10_64314535_64314817	5.96989	3.32748	7.24679	0.027484	0.651813
chr9_727515_728047	-5.53297	3.05702	7.24599	0.0274904	0.651813
chr9_20551666_20552087	-5.53297	3.05702	7.24599	0.0274904	0.651813
chrX_89856681_89857232	-5.53297	3.05702	7.24599	0.0274904	0.651813
chr5_168278766_168279475	-0.447434	5.45628	6.86333	0.0274917	0.651813
chr15_46604449_46604774	6.051	3.3827	7.24455	0.0275018	0.651813
chrX_99826641_99827208	-6.20227	3.49879	7.2437	0.0275085	0.651813
chr1_151707574_151707768	6.02378	3.36296	7.23948	0.0275418	0.651813
chr16_83453965_83454244	-5.54769	3.06932	7.23929	0.0275433	0.651813
chr19_5622766_5623125	5.99294	3.3411	7.23639	0.0275664	0.651813
chr3_23559776_23560149	-5.55506	3.07226	7.23395	0.0275857	0.651813
chr3_112191897_112192294	-5.55506	3.07226	7.23395	0.0275857	0.651813
chr2_193365544_193366085	0.576246	5.60816	6.4443	0.0275899	0.651813
chr8_131663378_131663685	-5.52131	3.06214	7.22829	0.0276306	0.651813
chr1_121351917_121352428	1.11949	7.31987	6.43936	0.0276377	0.651813
chr3_146261854_146262775	-0.409439	6.20514	6.43849	0.0276462	0.651813
chr9_131495591_131495827	6.07555	3.39764	7.22563	0.0276518	0.651813
chrX_41241049_41241273	-5.54041	3.05998	7.22461	0.0276599	0.651813
chr14_93180999_93181320	-6.34638	3.57288	7.22343	0.0276693	0.651813
chr13_62932193_62932554	-6.2046	3.50659	7.22291	0.0276734	0.651813
chr1_148588694_148588930	-5.56953	3.08438	7.22282	0.0276741	0.651813
chr8_81478087_81478424	-5.56953	3.08438	7.22282	0.0276741	0.651813
chr1_196644095_196644458	5.94748	3.31056	7.2215	0.0276847	0.651813
chr9_103173806_103174417	-0.333919	6.36234	6.43273	0.027702	0.651813
chr21_27488738_27489265	-6.18661	3.4916	7.21715	0.0277193	0.651813
chr22_31644217_31644635	5.76155	3.16537	7.21713	0.0277195	0.651813
chr4_20811470_20811744	-5.56846	3.08786	7.21583	0.0277299	0.651813
chr4_26460739_26461253	-5.56846	3.08786	7.21583	0.0277299	0.651813
chr7_115762940_115763527	-5.56846	3.08786	7.21583	0.0277299	0.651813
chr10_32542303_32542985	-5.54777	3.06183	7.21571	0.0277309	0.651813
chr13_24040579_24041023	-5.54777	3.06183	7.21571	0.0277309	0.651813
chr7_113895401_113895968	-5.54777	3.06183	7.21571	0.0277309	0.651813
chr7_143317057_143318371	-0.373178	6.95269	6.42608	0.0277667	0.651813
chr2_13071286_13071614	-6.2068	3.49968	7.21063	0.0277715	0.651813
chr17_13085935_13086474	-5.54604	3.07052	7.21047	0.0277727	0.651813
chr7_99517001_99517364	-5.54535	3.0684	7.20864	0.0277874	0.651813
chr15_27846735_27846941	-5.55474	3.07053	7.2084	0.0277893	0.651813
chr8_21299047_21299313	-5.55406	3.0684	7.20679	0.0278022	0.651813
chr8_71580728_71581781	0.456881	5.81922	6.88029	0.0278185	0.651813
chr3_67361940_67362150	-5.57061	3.08088	7.2027	0.027835	0.651813
chr2_176569053_176569564	-5.561	3.07702	7.20114	0.0278475	0.651813
chr3_4149139_4149412	-5.561	3.07702	7.20114	0.0278475	0.651813
chr6_39329822_39330204	-5.561	3.07702	7.20114	0.0278475	0.651813
chrUn_gl000225_101557_101899	0.646109	6.81006	6.41664	0.0278589	0.651813
chr6_167040417_167041529	-0.627722	5.44499	6.41594	0.0278657	0.651813
chr14_39440549_39440892	-6.18344	3.48548	7.19817	0.0278714	0.651813
chr15_69745001_69745399	6.04451	3.37542	7.19777	0.0278746	0.651813
chr19_50879554_50880547	-5.55613	3.06869	7.19478	0.0278987	0.651813
chr22_16861621_16861858	1.95617	6.56992	6.41252	0.0278992	0.651813
chr18_74237239_74237536	-5.57679	3.0873	7.19433	0.0279023	0.651813
chrX_31297518_31297807	-5.57679	3.0873	7.19433	0.0279023	0.651813
chr11_33824058_33824500	-5.56964	3.07705	7.19274	0.0279151	0.651813
chr7_3668210_3668607	-5.58385	3.09634	7.1917	0.0279234	0.651813
chr6_20454656_20455020	-5.49493	3.01933	7.18899	0.0279453	0.651813
chr1_207414148_207414524	5.78118	3.18241	7.18808	0.0279526	0.651813
chr17_33288412_33288617	5.78118	3.18241	7.18808	0.0279526	0.651813
chr10_6244489_6245543	-0.557329	5.21425	6.40626	0.0279606	0.651813
chr5_61917197_61917392	-6.17644	3.48503	7.18614	0.0279683	0.651813
chr4_70105329_70105756	5.79224	3.18765	7.18364	0.0279885	0.651813
chr7_94205526_94205895	6.0251	3.36388	7.18194	0.0280022	0.651813
chr4_79232589_79232833	-5.59211	3.09583	7.18079	0.0280115	0.651813
chr9_34665679_34666172	-5.59211	3.09583	7.18079	0.0280115	0.651813
chr6_131445506_131445916	-6.17325	3.47887	7.17845	0.0280305	0.651813
chr7_77420491_77420944	-5.57787	3.08382	7.1757	0.0280528	0.651813
chr8_109092588_109093098	-0.401492	6.29655	6.39611	0.0280605	0.651813
chr2_187172605_187172859	-5.5679	3.08554	7.17115	0.0280896	0.651813
chr3_191412886_191413547	5.76836	3.16955	7.17067	0.0280935	0.651813
chr11_71192504_71192895	-5.58505	3.08566	7.16705	0.028123	0.651813
chr5_14685898_14686101	-5.6062	3.10768	7.16677	0.0281252	0.651813
chr5_7904355_7904603	-6.19575	3.49891	7.16107	0.0281716	0.651813
chrUn_gl000216_22127_22635	3.46102	6.11853	6.38388	0.0281814	0.651813
chr11_18743276_18743836	-5.59908	3.10479	7.1596	0.0281836	0.651813
chr11_114050002_114050385	-5.59908	3.10479	7.1596	0.0281836	0.651813
chr1_217804054_217804974	-0.371007	6.66429	6.38362	0.028184	0.651813
chr6_5085316_5085813	-5.59182	3.09414	7.15566	0.0282158	0.651813
chr9_75746992_75747581	-5.59182	3.09414	7.15566	0.0282158	0.651813
chr8_131077536_131077873	-5.60513	3.11103	7.15397	0.0282296	0.651813
chr7_132766371_132767149	-0.408477	6.51158	6.37787	0.028241	0.651813
chr1_105680159_105680489	-6.1662	3.47844	7.15117	0.0282524	0.651813
chr3_36946268_36946450	-6.1662	3.47844	7.15117	0.0282524	0.651813
chr8_121464991_121465579	-5.5833	3.09405	7.15033	0.0282593	0.651813
chr8_98307756_98308421	-6.1827	3.48222	7.14996	0.0282623	0.651813
chr12_84404935_84405672	-5.60016	3.1014	7.14963	0.028265	0.651813
chr11_123431801_123432056	-6.16132	3.47598	7.14941	0.0282668	0.651813
chr10_55678602_55678801	-6.1851	3.48178	7.14827	0.0282761	0.651813
chr3_161269491_161269751	5.84997	3.2252	7.14819	0.0282768	0.651813
chr22_39916098_39916557	5.83284	3.2209	7.14702	0.0282863	0.651813
chr12_132072878_132073212	3.0018	4.42243	6.37317	0.0282878	0.651813
chr17_70403297_70404035	-5.59117	3.09207	7.14637	0.0282917	0.651813
chr1_117525249_117525558	-5.51795	3.02937	7.14564	0.0282977	0.651813
chr17_1018481_1018799	5.89519	3.26136	7.14394	0.0283116	0.651813
chr13_37083615_37083806	-6.16383	3.47034	7.14271	0.0283217	0.651813
chr1_183129130_183129648	-0.375358	6.29238	6.36874	0.028332	0.651813
chr2_171092460_171092640	-5.62121	3.11608	7.14017	0.0283426	0.651813
chr7_100743510_100743769	-5.59801	3.10815	7.13945	0.0283485	0.651813
chr2_16900207_16900642	-5.5979	3.10048	7.13869	0.0283547	0.651813
chr2_45902629_45902931	-5.5979	3.10048	7.13869	0.0283547	0.651813
chr2_18616828_18617116	-5.62014	3.11939	7.13392	0.0283939	0.651813
chr4_112551792_112552108	-5.62014	3.11939	7.13392	0.0283939	0.651813
chr7_76052680_76053084	-5.62014	3.11939	7.13392	0.0283939	0.651813
chrUn_gl000216_154332_154918	0.680463	7.27835	6.36172	0.0284021	0.651813
chr13_77773198_77773708	-5.59819	3.10215	7.13217	0.0284083	0.651813
chr8_10538527_10538762	-6.2564	3.52084	7.12816	0.0284413	0.651813
chr18_3511969_3512377	-5.61221	3.11392	7.12759	0.0284461	0.651813
chr19_10806355_10806652	6.11623	3.40878	7.12676	0.0284529	0.651813
chr9_78203825_78204158	-5.62823	3.11897	7.12643	0.0284556	0.651813
chr1_232758220_232758844	-5.613	3.10892	7.12449	0.0284717	0.651813
chr3_169625233_169626127	-5.613	3.10892	7.12449	0.0284717	0.651813
chr5_135760624_135760835	-1.76529	4.8449	6.35414	0.0284781	0.651813
chr8_122101380_122101862	-5.62228	3.11275	7.12018	0.0285073	0.651813
chr12_119474661_119475277	-5.61416	3.1132	7.12002	0.0285085	0.651813
chr1_116524024_116524373	-6.19065	3.49082	7.11994	0.0285092	0.651813
chr20_49776897_49777470	-6.18415	3.47756	7.11902	0.0285168	0.651813
chr7_152759091_152759299	-6.2666	3.52472	7.11892	0.0285177	0.651813
chr3_23782580_23782933	-6.15756	3.46805	7.1147	0.0285526	0.651813
chr9_42250869_42251676	5.95059	3.29786	7.11159	0.0285784	0.651813
chr8_108901581_108901851	-5.61477	3.10069	7.11096	0.0285837	0.651813
chr4_96493551_96494050	-5.64194	3.13058	7.11033	0.0285889	0.651813
chr8_59553953_59554263	-5.64194	3.13058	7.11033	0.0285889	0.651813
chr4_119199354_119200305	-0.381112	6.33384	6.3421	0.0285993	0.651813
chr7_114303695_114303856	-6.17434	3.4722	7.10729	0.0286141	0.651813
chr14_93725282_93725716	6.06399	3.37315	7.10689	0.0286174	0.651813
chr9_124261682_124262159	6.06399	3.37315	7.10689	0.0286174	0.651813
chr12_68318970_68319611	-5.63499	3.12771	7.10651	0.0286206	0.651813
chr2_37898531_37899113	-5.63607	3.12444	7.10519	0.0286316	0.651813
chr4_92899558_92899909	-5.60123	3.09799	7.10519	0.0286316	0.651813
chr12_65196122_65196438	-5.62795	3.11733	7.1017	0.0286606	0.651813
chr19_1275565_1275865	5.96665	3.31142	7.09931	0.0286805	0.651813
chr2_184574628_184574848	-6.14279	3.4606	7.09857	0.0286867	0.651813
chr1_168876181_168876918	-0.453498	5.5798	9.05029	0.0287055	0.651813
chr12_79515372_79515548	-6.24774	3.51341	7.09604	0.0287078	0.651813
chr2_143080879_143081050	-5.55502	3.0577	7.09581	0.0287097	0.651813
chrX_111490892_111491211	-5.55502	3.0577	7.09581	0.0287097	0.651813
chr12_18008524_18008725	5.9973	3.32518	7.09567	0.0287108	0.651813
chr14_51349779_51350187	-6.14224	3.45887	7.09564	0.0287111	0.651813
chr6_134438537_134439027	-6.14139	3.46079	7.09374	0.028727	0.651813
chr2_47103991_47104335	-5.64087	3.13381	7.09288	0.0287342	0.651813
chr4_22131160_22131381	6.02695	3.34193	7.09193	0.0287421	0.651813
chr8_9807375_9807712	-6.13814	3.45445	7.09181	0.0287432	0.651813
chr10_13889316_13889686	-6.18017	3.47319	7.09096	0.0287502	0.651813
chrX_47441632_47441834	-5.61961	3.11717	7.09042	0.0287547	0.651813
chrX_113960358_113960783	-5.61961	3.11717	7.09042	0.0287547	0.651813
chr12_21401384_21401878	-5.54845	3.05036	7.08761	0.0287782	0.651813
chr21_43783364_43783726	-6.16409	3.4655	7.08714	0.0287822	0.651813
chr10_35103897_35104757	6.10574	3.40324	7.08629	0.0287893	0.651813
chr7_127671920_127672276	-5.63626	3.11749	7.08602	0.0287915	0.651813
chr1_242011085_242011861	-0.42054	6.23514	6.32282	0.0287946	0.651813
chr7_28961454_28961637	-6.15925	3.46423	7.085	0.0288001	0.651813
chr12_15334694_15334914	-6.15489	3.46347	7.08387	0.0288095	0.651813
chr17_66610052_66610340	-6.15857	3.46585	7.08193	0.0288258	0.651813
chr20_58090587_58090982	-0.44532	5.68198	6.31972	0.0288262	0.651813
chr1_25573845_25574315	5.90849	3.25856	7.08185	0.0288266	0.651813
chr9_15552410_15553547	-0.587984	5.56559	6.31861	0.0288375	0.651813
chr12_61665880_61666491	-5.64409	3.12404	7.07911	0.0288495	0.651813
chr8_108134619_108135018	-5.64409	3.12404	7.07911	0.0288495	0.651813
chr4_22893378_22893786	-5.64886	3.13344	7.07726	0.028865	0.651813
chr2_45446205_45446556	-6.139	3.45251	7.07675	0.0288694	0.651813
chr13_105426135_105426444	-5.63714	3.12115	7.0746	0.0288874	0.651813
chr1_183022053_183022223	-5.6497	3.13599	7.07232	0.0289066	0.651813
chr4_121869545_121869851	-5.66344	3.14171	7.07168	0.028912	0.651813
chr5_130341489_130341942	-6.1552	3.45981	7.06987	0.0289272	0.651813
chr20_47131507_47132920	0.489782	8.00846	6.30926	0.028933	0.651813
chr1_215606063_215606481	-5.62336	3.10939	7.06863	0.0289377	0.651813
chr11_88217918_88218399	-0.726565	4.82518	6.30843	0.0289415	0.651813
chr4_123031398_123031844	-6.24298	3.51057	7.06601	0.0289597	0.651813
chr6_97842138_97842305	-6.12762	3.4477	7.06581	0.0289615	0.651813
chr1_211581041_211581425	-6.15414	3.46011	7.0658	0.0289615	0.651813
chr12_68337204_68337505	-5.6568	3.13204	7.06399	0.0289768	0.651813
chr4_144452533_144452785	-5.6568	3.13204	7.06399	0.0289768	0.651813
chr7_103699412_103700046	-5.6568	3.13204	7.06399	0.0289768	0.651813
chr9_4077527_4077759	-5.6568	3.13204	7.06399	0.0289768	0.651813
chr6_151007124_151007313	-6.14783	3.4578	7.06151	0.0289978	0.651813
chrX_33355031_33355283	6.13564	3.41475	7.06117	0.0290006	0.651813
chr2_7037193_7037677	-5.66452	3.1385	7.0603	0.029008	0.651813
chr20_9947768_9948096	-5.62315	3.1008	7.05855	0.0290228	0.651813
chr7_32473111_32473309	-5.67109	3.14708	7.05854	0.0290228	0.651813
chrX_129158178_129158443	-5.67109	3.14708	7.05854	0.0290228	0.651813
chr8_96378706_96379107	-6.12261	3.4452	7.0584	0.0290241	0.651813
chr16_67313138_67313462	-5.67788	3.14993	7.05607	0.0290438	0.651813
chr7_32643720_32644093	-5.67681	3.15307	7.05412	0.0290603	0.651813
chr8_8023187_8023487	-5.67681	3.15307	7.05412	0.0290603	0.651813
chr2_192510878_192511152	-5.67002	3.15024	7.05301	0.0290697	0.651813
chr19_11750447_11750751	6.08049	3.39109	7.05249	0.0290741	0.651813
chr15_79673457_79673761	-6.12817	3.44946	7.04868	0.0291065	0.651813
chr5_156718355_156718605	6.13424	3.41387	7.04851	0.0291079	0.651813
chr11_18824236_18824564	-5.62911	3.10715	7.04837	0.0291091	0.651813
chr1_68018089_68018401	-6.12347	3.44323	7.04796	0.0291125	0.651813
chr2_182885474_182885806	-5.65101	3.12693	7.04784	0.0291136	0.651813
chr1_90081590_90081740	-6.12731	3.45141	7.04638	0.029126	0.651813
chr12_63193019_63193318	-6.13777	3.45241	7.04391	0.029147	0.651813
chr3_102939015_102939750	-5.67132	3.14035	7.03903	0.0291886	0.651813
chr8_143528849_143529213	-6.12903	3.4475	7.03675	0.029208	0.651813
chr1_49162761_49163203	-5.69111	3.16122	7.03595	0.0292148	0.651813
chr13_107721842_107722116	-5.64921	3.1338	7.03578	0.0292163	0.651813
chr6_117293204_117293374	-6.11702	3.44093	7.03551	0.0292186	0.651813
chr5_23332843_23333010	-6.1111	3.44041	7.03201	0.0292484	0.651813
chr2_63841530_63842490	-5.61651	3.10041	7.02962	0.0292689	0.651813
chr3_61992841_61993746	0.382353	6.34233	6.27515	0.0292846	0.651813
chr17_26988983_26989526	5.97542	3.30549	7.02772	0.0292851	0.651813
chr6_12957549_12958170	-5.66559	3.13527	7.02742	0.0292877	0.651813
chr6_36514840_36515345	5.99914	3.31882	7.02565	0.0293029	0.651813
chr5_31638834_31639513	0.537721	5.35557	6.27322	0.0293046	0.651813
chr19_11924850_11925255	5.87244	3.22892	7.02373	0.0293193	0.651813
chr7_63360600_63361686	0.516294	5.18104	6.26974	0.0293408	0.651813
chr5_109323618_109324278	-5.65859	3.12407	7.02111	0.0293418	0.651813
chr22_31090283_31090550	5.94577	3.28249	7.02108	0.029342	0.651813
chr1_218329915_218330406	-0.437032	5.6538	6.26892	0.0293494	0.651813
chr4_113686648_113687061	-6.13435	3.44628	7.01991	0.029352	0.651813
chr1_79698545_79698916	-5.68358	3.15591	7.01958	0.0293549	0.651813
chr15_55920014_55920171	-5.69005	3.16431	7.01953	0.0293553	0.651813
chr15_90638731_90639096	-5.69005	3.16431	7.01953	0.0293553	0.651813
chr2_176147025_176147327	-6.10691	3.43591	7.01728	0.0293746	0.651813
chr1_220804663_220805074	-5.66895	3.14615	7.01647	0.0293815	0.651813
chr19_32836498_32836750	-5.50628	3.01219	7.01431	0.0294001	0.651813
chr10_63510686_63511070	-6.11373	3.43442	7.00957	0.0294409	0.651813
chr2_103188116_103188804	-6.11877	3.43695	7.0077	0.0294571	0.651813
chr15_100889945_100891230	-0.639365	5.18339	6.25748	0.0294687	0.651813
chr6_82605390_82605694	-5.67942	3.14059	7.00555	0.0294756	0.651813
chr1_73957427_73957612	-5.71191	3.17216	7.00524	0.0294783	0.651813
chr12_101539811_101540590	-5.71191	3.17216	7.00524	0.0294783	0.651813
chr3_127509848_127510623	-5.71191	3.17216	7.00524	0.0294783	0.651813
chr6_155506716_155507044	-5.68251	3.15902	7.00425	0.0294868	0.651813
chr22_45705428_45705933	6.07081	3.37154	7.00408	0.0294883	0.651813
chr8_59147038_59147916	-6.10215	3.4296	7.00335	0.0294946	0.651813
chr13_80813807_80814241	-5.68571	3.14962	7.00227	0.029504	0.651813
chr1_240815830_240816560	-5.70421	3.17238	6.99969	0.0295262	0.651813
chrUn_gl000225_45963_46193	0.521443	6.86012	6.24979	0.0295494	0.651813
chr1_249200165_249201166	-0.396281	6.18297	6.24775	0.0295708	0.651813
chr18_76760027_76760216	-5.71298	3.1691	6.99367	0.0295784	0.651813
chr2_91672064_91672318	-6.20547	3.48111	6.99319	0.0295825	0.651813
chr15_75074285_75074722	6.02009	3.33661	6.99319	0.0295825	0.651813
chr2_192900469_192900994	-5.69757	3.1625	6.99318	0.0295826	0.651813
chr5_61601599_61602703	-0.472679	5.62016	6.24601	0.0295891	0.651813
chr11_57267120_57267305	5.97068	3.30269	6.99208	0.0295921	0.651813
chr3_174202107_174202557	-6.12522	3.43925	6.9912	0.0295997	0.651813
chr3_169342370_169342780	-6.13522	3.4443	6.98872	0.0296213	0.651813
chr7_29649373_29649814	-5.69861	3.16651	6.98796	0.0296279	0.651813
chr13_113808049_113808318	-5.67311	3.13247	6.98776	0.0296296	0.651813
chr10_126552802_126553202	-6.09951	3.43562	6.9869	0.0296371	0.651813
chr10_13116922_13117080	6.04096	3.3425	6.9866	0.0296397	0.651813
chr6_152540029_152540314	-6.14487	3.44712	6.98459	0.0296571	0.651813
chr3_183003666_183004007	-5.72482	3.18322	6.98382	0.0296638	0.651813
chr8_19986407_19986699	-5.72482	3.18322	6.98382	0.0296638	0.651813
chr1_153028703_153029000	-6.13517	3.44303	6.98359	0.0296658	0.651813
chr6_85259697_85259970	-6.11856	3.43526	6.98324	0.0296689	0.651813
chr18_1521671_1522261	-6.09047	3.42478	6.97698	0.0297234	0.651813
chr3_65433086_65433491	-5.6367	3.10545	6.97664	0.0297264	0.651813
chr16_80982860_80983115	-5.63779	3.10202	6.97606	0.0297314	0.651813
chr17_30263778_30264248	-5.63779	3.10202	6.97606	0.0297314	0.651813
chr7_93906116_93906609	-5.63779	3.10202	6.97606	0.0297314	0.651813
chr12_80663803_80664175	-6.08622	3.42021	6.97289	0.0297591	0.651813
chr3_157485438_157485861	-6.08622	3.42021	6.97289	0.0297591	0.651813
chr17_71502592_71503382	-6.08532	3.42226	6.97223	0.0297649	0.651813
chr7_43494661_43494888	-5.71168	3.17062	6.97111	0.0297747	0.651813
chr8_2308366_2308763	-6.08958	3.42681	6.96987	0.0297855	0.651813
chr12_48152720_48153069	6.09654	3.3921	6.96905	0.0297927	0.651813
chr7_16256043_16256596	-5.71112	3.16872	6.96833	0.029799	0.651813
chr14_22239784_22240149	-6.09103	3.42658	6.96757	0.0298057	0.651813
chr3_40220529_40220732	-5.72694	3.1772	6.96663	0.0298139	0.651813
chr14_96661481_96662007	-5.71348	3.16311	6.96627	0.029817	0.651813
chr2_28906106_28906559	-5.72376	3.1862	6.96375	0.0298391	0.651813
chr10_81604_82147	-5.71958	3.17095	6.96287	0.0298468	0.651813
chr3_167466207_167466524	-5.71958	3.17095	6.96287	0.0298468	0.651813
chr10_67598610_67598931	-5.73243	3.18303	6.96252	0.0298499	0.651813
chr1_111534930_111535397	-5.71903	3.16905	6.96174	0.0298567	0.651813
chr7_156442856_156443222	-5.71903	3.16905	6.96174	0.0298567	0.651813
chr18_77139069_77139266	-5.7251	3.17682	6.95915	0.0298795	0.651813
chr5_146239931_146240306	-5.75882	3.20196	6.95818	0.0298879	0.651813
chr12_17857873_17858378	-5.73972	3.18825	6.95783	0.029891	0.651813
chr13_23733954_23734640	-5.73972	3.18825	6.95783	0.029891	0.651813
chr13_90393500_90393995	-5.70318	3.1684	6.95737	0.0298951	0.651813
chr11_109568056_109568221	-5.7441	3.19694	6.95524	0.0299138	0.651813
chrUn_gl000216_80626_80875	2.6479	5.71774	6.21459	0.0299216	0.651813
chr3_183197874_183198364	-5.645	3.10558	6.95253	0.0299376	0.651813
chr16_30389119_30390035	0.507241	5.23612	6.21233	0.0299457	0.651813
chr1_186798005_186798256	-5.75238	3.19917	6.95006	0.0299593	0.651813
chr12_3862048_3862571	-5.75238	3.19917	6.95006	0.0299593	0.651813
chr5_119105419_119106064	-5.74621	3.19105	6.94946	0.0299647	0.651813
chr3_40518537_40518902	-5.73031	3.18899	6.94882	0.0299703	0.651813
chr2_171217841_171218093	-5.79102	3.22334	6.94855	0.0299727	0.651813
chr6_73831388_73831717	-5.77766	3.2155	6.94801	0.0299774	0.651813
chr2_20212008_20212638	-5.71292	3.16119	6.94769	0.0299802	0.651813
chr4_73075488_73076198	-5.71292	3.16119	6.94769	0.0299802	0.651813
chr1_94261489_94262039	-5.73294	3.17717	6.94752	0.0299818	0.651813
chrX_49680145_49680458	-5.63887	3.09855	6.94727	0.0299839	0.651813
chr3_8783286_8783577	-6.07531	3.41332	6.94725	0.0299841	0.651813
chr3_186937920_186938343	-6.07531	3.41332	6.94725	0.0299841	0.651813
chr3_38847265_38847568	-6.08195	3.41562	6.94574	0.0299974	0.651813
chr2_35843_36274	-0.432251	6.01686	6.20646	0.0300084	0.651813
chr5_24233132_24233454	-5.72565	3.17869	6.94299	0.0300217	0.651813
chrX_104928361_104928905	-5.73895	3.18488	6.94228	0.030028	0.651813
chr22_35078800_35079005	-5.77871	3.21265	6.94168	0.0300333	0.651813
chr1_229850771_229850985	-5.75987	3.19904	6.94119	0.0300376	0.651813
chr9_110099272_110099532	-6.18636	3.4661	6.94056	0.0300432	0.651813
chr6_167120650_167120828	-5.76418	3.20763	6.94008	0.0300474	0.651813
chr1_226320739_226321134	-5.77663	3.21833	6.93927	0.0300546	0.651813
chr7_105400668_105401038	-5.82252	3.24437	6.93832	0.030063	0.651813
chr8_15559602_15560401	-5.82252	3.24437	6.93832	0.030063	0.651813
chrX_28225005_28225512	-5.7269	3.16937	6.93724	0.0300726	0.651813
chr2_169988453_169988706	-6.1155	3.43038	6.93689	0.0300757	0.651813
chr16_46388312_46388500	3.48643	6.27808	6.19959	0.030082	0.651813
chr12_86658240_86659332	-0.502452	5.69339	6.19942	0.0300838	0.651813
chrX_7109794_7110128	-5.80945	3.23665	6.9352	0.0300906	0.651813
chr1_79696549_79696808	-5.75343	3.19624	6.9333	0.0301074	0.651813
chr1_85240649_85241251	-5.81048	3.23389	6.9329	0.030111	0.651813
chr4_184425298_184426146	-6.09098	3.42062	6.93258	0.0301138	0.651813
chr2_19036286_19036597	-6.0814	3.41379	6.93187	0.0301201	0.651813
chr2_164971538_164971706	-6.0814	3.41379	6.93187	0.0301201	0.651813
chr8_134520017_134520473	-5.82355	3.24164	6.93163	0.0301223	0.651813
chr6_37759119_37759498	0.852565	4.86382	6.19543	0.0301266	0.651813
chr1_74818198_74818887	-5.58297	3.06415	6.93076	0.03013	0.651813
chr11_24794950_24795220	-6.18139	3.46318	6.9305	0.0301323	0.651813
chr6_130634387_130634673	-6.07102	3.4087	6.92962	0.0301401	0.651813
chr13_99097522_99097820	-5.79802	3.22838	6.92734	0.0301603	0.651813
chr2_16432182_16432559	-5.86603	3.27266	6.92732	0.0301605	0.651813
chr6_24389496_24389826	-5.7973	3.2261	6.92655	0.0301674	0.651813
chr15_49267984_49268296	-5.84731	3.26237	6.92623	0.0301702	0.651813
chr3_31766159_31766501	-5.84731	3.26237	6.92623	0.0301702	0.651813
chr9_88881623_88881855	-5.84731	3.26237	6.92623	0.0301702	0.651813
chr8_94003154_94003717	-5.75163	3.1968	6.92551	0.0301766	0.651813
chr4_114546570_114546946	-5.80529	3.22835	6.92523	0.030179	0.651813
chr2_159095832_159096032	-5.85436	3.26244	6.92517	0.0301796	0.651813
chr9_80782374_80782744	-5.74673	3.18525	6.92489	0.0301821	0.651813
chr12_88692457_88692891	-5.74493	3.19251	6.92428	0.0301875	0.651813
chr1_248056873_248057218	-6.07712	3.40915	6.92201	0.0302077	0.651813
chr6_27342782_27343153	-6.07712	3.40915	6.92201	0.0302077	0.651813
chr1_189543495_189543984	-5.77161	3.20659	6.92146	0.0302126	0.651813
chr3_96954416_96954952	-5.77161	3.20659	6.92146	0.0302126	0.651813
chr5_119517100_119517702	-5.77161	3.20659	6.92146	0.0302126	0.651813
chr10_56616620_56617314	-5.89594	3.29294	6.91924	0.0302324	0.651813
chr17_9832110_9832465	-5.65873	3.11834	6.91845	0.0302394	0.651813
chr14_23541008_23541392	-5.88451	3.28291	6.91819	0.0302418	0.651813
chr5_36696237_36696546	-5.88451	3.28291	6.91819	0.0302418	0.651813
chr11_33651638_33652289	-5.88352	3.28546	6.91743	0.0302485	0.651813
chr1_243507353_243507645	-5.8776	3.28277	6.91734	0.0302493	0.651813
chr7_33131518_33131940	-6.09294	3.41691	6.91718	0.0302507	0.651813
chr1_165687268_165687618	-5.74076	3.17752	6.91627	0.0302588	0.651813
chr20_25177029_25177502	-5.81151	3.23111	6.91594	0.0302618	0.651813
chr6_133361225_133361440	-5.81151	3.23111	6.91594	0.0302618	0.651813
chr7_362006_362552	-5.90825	3.30039	6.91588	0.0302624	0.651813
chr2_134965182_134965623	-5.7586	3.20047	6.91375	0.0302813	0.651813
chr17_60188394_60190355	0.44596	5.54243	8.69682	0.0302849	0.651813
chr7_17247808_17248141	-5.57588	3.05459	6.91212	0.0302959	0.651813
chr16_33874012_33874326	3.16768	5.20908	6.17947	0.0302987	0.651813
chr1_201011988_201012488	-5.91405	3.30306	6.91098	0.0303061	0.651813
chr1_150293615_150294378	0.536784	5.10379	6.20582	0.0303092	0.651813
chr1_39957078_39957500	-5.77923	3.20702	6.91056	0.0303099	0.651813
chr2_40699052_40699322	-5.79905	3.22558	6.91038	0.0303115	0.651813
chr5_39692069_39692389	-5.75035	3.19824	6.9101	0.0303139	0.651813
chrX_103286874_103287342	-5.87099	3.27794	6.90986	0.0303161	0.651813
chr2_136972025_136972807	-5.8463	3.265	6.90919	0.0303221	0.651813
chr1_173496226_173496573	-5.73456	3.17699	6.90881	0.0303255	0.651813
chr6_19247056_19247697	-5.90924	3.2979	6.90851	0.0303281	0.651813
chr18_45529283_45529659	-5.74953	3.20263	6.90834	0.0303297	0.651813
chr17_80544085_80544410	0.986807	5.46115	6.17652	0.0303306	0.651813
chr12_31388127_31388555	-5.83954	3.26011	6.90816	0.0303313	0.651813
chr2_31084956_31085230	-5.85537	3.25978	6.90793	0.0303334	0.651813
chr4_173959390_173959958	-5.85537	3.25978	6.90793	0.0303334	0.651813
chr11_59633790_59634109	-5.7903	3.22011	6.90737	0.0303383	0.651813
chr5_169847922_169848111	-5.91307	3.30553	6.90725	0.0303394	0.651813
chr8_117924959_117925333	-5.95492	3.33022	6.90674	0.030344	0.651813
chr1_120125548_120125863	-5.67995	3.1289	6.90672	0.0303442	0.651813
chr3_164985859_164986203	-5.81841	3.23614	6.90624	0.0303485	0.651813
chr18_73879396_73879680	-5.76628	3.20088	6.90624	0.0303485	0.651813
chr6_593249_593598	-5.76702	3.20419	6.90575	0.0303529	0.651813
chrX_132549171_132550027	-5.873	3.27276	6.90574	0.0303529	0.651813
chr7_2191477_2191681	-5.79783	3.22058	6.90566	0.0303537	0.651813
chr3_192507192_192507435	-5.88551	3.28034	6.90561	0.0303541	0.651813
chr2_6493100_6493466	-6.23942	3.49714	6.90508	0.0303588	0.651813
chr18_68265951_68266500	-5.96579	3.33984	6.90455	0.0303637	0.651813
chr1_178279864_178280252	-5.91949	3.31026	6.90413	0.0303674	0.651813
chr9_78795880_78796193	-5.85904	3.27256	6.9037	0.0303712	0.651813
chr1_170032260_170032551	-5.95395	3.33259	6.9034	0.0303739	0.651813
chr1_101134041_101134565	-6.12618	3.43117	6.90254	0.0303816	0.651813
chr7_18385371_18385575	-5.91504	3.30057	6.90239	0.030383	0.651813
chr3_112994764_112995120	-6.06954	3.40895	6.90229	0.0303839	0.651813
chr1_166871462_166871731	-5.99466	3.35687	6.9021	0.0303856	0.651813
chr16_12130926_12131188	-6.09913	3.41781	6.90203	0.0303862	0.651813
chr6_134700259_134700627	-0.566381	5.28788	6.1705	0.0303959	0.651813
chr5_38922350_38922661	-5.93634	3.32267	6.89987	0.0304056	0.651813
chr2_14928969_14929331	-5.90244	3.29772	6.89955	0.0304084	0.651813
chr6_118032633_118032815	-5.99371	3.35914	6.89913	0.0304122	0.651813
chr5_158891029_158891290	-6.08209	3.40997	6.89899	0.0304135	0.651813
chr2_214085822_214086156	-5.89793	3.28788	6.89868	0.0304163	0.651813
chr12_78945431_78945693	-5.94397	3.3205	6.89866	0.0304165	0.651813
chrX_138641913_138642102	-6.00522	3.36627	6.8981	0.0304215	0.651813
chr2_69792535_69792878	-5.95589	3.32784	6.89783	0.0304239	0.651813
chr8_134403259_134403476	-5.95589	3.32784	6.89783	0.0304239	0.651813
chr2_2137784_2138095	-6.09874	3.41639	6.89782	0.030424	0.651813
chr2_37641499_37641879	-5.77693	3.21225	6.89765	0.0304255	0.651813
chr4_31047345_31047791	-6.01065	3.36886	6.89739	0.0304279	0.651813
chr15_86380381_86380643	-5.95025	3.3252	6.89697	0.0304316	0.651813
chr9_137594873_137595249	-5.95025	3.3252	6.89697	0.0304316	0.651813
chr16_87236727_87237064	-5.97136	3.34247	6.89689	0.0304324	0.651813
chr6_132714058_132714278	-5.97136	3.34247	6.89689	0.0304324	0.651813
chr2_167983766_167983966	-5.98401	3.34738	6.89645	0.0304363	0.651813
chr6_9463427_9463861	-5.9821	3.35198	6.89601	0.0304402	0.651813
chr11_76802284_76802484	-6.07045	3.40685	6.8955	0.0304448	0.651813
chr14_83108842_83109164	-6.03239	3.3852	6.89506	0.0304488	0.651813
chr1_97880593_97881166	-5.93258	3.31519	6.89498	0.0304495	0.651813
chr8_62248581_62248942	-5.96115	3.33487	6.89481	0.0304511	0.651813
chr1_190422587_190423122	-5.97232	3.34013	6.89471	0.0304519	0.651813
chr4_147016355_147016725	-6.02297	3.37375	6.89387	0.0304595	0.651813
chr5_7816302_7816873	-0.447438	6.04256	6.16464	0.0304596	0.651813
chr5_167264979_167265338	-5.93195	3.31313	6.89338	0.0304639	0.651813
chr14_96150126_96150426	-6.03866	3.3856	6.89332	0.0304645	0.651813
chr4_25793927_25794197	-5.78275	3.21964	6.893	0.0304673	0.651813
chr5_114404987_114405318	-5.99561	3.35459	6.89288	0.0304684	0.651813
chr2_17021684_17022174	-5.89206	3.28518	6.89257	0.0304712	0.651813
chr4_35409396_35409637	-5.96482	3.34217	6.89166	0.0304793	0.651813
chr16_87312153_87312674	-5.75449	3.19329	6.89159	0.03048	0.651813
chr12_129098484_129098761	-5.80406	3.2297	6.89153	0.0304806	0.651813
chr9_82493050_82493391	-5.96771	3.33515	6.89139	0.0304818	0.651813
chr17_13505192_13505843	-5.85489	3.25719	6.89138	0.0304819	0.651813
chr5_88716907_88717102	-5.85489	3.25719	6.89138	0.0304819	0.651813
chr6_167913998_167914469	-5.85489	3.25719	6.89138	0.0304819	0.651813
chrUn_gl000225_116499_117204	0.519254	7.72258	6.16134	0.0304956	0.651813
chrX_106137521_106138114	-0.52712	5.16175	6.16103	0.0304989	0.651813
chr9_10479253_10479464	-6.01759	3.37115	6.88915	0.030502	0.651813
chr7_134758953_134759207	-5.93926	3.31542	6.88903	0.030503	0.651813
chr2_190406892_190407423	-0.637988	5.06336	6.16035	0.0305064	0.651813
chr10_25515910_25516359	-5.87253	3.27021	6.88862	0.0305067	0.651813
chrX_129527520_129527724	-6.03427	3.38084	6.88816	0.0305109	0.651813
chr20_13878608_13878910	-5.80532	3.22105	6.88792	0.0305131	0.651813
chr14_51623882_51624218	-5.95299	3.33494	6.88785	0.0305137	0.651813
chr8_131840567_131841287	-5.80633	3.22554	6.88783	0.0305139	0.651813
chr1_198223777_198224151	-5.98822	3.35654	6.88755	0.0305164	0.651813
chr18_39878832_39879127	-5.96054	3.33286	6.88713	0.0305202	0.651813
chr4_81973584_81973890	-5.96054	3.33286	6.88713	0.0305202	0.651813
chr1_50814302_50814822	-5.79208	3.21314	6.88688	0.0305224	0.651813
chr16_23652421_23653069	0.480374	5.46458	6.22386	0.0305257	0.651813
chr14_34407608_34408122	-5.84036	3.25607	6.88652	0.0305257	0.651813
chr13_109380804_109380992	-5.88505	3.27781	6.88628	0.0305278	0.651813
chr11_49304888_49305197	-5.92999	3.31799	6.88621	0.0305285	0.651813
chr9_74012787_74013044	-5.90629	3.30533	6.88608	0.0305297	0.651813
chr1_242310571_242310912	-5.70027	3.14485	6.886	0.0305304	0.651813
chr4_142623751_142624201	-6.00712	3.36177	6.88432	0.0305455	0.651813
chr10_110729873_110730059	-5.874	3.27015	6.88412	0.0305473	0.651813
chr2_75601544_75601818	-5.99276	3.36139	6.88401	0.0305483	0.651813
chr5_34234557_34234869	-5.78793	3.23168	6.8839	0.0305493	0.651813
chr3_189771942_189772361	-6.05417	3.39733	6.88387	0.0305496	0.651813
chr1_171183310_171183795	-5.85315	3.2637	6.88387	0.0305496	0.651813
chr2_200269957_200270297	-6.07284	3.40449	6.88232	0.0305636	0.651813
chr7_154624374_154624711	-5.81255	3.22831	6.88229	0.0305639	0.651813
chr2_192496408_192496902	-5.96212	3.33251	6.88227	0.030564	0.651813
chr15_92850037_92850187	-5.97329	3.33779	6.88139	0.030572	0.651813
chr4_171671724_171671923	-5.97329	3.33779	6.88139	0.030572	0.651813
chr1_218126491_218127693	-0.476419	5.38698	6.19487	0.0305731	0.651813
chr2_120961607_120962106	-5.91459	3.29811	6.88067	0.0305785	0.651813
chr8_82563556_82563867	-5.78682	3.20745	6.88037	0.0305813	0.651813
chr3_174839039_174839492	-6.07137	3.40475	6.88035	0.0305814	0.651813
chr5_142488235_142488624	-5.76931	3.2118	6.88034	0.0305815	0.651813
chr1_95320041_95320583	-5.99977	3.36368	6.88016	0.0305831	0.651813
chr1_116711115_116711452	-6.15007	3.44604	6.87972	0.0305871	0.651813
chr12_101271517_101272048	-5.84939	3.25003	6.87889	0.0305946	0.651813
chr16_4233181_4234116	0.904963	4.82117	6.15207	0.0305968	0.651813
chr4_185747009_185747469	-5.74834	3.18508	6.87837	0.0305993	0.651813
chr4_57666063_57666579	-5.98761	3.35458	6.87804	0.0306023	0.651813
chr14_34950258_34950511	-5.77871	3.2052	6.8765	0.0306162	0.651813
chr14_78996489_78996847	-6.02892	3.37825	6.8764	0.0306171	0.651813
chr20_24493159_24493385	-6.02892	3.37825	6.8764	0.0306171	0.651813
chr4_150629792_150630311	-5.81442	3.24071	6.87629	0.0306181	0.651813
chr6_62519033_62519363	-5.87967	3.27081	6.87579	0.0306227	0.651813
chr8_93848130_93848509	-5.94354	3.3181	6.87485	0.0306312	0.651813
chr3_189010554_189011261	-5.8708	3.27659	6.87409	0.0306381	0.651813
chr8_95579903_95580084	-6.06485	3.40213	6.87255	0.0306521	0.651813
chr9_15142898_15143479	-5.95546	3.32546	6.87232	0.0306541	0.651813
chr8_101225031_101226073	0.549852	5.1491	6.14653	0.0306575	0.651813
chr3_173353726_173354004	-5.92818	3.30554	6.87115	0.0306647	0.651813
chr5_161675189_161675537	-5.92818	3.30554	6.87115	0.0306647	0.651813
chr6_122901986_122902307	-5.92329	3.31776	6.87087	0.0306672	0.651813
chr5_144228024_144228328	-5.84813	3.25833	6.86997	0.0306754	0.651813
chr3_14864525_14864926	-5.93669	3.3174	6.86986	0.0306764	0.651813
chr6_24720985_24721960	-0.511785	5.21677	7.83705	0.0306793	0.651813
chr2_178677400_178677908	-0.513803	5.19179	8.87492	0.0306793	0.651813
chr9_27535878_27536077	-6.01124	3.37079	6.86942	0.0306804	0.651813
chr5_148414998_148415302	-5.89701	3.28372	6.86937	0.0306808	0.651813
chr10_81931082_81931408	-5.97191	3.33778	6.86907	0.0306836	0.651813
chr8_122681847_122682250	-5.93838	3.31139	6.86732	0.0306995	0.651813
chr5_9156460_9156768	-5.95554	3.33224	6.86714	0.0307011	0.651813
chr9_130179536_130179846	-5.83145	3.23675	6.86557	0.0307154	0.651813
chr3_163340243_163340482	-5.98666	3.35685	6.86532	0.0307177	0.651813
chr11_17994632_17994878	-5.9673	3.33278	6.86509	0.0307198	0.651813
chr1_208218947_208219248	-5.96012	3.33049	6.86441	0.0307259	0.651813
chr3_144081019_144081261	-5.99521	3.35228	6.86421	0.0307278	0.651813
chr8_109977934_109978442	-6.02928	3.37412	6.863	0.0307388	0.651813
chr19_52692844_52693720	0.478442	5.24471	7.09289	0.030739	0.651813
chr4_112258144_112258828	-0.652862	5.14281	6.13901	0.0307401	0.651813
chr16_85780061_85780243	-5.99108	3.34967	6.86259	0.0307425	0.651813
chr5_149127099_149127378	-5.90062	3.2968	6.86209	0.0307471	0.651813
chr5_28345050_28345358	-6.04945	3.39042	6.86207	0.0307472	0.651813
chr7_92464812_92465120	-6.0063	3.35797	6.86177	0.03075	0.651813
chr8_124732090_124732614	-5.97788	3.34276	6.86134	0.0307539	0.651813
chr5_54522347_54522705	-5.99025	3.34581	6.86029	0.0307634	0.651813
chr3_193136465_193136847	-6.00203	3.35492	6.85978	0.0307681	0.651813
chr6_72564884_72565490	-5.81944	3.23337	6.8592	0.0307734	0.651813
chr14_46279547_46279974	-6.01795	3.36699	6.85803	0.030784	0.651813
chr3_5562032_5562200	-5.96248	3.3281	6.85672	0.030796	0.651813
chr6_10134251_10134850	-6.00807	3.3595	6.85641	0.0307988	0.651813
chr9_82186184_82186897	-0.381091	6.19586	6.13368	0.0307989	0.651813
chr12_101127706_101127865	-5.95503	3.32388	6.85538	0.0308082	0.651813
chr17_52831963_52832182	-6.02907	3.3723	6.8546	0.0308153	0.651813
chr5_23526858_23527682	-0.645337	5.64791	6.13212	0.0308161	0.651813
chr11_128754545_128754862	-5.63442	3.09692	6.85441	0.0308171	0.651813
chr8_119320177_119320370	-5.89241	3.28046	6.852	0.0308391	0.651813
chr7_105305395_105305778	-6.14236	3.44905	6.85185	0.0308405	0.651813
chr1_215256937_215257209	-6.0018	3.35305	6.85155	0.0308432	0.651813
chr8_49166553_49166828	-5.9218	3.30076	6.85147	0.0308439	0.651813
chr10_91035107_91035591	-5.90404	3.28434	6.85131	0.0308454	0.651813
chr1_198041357_198041760	-6.07895	3.40494	6.85098	0.0308484	0.651813
chr9_123817979_123818185	-6.03991	3.37794	6.8493	0.0308637	0.651813
chr2_65144794_65145211	-5.94523	3.31208	6.84929	0.0308638	0.651813
chr7_25878343_25879112	-5.96562	3.33859	6.84879	0.0308684	0.651813
chr2_113961607_113961799	-5.93321	3.30463	6.84847	0.0308713	0.651813
chr8_94995353_94995705	-6.01161	3.36585	6.84826	0.0308733	0.651813
chr12_83526786_83527314	-6.05893	3.40269	6.84712	0.0308837	0.651813
chr5_145806586_145807178	-5.89168	3.27675	6.84596	0.0308943	0.651813
chr2_173863263_173863660	-6.02053	3.37548	6.84591	0.0308948	0.651813
chr3_38780043_38780548	-5.9804	3.34009	6.84539	0.0308995	0.651813
chr16_26963389_26963953	-5.9618	3.3246	6.84515	0.0309017	0.651813
chr2_192183340_192183889	-5.86535	3.27049	6.84319	0.0309197	0.651813
chr14_57097553_57097818	-5.94567	3.31369	6.84247	0.0309263	0.651813
chr11_88831193_88831544	-5.89794	3.28702	6.84206	0.03093	0.651813
chr2_157842931_157843278	-5.89794	3.28702	6.84206	0.03093	0.651813
chr3_97732619_97733012	-6.05696	3.39089	6.84142	0.030936	0.651813
chr5_36265561_36265837	-5.86488	3.26794	6.84084	0.0309413	0.651813
chr14_72870843_72871224	-5.8926	3.28009	6.84037	0.0309456	0.651813
chr1_181373904_181374489	-6.06446	3.4007	6.83965	0.0309522	0.651813
chr1_206718238_206718536	-6.06217	3.39212	6.83941	0.0309544	0.651813
chr3_36910312_36910639	-6.04742	3.39429	6.83933	0.0309551	0.651813
chr16_23286357_23286577	-6.01732	3.36365	6.83818	0.0309656	0.651813
chr5_180633779_180634202	-6.01327	3.36027	6.83802	0.0309672	0.651813
chr1_71361718_71362281	-5.93624	3.31581	6.83791	0.0309681	0.651813
chr4_17348996_17349338	-5.73388	3.16744	6.83765	0.0309705	0.651813
chr6_140074635_140074997	-5.73388	3.16744	6.83765	0.0309705	0.651813
chr2_92281263_92281679	1.04913	8.28733	6.11803	0.0309721	0.651813
chr15_52642700_52642960	-5.99067	3.34734	6.8372	0.0309747	0.651813
chr20_18038207_18038698	-5.94992	3.31721	6.83452	0.0309993	0.651813
chr4_182480872_182481326	-5.94992	3.31721	6.83452	0.0309993	0.651813
chr1_198181315_198181998	-5.8992	3.27904	6.83369	0.0310069	0.651813
chr12_116844419_116844760	-5.97147	3.33623	6.83295	0.0310138	0.651813
chr1_172697031_172697446	-1.09873	5.24408	6.11413	0.0310155	0.651813
chr11_20048775_20049056	-6.03553	3.37312	6.83211	0.0310215	0.651813
chrX_30636487_30636783	-6.13535	3.43363	6.83206	0.031022	0.651813
chr11_6440374_6440812	-5.73282	3.17053	6.83105	0.0310313	0.651813
chr11_85652393_85652796	-5.9698	3.342	6.83048	0.0310365	0.651813
chr10_5024178_5024703	-6.03624	3.38729	6.82746	0.0310643	0.651813
chr5_18984469_18985409	-0.761435	4.88427	6.10845	0.0310787	0.651813
chr11_102323249_102323877	-5.96855	3.32532	6.82304	0.0311051	0.651813
chr9_127082523_127082963	-6.05745	3.38589	6.82021	0.0311313	0.651813
chr1_75889365_75889683	-6.14675	3.43908	6.81977	0.0311354	0.651813
chr12_19426805_19427195	-0.774704	4.79008	6.10089	0.0311633	0.651813
chr14_26632863_26633460	-0.399327	5.99628	6.10007	0.0311724	0.651813
chr3_66458166_66458443	-5.99193	3.34003	6.81391	0.0311896	0.651813
chr6_114901819_114902398	-6.01408	3.36407	6.81207	0.0312067	0.651813
chr14_104159785_104160193	-6.03072	3.36676	6.81058	0.0312205	0.651813
chr2_183580236_183581631	-0.412719	6.25834	6.09511	0.031228	0.651813
chr17_59853752_59854446	0.408662	5.87932	6.09199	0.0312631	0.651813
chr17_54016260_54016777	-5.74278	3.16464	6.80489	0.0312733	0.651813
chr20_52867290_52868259	-0.357331	6.42094	6.08951	0.031291	0.651813
chr3_39333329_39333597	-6.05706	3.38442	6.80261	0.0312945	0.651813
chr17_21226287_21226693	2.5563	4.65948	6.0858	0.0313327	0.651942
chr1_206785526_206786185	0.464272	5.45548	6.08413	0.0313515	0.651942
chr6_121363342_121364046	-0.47333	5.28599	6.08297	0.0313645	0.651942
chr7_92392950_92393308	-0.436437	5.50298	6.0817	0.0313789	0.651942
chr20_60876993_60878108	0.514402	5.49078	6.07676	0.0314347	0.6523
chr8_144489993_144490478	-5.97528	3.32604	6.78754	0.0314352	0.6523
chr1_234201695_234202019	-5.66278	3.1175	6.77915	0.0315139	0.652886
chr16_58718595_58718947	-5.66278	3.1175	6.77915	0.0315139	0.652886
chr7_61970120_61970590	1.07297	9.46451	6.0657	0.0315601	0.652886
chr7_16707653_16708155	-0.376058	5.88525	6.21957	0.0316053	0.652886
chr6_131254850_131255369	-0.396806	5.90494	7.29494	0.0316053	0.652886
chrX_134730466_134730713	-6.17621	3.45379	6.76905	0.031609	0.652886
chr18_71442116_71442361	-5.81379	3.21235	6.76338	0.0316624	0.652886
chr7_144622755_144623014	-5.81379	3.21235	6.76338	0.0316624	0.652886
chr3_103711347_103711636	-5.80736	3.20898	6.76313	0.0316648	0.652886
chr2_20050882_20051272	-5.86808	3.25456	6.76186	0.0316768	0.652886
chr7_27463941_27464457	-5.95803	3.32268	6.75689	0.0317238	0.652886
chr2_49998095_49998563	-5.8691	3.25184	6.75563	0.0317357	0.652886
chr6_16711863_16712062	-5.89799	3.27537	6.75286	0.031762	0.652886
chr5_91144224_91144580	-5.82913	3.23569	6.75212	0.0317691	0.652886
chrX_122703715_122704517	-0.488366	5.2213	7.08192	0.031776	0.652886
chr10_89453714_89454196	-5.90504	3.27599	6.75133	0.0317765	0.652886
chr3_152878375_152880469	-0.637905	6.58168	6.04416	0.0318059	0.653088
chr5_103748656_103748895	-5.87629	3.2524	6.7401	0.0318834	0.653481
chr5_131849992_131850264	-5.87629	3.2524	6.7401	0.0318834	0.653481
chr4_49120839_49121657	0.771032	7.18791	6.03169	0.0319493	0.653481
chr12_81471172_81472207	-0.50393	5.51385	6.02945	0.0319752	0.653481
chr12_60660152_60660600	0.649668	4.91549	6.0288	0.0319827	0.653481
chr7_134434682_134435246	-6.01272	3.35313	6.72752	0.0320035	0.653481
chr1_17231215_17231682	0.526897	5.93749	6.02555	0.0320203	0.653481
chr4_168186457_168186741	-6.04527	3.37552	6.72456	0.0320319	0.653481
chr3_96213867_96214339	-5.95117	3.31039	6.72386	0.0320386	0.653481
chr6_79385788_79386643	-0.518513	5.63137	6.0229	0.0320509	0.653481
chr1_168408931_168409411	-0.570704	5.03664	6.02161	0.0320659	0.653481
chr7_32504190_32504893	-5.88483	3.27154	6.71813	0.0320937	0.653481
chr6_120468536_120468889	-5.91805	3.27985	6.71752	0.0320995	0.653481
chr21_44753164_44753691	-6.07991	3.39106	6.71742	0.0321004	0.653481
chr11_110044916_110045183	-5.89396	3.26684	6.71551	0.0321188	0.653481
chr17_67772842_67773362	-6.05901	3.37494	6.70858	0.0321856	0.65444
chr9_100967962_100968254	-5.88345	3.25296	6.70427	0.0322272	0.654616
chr3_168388802_168389346	-0.558883	5.54542	6.00437	0.0322663	0.654616
chr3_115044438_115044715	-6.06917	3.38496	6.69763	0.0322915	0.654616
chr1_198740839_198741047	-5.99373	3.32943	6.69666	0.0323008	0.654616
chr3_19526753_19527119	-6.04264	3.36569	6.69353	0.0323312	0.654616
chr3_166926746_166927108	-0.649999	4.95603	5.99878	0.0323316	0.654616
chrY_13460958_13461317	0.546197	7.51008	5.99878	0.0323316	0.654616
chr7_25901788_25902483	-0.385006	7.00854	5.99535	0.0323717	0.654775
chr8_127009524_127010211	-5.96575	3.30929	6.68864	0.0323786	0.654775
chr2_133246821_133247112	-5.98805	3.32627	6.68261	0.0324373	0.655262
chr3_168229121_168229588	-5.75906	3.17475	6.68213	0.032442	0.655262
chrX_29496665_29497049	-3.08434	4.39591	5.98316	0.032515	0.656042
chr3_64097497_64097849	-2.00603	5.8021	5.98119	0.0325382	0.656042
chrX_129587070_129587544	-5.89564	3.25955	6.67213	0.0325396	0.656042
chr2_190525818_190526425	-0.366116	6.29997	5.97789	0.032577	0.656389
chrUn_gl000225_92098_93154	0.634922	6.45525	5.97496	0.0326116	0.656389
chr10_2434439_2434855	0.86534	4.75568	5.97461	0.0326158	0.656389
chrX_106045458_106046368	-0.383983	5.88552	5.97174	0.0326497	0.656675
chr2_182942317_182942849	-0.794175	4.79214	5.96648	0.0327121	0.657494
chr16_8715329_8716299	0.697404	5.18811	5.96395	0.0327421	0.657494
chr4_155664788_155665503	-0.417741	6.21547	5.96332	0.0327496	0.657494
chr7_2900358_2900669	-5.98675	3.32692	6.64371	0.0328191	0.658106
chrY_13861442_13861631	2.74839	6.05193	5.95745	0.0328195	0.658106
chr7_131543966_131544569	-0.523656	5.22983	6.76555	0.0328438	0.658198
chr12_91347489_91348035	-1.20535	4.86186	5.95086	0.0328981	0.65889
chr4_49128923_49129092	2.42384	6.1645	5.9455	0.0329622	0.659293
chr3_20381861_20382425	-0.581855	4.98891	5.9445	0.0329742	0.659293
chr4_18604128_18604849	-0.720761	4.79461	5.94178	0.0330067	0.659293
chr7_37873102_37873387	-5.81117	3.20918	6.62313	0.0330234	0.659293
chr5_18506886_18507677	0.602845	5.37377	5.93931	0.0330364	0.659293
chr19_44961314_44961499	2.48143	5.23442	5.93928	0.0330368	0.659293
chr9_109655000_109655633	-0.52449	5.52386	5.93175	0.0331273	0.66067
chr17_7387928_7388269	-5.92185	3.28136	6.60931	0.0331615	0.66067
chr19_27733016_27733427	1.03925	9.70862	5.92861	0.0331652	0.66067
chr21_46920474_46920888	1.42478	4.76243	5.92631	0.0331929	0.660827
chr3_161355424_161356092	-6.10015	3.39954	6.60133	0.0332416	0.661402
chr12_44394101_44394572	-0.481101	5.46017	6.75907	0.0332762	0.661544
chr10_25351356_25351627	-6.06802	3.37998	6.595	0.0333052	0.661544
chr18_21096020_21096356	-5.93962	3.29107	6.59386	0.0333167	0.661544
chr3_61235708_61235978	-0.541001	5.28047	5.91515	0.033328	0.661544
chr9_81319172_81319440	-6.09487	3.39649	6.58637	0.0333923	0.662082
chr11_30149816_30150292	-5.9567	3.30558	6.58612	0.0333948	0.662082
chr1_156186365_156186520	2.46799	5.26054	5.89599	0.0335615	0.664645
chrX_137187364_137188148	-1.29255	5.03679	5.89579	0.0335639	0.664645
chr11_51586704_51587089	0.957476	8.75309	5.89384	0.0335878	0.664724
chr5_118755955_118756531	-0.544849	5.10397	6.17012	0.0336558	0.665675
chr1_181393963_181394542	-0.40924	5.7705	7.07709	0.0336954	0.665972
chr20_40182699_40183313	1.39623	4.73899	5.88382	0.0337108	0.665972
chr4_170580966_170581786	-0.414695	5.69102	5.87828	0.0337789	0.666924
chr1_247526444_247526628	1.69249	4.84789	5.86694	0.0339192	0.669118
chr3_8281242_8282004	-1.56537	4.99974	5.8654	0.0339382	0.669118
chr3_186882929_186883191	-5.99199	3.32261	6.53175	0.0339502	0.669118
chr7_51383973_51385162	-0.684848	4.89573	5.85143	0.0341121	0.671912
chr7_140396255_140397316	-0.442396	5.47233	5.84859	0.0341476	0.672192
chr14_102770989_102771820	0.594645	5.26236	5.84706	0.0341666	0.672192
chr10_109370507_109371287	-0.542939	5.18742	5.84241	0.0342249	0.672942
chr3_174158587_174159474	-0.405759	5.93595	5.83754	0.0342859	0.673509
chr2_163200167_163201135	-0.372272	7.22402	5.83689	0.0342941	0.673509
chr9_67320452_67320926	0.855145	8.64083	5.83165	0.03436	0.673902
chr7_12558727_12559454	-0.504492	5.50984	5.83082	0.0343704	0.673902
chr8_127522415_127523066	-0.419525	6.99226	5.83041	0.0343756	0.673902
chr2_213770217_213771117	-0.425571	5.99942	5.82737	0.034414	0.673902
chr16_33866104_33867329	0.957264	6.42447	5.82728	0.0344151	0.673902
chr12_122124772_122125333	0.59913	5.14095	5.82391	0.0344576	0.674339
chrY_13141742_13142053	2.50699	5.0523	5.82123	0.0344915	0.674553
chr6_1641587_1641920	-0.417166	5.90055	5.81846	0.0345266	0.674553
chr4_13264156_13264767	-0.594574	5.08375	5.8169	0.0345463	0.674553
chr7_120590515_120591506	-0.35741	6.93955	5.81665	0.0345495	0.674553
chrX_61682234_61682470	2.76684	4.99684	5.80548	0.0346914	0.676625
chr2_16816850_16817528	-1.94064	4.71548	5.80511	0.0346961	0.676625
chr20_48531847_48532569	0.452526	5.54868	5.80207	0.0347348	0.676983
chr19_42579945_42580630	0.682341	4.95229	5.79638	0.0348074	0.678003
chr2_20850287_20851455	-0.37228	5.98667	6.53946	0.0348709	0.678844
chr10_38804297_38804488	3.42381	5.3001	5.77998	0.035018	0.681309
chr8_107775204_107775707	-0.462209	5.63824	5.77761	0.0350484	0.681504
chr17_55927043_55927978	0.380613	5.87411	5.77388	0.0350966	0.682043
chr12_93835457_93836370	-0.433294	5.58204	7.22891	0.0351541	0.682764
chr5_56469084_56470150	-0.563364	5.6798	5.75708	0.0353143	0.685476
chr2_89869764_89869948	2.20799	7.22438	5.75366	0.0353589	0.685736
chr3_168890961_168891669	-0.370256	5.76829	6.64392	0.0353688	0.685736
chrUn_gl000228_117966_118839	0.531057	9.07307	5.74833	0.0354284	0.686493
chr12_100967038_100968046	-0.342772	6.25452	5.73918	0.0355483	0.688327
chr8_91410991_91411842	-0.530909	7.12309	5.7377	0.0355677	0.688327
chr10_91011205_91011940	-0.362811	6.29795	5.73507	0.0356022	0.688327
chr2_739979_740917	-0.399097	8.62412	5.7342	0.0356136	0.688327
chrUn_gl000220_160622_161633	0.525239	8.47156	5.73324	0.0356262	0.688327
chr7_11301107_11301714	-0.372015	6.20553	5.72635	0.035717	0.689632
chr14_60155081_60155417	-1.20203	5.04936	5.72497	0.0357351	0.689632
chr12_90345032_90345624	-0.524685	5.22385	5.7195	0.0358075	0.690347
chr7_111085537_111086379	-0.520724	5.86094	5.71857	0.0358197	0.690347
chr14_81630503_81630936	-0.484396	5.65692	5.71748	0.0358342	0.690347
chr5_114879994_114880928	-0.434542	6.58382	5.70121	0.0360504	0.694111
chr15_21312877_21313750	0.571598	5.47971	5.69709	0.0361055	0.69477
chr4_159592759_159593725	-0.377945	6.80593	5.69065	0.0361916	0.696026
chr12_87514171_87514570	-0.454924	5.47045	5.68524	0.0362643	0.697022
chr6_2634441_2635032	-0.61749	5.0303	5.68137	0.0363163	0.69762
chr8_93977118_93978535	-0.314784	6.62439	5.67733	0.0363707	0.698263
chr7_75795763_75796376	0.521209	5.28032	5.67492	0.0364033	0.698487
chrX_94117254_94117981	-0.515644	5.30638	5.67196	0.0364432	0.698642
chr6_125566541_125567248	-0.577824	4.9385	5.67122	0.0364532	0.698642
chr8_46868429_46868843	1.10501	5.26637	5.66748	0.0365038	0.699209
chr19_55973023_55973446	0.695643	4.84613	5.66549	0.0365308	0.699325
chr5_111327076_111327832	-0.400113	5.97011	5.66129	0.0365877	0.69967
chr4_160023766_160024700	-0.439312	5.82103	5.66107	0.0365908	0.69967
chr20_62288759_62289391	0.429761	5.47039	7.57591	0.0366121	0.699677
chr5_168374266_168374711	-2.56677	4.68608	5.65052	0.0367344	0.701612
chr4_71767621_71768848	-0.50907	5.2084	5.64869	0.0367593	0.701686
chr7_56441130_56441377	1.52901	5.7066	5.64453	0.0368162	0.702371
chr1_114734757_114735378	-2.02951	4.91863	5.64096	0.0368651	0.702902
chr11_51582644_51583019	0.903682	8.05499	5.63442	0.0369549	0.704211
chr1_240348236_240348416	1.15845	5.15266	5.6305	0.0370088	0.704553
chr1_170105038_170105674	-0.630057	5.14126	5.62969	0.03702	0.704553
chr3_33481608_33482668	-0.434384	6.28756	5.62748	0.0370504	0.704553
chr18_18517118_18517716	0.917447	7.88842	5.62494	0.0370855	0.704553
chrX_84634335_84634861	-0.699206	4.81648	5.62328	0.0371084	0.704553
chr16_29827223_29828163	0.505784	5.08577	5.67457	0.0371206	0.704553
chr9_126692028_126692585	0.523093	5.05585	7.4838	0.0371206	0.704553
chr21_14352975_14353356	1.43604	6.24307	5.61763	0.0371865	0.705401
chr7_86475897_86476582	-0.388805	6.22795	5.6144	0.0372313	0.705505
chr7_18705741_18706171	-1.31401	4.75778	5.61419	0.0372342	0.705505
chr13_19449026_19449666	0.58976	5.07609	5.60947	0.0372998	0.706346
chr7_100887620_100888519	0.437721	5.29867	5.91838	0.0373552	0.706556
chr14_20800777_20801788	0.468038	5.31575	6.55513	0.0373552	0.706556
chr8_86089165_86090281	0.50736	5.14083	5.8719	0.0373984	0.706556
chrUn_gl000226_13683_14969	1.10094	8.39062	5.60194	0.0374045	0.706556
chr4_49107431_49107663	2.11502	7.29189	5.60017	0.0374292	0.706556
chr14_50583016_50583648	0.500773	5.23994	6.73662	0.0374558	0.706556
chr3_187467885_187468474	-0.648949	5.14979	5.59804	0.0374591	0.706556
chr10_42399229_42399511	0.988566	8.81477	5.59624	0.0374842	0.70663
chr1_63988570_63989563	-0.394111	5.64204	5.92723	0.0375388	0.706777
chrX_61719362_61719876	2.57673	6.66969	5.59111	0.037556	0.706777
chrUn_gl000226_752_1962	1.03837	8.16236	5.59035	0.0375666	0.706777
chr1_65933109_65933735	-0.350621	6.05261	5.58897	0.037586	0.706777
chr21_10836230_10836426	1.64885	5.25876	5.58812	0.0375979	0.706777
chr14_24740280_24741066	0.485889	5.24318	5.58547	0.0376351	0.707078
chr5_111725915_111726616	-0.473481	5.4928	5.58052	0.0377048	0.707989
chr20_52327867_52328429	-1.96582	5.79104	5.57549	0.0377757	0.708639
chr8_140688058_140688376	-0.574094	5.27145	5.57505	0.0377819	0.708639
chr1_117602066_117603233	-0.360702	5.93775	6.93504	0.0378198	0.708952
chr6_10694548_10695400	-0.402325	5.52539	5.67914	0.0379681	0.711266
chr4_139818932_139819725	-0.440228	5.37895	5.97089	0.0379859	0.711266
chr6_126660925_126661719	-0.37307	6.08735	5.55396	0.038081	0.712647
chr1_197115238_197116249	-0.349274	6.72785	5.55167	0.0381138	0.712719
chr2_198569525_198570696	-0.38633	6.11168	5.5507	0.0381276	0.712719
chr4_49136750_49136914	2.62539	6.0409	5.54002	0.0382804	0.714143
chr14_58637703_58638286	-0.370488	5.89479	5.538	0.0383094	0.714143
chr1_98386176_98387129	-0.417255	6.15236	5.53756	0.0383156	0.714143
chr1_107422033_107422614	-2.48003	4.72037	5.53686	0.0383258	0.714143
chr14_55031907_55032826	0.502492	5.12185	5.53684	0.038326	0.714143
chr7_105649803_105650406	-0.378398	6.19506	5.5348	0.0383554	0.714143
chr10_130262633_130262876	2.65051	4.465	5.53415	0.0383647	0.714143
chr4_164172385_164172761	-1.15823	4.92706	5.53234	0.0383907	0.714143
chr9_gl000199_random_137930_138150	0.94222	7.47764	5.53043	0.0384182	0.714143
chr9_117160219_117161019	-0.361811	5.83435	5.53003	0.038424	0.714143
chr11_65686384_65687241	0.531727	4.96515	5.52897	0.0384392	0.714143
chr4_140003993_140004461	-0.45301	5.28653	7.08878	0.0384836	0.71457
chr17_53603639_53604162	-0.516311	5.4552	5.52033	0.0385641	0.715666
chr8_131814694_131815236	-0.519113	5.39482	5.51508	0.0386401	0.716679
chr14_57856534_57858483	-0.530618	5.4985	5.51191	0.0386861	0.716772
chr4_23616088_23616608	-0.543175	5.20927	5.51137	0.038694	0.716772
chr1_200059559_200060371	-1.4602	5.17889	5.51011	0.0387123	0.716772
chr1_177841456_177842683	-0.70362	4.89711	5.50882	0.0387311	0.716772
chr9_706753_707950	-0.549994	5.05499	5.49352	0.0389545	0.720479
chr13_108655914_108656650	-0.472676	5.17098	5.49214	0.0389746	0.720479
chr5_95194413_95194896	-0.496151	5.27661	5.48343	0.0391025	0.722443
chr12_34846307_34846482	1.76948	6.29505	5.47827	0.0391786	0.722803
chr8_43092764_43093542	0.763411	11.0624	5.47805	0.0391818	0.722803
chrUn_gl000225_21_242	2.69463	4.69818	5.4777	0.0391869	0.722803
chr9_33264301_33265357	0.53908	5.10541	5.46956	0.0393073	0.724623
chr6_19269631_19270189	-0.624366	4.943	5.46712	0.0393435	0.724889
chr17_31149601_31149887	1.73865	4.79634	5.46384	0.0393921	0.725384
chr11_102979811_102980630	-0.428297	5.5142	6.223	0.0394558	0.726157
chr8_123745793_123746241	-0.491176	5.29427	5.45505	0.0395229	0.7266
chr10_131908546_131910088	-0.349604	6.33599	5.45501	0.0395235	0.7266
chr4_123073163_123074103	-0.349823	6.00361	5.68755	0.0395499	0.726686
chr1_31904595_31905019	0.879484	5.60967	5.44936	0.0396079	0.727351
chr14_55878218_55878901	0.580829	5.04213	5.44707	0.039642	0.727577
chr7_110082349_110082820	-1.01734	5.20038	5.44103	0.0397326	0.728839
chr1_226111609_226112352	0.462718	5.1504	5.43449	0.0398309	0.73024
chr5_177631119_177632158	-0.616212	5.08587	5.43201	0.0398682	0.730523
chr6_152084543_152085655	-0.470332	5.32417	5.42823	0.0399252	0.731165
chr1_84326151_84326978	-0.514146	5.39055	5.42102	0.0400342	0.732063
chr15_49462138_49462648	0.708026	4.81721	5.41911	0.0400631	0.732063
chr3_142719845_142720866	-0.420884	5.5167	7.59861	0.0400711	0.732063
chr13_20207345_20208142	0.388982	5.80049	5.41773	0.0400839	0.732063
chrX_106567828_106568496	-0.466153	5.71404	5.41772	0.0400842	0.732063
chr4_7044232_7045141	0.547811	4.9661	5.41629	0.0401058	0.732063
chr3_8810827_8811321	-0.423763	5.75039	5.82956	0.0401988	0.733265
chr21_40817319_40818009	0.437022	5.31859	5.40907	0.0402156	0.733265
chr20_29817772_29818043	2.95564	5.44407	5.39901	0.0403691	0.735661
chr17_59843812_59844466	0.51672	6.31109	5.39583	0.0404177	0.736145
chr14_33214682_33215160	-0.427066	5.44545	5.3921	0.040475	0.736786
chrX_100662599_100663643	-0.352895	5.90238	5.38765	0.0405433	0.737302
chr7_33847494_33847978	-1.5497	4.99604	5.38737	0.0405475	0.737302
chr7_12879144_12879890	-0.391547	5.81397	7.19667	0.040704	0.739744
chr1_201123149_201123946	0.458769	5.40228	5.37384	0.0407563	0.740291
chr12_54219082_54219602	0.491142	5.34686	5.37	0.0408158	0.740923
chr2_187636202_187637347	-0.467977	6.43347	5.36873	0.0408355	0.740923
chr2_92295935_92297582	0.903387	7.7575	5.35563	0.0410392	0.744215
chr3_27700763_27701342	-1.43494	4.69324	5.34745	0.041167	0.745591
chr6_134158830_134159468	-0.358216	5.94904	5.34653	0.0411815	0.745591
chr16_70099630_70100413	0.535823	5.26773	5.34649	0.0411822	0.745591
chr17_22258077_22258700	1.07126	7.6525	5.34215	0.0412502	0.74572
chr19_27738384_27738920	0.925051	9.78673	5.34189	0.0412542	0.74572
chr5_154429264_154429838	-1.09297	4.95299	5.34176	0.0412563	0.74572
chr8_10405260_10405912	-0.669518	4.90607	5.33984	0.0412865	0.745861
chr16_28223064_28223691	1.41892	4.70435	5.33146	0.0414183	0.747838
chr3_138312635_138313824	-0.657468	5.78438	5.32775	0.041477	0.748492
chr7_24329807_24330323	-0.502059	5.1157	5.58513	0.0415071	0.74863
chr1_30911225_30911697	0.495116	6.0593	5.31191	0.0417282	0.752212
chr5_72111969_72113011	0.68957	4.84993	5.30385	0.0418568	0.753822
chr3_64449056_64449622	-0.352405	6.31355	5.30348	0.0418627	0.753822
chr10_135333596_135334144	-0.598872	4.97202	5.29924	0.0419305	0.754637
chr4_142774382_142775012	-0.555776	5.2445	5.29692	0.0419677	0.754899
chr20_52468434_52469060	0.395004	6.5069	5.29312	0.0420286	0.755587
chr15_62042557_62043167	-0.563932	5.1148	5.28566	0.0421486	0.757335
chr9_66971006_66971530	0.947703	8.54707	5.27966	0.0422454	0.757921
chr17_22260275_22261642	1.12576	8.01226	5.27944	0.042249	0.757921
chr1_59892581_59893375	-0.436141	5.64554	5.27942	0.0422493	0.757921
chr14_50359099_50360422	-0.609447	5.18589	5.26471	0.0424879	0.761446
chr11_51572540_51572734	3.20492	5.35561	5.26084	0.0425508	0.761446
chr7_87094264_87094993	-0.383051	5.88967	5.25862	0.0425871	0.761446
chr5_146257680_146258467	-0.431254	5.43577	5.47786	0.042601	0.761446
chr3_142297231_142298052	-0.432362	5.39971	6.13679	0.042601	0.761446
chr17_59486752_59487140	0.334571	7.18123	5.25757	0.0426042	0.761446
chr1_199212548_199212901	-0.508012	5.75546	5.25749	0.0426055	0.761446
chr1_174083932_174084489	-0.405077	5.57041	5.58748	0.0427537	0.763684
chrX_138027299_138027896	-0.506973	5.08519	5.42026	0.042921	0.765594
chr9_gl000199_random_57054_57335	1.27891	7.83385	5.23775	0.0429294	0.765594
chr4_171726373_171726866	-1.02777	5.01494	5.23774	0.0429294	0.765594
chr7_64954307_64955025	0.73047	6.24508	5.236	0.0429581	0.765696
chr6_58776255_58779533	0.729732	9.39949	5.23064	0.0430467	0.766865
chr7_112121884_112122383	-0.471326	5.8076	5.22782	0.0430933	0.767285
chr2_178483142_178483956	-0.391697	6.00712	5.22069	0.0432115	0.768698
chr8_107777475_107777771	-0.383871	6.08498	5.22002	0.0432226	0.768698
chr10_42544521_42545269	0.974462	6.93092	5.21852	0.0432475	0.768698
chr11_82867380_82868373	-0.365051	7.16071	5.21747	0.043265	0.768698
chr8_129756830_129757530	-0.410023	5.4865	5.57334	0.0433133	0.768698
chr11_114309974_114310938	-0.616596	5.35576	5.21357	0.04333	0.768698
chr3_37636654_37637214	-0.574291	5.10612	5.21334	0.0433338	0.768698
chr6_113815179_113815608	-0.522927	5.05455	5.21089	0.0433747	0.769013
chr7_78685203_78685779	-0.515207	5.30173	5.20924	0.0434021	0.769091
chr16_29937128_29938058	0.4484	5.51626	5.20568	0.0434617	0.769446
chr2_208030645_208031723	-0.606845	6.13326	5.20528	0.0434683	0.769446
chrUn_gl000225_81816_82309	0.501987	6.84721	5.20372	0.0434945	0.769502
chr4_128981868_128983620	-0.596952	5.15907	5.20047	0.043549	0.770057
chr7_135799903_135800467	-0.409587	5.31039	5.19071	0.0437128	0.772546
chr2_153573714_153575639	-0.635665	5.92233	5.18735	0.0437695	0.773138
chr2_11294866_11295940	-0.386511	5.70148	6.51579	0.0438895	0.774846
chr7_38403094_38403279	-0.959203	5.52029	5.17726	0.0439401	0.774924
chr12_100557528_100558065	-0.415383	5.52316	6.3297	0.0439403	0.774924
chr3_111793623_111794346	0.442881	5.81445	5.17553	0.0439694	0.775027
chr5_156569381_156570495	-0.351722	6.88091	5.16923	0.0440764	0.776504
chr9_132388170_132388905	2.25521	4.41577	5.15893	0.044252	0.779186
chr12_65996244_65996815	-0.478697	5.11822	5.42761	0.0443421	0.779909
chr3_141867777_141868600	-0.506782	5.02122	5.50902	0.0443613	0.779909
chr1_220219445_220220386	-0.348619	5.7778	5.39987	0.0443632	0.779909
chr7_120497530_120498533	-0.43775	5.57004	7.6471	0.0444878	0.781688
chr15_33494081_33494402	-0.435945	5.73728	5.13998	0.0445774	0.78285
chr9_69963608_69963780	2.43258	5.25271	5.13237	0.0447089	0.784745
chr1_242292348_242292902	-1.89161	4.71091	5.12122	0.0449023	0.787727
chr2_166809821_166810822	-0.324554	6.80887	5.11912	0.0449389	0.787953
chr1_189898625_189899068	-0.574311	4.95756	5.10676	0.0451548	0.791324
chr2_92324065_92324654	0.865225	7.82808	5.10301	0.0452206	0.79206
chr13_23786866_23787389	-0.57881	4.95614	5.0945	0.0453702	0.794174
chr8_107282092_107282828	-0.324453	7.54346	5.09344	0.0453888	0.794174
chr2_177661397_177661907	-0.620303	5.12009	5.08775	0.0454894	0.795515
chr19_49866716_49867150	0.71553	4.96896	5.08503	0.0455374	0.795939
chr6_2158941_2159165	-2.53544	4.53261	5.08144	0.045601	0.796218
chr6_13574454_13575659	-0.455939	5.1611	5.14783	0.0456169	0.796218
chr1_121357842_121358079	1.96839	6.22196	5.08009	0.045625	0.796218
chr12_72125674_72126205	-0.410256	5.44989	5.56642	0.0457041	0.797182
chr2_109252854_109253293	-0.481856	5.4767	5.06474	0.0458982	0.799933
chr7_98099808_98100424	0.73191	4.81721	5.06409	0.0459098	0.799933
chr1_197743855_197745127	-0.375082	5.76157	5.70858	0.0459888	0.800892
chr7_19891068_19891501	-0.557267	4.94919	5.05348	0.0460999	0.802076
chr6_125523142_125523665	-0.483978	5.15811	5.0532	0.0461049	0.802076
chr2_437806_438295	-0.382805	5.4477	5.0502	0.0461589	0.802597
chr10_42534549_42534774	0.974735	8.11859	5.04856	0.0461884	0.802692
chr3_169039199_169039563	-0.484572	5.09263	5.04255	0.0462967	0.803974
chr17_58513064_58513729	0.537812	6.52353	5.03965	0.0463491	0.803974
chr11_66035650_66036200	1.17891	4.86387	5.03943	0.046353	0.803974
chr2_215175164_215176164	-0.549104	5.38657	5.03913	0.0463586	0.803974
chr19_gl000208_random_89703_91047	0.968966	5.38922	5.03696	0.0463978	0.804036
chr9_11064920_11065461	-0.379582	6.29928	5.03531	0.0464276	0.804036
chr2_92320096_92320729	0.844636	8.39667	5.03382	0.0464546	0.804036
chr2_204443742_204444353	-0.507735	5.70271	5.03361	0.0464585	0.804036
chrX_142203128_142203775	-0.493634	5.44633	5.03188	0.0464899	0.804162
chr1_145208688_145210298	0.830027	6.00306	5.02615	0.0465941	0.805546
chr3_40494383_40495044	-0.351609	5.90449	5.40066	0.0466462	0.80603
chr1_164095637_164096290	-0.397723	6.50238	5.01968	0.0467118	0.806746
chr2_113956318_113957000	0.5334	4.96914	5.01556	0.0467871	0.807202
chr11_82205877_82206510	-0.402872	5.55946	5.86699	0.0468022	0.807202
chr2_12003640_12004116	-0.434847	5.43205	5.33196	0.0468108	0.807202
chr9_66571374_66571886	0.432404	5.20457	5.00404	0.0469985	0.81002
chr1_116255781_116256216	-0.41791	5.89029	5.00034	0.0470666	0.810774
chr16_3450743_3451545	0.551241	5.32913	4.99806	0.0471085	0.811078
chr2_31712141_31712678	-0.417646	5.50149	4.99335	0.0471955	0.812157
chr7_116166067_116166772	-1.03029	5.10104	4.99034	0.0472512	0.812696
chr12_50100998_50101692	0.497582	4.95334	4.9877	0.0473001	0.81289
chr7_21590775_21591220	-0.5249	5.08994	4.98704	0.0473123	0.81289
chr5_145826417_145827411	-0.463213	6.7714	4.98578	0.0473356	0.81289
chr8_43837150_43837745	1.07094	6.20753	4.98077	0.0474286	0.813917
chr21_10084982_10086726	0.678389	6.03651	4.97994	0.0474441	0.813917
chr17_57082168_57082880	0.463705	6.29856	4.97634	0.0475112	0.81398
chr7_24755409_24755940	-1.16439	5.07944	4.97614	0.0475148	0.81398
chr9_103790557_103791750	-0.380545	6.05107	4.97581	0.047521	0.81398
chrUn_gl000225_99249_99549	2.18596	5.72986	4.97217	0.0475888	0.814723
chr1_231376678_231377326	0.509766	5.0767	4.96813	0.0476644	0.815303
chr3_103821287_103821589	-1.85502	4.67424	4.96593	0.0477056	0.815303
chr5_159935730_159936244	-0.443857	5.45379	4.96571	0.0477097	0.815303
chr2_154085567_154086183	-1.00562	5.13142	4.96473	0.047728	0.815303
chr8_91376731_91377022	2.86044	4.28322	4.96383	0.0477449	0.815303
chrX_138240394_138240997	-0.486489	5.30187	4.96068	0.0478039	0.815392
chr1_97603724_97604433	-1.01877	5.15478	4.95987	0.0478192	0.815392
chr1_114825177_114825886	-0.312034	7.48191	4.95931	0.0478297	0.815392
chr1_149035264_149035457	2.16471	5.40189	4.95576	0.0478964	0.815392
chr4_144695093_144695636	-0.400691	5.69193	5.49467	0.0479054	0.815392
chr7_122995755_122996268	-0.428634	5.73828	4.95472	0.047916	0.815392
chr10_80062791_80063406	0.664765	4.97163	4.95445	0.0479211	0.815392
chr2_211367667_211368197	-0.492116	5.21419	4.9496	0.0480125	0.816531
chr4_134831062_134831897	-0.418824	5.30538	4.93718	0.0482476	0.820111
chr1_3816367_3818126	-0.540888	5.05615	4.93123	0.0483607	0.821065
chr1_198025374_198026000	-1.43578	5.07455	4.93063	0.048372	0.821065
chr9_128023723_128024446	0.605598	4.86382	4.93034	0.0483776	0.821065
chr14_59950304_59951507	-0.440832	6.43099	4.92724	0.0484366	0.82165
chr6_146349217_146349775	-0.46234	5.23647	6.27515	0.0485195	0.822536
chr8_110703680_110704416	-0.438368	5.88478	4.92109	0.0485541	0.822536
chr4_178363166_178363762	-0.447554	5.63921	4.92064	0.0485628	0.822536
chr1_78245090_78245884	-0.596207	5.09675	4.91472	0.0486761	0.823632
chr4_146100791_146102345	-0.404655	5.70168	4.91468	0.0486769	0.823632
chr12_81661816_81662628	-0.373899	5.69558	4.90996	0.0487677	0.824457
chr20_23763031_23763500	-0.536441	4.89951	4.94066	0.0488008	0.824457
chr20_53072905_53073785	0.375146	7.93787	4.90784	0.0488084	0.824457
chr12_77458960_77459948	-0.369665	6.60257	4.90701	0.0488245	0.824457
chr4_108745442_108746633	-0.729541	5.44035	4.90444	0.0488739	0.824873
chr21_30257306_30257784	0.392187	5.61519	5.29954	0.0490118	0.826411
chr17_60780865_60781867	0.510429	5.03171	4.89557	0.0490454	0.826411
chr5_10780430_10780827	-1.06977	4.90967	4.89467	0.0490628	0.826411
chr17_59296622_59297166	0.423989	6.29546	4.8946	0.0490641	0.826411
chr14_58338176_58338494	-2.86889	4.3034	4.89309	0.0490933	0.826487
chr7_57551243_57551534	2.44874	5.41093	4.889	0.0491727	0.827237
chr7_116311873_116312557	-0.402094	5.5943	5.69383	0.0491875	0.827237
chr7_142551728_142552858	-0.707617	4.86577	4.88478	0.0492548	0.827755
chr2_54557457_54558252	-0.40592	6.10383	4.88411	0.0492679	0.827755
chr16_84733104_84734069	0.600802	5.09566	4.88264	0.0492964	0.827765
chr1_241912511_241913897	-0.629685	4.9111	4.88025	0.049343	0.827765
chr11_62389064_62389957	0.594028	5.07295	4.87676	0.0494113	0.827765
chr3_28328041_28328355	-2.52885	4.50232	4.8758	0.0494299	0.827765
chr4_35910177_35910670	-0.45204	5.21112	4.87548	0.0494362	0.827765
chr10_3214684_3215736	-0.318095	6.74728	4.87168	0.0495106	0.827765
chr4_68265186_68266733	0.989926	8.54292	4.87099	0.0495242	0.827765
chr2_119079194_119079686	0.74488	4.97571	4.87005	0.0495425	0.827765
chr2_17352637_17353053	-0.457589	5.84668	4.86919	0.0495593	0.827765
chr9_764080_764468	-0.529996	6.0153	4.86899	0.0495633	0.827765
chr6_128841062_128842305	-0.567313	5.32262	4.86858	0.0495714	0.827765
chr1_200378537_200380191	-0.611622	5.73961	4.86842	0.0495745	0.827765
chr16_14164731_14165542	0.638888	4.87177	4.86758	0.049591	0.827765
[truncated: 31,368 more rows]

## Sheet: GTC365
Peak (chr_start_end)	logFC	logCPM	F	PValue	FDR
chr8_46852294_46852905	10.2096	6.88049	452.683	6.05838e-08	0.00160653
chrUn_gl000225_67249_68352	3.35454	8.83643	150.935	1.52125e-07	0.00160653
chrUn_gl000225_81111_81494	9.53156	6.22527	324.829	2.04272e-07	0.00160653
chrUn_gl000220_130608_131326	11.8119	8.46125	322.633	2.09395e-07	0.00160653
chr17_59954355_59954846	8.42833	5.19607	312.649	2.34848e-07	0.00160653
chrUn_gl000225_51840_52213	9.47519	6.17212	293.171	2.9692e-07	0.00160653
chr17_58844997_58846256	8.48815	5.24114	290.193	3.0817e-07	0.00160653
chr10_42393012_42393437	11.0081	7.66624	277.409	3.63099e-07	0.00165628
chrUn_gl000224_3756_4553	9.91563	6.59478	234.586	6.67493e-07	0.00270646
chr1_142542100_142542747	9.53873	6.23105	207.912	1.03289e-06	0.00376924
chr2_92309969_92310301	10.6993	7.36135	199.661	1.19541e-06	0.00396571
chr20_29831903_29832142	8.06925	4.86622	188.803	1.46219e-06	0.00444652
chr8_46844104_46844455	8.94052	5.65274	180.148	1.73102e-06	0.00485909
chr2_89858859_89859293	8.688	5.44085	174.965	1.92234e-06	0.00501071
chr20_53535851_53536721	7.98514	4.79183	150.866	3.26745e-06	0.00794905
chr3_61863015_61863337	-7.88809	4.70117	134.872	4.86958e-06	0.0111063
chr8_43822077_43822581	9.12087	5.82588	130.777	5.43262e-06	0.0116616
chr10_42799538_42799788	7.8782	4.69815	117.266	7.98915e-06	0.0161967
chr6_61911434_61911859	7.90314	4.71678	110.477	9.85561e-06	0.018929
chr2_87655630_87655856	8.10485	4.89228	99.5358	1.42043e-05	0.0259171
chr12_34833894_34834380	7.81464	4.64081	98.073	1.49579e-05	0.0259926
chr8_111072452_111073182	-0.937122	6.70486	46.5491	3.70273e-05	0.0614182
chr8_128323779_128324435	-1.32242	6.25564	46.0535	3.87875e-05	0.0615406
chrUn_gl000231_18780_19090	7.65957	4.50698	71.7189	4.40711e-05	0.0648305
chr1_221914990_221916737	-1.09648	6.42115	44.4801	4.50756e-05	0.0648305
chr6_141398667_141399127	-1.26599	5.51012	44.2284	4.61908e-05	0.0648305
chr6_12011253_12012051	-1.24796	5.40485	43.7267	4.85134e-05	0.0655686
chr7_132766290_132767208	-0.962922	6.3456	42.9995	5.21326e-05	0.0679437
chr1_241802939_241804388	-0.922765	5.79493	42.4982	5.48156e-05	0.0686262
chr2_183580136_183581626	-0.954181	6.09239	42.122	5.69374e-05	0.0686262
chr2_230138395_230138744	-0.953933	5.67902	41.8894	5.8298e-05	0.0686262
chr1_77436908_77437101	-8.2507	5.05111	62.6454	6.97267e-05	0.0795146
chr11_585236_585646	7.6834	4.52828	61.9476	7.24087e-05	0.0800708
chr5_114879994_114880903	-0.812232	6.47938	39.3298	7.6161e-05	0.0817432
chrX_106567895_106568496	-1.17075	5.51039	38.6887	8.16136e-05	0.0843464
chr20_53433860_53434950	0.85329	6.97807	38.0516	8.74999e-05	0.0843464
chr3_185826725_185827291	-0.923085	6.51084	38.0472	8.75421e-05	0.0843464
chr7_132937580_132938530	-0.946207	5.97172	37.5097	9.29081e-05	0.0843464
chr1_219347024_219347690	-0.906915	6.65578	37.264	9.54912e-05	0.0843464
chr14_51561590_51562328	-0.845976	6.75785	37.2157	9.60089e-05	0.0843464
chr8_126441695_126442830	-0.90737	7.50809	37.1739	9.64602e-05	0.0843464
chr9_82186176_82186897	-0.935708	6.01622	37.117	9.70774e-05	0.0843464
chr9_85781154_85781884	-1.30568	5.31722	36.3343	0.000106073	0.0873147
chr7_89348189_89348737	-1.07522	5.80947	36.1342	0.00010853	0.0873147
chr2_208393953_208395063	-0.760415	6.21193	36.1136	0.000108788	0.0873147
chrY_234152_234745	1.05815	5.26955	35.6961	0.00011415	0.0873147
chr20_58146531_58146949	-7.52078	4.37816	54.0242	0.000114441	0.0873147
chr1_197169835_197171196	-0.822407	6.95761	35.5019	0.000116753	0.0873147
chr4_144695093_144695636	-1.06853	5.50251	35.4659	0.000117243	0.0873147
chr2_163200151_163201135	-0.776518	7.10234	35.1664	0.000121417	0.088194
chr7_24005_24476	7.53554	4.40093	52.3808	0.000126784	0.088194
chr15_89089478_89090098	-0.840808	6.15116	34.7672	0.00012726	0.088194
chr9_79521007_79521595	-1.26128	5.3019	34.7122	0.000128091	0.088194
chr3_142585714_142586113	-0.86171	6.1006	34.302	0.000134496	0.0900981
chr7_57992503_57992930	7.52825	4.39478	50.9989	0.000138498	0.0900981
chr8_127353765_127354436	-0.867331	6.47381	33.8393	0.000142186	0.0900981
chr1_65933109_65933788	-1.00434	5.84243	33.7929	0.000142986	0.0900981
chr3_38065655_38066810	-0.924048	6.15954	33.7805	0.000143201	0.0900981
chrX_149106497_149107089	-0.922011	6.05825	33.5393	0.000147453	0.0912007
chr11_19262077_19263199	-0.878571	5.71337	32.9711	0.00015808	0.0961441
chr7_38407692_38408050	-0.780379	6.20651	32.622	0.000165063	0.0987455
chr12_66695808_66696707	-0.83748	6.47219	32.0425	0.000177484	0.100968
chr3_17783530_17784741	-0.788009	7.33554	31.9629	0.000179274	0.100968
chr7_116363818_116364552	-0.910447	5.72062	31.9604	0.000179331	0.100968
chr20_52468381_52469272	0.84288	6.80829	31.8522	0.000181803	0.100968
chr6_112194121_112195023	-0.70438	6.38661	31.8171	0.000182612	0.100968
chrY_13868949_13870022	3.95197	6.24487	31.4058	0.000192437	0.103611
chr1_200059559_200060417	-1.007	5.35938	31.2854	0.000195433	0.103611
chr2_19005527_19006043	-1.00152	5.37198	31.1256	0.000199493	0.103611
chr1_68150615_68151450	-0.901133	6.3459	31.0452	0.000201575	0.103611
chr3_40494383_40495025	-0.907308	5.73731	30.9052	0.000205262	0.103611
chr7_23053234_23054038	-0.677673	6.51745	30.8344	0.000207156	0.103611
chr2_211034996_211036793	-0.790015	6.15433	30.8302	0.000207268	0.103611
chr8_128577317_128577537	-7.44558	4.31582	44.8231	0.000211372	0.104125
chrX_125606347_125607248	-1.49817	8.40049	30.5848	0.000214002	0.104125
chr8_133787278_133788133	-0.833694	6.2597	30.4699	0.000217247	0.104313
chr20_46523475_46524804	2.02229	7.39502	30.2518	0.000223564	0.105952
chr2_90375247_90376438	7.47752	4.35128	43.4162	0.000234404	0.109665
chr2_210866931_210867952	-0.868901	6.42506	29.5637	0.000244984	0.109738
chr4_147866648_147867531	-0.848396	6.23086	29.4854	0.000247575	0.109738
chr7_133811868_133812511	-0.996103	5.74351	29.445	0.000248924	0.109738
chr2_166809812_166810822	-0.689061	6.70085	29.3866	0.000250888	0.109738
chr2_209346914_209347960	-0.991252	5.512	29.3751	0.000251278	0.109738
chr4_147442605_147444203	-0.765117	5.65536	29.3361	0.000252604	0.109738
chr1_172501381_172502902	-0.796938	6.94504	29.2287	0.000256297	0.109867
chr1_120601587_120602194	7.41758	4.30093	42.0993	0.000258921	0.109867
chr7_134331116_134331973	-0.848106	6.83442	28.993	0.00026463	0.110076
chr4_49122437_49123299	1.39657	6.96674	28.9703	0.000265448	0.110076
chr6_144536791_144537976	-0.925186	5.93791	28.569	0.000280447	0.11163
chr5_136410931_136411302	-0.810902	6.12411	28.4651	0.000284493	0.11163
chr7_142985053_142985790	-0.819892	5.68537	28.421	0.000286234	0.11163
chr8_10696463_10697828	-0.766197	5.8378	28.3044	0.000290889	0.11163
chr12_100241670_100242227	-0.955648	5.87989	28.2867	0.000291605	0.11163
chr11_18417416_18418021	-0.699671	5.64486	28.2606	0.000292664	0.11163
chr2_208634038_208634994	-0.877133	5.78673	28.2417	0.000293433	0.11163
chr3_189838352_189839017	-0.887872	5.39402	28.236	0.000293666	0.11163
chr9_79791879_79792917	-0.936622	5.91458	27.9114	0.000307274	0.114947
chr4_123073148_123074212	-0.752303	5.87607	27.8785	0.000308693	0.114947
chr1_176918060_176918517	-0.804701	6.13805	27.6795	0.000317456	0.116253
chr14_36414165_36414361	-7.37357	4.25364	39.3974	0.000320339	0.116253
chr16_33866082_33867337	1.84852	7.08431	27.5842	0.000321757	0.116253
chr8_119560640_119561471	-0.82058	5.56709	27.437	0.000328536	0.117539
chr4_160023742_160025193	-0.772321	5.72776	27.2784	0.000336034	0.119054
chr11_102979811_102980630	-0.964375	5.34153	26.9744	0.000350982	0.121388
chrX_106209574_106210303	-0.92858	6.39105	26.9316	0.000353153	0.121388
chr9_141122262_141122908	7.40857	4.29391	38.1713	0.0003543	0.121388
chr4_114468685_114469185	-0.749171	6.18371	26.8196	0.0003589	0.121388
chr2_89233526_89233810	-7.35148	4.23464	37.833	0.000364466	0.121388
chr3_192314993_192316173	-0.788883	5.80754	26.6909	0.000365646	0.121388
chr6_167040325_167041513	-0.969656	5.34563	26.5826	0.000371439	0.121388
chr1_197115030_197116268	-0.638406	6.64721	26.5773	0.000371722	0.121388
chr8_128747413_128748755	-0.778437	5.91161	26.5475	0.000373336	0.121388
chr4_171726373_171726866	-1.0015	5.07118	26.5008	0.000375888	0.121388
chr10_135499762_135501383	1.37593	6.75523	26.2131	0.000392042	0.124087
chr9_88356053_88357395	-0.641637	6.08888	26.175	0.000394245	0.124087
chr6_136571033_136571977	-0.78748	5.97472	26.1715	0.000394445	0.124087
chrX_130036833_130037517	-0.706663	5.97579	26.0466	0.000401771	0.124386
chrUn_gl000225_116498_117206	1.15462	8.16353	26.033	0.000402581	0.124386
chr18_107855_109537	1.46467	9.56765	25.9787	0.000405824	0.124386
chrUn_gl000225_130194_130930	1.29143	7.68629	25.798	0.000416843	0.124386
chr8_109594757_109595047	-0.764701	6.10935	25.7744	0.000418305	0.124386
chr1_62901646_62902887	-0.69662	6.08114	25.7217	0.000421604	0.124386
chrUn_gl000220_93105_94085	-0.685815	6.61256	25.6981	0.00042309	0.124386
chr2_33823641_33824933	-0.716253	6.56804	25.6808	0.000424179	0.124386
chrY_13488515_13489966	1.80595	6.82432	25.6238	0.000427804	0.124386
chr3_64597991_64599279	0.64909	6.25463	25.5976	0.000429482	0.124386
chr7_33168514_33169665	-0.710749	7.15414	25.5015	0.000435708	0.125109
chrUn_gl000235_244_1277	1.21855	6.00253	25.4177	0.000441223	0.125109
chr4_159823530_159824181	-0.814716	5.47249	25.402	0.000442264	0.125109
chr9_102860511_102862199	-0.65825	6.5881	25.0705	0.000464973	0.129689
chr7_89840786_89841691	-0.791719	6.46754	25.0622	0.000465561	0.129689
chr1_209920983_209921508	-0.866706	6.30352	24.8782	0.000478791	0.131533
chr12_86769784_86770149	-7.32398	4.20986	34.6854	0.000479389	0.131533
chr15_101142066_101143470	-0.769035	6.02805	24.5734	0.0005017	0.133927
chr8_130951500_130952630	-0.713636	5.76831	24.5551	0.000503115	0.133927
chr2_134399020_134399611	-0.759832	6.35325	24.444	0.000511826	0.133927
chr1_60280075_60281059	-0.832483	6.44328	24.3563	0.00051882	0.133927
chr6_126307357_126308295	-0.761429	6.34911	24.3152	0.00052214	0.133927
chr2_190525760_190526585	-0.693951	6.20509	24.2944	0.000523829	0.133927
chr8_118532284_118533378	-0.720095	6.23031	24.2708	0.000525755	0.133927
chr9_140222447_140222894	7.34527	4.24189	33.6487	0.000527107	0.133927
chrUn_gl000225_111114_111754	1.14501	8.21496	24.2383	0.000528418	0.133927
chr2_211341004_211341750	-0.763731	6.43621	24.2071	0.000530989	0.133927
chr1_217804054_217805163	-0.626238	6.59802	24.1795	0.000533277	0.133927
chr10_91010986_91011959	-0.790286	6.16855	24.1567	0.000535177	0.133927
chr4_49100196_49100876	1.3647	7.39069	24.149	0.000535824	0.133927
chr1_209826259_209826711	-0.802637	5.41168	24.0243	0.000546371	0.133954
chrUn_gl000216_154333_155571	1.1419	8.68169	23.9366	0.000553937	0.133954
chr14_53018767_53020165	-0.613818	6.83548	23.896	0.000557477	0.133954
chr17_59910648_59911843	0.800382	7.53298	23.8471	0.000561789	0.133954
chrUn_gl000225_110277_110861	1.2242	8.09319	23.8376	0.000562623	0.133954
chr1_183129071_183129648	-0.752047	6.18031	23.8076	0.000565297	0.133954
chr10_85899030_85899786	-0.976349	5.5634	23.7696	0.000568689	0.133954
chr18_77005536_77006818	-0.677596	6.87476	23.7459	0.00057082	0.133954
chrUn_gl000225_21576_21953	1.22822	7.65276	23.655	0.000579093	0.133954
chr2_1135993_1136381	-0.937827	5.70611	23.6441	0.000580093	0.133954
chr10_131908192_131910088	-0.708871	6.22707	23.6408	0.00058039	0.133954
chr4_141294002_141295209	-0.726222	5.98007	23.589	0.000585179	0.133954
chr7_83176744_83177455	-0.886018	5.924	23.5811	0.000585912	0.133954
chrX_284021_284744	0.996255	5.2559	23.4936	0.00059412	0.133954
chr9_20683882_20684936	-0.635421	5.91356	23.4693	0.000596426	0.133954
chr9_111881365_111882590	-0.753593	5.93568	23.4507	0.000598201	0.133954
chrY_58980384_58980789	1.27311	7.2975	23.4492	0.000598335	0.133954
chr12_90102347_90103984	-0.685818	6.04915	23.4063	0.000602451	0.134053
chr4_163084973_163085696	-0.791555	5.67439	23.3563	0.000607282	0.134309
chr1_197871330_197872387	-0.686764	6.81632	23.2813	0.00061461	0.135111
chr6_163148313_163149202	-0.797884	6.21415	23.1908	0.000623603	0.136267
chr3_180319657_180320582	-0.779286	5.86694	22.9176	0.000651704	0.140253
chr2_15043837_15044326	-0.959211	5.58042	22.9061	0.000652921	0.140253
chr2_7062505_7062871	-0.7203	5.6775	22.9018	0.000653378	0.140253
chr1_235667148_235668744	-0.835932	5.90881	22.8442	0.000659515	0.140743
chr2_165849407_165849803	-7.26478	4.16074	31.182	0.000667433	0.140995
chr4_174529513_174531039	-0.875036	5.67492	22.7538	0.000669286	0.140995
chr7_93632937_93634208	-0.76984	6.12338	22.7181	0.000673182	0.140995
chr12_104359453_104360016	-0.731782	5.57567	22.6911	0.000676154	0.140995
chr7_121783698_121784673	-0.647125	6.1455	22.6259	0.000683395	0.141696
chr20_25603980_25605169	0.820252	5.397	22.5132	0.000696133	0.141801
chr4_159592219_159593891	-0.763849	6.69178	22.4841	0.000699468	0.141801
chr7_137638424_137639138	-0.869078	5.65048	22.4651	0.000701652	0.141801
chr8_128508620_128509260	-3.76068	5.58389	22.4228	0.000706558	0.141801
chrY_13650523_13651397	1.14262	6.58319	22.4176	0.000707164	0.141801
chrUn_gl000225_33308_34068	1.14849	7.90534	22.4171	0.000707219	0.141801
chr3_157324281_157324782	-0.864042	5.62838	22.3652	0.000713289	0.142237
chr12_75784491_75785344	-0.713096	7.29523	22.2831	0.000723027	0.142833
chr6_8590637_8590880	-7.23605	4.13891	30.2845	0.000730103	0.142833
chr15_33486728_33487400	-0.721498	5.94909	22.1611	0.000737787	0.142833
chr4_149363196_149364130	-0.710559	6.26977	22.1358	0.000740897	0.142833
chr3_156272524_156273438	-0.807913	7.05961	22.1226	0.000742526	0.142833
chr2_198569662_198570920	-0.780072	5.99535	22.1194	0.000742917	0.142833
chrUn_gl000225_13558_14514	1.41797	7.70165	22.1133	0.000743675	0.142833
chr3_9140406_9140671	-7.24389	4.14751	30.0051	0.000751121	0.143228
chr5_134977205_134978094	-1.17485	5.4106	22.0005	0.000757775	0.143228
chr1_81719926_81720472	-7.23867	4.13816	29.9071	0.000758678	0.143228
chr8_131369530_131371293	-0.804549	5.46468	21.9285	0.000766948	0.143228
chr3_33481608_33482831	-0.749629	6.20112	21.8622	0.0007755	0.143228
chr2_203879096_203880190	-0.648961	5.93286	21.8583	0.000776012	0.143228
chr2_191183965_191184847	-0.761497	6.51229	21.837	0.000778793	0.143228
chr3_63264873_63265733	7.23162	4.14443	29.6054	0.000782558	0.143228
chr5_165768811_165769036	-7.23601	4.13693	29.506	0.00079063	0.143228
chr8_118773428_118773946	-7.21991	4.12462	29.4411	0.000795957	0.143228
chr2_215673866_215675208	-0.65603	6.6635	21.6525	0.000803346	0.143228
chr1_207226195_207227092	-0.677496	6.82639	21.58	0.00081324	0.143228
chrX_122703715_122704505	-0.917326	5.10425	21.5384	0.000818985	0.143228
chr4_114682316_114684243	-0.940939	5.56388	21.4972	0.000824723	0.143228
chr2_205124927_205125282	-7.21724	4.12103	29.098	0.0008249	0.143228
chr8_92081847_92082987	-0.678063	7.04676	21.4957	0.000824942	0.143228
chr17_51183157_51183744	-1.24969	8.90432	21.4884	0.000825959	0.143228
chrUn_gl000225_81803_82316	1.18294	7.31056	21.4327	0.000833809	0.143228
chr7_38451062_38451463	-7.21189	4.11765	28.9734	0.000835737	0.143228
chr7_32886155_32886549	-0.708458	6.22725	21.4115	0.000836821	0.143228
chr12_68725696_68726478	-0.668045	6.27291	21.4077	0.000837357	0.143228
chr2_192542155_192543678	-1.12979	5.8302	21.4064	0.000837548	0.143228
chr7_111201965_111202954	-0.684766	6.35515	21.3888	0.000840059	0.143228
chr1_223254544_223255012	-0.819867	5.46398	21.3678	0.000843073	0.143228
chr3_24130227_24130535	-7.23617	4.13942	28.8629	0.000845507	0.143228
chrX_150066584_150068165	-0.989262	5.50606	21.3351	0.000847779	0.143228
chr21_10085025_10087729	1.3796	6.43634	21.1919	0.000868792	0.146101
chr14_90420805_90421338	-0.675579	6.26883	21.1456	0.000875704	0.146588
chr5_94982093_94982996	-0.642929	6.37996	21.1035	0.000882069	0.146979
chr2_162137560_162138463	1.04287	6.09132	20.9847	0.000900292	0.149334
chrUn_gl000225_49769_50164	1.14108	7.50855	20.8667	0.000918843	0.151721
chr17_59548039_59548342	-9.23409	5.90934	28.0157	0.000925407	0.151848
chr5_83731612_83732257	1.1628	5.52788	20.7187	0.000942755	0.151848
chrY_13485183_13485756	1.25599	8.10705	20.696	0.000946488	0.151848
chr6_121508570_121509621	-0.785847	6.10997	20.6762	0.000949772	0.151848
chr1_214776196_214776811	-0.71461	5.53134	20.6673	0.000951232	0.151848
chr2_208094890_208095385	-7.19516	4.10334	27.7512	0.000952305	0.151848
chr12_89619339_89620121	-0.829026	5.44462	20.6513	0.000953905	0.151848
chr2_49456771_49456981	-1.24254	8.68093	20.6351	0.000956591	0.151848
chr16_33874008_33874558	3.23077	5.29967	20.6324	0.000957058	0.151848
chr2_84331008_84331673	0.751138	5.68599	20.4527	0.000987651	0.155177
chr7_35064788_35065865	-1.00936	5.29586	20.423	0.000992813	0.155177
chr20_52743519_52743920	-8.96024	5.63564	27.3606	0.000993862	0.155177
chr3_131753296_131754130	-0.734786	5.52578	20.39	0.000998593	0.155177
chrUn_gl000225_131568_131974	1.05002	8.34009	20.3791	0.00100052	0.155177
chrUn_gl000225_24821_26002	1.26065	7.93474	20.3619	0.00100355	0.155177
chr2_138646513_138646754	-7.20695	4.11134	27.1368	0.00101872	0.156316
chr1_243418181_243419661	-0.577073	6.43206	20.2074	0.0010313	0.156316
chr16_46407650_46408713	3.66067	6.64121	20.2024	0.00103223	0.156316
chr6_62284042_62284207	-12.001	8.64859	27.0106	0.00103308	0.156316
chr21_10789996_10790313	3.18666	5.57968	20.1835	0.00103569	0.156316
chr5_95296523_95297951	-0.614329	6.113	20.1155	0.00104827	0.156316
chr20_52373989_52374554	0.557523	7.26763	20.1004	0.00105107	0.156316
chr7_142171933_142172487	-0.699135	5.48277	20.0886	0.0010533	0.156316
chr6_116822059_116822689	-0.789472	5.28979	20.0821	0.0010545	0.156316
chr8_135844234_135845414	-0.712011	6.81107	20.0758	0.00105568	0.156316
chrUn_gl000225_74310_74903	1.08331	7.93079	20.0633	0.00105804	0.156316
chr8_134583797_134584955	-0.685156	5.7895	20.0223	0.0010658	0.156827
chr1_207494400_207495474	-0.601069	6.63838	19.9934	0.0010713	0.157004
chr1_186649170_186649890	-0.632314	5.7651	19.9675	0.00107628	0.157058
chr8_112248361_112248992	-0.635706	6.38481	19.9077	0.00108784	0.157058
chr12_88535445_88536730	-0.641154	6.56763	19.9068	0.00108801	0.157058
chr7_86688301_86689549	-0.566227	6.39429	19.8941	0.00109049	0.157058
chr7_116311873_116312557	-0.758651	5.4963	19.8803	0.00109319	0.157058
chr7_143824895_143825144	-0.759229	5.6111	19.7837	0.00111231	0.158902
chrY_13480171_13480417	3.33695	6.09632	19.7715	0.00111474	0.158902
chr8_112265128_112265803	0.581635	5.7454	20.4035	0.00112296	0.159452
chr4_165638032_165638517	-7.16239	4.07743	26.1979	0.001132	0.159967
chr7_121203378_121203749	-7.17653	4.08512	26.1341	0.00114027	0.159967
chr6_143771200_143772425	-0.789764	5.52935	19.6087	0.00114796	0.159967
chr11_124040989_124042158	-0.730653	5.77687	19.595	0.0011508	0.159967
chr1_172697031_172697438	-1.11078	5.3048	19.564	0.00115728	0.159967
chr6_154664713_154665782	-0.664371	7.0424	19.5491	0.00116041	0.159967
chr1_178994655_178995820	-0.748145	5.87921	19.5488	0.00116047	0.159967
chr18_109717_110101	1.18063	7.55627	19.5265	0.00116517	0.159967
chr8_124084493_124085375	-0.597065	6.76672	19.5224	0.00116604	0.159967
chrUn_gl000225_92098_93162	1.34465	6.94684	19.479	0.00117526	0.16015
chr4_141444848_141445804	-0.740175	6.25085	19.469	0.00117741	0.16015
chr1_59011875_59012668	-0.675091	6.04554	19.4543	0.00118054	0.16015
chr3_107940808_107941843	-0.666101	6.08794	19.4242	0.00118704	0.160435
chrUn_gl000225_133684_133913	1.16907	8.1101	19.3468	0.00120391	0.161775
chr16_79804201_79804876	-0.654812	5.7773	19.3381	0.00120582	0.161775
chr10_42387693_42387984	11.202	7.85623	25.5689	0.00121696	0.162671
chr14_105266850_105267550	-7.14822	4.06253	25.476	0.00123017	0.163569
chr6_116433060_116433438	-7.16764	4.07709	25.3978	0.00124145	0.163569
chr10_42534500_42535239	1.34567	7.97795	19.1471	0.00124876	0.163569
chr3_154842625_154843321	-0.96047	5.92947	19.0598	0.00126898	0.163569
chr1_60746767_60747544	-0.833729	5.42921	19.0529	0.00127062	0.163569
chr5_154134365_154135557	-0.638626	6.1509	19.0396	0.00127372	0.163569
chr9_68423997_68424964	3.19391	4.9551	19.0289	0.00127623	0.163569
chr4_49104347_49104913	1.41629	7.6129	19.0196	0.00127844	0.163569
chr20_46121778_46123049	0.663565	6.89872	19.0141	0.00127973	0.163569
chr17_25266055_25267926	1.38688	7.49494	19.0082	0.00128114	0.163569
chr4_49652265_49652847	3.38667	6.17316	18.9854	0.00128653	0.163569
chr3_188665230_188665972	-0.961636	5.18296	18.9689	0.00129047	0.163569
chr1_244614784_244615653	-0.616293	6.53492	18.9642	0.0012916	0.163569
chrUn_gl000226_2185_2636	10.5326	7.1929	25.0001	0.00130086	0.163569
chr17_41381640_41382497	1.36801	5.80189	18.8922	0.00130894	0.163569
chr1_207925020_207926200	-1.16175	5.27156	18.8898	0.00130953	0.163569
chr7_7679707_7680868	-0.647433	6.61031	18.8812	0.00131162	0.163569
chr1_181392534_181392961	-0.578071	5.97681	18.8648	0.00131561	0.163569
chr13_67803924_67805599	-0.767082	5.39441	18.8627	0.00131613	0.163569
chr6_5003614_5004616	-0.622253	5.8335	18.857	0.00131752	0.163569
chr4_113033923_113035010	-0.834429	5.12476	18.8509	0.00131901	0.163569
chr16_33887628_33887952	1.22573	7.43864	18.7866	0.00133489	0.163569
chr3_186287967_186288763	-0.808904	6.02496	18.6938	0.00135819	0.163569
chr11_15671442_15672251	-0.728934	5.39499	18.6927	0.00135848	0.163569
chr7_21466526_21468120	-0.563033	6.86966	18.6888	0.00135946	0.163569
chr16_30441166_30441870	0.727979	5.28361	18.6715	0.00136386	0.163569
chr14_99786470_99786799	-7.11933	4.04055	24.5867	0.00136649	0.163569
chr11_6255486_6256733	-0.695187	6.96098	18.6466	0.00137024	0.163569
chr3_167097771_167098446	-0.75561	6.62844	18.6403	0.00137185	0.163569
chr17_25263811_25265683	1.2055	7.60449	18.6357	0.00137303	0.163569
chr7_38375185_38375673	-0.587595	6.33129	18.6256	0.00137564	0.163569
chr2_21021741_21023190	-0.829098	5.43481	18.6148	0.00137843	0.163569
chr3_16305785_16307017	-0.603096	6.86889	18.6139	0.00137865	0.163569
chr1_86173647_86174698	-0.741962	5.50363	18.6068	0.0013805	0.163569
chr1_181002545_181003690	-0.678525	5.70311	18.6058	0.00138076	0.163569
chr4_49155217_49155667	9.99058	6.65686	24.4745	0.00138504	0.163569
chr6_153219042_153219417	-0.720158	5.50992	18.5085	0.00140622	0.165534
chr2_676096_677780	-0.557851	6.64002	18.4556	0.00142029	0.166495
chr10_39121412_39121614	3.31405	6.15255	18.4362	0.00142549	0.166495
chrUn_gl000220_96863_97345	-8.05853	4.83505	24.2212	0.00142807	0.166495
chrUn_gl000225_45950_46449	1.11978	7.26881	18.4062	0.00143358	0.166605
chr12_66563062_66563955	-0.699999	6.10476	18.3703	0.00144334	0.167208
chr3_130745206_130746013	-0.663969	5.58861	18.3534	0.00144796	0.167212
chrY_13460778_13461317	1.19331	7.96068	18.3029	0.00146189	0.168288
chr1_100194433_100194641	-7.09863	4.0254	23.9427	0.00147736	0.169534
chr7_21985091_21986006	-0.616895	5.69627	18.2124	0.00148721	0.169903
chr1_114521510_114521851	-7.88238	4.68591	23.8738	0.00148989	0.169903
chr1_242011081_242011883	-0.630215	6.19141	18.186	0.00149471	0.169921
chrUn_gl000214_64157_65340	1.34167	7.87314	18.1578	0.00150275	0.170306
chrY_13868219_13868749	1.2581	6.85383	18.1201	0.0015136	0.170493
chrY_13680741_13681214	9.17723	5.86881	23.7446	0.00151375	0.170493
chr17_22249568_22249771	9.33545	6.02239	23.6712	0.00152751	0.171014
chr1_91852791_91853105	1.46856	7.73614	18.0714	0.00152775	0.171014
chr16_46389554_46390102	9.58577	6.2657	23.5794	0.00154497	0.1715
chr8_136468911_136470151	-0.747784	5.60921	18.0102	0.00154576	0.1715
chrX_150565125_150566160	-0.590636	5.73252	18.0087	0.00154619	0.1715
chr12_69004158_69005401	-0.803109	5.31386	17.9872	0.00155259	0.171688
chr10_86373036_86373764	-0.738357	5.48209	17.9086	0.0015762	0.173402
chr1_107739563_107740355	-0.636015	5.98597	17.8913	0.00158145	0.173402
chr2_16816850_16817529	-1.00535	4.96485	17.8465	0.00159516	0.173402
chrY_58978502_58979065	9.07667	5.77248	23.3059	0.00159846	0.173402
chrUn_gl000225_70485_71259	9.62536	6.30747	23.2797	0.00160371	0.173402
chr5_143549747_143550676	-0.599653	6.39681	17.7944	0.00161128	0.173402
chr2_180871442_180872197	-0.602833	5.82712	17.7782	0.00161633	0.173402
chr12_89960197_89960903	-0.929471	5.37244	17.7679	0.00161956	0.173402
chr1_219559097_219559804	-0.769772	5.68158	17.7509	0.00162488	0.173402
chr1_48937492_48938356	-0.647301	6.17306	17.7462	0.00162636	0.173402
chr9_140353484_140354075	-7.09331	4.0166	23.1462	0.0016308	0.173402
chr4_49156188_49156997	1.26335	7.97833	17.7278	0.00163217	0.173402
chrUn_gl000225_101300_101907	1.23409	7.225	17.7167	0.00163569	0.173402
chr6_112407968_112409259	-0.583056	5.83798	17.6572	0.00165467	0.173402
chr15_81616328_81617074	-0.562749	5.89992	17.6362	0.00166144	0.173402
chr6_132144283_132144933	-1.04229	5.45979	17.6198	0.00166673	0.173402
chr17_59843598_59845136	0.641937	6.41402	17.5815	0.00167922	0.173402
chr9_gl000199_random_55631_55899	8.63311	5.34943	22.908	0.00168058	0.173402
chr5_154062008_154062827	-0.586538	5.78167	18.8839	0.00168146	0.173402
chrUn_gl000216_142578_142954	9.06863	5.76572	22.8441	0.00169425	0.173402
chr16_46432252_46434590	1.46758	6.80687	17.5325	0.00169533	0.173402
chr6_126660925_126661712	-0.65154	6.00598	17.5157	0.00170088	0.173402
chr3_22636480_22636777	7.08989	4.02798	22.7714	0.00171	0.173402
chrY_13808322_13808792	8.69412	5.4166	22.7641	0.00171159	0.173402
chr5_114505139_114506410	-0.765068	6.51317	17.4696	0.00171629	0.173402
chr3_23986351_23988166	-0.649809	6.13429	17.4689	0.00171652	0.173402
chrY_13448240_13449137	1.22373	7.34238	17.464	0.00171815	0.173402
chr4_156297642_156298587	-0.547178	6.58565	17.4364	0.00172748	0.173402
chrX_106449239_106450058	-0.698169	5.59449	17.429	0.00172998	0.173402
chr14_39900807_39902545	-0.566204	6.42723	17.3997	0.00173994	0.173402
chr2_148777620_148779219	-0.715752	5.84937	17.3665	0.0017513	0.173402
chrUn_gl000224_13678_14099	0.654311	7.52959	17.3542	0.00175554	0.173402
chr7_92156997_92158505	-0.604857	6.39803	17.3352	0.00176211	0.173402
chr4_81256609_81257288	-0.607336	5.77435	17.2912	0.00177742	0.173402
chr1_182602693_182603583	-0.698889	5.96499	17.2855	0.00177943	0.173402
chr3_153514594_153515343	-0.595405	6.52971	17.2615	0.00178787	0.173402
chr4_144105568_144106541	-0.727341	5.26503	17.2583	0.00178901	0.173402
chr9_120162201_120163174	-0.696793	5.80187	17.2396	0.00179561	0.173402
chr8_129355748_129356649	-0.753855	6.57793	17.2369	0.00179654	0.173402
chr7_143533370_143534729	-0.632835	6.8832	17.225	0.00180079	0.173402
chrUn_gl000216_8370_8737	8.69718	5.40983	22.3631	0.00180195	0.173402
chr9_gl000199_random_99273_100122	8.45358	5.19599	22.3475	0.00180558	0.173402
chr1_216356270_216356959	0.835647	5.02206	17.199	0.00181006	0.173402
chr9_gl000199_random_122406_122803	8.32919	5.07228	22.3197	0.00181207	0.173402
chr9_gl000199_random_130821_131326	8.04603	4.83384	22.309	0.00181458	0.173402
chr8_128882531_128883506	-0.939754	5.87957	17.1635	0.00182281	0.173402
chr1_116257169_116257804	-0.64303	6.10074	17.1524	0.0018268	0.173402
chr6_114302217_114302506	-7.06278	3.99598	22.2527	0.00182786	0.173402
chr3_171332439_171332723	-7.08766	4.0119	22.2465	0.00182934	0.173402
chr5_126365293_126366923	-0.705645	6.06983	17.1322	0.00183412	0.173402
chrX_138240397_138240997	-0.891063	5.17433	17.1294	0.00183515	0.173402
chrX_58580919_58581201	8.52015	5.25123	22.2031	0.00183966	0.173402
chr7_100550662_100551218	1.35813	7.82757	17.0971	0.00184694	0.173402
chr4_49655596_49655999	8.87549	5.57255	22.1716	0.00184723	0.173402
chr15_21312882_21314124	1.40831	6.03129	17.0945	0.00184788	0.173402
chrUn_gl000220_104558_107051	1.41196	9.11779	17.0903	0.00184944	0.173402
chr8_107669512_107670982	-0.60615	6.89449	17.0901	0.00184952	0.173402
chr4_128885685_128887210	-0.582609	5.98396	17.0761	0.00185466	0.173402
chrUn_gl000225_56973_57488	8.79132	5.49182	22.1257	0.00185827	0.173402
chr6_131948948_131949667	-0.678238	6.20631	17.0555	0.00186224	0.173402
chr12_64173310_64174251	-0.579079	6.13221	17.0455	0.00186596	0.173402
chr17_73545031_73546216	0.702374	5.45249	17.0423	0.00186714	0.173402
chrX_61682603_61683775	8.03695	4.82756	22.0877	0.00186752	0.173402
chr2_18740867_18742308	-0.652768	5.9867	17.0058	0.00188075	0.173402
chr3_69788133_69788912	-0.743811	5.28741	16.9857	0.0018883	0.173402
chr10_39113717_39114329	8.0221	4.8124	21.9958	0.00189007	0.173402
chr1_249167344_249168850	-0.583966	6.03842	16.9657	0.00189587	0.173402
chrX_61684679_61685475	8.75873	5.46044	21.9612	0.00189866	0.173402
chr10_48331931_48332605	-0.645916	5.5204	16.9546	0.00190004	0.173402
chr3_131100032_131101072	-0.644717	7.03058	16.9528	0.00190071	0.173402
chr9_103399924_103400640	-0.558853	6.04691	16.8807	0.0019283	0.174192
chr1_173836945_173838165	-0.647446	6.69722	16.8539	0.00193868	0.174192
chr6_145298320_145298962	-0.899259	5.10527	16.8313	0.00194749	0.174192
chr6_142467984_142468766	-0.762363	5.61985	16.8281	0.00194874	0.174192
chr14_32953583_32954324	-1.14245	9.56741	16.8175	0.00195288	0.174192
chr1_2586324_2586641	8.39855	5.1327	21.7319	0.00195678	0.174192
chr3_97438089_97438286	-7.04146	3.97819	21.7113	0.00196212	0.174192
chr3_75718065_75718777	1.53312	6.5824	16.7706	0.00197136	0.174192
chr16_46423687_46425222	8.927	5.62259	21.6338	0.00198234	0.174192
chrY_13467841_13468596	1.15964	8.60811	16.717	0.00199272	0.174192
chr1_31904595_31905030	1.50122	6.07047	16.715	0.00199352	0.174192
chrX_102941488_102943066	-0.810249	5.66492	16.7088	0.00199601	0.174192
chr4_49110244_49110715	1.314	8.09766	16.6998	0.00199962	0.174192
chr11_8114166_8114626	-7.05042	3.98796	21.545	0.00200587	0.174192
chr9_gl000199_random_134307_134828	8.03167	4.81988	21.5433	0.00200632	0.174192
chr3_158288597_158289389	-0.603971	6.17058	16.6597	0.00201588	0.174192
chr3_192569607_192570201	-0.727321	5.46471	16.6488	0.00202031	0.174192
chr16_46434928_46435537	1.46792	6.40487	16.6478	0.0020207	0.174192
chr1_242588477_242588829	-7.05453	3.98616	21.4885	0.00202099	0.174192
chr4_176986603_176987473	-0.764741	6.39303	16.6436	0.00202242	0.174192
chr20_55676969_55677675	8.19228	4.96107	21.4718	0.00202549	0.174192
chrX_106871439_106872011	-0.648178	5.66168	16.6341	0.00202629	0.174192
chrY_13482026_13482328	1.19005	7.38013	16.6341	0.00202631	0.174192
chr9_gl000199_random_141346_141628	8.45434	5.18962	21.4493	0.00203158	0.174192
chr17_41399734_41401191	1.31264	6.01196	16.6131	0.00203494	0.174192
chrUn_gl000225_50475_51240	1.16412	8.96344	16.5985	0.00204093	0.174192
chr3_20226898_20228256	-0.65868	6.83074	16.5937	0.00204292	0.174192
chr6_10747460_10748360	-0.654749	5.59657	16.5935	0.00204302	0.174192
chr7_100608853_100609780	0.755545	5.48149	16.5656	0.00205457	0.174768
chrY_13810838_13811217	8.10622	4.88876	21.3271	0.00206507	0.174968
chr12_70379446_70379709	-7.02913	3.96893	21.3219	0.00206651	0.174968
chr17_59391776_59392347	7.88385	4.69629	21.2547	0.00208522	0.17522
chr21_9825554_9827515	1.41466	9.19291	16.4861	0.00208797	0.17522
chr2_166649752_166651324	-0.647406	6.54642	16.482	0.00208975	0.17522
chr20_53221747_53222342	-7.73403	4.56122	21.2364	0.00209036	0.17522
chr5_96270428_96272222	-0.643743	6.05328	16.4632	0.00209772	0.17522
chr2_162138634_162139029	8.11852	4.89198	21.185	0.00210487	0.17522
chr8_109799365_109800223	-0.667035	5.40771	16.4427	0.0021065	0.17522
chr3_164924489_164925191	-0.602659	6.08314	16.4394	0.0021079	0.17522
chr7_11300997_11301714	-0.649297	6.12897	16.4094	0.00212084	0.175895
chr1_181998404_181999463	-0.660788	6.45991	16.3912	0.00212872	0.176148
chr5_168006165_168007069	-0.615595	6.57092	16.3727	0.00213679	0.176187
chrUn_gl000225_125132_125327	1.21321	7.2475	16.3669	0.00213932	0.176187
chr2_210288311_210289264	-0.614031	6.06783	16.3569	0.00214368	0.176187
chr7_80788513_80789183	-0.610392	5.61511	16.3238	0.00215825	0.176844
chrY_13475640_13475830	8.45409	5.19185	20.959	0.00217023	0.176844
chr1_98386063_98387129	-0.61267	6.11183	16.2964	0.00217036	0.176844
chr5_61064619_61064958	-0.973803	5.51849	16.2841	0.00217583	0.176844
chr8_123479064_123479753	-0.756725	5.61568	16.2816	0.00217697	0.176844
chr11_114309974_114310938	-0.646817	5.37034	16.2731	0.00218075	0.176844
chr17_53498827_53499775	-0.549359	6.55965	16.2367	0.00219708	0.177407
chr7_82791346_82792646	-0.683305	7.25461	16.2167	0.00220613	0.177407
chr6_157731499_157732006	1.00466	5.43548	16.2164	0.00220627	0.177407
chr13_108655914_108656653	-0.829871	5.05906	16.2145	0.00220714	0.177407
chr2_190305519_190306703	-0.555142	5.88266	16.1917	0.00221748	0.177847
chr3_170625754_170626746	-0.607326	5.80519	16.17	0.0022274	0.178119
chr2_149266648_149267394	-0.623488	5.81398	16.163	0.00223063	0.178119
chr13_66541167_66541383	-7.0174	3.95736	20.7416	0.00223553	0.17812
chr9_6080111_6080694	-0.633045	5.70299	16.1252	0.00224805	0.178727
chr5_127244841_127245046	-7.01121	3.95261	20.6518	0.00226322	0.179542
chr1_115123560_115124730	-0.543148	7.77333	16.0632	0.00227701	0.179542
chrUn_gl000229_7246_7633	8.08497	4.86363	20.5978	0.0022801	0.179542
chr17_58422605_58423000	-0.770021	6.18206	16.0526	0.002282	0.179542
chr7_62018998_62019432	7.0138	3.96902	20.5791	0.00228596	0.179542
chr2_207023766_207025128	-0.731832	5.6014	16.0403	0.00228781	0.179542
chr12_93835181_93836448	-0.655147	5.52852	16.0247	0.00229522	0.179736
chr7_143598519_143599443	-0.684649	5.90747	16.0005	0.00230677	0.180254
chr2_190007790_190008317	-1.05784	4.95351	15.9507	0.00233071	0.181654
chr2_90481658_90482431	1.36911	6.28447	15.9426	0.00233464	0.181654
chr20_52978560_52979254	7.76167	4.5933	20.3243	0.00236803	0.18386
chr10_101380052_101381429	-0.930897	5.26311	15.8618	0.00237418	0.183946
chr17_57922832_57924511	0.832203	7.51529	15.8421	0.00238397	0.184314
chr6_127914205_127915043	-0.818448	5.07512	15.7989	0.00240556	0.18531
chr20_45886040_45886383	7.75716	4.58844	20.2071	0.00240702	0.18531
chr9_102583576_102584356	-0.716717	6.10832	15.783	0.00241353	0.18542
chr20_52436547_52437221	2.85108	5.43263	15.7018	0.00245497	0.186021
chrUn_gl000228_116460_118840	1.1391	9.50061	15.6982	0.00245679	0.186021
chr8_141108768_141109629	-0.585729	5.66645	15.6921	0.00245996	0.186021
chr4_128553674_128554626	-0.642039	6.17644	15.6912	0.0024604	0.186021
chr15_100273080_100273946	-0.721936	6.05125	15.6887	0.00246171	0.186021
chr8_79442499_79443094	-0.656034	6.07855	15.6826	0.00246484	0.186021
chr3_180630032_180630854	-0.615431	5.86117	15.6801	0.00246615	0.186021
chr2_135249168_135249896	-0.519742	6.09331	15.6761	0.00246824	0.186021
chr17_53828077_53828950	-0.603633	7.08909	15.6606	0.00247625	0.186021
chr4_49139033_49139391	1.20563	7.79726	15.6593	0.00247694	0.186021
chr16_33237360_33237788	3.1489	5.63683	15.6584	0.00247742	0.186021
chr16_76710058_76710708	0.832791	5.90377	15.6131	0.00250114	0.186957
chr2_20251112_20251959	-0.606775	5.77737	15.6112	0.00250212	0.186957
chr10_39123556_39123795	7.75857	4.59101	19.9223	0.00250526	0.186957
chr1_241682209_241683336	-0.636226	6.5981	15.5875	0.00251464	0.187274
chr14_93798560_93799923	-0.521056	6.03373	15.5514	0.00253384	0.188319
chrX_61732727_61733638	7.74309	4.57599	19.8005	0.00254882	0.189048
chr5_13553936_13554316	-6.98247	3.93078	19.781	0.00255591	0.189117
chr2_178483142_178483969	-0.634484	5.93806	15.5004	0.00256128	0.189117
chr4_49101457_49101862	9.43156	6.13291	19.73	0.0025745	0.189117
chrY_58996504_58997320	1.10644	7.05187	15.4668	0.00257956	0.189117
chr4_112258195_112258828	-0.710195	5.12987	15.4658	0.00258012	0.189117
chrX_20008638_20009494	-0.742227	5.24225	15.4601	0.00258325	0.189117
chr1_207752598_207753110	-0.744606	5.63632	15.4523	0.00258753	0.189117
chr6_142393052_142393746	-0.970236	5.16674	15.4426	0.00259283	0.189117
chr10_86189788_86190099	-6.97532	3.92835	19.6607	0.00260004	0.189117
chr20_52480456_52482082	0.954465	7.57161	15.4255	0.00260229	0.189117
chr9_103173666_103174439	-0.547824	6.30897	15.4174	0.00260676	0.189117
chr12_100967033_100968237	-0.568763	6.19981	15.4023	0.00261509	0.189345
chr4_139416118_139416419	-6.97243	3.92537	19.5843	0.00262856	0.189369
chr10_110671476_110672159	-0.66799	5.31481	15.3757	0.00262992	0.189369
chr1_117602066_117603485	-0.509626	5.9085	15.3725	0.00263174	0.189369
chr17_54706958_54707731	-0.557225	6.03519	15.3582	0.00263977	0.189369
chrUn_gl000220_160938_161594	1.14464	8.90532	15.3477	0.00264565	0.189369
chr8_126464207_126464705	-0.943864	5.8169	15.3389	0.00265063	0.189369
chr8_71519723_71521041	-0.681832	5.63481	15.3369	0.00265174	0.189369
chrUn_gl000216_145042_145526	1.19259	8.42098	15.326	0.0026579	0.189437
chr12_114403838_114404612	-0.690677	5.73248	15.2989	0.00267329	0.189974
chr3_4344731_4345790	-0.500329	6.3617	15.2944	0.00267584	0.189974
chr9_gl000198_random_85824_86360	0.629301	5.76648	15.2799	0.00268416	0.190195
chr7_38948146_38948906	-0.597515	6.00846	15.2428	0.00270553	0.191023
chr11_88285652_88286003	-6.96938	3.92213	19.3814	0.00270632	0.191023
chr2_54557283_54558413	-0.770076	5.99814	15.2229	0.00271703	0.19126
chr10_42398358_42399510	1.28861	9.05975	15.2176	0.00272015	0.19126
chr5_147272335_147273137	-0.734705	5.55008	15.2069	0.00272639	0.19133
chr6_146919825_146920524	-0.639922	5.90873	15.1853	0.00273899	0.191432
chr4_122744101_122745511	-0.672746	6.06809	15.1838	0.00273991	0.191432
chr18_44126246_44126512	1.24814	5.8702	15.1775	0.00274358	0.191432
chr12_127650474_127650654	2.06567	5.34714	15.1623	0.00275255	0.191642
chr5_89704812_89706326	-0.567812	5.90386	15.1412	0.00276504	0.191642
chr6_19804686_19805749	-0.634518	5.70761	15.1303	0.00277152	0.191642
chr20_53051669_53052002	8.00501	4.81382	19.2039	0.00277671	0.191642
chr10_17272088_17272949	-0.611221	5.51744	15.1135	0.00278151	0.191642
chr2_89852835_89853593	1.11052	7.82468	15.1075	0.00278511	0.191642
chr8_119633069_119634782	-0.65455	5.59525	15.0948	0.00279272	0.191642
chr3_169939710_169940874	-0.706307	6.17517	15.0913	0.00279484	0.191642
chr6_116937175_116938276	-0.493544	6.20712	15.077	0.00280346	0.191642
chr4_170580958_170581790	-0.798301	5.58014	15.0768	0.0028036	0.191642
chr7_103507302_103507801	6.97434	3.93266	19.1358	0.00280436	0.191642
chr4_126235914_126236535	-0.655711	5.64825	15.0506	0.00281946	0.192177
chr15_100881853_100882611	-0.654491	5.53246	15.0425	0.00282438	0.192177
chr7_134001088_134002180	-0.698036	6.32835	15.0366	0.00282799	0.192177
chr16_33239693_33240015	8.67516	5.39686	19.0377	0.00284475	0.192957
chr16_33865050_33865621	1.22666	6.65368	14.9981	0.00285159	0.193061
chr7_141437360_141438633	-0.578074	5.8927	14.9712	0.00286818	0.193825
chr4_122791042_122791977	-0.533402	6.36744	14.9583	0.00287622	0.194009
chr7_10979270_10980498	-0.638293	5.76099	14.9346	0.002891	0.194646
chr5_94890100_94891183	-0.683175	5.8813	14.9202	0.00290003	0.194895
chrUn_gl000220_117761_119230	1.16367	9.70298	14.9021	0.00291142	0.195301
chr2_154334841_154335748	-0.560485	5.79535	14.8892	0.00291958	0.195488
chr4_190943200_190943929	8.18162	4.94708	18.82	0.00293714	0.195646
chr13_75932120_75932339	-6.94043	3.8964	18.8062	0.00294314	0.195646
chrUn_gl000224_17459_19258	1.37105	7.33172	14.8423	0.00294945	0.195646
chr9_90381519_90382074	-0.663298	5.31796	14.8226	0.00296213	0.195646
chr7_33101824_33103098	-0.648409	7.00306	14.8193	0.00296426	0.195646
chr4_166248097_166249282	-0.61649	7.06815	14.8184	0.00296484	0.195646
chr20_23918047_23918373	6.9542	3.91908	18.7492	0.00296802	0.195646
chr4_119199372_119200372	-0.592618	6.28544	14.8044	0.00297392	0.195646
chr22_17047871_17048239	7.70118	4.54049	18.7274	0.00297761	0.195646
chr6_1641587_1641918	-0.603554	5.86047	14.7973	0.00297849	0.195646
chr16_1075262_1075668	1.16245	6.54667	14.7936	0.00298091	0.195646
chr8_145697758_145698179	-6.93668	3.8943	18.6628	0.00300625	0.196743
chr4_108640797_108642084	-0.566965	6.66978	14.7478	0.00301085	0.196743
chr20_9423303_9424014	-0.651256	6.07797	14.7433	0.00301379	0.196743
chr5_87436626_87437626	-0.57555	6.60763	14.7314	0.00302162	0.196902
chr3_193858832_193859756	-6.93748	3.89331	18.6123	0.00302889	0.197024
chr7_22122262_22123409	-0.544803	5.93185	14.6964	0.00304481	0.197455
chr2_201390565_201391406	-0.747542	5.73995	14.6852	0.00305229	0.197455
chr4_174130585_174131336	-0.896934	5.91264	14.6823	0.00305427	0.197455
chr3_157815522_157816282	-0.61219	5.83502	14.6779	0.00305716	0.197455
chr9_86153079_86154036	-0.565475	5.79377	14.6558	0.00307204	0.197817
chr1_171454083_171455450	-0.556713	6.3594	14.6531	0.00307387	0.197817
chr3_160282831_160284146	-0.697182	5.43785	14.6454	0.00307904	0.197817
chr7_134895779_134896761	-0.611097	6.27211	14.6121	0.00310163	0.198919
chrX_61689822_61690342	8.94045	5.65792	18.3837	0.00313408	0.199056
chr7_25164336_25165558	-0.528075	6.70989	14.5644	0.00313429	0.199056
chr5_112823082_112825313	-0.786637	5.39699	14.5616	0.00313624	0.199056
chrUn_gl000225_85567_86162	0.956986	8.76019	14.5601	0.00313725	0.199056
chr4_178363048_178364128	-0.667132	5.58548	14.5516	0.00314315	0.199056
chr3_142575879_142576319	-0.629282	5.85878	14.5445	0.00314809	0.199056
chr10_90342425_90343373	-0.708371	5.4128	14.5407	0.00315071	0.199056
chr14_51706445_51707427	-0.525889	6.22785	14.5377	0.00315277	0.199056
chr17_63496057_63496474	6.96337	3.93033	18.3362	0.00315654	0.199056
chr9_gl000199_random_91413_92820	1.17408	6.81653	14.5297	0.00315832	0.199056
chr2_178076898_178078095	-0.909029	5.93073	14.5087	0.00317297	0.199635
chr8_127522415_127523073	-0.814803	6.8742	14.4866	0.00318849	0.199718
chr17_58663696_58664377	0.554123	5.99907	14.4824	0.00319145	0.199718
chr11_108535524_108536149	-0.875016	5.05837	14.4707	0.00319972	0.199718
chr13_21951358_21951819	6.97956	3.93962	18.2421	0.00320157	0.199718
chr9_2843399_2844568	-0.63935	5.89666	14.468	0.00320166	0.199718
chr2_9143261_9144433	-0.633768	5.58514	14.4351	0.003225	0.20083
chrX_124780324_124780679	-6.914	3.8755	18.1653	0.00323897	0.201097
chr6_91078762_91079223	-0.665693	6.22984	14.4015	0.00324907	0.201097
chr7_104585361_104586033	-0.68251	6.15379	14.3912	0.00325651	0.201097
chr4_49146011_49147060	1.22775	7.52694	14.3869	0.00325964	0.201097
chr1_147553244_147553756	0.669037	5.33011	14.3843	0.00326149	0.201097
chr14_53257790_53258925	-0.620406	6.09662	14.3831	0.00326234	0.201097
chr2_68694008_68695036	-0.612635	6.38761	14.3607	0.00327862	0.201448
chr12_133706605_133707396	-0.865827	5.29783	14.3583	0.00328035	0.201448
chr7_90032468_90033450	-0.778865	6.38877	14.3525	0.0032846	0.201448
chr11_108337880_108338408	-0.715154	5.2407	14.3432	0.00329139	0.201526
chr9_11064800_11065461	-0.530426	6.27946	14.3343	0.00329791	0.201587
chr10_91460910_91461673	-0.626438	6.14513	14.3244	0.00330513	0.201691
chr11_13689397_13690659	-0.595846	6.40933	14.2375	0.00336976	0.204937
chr3_64751448_64751825	7.54256	4.40724	17.8977	0.00337363	0.204937
chr7_31821981_31822513	-0.51764	6.52088	14.2256	0.00337873	0.204937
chr15_93179948_93180539	-0.777833	5.09409	14.2229	0.0033808	0.204937
chr10_39079038_39079719	1.11782	6.2858	14.206	0.00339356	0.204988
chr7_16684409_16686071	-0.670901	5.9097	14.201	0.00339731	0.204988
chr2_42720891_42721754	6.90984	3.88607	17.8442	0.0034014	0.204988
chr9_gl000199_random_154039_154845	1.08636	6.41372	14.183	0.00341102	0.204988
chr4_166033429_166035086	-0.481961	6.29953	14.1787	0.00341436	0.204988
chr4_49111518_49112095	1.14206	7.74535	14.176	0.00341637	0.204988
chrX_61718678_61719124	8.77199	5.49819	17.8029	0.00342308	0.204988
chr12_78319326_78319754	-0.751844	6.13213	14.1627	0.00342658	0.204988
chr3_169684009_169685258	-0.660906	5.59387	14.1447	0.00344041	0.205364
chr3_120626643_120627568	-0.730834	5.63928	14.1332	0.0034493	0.205364
chr3_39424739_39426143	-0.684813	5.1984	14.1326	0.00344975	0.205364
chr2_211442136_211442875	-0.934505	4.98122	14.1157	0.00346288	0.20581
chr3_189022249_189023081	-0.765832	5.30645	14.102	0.00347352	0.205821
chr4_159289183_159289897	-0.583481	5.89895	14.1001	0.00347502	0.205821
chr12_128410504_128410828	6.91328	3.88819	17.6958	0.00347999	0.205821
chr2_211089422_211090213	-0.765136	5.01663	14.0793	0.00349129	0.206119
chr15_102264016_102264910	-0.548945	6.12026	14.0671	0.00350086	0.206119
chr10_106113043_106113635	-0.599865	5.59779	14.0577	0.00350825	0.206119
chr6_57665982_57666470	6.90513	3.87983	17.6295	0.00351586	0.206119
chr7_158497216_158498250	-0.54164	6.66453	14.0451	0.00351826	0.206119
chr1_218457954_218459025	-0.627356	6.14721	14.0443	0.00351892	0.206119
chr5_53095341_53095979	-0.766987	5.62046	14.03	0.00353027	0.206297
chrX_30670729_30672008	-0.466485	6.06734	14.0189	0.00353905	0.206297
chr4_95069067_95069679	-0.656919	5.89397	14.0115	0.00354501	0.206297
chr20_52909345_52909956	7.53218	4.39818	17.5648	0.00355127	0.206297
chr4_49659121_49659995	1.11102	7.96406	14.0029	0.00355184	0.206297
chr7_12250278_12251474	-0.629691	6.8104	13.9911	0.00356135	0.206297
chr12_69080323_69081283	-0.58738	5.68513	13.9639	0.00358327	0.206297
chr8_70602345_70602612	1.33136	7.10101	13.9533	0.00359187	0.206297
chr10_131265003_131265947	-0.647889	5.37651	13.9516	0.0035932	0.206297
chr8_120994801_120995677	-0.548539	6.12453	13.9488	0.0035955	0.206297
chrY_28798874_28799224	8.74851	5.48197	17.4792	0.00359888	0.206297
chr3_135684111_135685370	-0.551882	6.03808	13.9431	0.00360012	0.206297
chr1_247553188_247553800	-0.646444	5.20829	13.9399	0.00360274	0.206297
chr4_146100861_146102352	-0.581861	5.66714	13.9381	0.00360424	0.206297
chr14_60042955_60043838	-0.501513	6.46975	13.935	0.00360674	0.206297
chr9_112163639_112164159	-0.710656	5.10316	13.9124	0.00362522	0.207029
chr4_115728583_115729409	-0.782556	5.26039	13.8858	0.00364714	0.207371
chr4_49639108_49640111	1.2368	7.30978	13.8848	0.00364797	0.207371
chr1_65885530_65886723	-0.637266	6.42847	13.8844	0.00364826	0.207371
chr16_33973640_33975893	1.21025	6.18514	13.8577	0.00367044	0.207527
chr20_44462324_44462987	6.88918	3.86944	17.3312	0.00368312	0.207527
chr8_127569817_127571122	-0.557746	7.06639	13.835	0.00368942	0.207527
chr6_146284904_146286002	-0.636409	5.69708	13.8329	0.00369115	0.207527
chr2_200775640_200776787	-0.501051	5.98791	13.8315	0.00369239	0.207527
chr14_60557940_60559576	-0.489365	6.63211	13.8216	0.00370072	0.207527
chr2_89878356_89879384	1.14565	7.9373	13.814	0.00370712	0.207527
chr13_76111583_76112510	-0.561215	5.54169	13.8088	0.0037115	0.207527
chr4_120549464_120550507	-0.630071	5.7677	13.8034	0.003716	0.207527
chr12_100660149_100661597	-0.584219	6.2443	13.8024	0.00371691	0.207527
chr3_64869765_64870512	7.48584	4.35988	17.2695	0.00371897	0.207527
chr3_143727392_143727603	-2.98433	5.19063	13.7996	0.00371924	0.207527
chr15_99791112_99791986	-0.681958	5.93375	13.7874	0.0037296	0.207787
chr5_89853872_89854979	-0.69204	7.36355	13.7561	0.00375631	0.20838
chr8_136627183_136627621	6.88976	3.86606	17.2011	0.00375918	0.20838
chr3_64613389_64613854	0.57109	7.07954	13.7491	0.0037623	0.20838
chr7_57555830_57556322	7.51482	4.38404	17.1946	0.00376308	0.20838
chr1_1004062_1004826	-6.8762	3.84644	17.1668	0.00377963	0.208752
chr14_99946752_99948053	-0.615921	6.6368	13.7271	0.00378124	0.208752
chr4_152020305_152021212	-0.639894	5.63037	13.7139	0.00379265	0.208873
chr3_19188023_19188993	-0.53641	6.67368	13.7113	0.00379487	0.208873
chrX_151999038_151999832	-0.585411	6.54785	13.6899	0.00381347	0.209399
chr18_31702604_31702976	-6.87006	3.8404	17.1063	0.00381592	0.209399
chr8_106228550_106229085	0.909009	5.44367	13.6505	0.00384803	0.210844
chr8_129154088_129154739	-0.692705	6.19351	13.6379	0.00385916	0.210976
chr2_176032316_176033469	-0.547751	6.62304	13.6308	0.00386543	0.210976
chr8_120885730_120887093	-0.459059	6.54232	13.6276	0.00386829	0.210976
chr6_80713638_80714686	-0.575036	6.45414	13.6205	0.00387463	0.210976
chr2_157038462_157039171	-0.506119	6.32407	13.6053	0.00388815	0.210976
chr6_8102199_8103106	-0.554403	5.79323	13.5869	0.0039046	0.210976
chr6_160182770_160183872	-0.810353	5.25505	13.5816	0.00390932	0.210976
chr12_38016253_38016553	7.56097	4.42339	16.9489	0.0039125	0.210976
chr1_196643891_196644473	6.88621	3.86607	16.9475	0.00391341	0.210976
chr20_52461474_52462012	2.75063	5.7451	13.5599	0.00392894	0.210976
chrX_58568349_58569583	2.87635	5.84073	13.5592	0.00392957	0.210976
chrX_136647846_136648510	-0.731693	5.45625	13.5573	0.00393122	0.210976
chr1_100715018_100715791	-0.631831	5.58597	13.5543	0.00393397	0.210976
chr3_62016690_62017265	-7.38924	4.26892	16.9146	0.00393397	0.210976
chr6_80816041_80816918	-0.49591	6.50759	13.5502	0.00393772	0.210976
chr3_195163407_195164167	-0.564853	6.02267	13.5353	0.00395117	0.210976
chr12_79693631_79694383	-0.922914	4.95427	13.5319	0.0039543	0.210976
chrUn_gl000216_163214_163768	1.03853	9.0988	13.5317	0.0039545	0.210976
chr19_24601550_24601809	6.90773	3.88398	16.863	0.00396654	0.211023
chr1_197884631_197885735	-0.50996	6.01376	13.5177	0.00396723	0.211023
chr1_211752331_211753071	-0.887599	5.22975	13.5117	0.00397273	0.211023
chr7_27702093_27702844	-0.622304	6.29161	13.5033	0.00398045	0.211126
chr8_91094800_91095347	-0.541781	6.67066	13.4934	0.00398954	0.21124
chr14_60174554_60175020	6.88527	3.86306	16.8197	0.00399418	0.21124
chr12_101387741_101387973	-6.88791	3.8481	16.7955	0.0040097	0.211754
chr4_175749883_175751030	-0.486798	6.17402	13.4407	0.00403836	0.212604
chr1_59762101_59762939	-0.653847	6.17861	13.4383	0.00404061	0.212604
chr3_34148225_34148587	-6.86558	3.8427	16.7436	0.00404327	0.212604
chr11_94963966_94964933	-0.626782	6.45252	13.4231	0.00405493	0.212806
chr2_89852121_89852437	1.11496	6.73011	13.419	0.00405878	0.212806
chr19_10527298_10527675	6.86926	3.85056	16.6901	0.00407826	0.213345
chrX_135991225_135992638	-0.695068	5.32062	13.3881	0.00408789	0.213345
chr5_110062128_110062902	-0.636321	6.23382	13.3732	0.00410205	0.213345
chr7_143317061_143318581	-0.519206	6.93029	13.3653	0.00410953	0.213345
chrX_119763562_119764283	-0.746423	5.52853	13.3556	0.00411881	0.213345
chr2_31712141_31712726	-0.591019	5.44833	13.3539	0.00412045	0.213345
chr2_23574370_23574939	-0.794566	5.73659	13.3528	0.00412153	0.213345
chr4_113557844_113558925	-0.500319	6.36608	13.3483	0.00412578	0.213345
chr14_97263355_97264335	-0.474675	6.8258	13.3481	0.00412605	0.213345
chr11_3675033_3676030	1.61274	5.30866	13.3465	0.00412751	0.213345
chr8_112370389_112370760	-6.84896	3.82288	16.5986	0.00413893	0.213547
chr8_85538381_85538687	-0.583716	5.8795	13.3284	0.00414498	0.213547
chr10_39108587_39109290	1.72927	5.71842	13.3242	0.00414899	0.213547
chr2_64371062_64371920	-0.568932	5.89654	13.3083	0.00416432	0.213813
chr2_212631408_212631844	-0.981918	5.22747	13.3044	0.00416815	0.213813
chr6_8435188_8436341	-0.75548	5.6411	13.3007	0.00417174	0.213813
chr7_86974336_86975399	-0.533862	6.5388	13.2916	0.00418062	0.213968
chr6_117001690_117003135	-0.58088	5.92075	13.2758	0.004196	0.214359
chr9_109655000_109655716	-0.741822	5.47977	13.2666	0.00420501	0.214359
chr7_26903750_26904796	-0.507335	6.16549	13.2624	0.0042091	0.214359
chr8_130832241_130832619	-7.3477	4.23565	16.4854	0.00421566	0.214359
chr5_134260852_134261309	-1.26442	11.166	13.2509	0.00422042	0.214359
chr6_146135196_146136336	-0.581447	5.67555	13.2478	0.0042235	0.214359
chr2_87623737_87624157	1.43536	6.38255	13.2394	0.00423174	0.214479
chr12_68758854_68759419	-0.688723	5.49494	13.1883	0.0042826	0.216464
chr1_2628842_2629330	1.12818	5.99346	13.1881	0.00428277	0.216464
chrX_150151270_150152226	-0.688462	5.94918	13.1676	0.00430344	0.217208
chr7_157940211_157941826	2.17135	5.49134	13.1373	0.0043341	0.218132
chr6_134138580_134138961	-6.85713	3.82541	16.3096	0.00433842	0.218132
chr10_129845656_129845958	-0.549639	5.73352	13.1229	0.00434873	0.218132
chr20_53196000_53196931	7.41481	4.30045	16.2927	0.00435042	0.218132
chr6_10723013_10723598	-0.760002	5.64287	13.1172	0.00435459	0.218132
chr5_118323638_118324835	-0.545768	6.21297	13.1141	0.00435776	0.218132
chr2_199884717_199884972	-7.34974	4.23548	16.2743	0.0043636	0.218132
chr7_92053749_92054319	-0.727559	5.9237	13.0987	0.00437355	0.218222
chr3_9437886_9439596	-0.642165	6.33323	13.0942	0.00437814	0.218222
chr1_244211063_244212233	-0.658272	6.42534	13.0892	0.00438333	0.218222
chr2_209118754_209120460	-0.613514	5.418	13.0678	0.00440538	0.219021
chr3_18486290_18487163	-0.662527	5.58118	13.0612	0.00441224	0.219048
chr2_85838804_85839459	6.84098	3.82708	16.1991	0.00441794	0.219048
chr16_88567494_88567985	2.03396	5.82686	13.0352	0.00443936	0.219811
chr12_78495924_78496432	-2.80935	5.01556	13.0242	0.00445092	0.220085
chr5_147202257_147202737	-6.83087	3.81124	16.1331	0.00446627	0.220302
chrY_13194103_13195552	1.07907	6.08476	13.0028	0.00447336	0.220302
chr14_54863229_54864222	-0.662828	6.45549	12.9973	0.00447917	0.220302
chr20_52307807_52309063	0.631299	7.97976	12.9932	0.00448354	0.220302
chr8_121205641_121206219	-1.08516	4.87989	12.9914	0.00448548	0.220302
chrUn_gl000222_84014_84732	1.54878	6.66043	12.9745	0.00450334	0.220453
chr2_17934453_17936086	-0.626839	5.78747	12.9728	0.00450515	0.220453
chr22_17048530_17049027	7.45242	4.33241	16.0786	0.00450668	0.220453
chr2_14772442_14773298	-0.562706	5.62637	12.963	0.00451566	0.220475
chrX_37853134_37853507	-6.81701	3.79929	16.0532	0.0045257	0.220475
chr2_15067183_15067691	-0.693304	5.69302	12.9446	0.00453531	0.220475
chr5_147763097_147764029	-0.664457	5.90204	12.9363	0.00454431	0.220475
chr21_10780120_10780683	3.40874	6.4061	12.9337	0.00454706	0.220475
chr16_46403410_46404712	1.31298	7.57903	12.9241	0.00455743	0.220475
chr1_232346982_232347272	-6.81318	3.79647	16.007	0.00456055	0.220475
chr1_55229918_55230729	-0.747961	5.18932	12.9187	0.00456326	0.220475
chr20_52271304_52272050	0.557174	6.83493	12.9165	0.00456566	0.220475
chr1_249119749_249121134	-0.576546	5.86049	12.9147	0.00456756	0.220475
chr6_70505974_70507284	-0.513461	6.59318	12.9018	0.00458153	0.220579
chr8_130974977_130975407	-0.904527	5.42359	12.9016	0.0045818	0.220579
chrUn_gl000225_55877_56682	1.24932	7.74521	12.8714	0.00461476	0.221873
chr20_26188824_26189098	2.02705	6.09444	12.8621	0.00462488	0.222067
chr1_236260404_236260709	-0.651787	6.19487	12.8505	0.00463773	0.222391
chr6_101328820_101329667	-0.673139	5.98308	12.8298	0.00466054	0.223013
chr8_9412864_9413942	-0.981767	5.71444	12.8277	0.00466292	0.223013
chr4_49120585_49122246	1.3399	7.60033	12.8079	0.00468497	0.223398
chr13_111567086_111568132	-0.621195	5.75045	12.8047	0.00468854	0.223398
chr3_129830128_129831408	-0.514179	6.87951	12.7998	0.00469392	0.223398
chr5_153417861_153418876	-0.675669	5.80008	12.7985	0.00469544	0.223398
chr5_108804211_108804918	-0.597646	5.44107	12.7825	0.00471336	0.223958
chr9_84304231_84304976	-0.536193	5.77381	12.7672	0.00473056	0.224188
chr6_72129626_72131043	-0.591752	6.2785	12.7521	0.00474771	0.224188
chr8_99370443_99370778	-6.80681	3.78971	15.7659	0.00474799	0.224188
chr7_135661620_135662765	-0.451861	6.62253	12.7437	0.00475721	0.224188
chr13_73301125_73302276	-0.495242	5.76547	13.7314	0.00476354	0.224188
chr17_41465687_41466798	1.04622	6.66353	12.7345	0.00476768	0.224188
chr3_64646682_64647080	7.36969	4.26264	15.7376	0.00477067	0.224188
chrX_99891115_99892083	-0.519047	6.16376	12.7311	0.00477154	0.224188
chr5_89824730_89826106	-0.793885	5.76441	12.7292	0.00477373	0.224188
chr4_49149289_49149628	1.10917	7.91977	12.724	0.00477964	0.224188
chr16_83566532_83567175	0.869828	5.25012	12.7144	0.0047906	0.224324
chr16_33899132_33900771	1.96044	6.57289	12.7064	0.00479989	0.224324
chr1_171750049_171751448	-0.606687	7.17841	12.7054	0.00480097	0.224324
chr11_108463772_108464833	-0.648669	5.27553	12.6967	0.00481097	0.224504
chr2_30369235_30370128	-0.560204	6.30666	12.6838	0.00482585	0.224911
chr17_70142213_70142504	-6.79139	3.78084	15.6394	0.00485029	0.224985
chr9_gl000199_random_124183_125301	1.04975	6.35821	12.6626	0.00485048	0.224985
chrY_13141774_13142062	2.88694	5.40454	12.6603	0.00485315	0.224985
chr14_54976138_54977208	-0.469174	6.39764	12.6598	0.00485368	0.224985
chr19_54637189_54637759	9.07203	5.77978	15.6288	0.004859	0.224985
chr3_190580377_190581010	-0.565275	5.42472	12.6506	0.00486445	0.224985
chr5_147100837_147101593	-0.530317	5.7218	12.6417	0.00487484	0.225054
chr6_11390128_11390597	-6.80286	3.78524	15.6038	0.00487957	0.225054
chr2_240322579_240323467	-0.724985	5.56018	12.6335	0.00488443	0.225054
chr11_27527824_27528878	-0.640522	6.0226	12.6231	0.00489668	0.225334
chr11_97140593_97141009	-6.79575	3.78158	15.5394	0.00493318	0.226727
chr5_108744819_108746519	-0.718529	6.97334	12.5822	0.00494501	0.226985
chrUn_gl000216_75511_76170	1.22041	7.0513	12.5722	0.00495694	0.227247
chr5_134262524_134263074	-1.27241	11.2513	12.5558	0.00497657	0.227834
chr10_2434439_2434854	1.42321	5.10448	12.5509	0.00498248	0.227834
chr8_123584491_123584844	-7.29682	4.192	15.4738	0.00498848	0.227834
chr1_3816639_3818101	-0.814459	4.99212	12.5213	0.0050182	0.228905
chr5_111326941_111327886	-0.528692	5.95513	12.5064	0.00503628	0.229443
chr3_64887004_64887408	7.42843	4.30864	15.4008	0.00505092	0.229625
chr10_38817226_38818641	7.36238	4.25655	15.395	0.00505592	0.229625
chr9_gl000199_random_155641_156592	1.10254	6.51307	12.4876	0.00505915	0.229625
chr12_66523993_66525228	-0.715033	5.30034	12.4771	0.00507206	0.229866
chr3_62095219_62095595	-2.89746	5.12845	12.473	0.00507707	0.229866
chr6_10403873_10404971	-0.57126	5.65283	12.4665	0.00508508	0.229944
chr5_156569246_156570455	-0.531932	6.84604	12.4539	0.00510058	0.230264
chr7_108209723_108211123	-1.01253	6.72821	12.4475	0.00510858	0.230264
chr2_185419265_185420152	0.830516	4.94805	12.4408	0.00511689	0.230264
chr1_77779200_77779655	-0.525172	5.68431	12.4376	0.0051208	0.230264
chr2_88990550_88991666	-0.470843	6.30033	12.4261	0.00513517	0.230264
chr6_131193518_131193842	-6.78549	3.77047	15.2935	0.00514468	0.230264
chrX_119694201_119695604	-0.666615	5.04253	12.4161	0.00514758	0.230264
chr1_207872148_207872562	-0.647948	5.34752	12.416	0.00514771	0.230264
chr9_80204087_80204885	-0.707378	5.55864	12.4094	0.0051559	0.230264
chr2_136684273_136684476	6.80361	3.79596	15.2744	0.00516153	0.230264
chr12_76552398_76552971	-0.612341	5.63238	12.4019	0.00516539	0.230264
chr17_59853572_59854850	0.673206	6.06643	12.3999	0.00516787	0.230264
chrUn_gl000224_11466_12358	1.16365	7.13158	12.3668	0.00520964	0.231842
chr9_132250832_132251165	-6.80045	3.78244	15.2035	0.00522494	0.232239
chr17_80544085_80544419	1.76024	6.02459	12.3271	0.00526023	0.233523
chr7_21050719_21051251	0.825529	5.16103	12.3074	0.00528546	0.234358
chr8_141474304_141475351	-0.531266	6.36694	12.3013	0.00529341	0.234384
chr6_46138221_46139165	-0.726291	5.96392	12.2968	0.00529914	0.234384
chr3_9690830_9691474	-0.514656	5.97606	12.2853	0.00531409	0.234384
chr2_198364059_198365471	-0.628108	6.14785	12.283	0.00531706	0.234384
chr7_94287030_94288007	-0.554001	7.97309	12.2822	0.00531816	0.234384
chr6_58776263_58779731	1.114	9.68996	12.2621	0.00534431	0.235253
chr3_172427952_172429399	-0.624043	6.26326	12.2565	0.0053516	0.23529
chr9_87568915_87569482	-0.74145	5.4312	12.2289	0.00538793	0.236602
chrY_28805568_28805789	7.34992	4.2464	15.0185	0.00539508	0.236631
chr5_107857322_107858031	-0.725356	5.15487	12.2075	0.00541615	0.236741
chrY_28785633_28786073	3.07446	6.2782	12.2071	0.00541672	0.236741
chr6_131254850_131255369	-0.575515	5.86922	12.2069	0.00541704	0.236741
chr1_198668459_198669001	-0.531332	5.93086	12.1951	0.00543275	0.237144
chr7_143105620_143106459	-0.515716	5.97684	12.1822	0.00544987	0.237607
chr2_32390468_32391365	-0.643974	5.31956	12.1716	0.00546406	0.237941
chr7_89975092_89976407	-0.50279	6.30321	12.1648	0.00547321	0.238055
chr3_192444903_192445758	-0.535606	6.16165	12.1244	0.00552793	0.240149
chr2_208030654_208031769	-0.634713	6.1549	12.1183	0.00553621	0.240223
chrY_13866953_13867539	3.54629	5.51639	12.1099	0.00554763	0.240432
chr11_27384369_27385113	-0.663644	5.92425	12.105	0.00555427	0.240435
chr6_155635357_155636308	-0.736629	5.87449	12.0914	0.00557292	0.240928
chr8_104719466_104720419	-0.717015	5.56349	12.0866	0.00557963	0.240928
chr2_89875096_89875685	1.07601	9.07318	12.0823	0.00558548	0.240928
chr2_187636202_187637274	-0.693964	6.38196	12.0153	0.00567867	0.244659
chr9_15552335_15553753	-0.489393	5.63778	12.0022	0.00569711	0.245164
chrUn_gl000225_5984_6979	1.07524	8.15949	11.9945	0.00570794	0.245341
chr8_67579103_67580112	-0.585322	5.8617	11.9237	0.00580912	0.249111
chr9_79186662_79186880	1.91347	5.14703	11.9236	0.00580932	0.249111
chr2_15731658_15732616	-0.561034	5.50399	11.8975	0.00584707	0.250436
chr1_86570616_86571353	-0.539863	5.94949	11.8837	0.00586728	0.251007
chr6_132271475_132272712	-0.64057	5.38816	11.8789	0.00587426	0.251011
chr9_120249710_120250315	-0.476144	6.17786	11.8715	0.00588504	0.251096
chr2_92308444_92308694	3.50544	7.49425	11.86	0.005902	0.251096
chr5_10020_11765	0.765235	6.45869	11.8548	0.00590967	0.251096
chr2_166149974_166150514	-0.880493	6.39259	11.8489	0.00591836	0.251096
chr8_90995958_90997137	-0.480124	6.93175	11.8449	0.00592426	0.251096
chrUn_gl000219_50633_51423	1.77299	6.15927	11.8429	0.00592719	0.251096
chr3_172468129_172469168	-0.498262	6.74991	11.8402	0.00593115	0.251096
chr3_64901389_64902393	2.57937	5.18676	11.8401	0.0059313	0.251096
chr1_186343620_186345283	-0.543897	7.05954	11.8248	0.00595399	0.251359
chr12_97300648_97301924	-0.542522	5.43403	11.9452	0.00595688	0.251359
chr6_144416131_144417355	-0.513173	5.86502	11.8217	0.00595866	0.251359
chr4_49112424_49112903	1.206	7.82554	11.8138	0.00597047	0.251359
chr16_46412836_46413479	1.35648	6.30897	11.8055	0.00598289	0.251359
chr1_142966476_142967704	1.2066	5.20774	11.8039	0.00598528	0.251359
chr1_176175594_176177050	-0.545202	6.71495	11.8013	0.00598907	0.251359
chr2_90075157_90075588	6.7445	3.75323	14.4231	0.0059926	0.251359
chr1_177554369_177555223	-0.505402	6.20222	11.7803	0.0060207	0.252247
chr3_114038349_114038625	6.73714	3.74859	14.3901	0.00602813	0.252269
chr7_111845719_111847373	-0.562139	7.03625	11.7507	0.00606549	0.253064
chr7_116165858_116166769	-0.633371	5.29083	11.7503	0.00606604	0.253064
chr12_102224141_102225049	-0.581176	5.90245	11.7491	0.00606794	0.253064
chr3_156806411_156807459	-0.720155	6.32371	11.7331	0.00609231	0.253791
chr6_126871584_126871960	-0.863393	5.00526	11.7264	0.00610258	0.253928
chr2_16095524_16096152	-0.617403	5.3618	11.7175	0.00611623	0.254207
chr4_49641001_49641490	1.13259	7.41202	11.7074	0.00613172	0.25456
chrX_101853993_101855171	-0.64172	5.33916	11.6976	0.00614688	0.2549
chr2_30978867_30979349	-0.617898	5.7641	11.6738	0.00618377	0.255424
chr17_72450050_72450480	-6.72161	3.72034	14.2405	0.00619263	0.255424
chr8_104426642_104427986	-0.434586	7.03138	11.6672	0.00619396	0.255424
chr7_64954307_64955043	1.10539	6.51407	11.6626	0.00620118	0.255424
chrUn_gl000235_1664_2305	1.2172	5.9743	11.6582	0.00620807	0.255424
chr20_46204973_46205905	0.490528	6.69837	11.6568	0.00621029	0.255424
chr5_17951522_17952479	-0.528701	5.65022	11.6539	0.00621485	0.255424
chr5_145945372_145945859	-2.94299	4.85543	11.6478	0.0062243	0.255424
chr2_62932267_62933431	-0.458604	6.86901	11.6476	0.00622467	0.255424
chr4_82074843_82075615	-0.518545	6.14817	11.6445	0.0062295	0.255424
chr5_96142992_96144273	-0.621661	5.61802	11.6267	0.0062576	0.25559
chrX_103614739_103615337	-0.755686	5.12443	11.6264	0.00625802	0.25559
chr17_57936926_57937725	0.4626	6.53634	11.6254	0.00625954	0.25559
chrY_13677107_13677497	2.85717	5.00017	11.6241	0.00626159	0.25559
chr1_142535733_142536949	2.425	6.49839	11.6144	0.00627705	0.255935
chr13_114879123_114879432	6.7586	3.76413	14.1581	0.00628566	0.256
chrX_106045458_106046478	-0.737163	5.7771	11.5996	0.00630042	0.256131
chr1_114354009_114355515	-0.504466	8.25831	11.5948	0.00630817	0.256131
chr2_84743204_84743988	-0.547344	6.28065	11.5863	0.0063217	0.256131
chr2_19340448_19341153	-0.737239	5.79056	11.5852	0.00632344	0.256131
chr2_24298851_24300423	-0.499434	6.44201	11.5849	0.00632395	0.256131
chr12_107528464_107528690	-6.70203	3.7092	14.1132	0.00633714	0.25638
chr20_9304276_9304556	-7.18677	4.10063	14.0873	0.00636706	0.256836
chr16_31499040_31499547	0.899255	4.87475	11.5559	0.00637049	0.256836
chr2_206544531_206545073	-0.720778	5.59256	11.5546	0.00637251	0.256836
chr14_36402172_36402614	-6.70575	3.71396	14.0717	0.00638514	0.256836
chr6_147961793_147962224	-6.69848	3.70472	14.0694	0.00638779	0.256836
chr3_190039990_190040688	-0.969905	4.88238	11.5434	0.00639063	0.256836
chr2_192194571_192194962	-1.07448	4.73757	11.5266	0.00641789	0.257648
chr16_508405_508607	7.28865	4.19301	14.0336	0.00642969	0.257819
chr9_86535675_86536717	-0.493139	6.03554	11.5153	0.0064363	0.257819
chr10_16478441_16479318	-0.450717	6.22885	11.5019	0.00645829	0.258177
chr2_153782136_153782806	-0.77104	5.36308	11.4972	0.00646603	0.258177
chr4_139831736_139832688	-0.670185	5.64898	11.4936	0.00647195	0.258177
chr4_49151171_49152038	1.10763	8.80536	11.4926	0.00647354	0.258177
chr5_101631524_101632574	-0.55502	6.46311	11.4559	0.0065341	0.259831
chr1_170043377_170044123	-0.508277	7.52109	11.4513	0.00654186	0.259831
chr13_98085159_98086250	-0.628608	5.49257	11.4494	0.00654493	0.259831
chr6_147402211_147402677	-0.729374	5.49694	11.4467	0.00654951	0.259831
chr19_gl000208_random_89652_92572	1.1552	5.4064	11.4457	0.00655124	0.259831
chr14_81407563_81408593	-0.55044	6.66757	11.4386	0.006563	0.259831
chr18_57069640_57070180	-0.679248	5.4478	11.4305	0.0065766	0.259831
chr2_209848052_209848794	-0.806024	5.25939	11.4266	0.00658315	0.259831
chr1_109817268_109818002	0.722204	5.23599	11.4254	0.00658514	0.259831
chr15_50295800_50296358	-0.489624	6.63442	11.4225	0.00658996	0.259831
chr22_22011795_22012273	6.71478	3.72987	13.8907	0.0066001	0.259831
chr12_88428885_88430004	-0.626266	5.86991	11.4163	0.00660044	0.259831
chrX_11257402_11257757	-0.657733	5.61632	11.4073	0.0066156	0.260147
chr10_39093866_39094454	1.16231	6.36045	11.4014	0.00662558	0.260259
chr3_63047159_63047453	7.28792	4.18895	13.8603	0.00663712	0.260432
chr7_34214498_34215223	-0.448254	7.53708	11.377	0.00666689	0.261319
chr1_216773962_216774907	-0.506356	6.51625	11.3601	0.00669583	0.262172
chr10_130010235_130010651	-0.666157	5.57754	11.3448	0.00672205	0.262454
chr20_53320610_53321090	7.21022	4.13158	13.7897	0.00672412	0.262454
chr8_94294401_94294776	6.68826	3.71114	13.7867	0.0067279	0.262454
chr2_68067584_68067895	-7.14706	4.07353	13.7785	0.00673806	0.262454
chr1_76080326_76081077	-0.543727	5.57276	11.3349	0.00673901	0.262454
chr11_19733923_19734696	-0.551901	5.80383	11.3291	0.00674902	0.262564
chrX_107334266_107335693	-0.526098	6.36108	11.323	0.00675958	0.262695
chr7_14020728_14021095	0.562927	5.34164	11.3297	0.00676988	0.262815
chr21_10826986_10827197	7.21784	4.13841	13.7226	0.00680811	0.263778
chr2_8821952_8822450	-0.525236	5.87817	11.2945	0.00680913	0.263778
chr2_169193165_169193775	-0.566604	6.20921	11.2891	0.00681861	0.263865
chr8_127592027_127592755	0.575466	5.2885	11.8631	0.00684488	0.264601
chr4_142774395_142775031	-0.758473	5.20314	11.2681	0.00685549	0.264731
chr19_gl000208_random_49_560	0.916148	5.54062	11.2559	0.00687699	0.265195
chr4_148538136_148539289	-0.647025	6.40141	11.2531	0.00688204	0.265195
chr2_212022676_212023026	-7.14183	4.06424	13.6258	0.00693173	0.266828
chr8_130443866_130444724	-0.535725	6.0155	11.2207	0.00693955	0.266847
chr4_49293431_49294542	1.01594	5.86658	11.2095	0.00695959	0.267188
chr4_155470969_155471892	-0.526183	6.19437	11.2076	0.00696304	0.267188
chr1_188738672_188739670	-0.717715	5.03485	11.2006	0.00697566	0.267244
chr3_112280084_112281483	-0.524413	6.79542	11.1986	0.00697915	0.267244
chr12_107711553_107712786	-0.646827	5.33823	11.1943	0.00698686	0.267259
chr6_170707564_170709359	1.08833	5.13354	11.1864	0.00700123	0.267264
chr13_72795366_72795885	-0.620203	5.40452	11.1861	0.00700164	0.267264
chr12_45090269_45090782	6.6786	3.70288	13.5552	0.00702365	0.267755
chr3_152878323_152880389	-0.768216	6.57088	11.1709	0.00702918	0.267755
chr1_114447049_114448406	-0.517904	8.43912	11.1631	0.0070434	0.268017
chr1_8021298_8021991	-0.809264	5.07582	11.1258	0.00711159	0.269797
chr9_140739553_140740822	1.29766	5.3607	11.1258	0.00711166	0.269797
chr7_92392947_92393395	-0.742232	5.41553	11.1254	0.00711239	0.269797
chr1_198906111_198906754	-0.505719	6.47228	11.1201	0.00712203	0.269883
chr3_19988032_19989530	-0.647898	6.90438	11.1129	0.00713546	0.270111
chr3_185303604_185304451	-0.59137	5.44778	11.1057	0.00714868	0.270331
chr20_23779965_23780381	-0.642725	5.35833	11.1011	0.0071573	0.270377
chr1_115258797_115259822	-0.494795	7.04982	11.0803	0.00719602	0.271559
chr6_126277730_126278418	-0.488876	5.68482	11.0687	0.00721762	0.271802
chr17_58558121_58558646	1.99069	5.11957	11.0672	0.00722038	0.271802
chr3_167452151_167453805	-0.486229	7.41397	11.0649	0.00722482	0.271802
chr16_78036896_78037226	-0.772456	5.21394	11.0494	0.00725395	0.272479
chr20_47296070_47296479	-7.11268	4.04245	13.3797	0.00725887	0.272479
chr2_2617122_2617739	-0.50636	6.27006	11.04	0.00727157	0.272479
chr2_181579701_181580437	-0.695346	5.0272	11.0394	0.00727268	0.272479
chr6_169240568_169240810	7.22693	4.1437	13.3537	0.00729459	0.27302
chr16_77939224_77939790	0.602271	5.19134	12.8677	0.00731707	0.273581
chr2_8943933_8944647	-0.654742	6.05976	11.0009	0.00734601	0.274381
chr1_87916468_87916861	-0.753058	5.44122	10.9891	0.00736854	0.274942
chr6_144881237_144881652	-6.63497	3.65628	13.2829	0.00739303	0.275573
chr14_49261542_49262630	6.66475	3.69545	13.2767	0.00740167	0.275613
chr12_114679731_114680152	-6.63427	3.65594	13.2673	0.00741494	0.275613
chr11_122852472_122852915	-6.62539	3.65445	13.2602	0.00742488	0.275613
chrX_109560608_109561965	-0.630824	5.13573	10.9561	0.00743215	0.275613
chr5_150632076_150632937	-0.532418	6.18041	10.9533	0.00743768	0.275613
chr3_160116656_160118331	-0.884216	5.24021	10.9524	0.00743941	0.275613
chr12_104323461_104324379	-0.475532	6.28976	10.9396	0.00746425	0.27576
chr9_21110897_21111219	-6.6309	3.65242	13.2313	0.00746577	0.27576
chr3_96336085_96336982	-1.1878	11.2809	10.9387	0.00746606	0.27576
chrX_61719315_61719888	2.51642	6.66624	10.9306	0.00748188	0.276065
chr1_177139843_177140437	-0.528013	6.86705	10.9262	0.0074905	0.276104
chr1_246329456_246330072	-0.569332	5.4527	10.9175	0.00750757	0.276216
chrX_58561248_58561614	1.03204	6.89295	10.9169	0.00750866	0.276216
chr2_211367667_211368197	-0.753591	5.14465	10.9031	0.00753581	0.276877
chr14_27374410_27374852	6.63619	3.67102	13.1781	0.00754181	0.276877
chr6_155054074_155055642	-0.518321	5.88476	10.8769	0.0075878	0.278215
chr3_146261833_146262791	-0.533421	6.19335	10.874	0.00759349	0.278215
chr1_150540717_150541003	-6.62152	3.64885	13.1368	0.00760139	0.278225
chr2_39102683_39103399	-0.566931	5.67178	10.8605	0.00762048	0.278644
chr6_8063999_8064897	-0.588666	5.37203	10.8475	0.00764655	0.279317
chr1_182038167_182038550	-0.677134	5.16643	10.8326	0.00767643	0.279757
chr10_42356051_42357113	2.08453	7.39424	10.8313	0.0076791	0.279757
chr10_106065076_106065875	-0.706617	4.93747	10.8263	0.00768923	0.279757
chr7_105924836_105926160	-0.510638	6.84374	10.8254	0.00769104	0.279757
chr4_171010703_171011602	-0.720445	5.4786	10.8225	0.00769692	0.279757
chrX_37208151_37209023	-0.704199	5.04801	10.8142	0.00771381	0.280063
chr1_29609664_29610173	-6.60585	3.63553	13.0476	0.00773243	0.280063
chr3_33839699_33840723	-0.798597	4.94835	10.8036	0.00773533	0.280063
chr7_39781919_39782146	-7.10369	4.03685	13.0402	0.00774333	0.280063
chr7_56438928_56440053	1.33732	6.29921	10.7994	0.00774372	0.280063
chr9_79073891_79074455	-0.511551	5.4724	11.9457	0.00775595	0.280228
chr2_19547374_19548189	-0.634141	5.46862	10.7886	0.00776578	0.280305
chr16_21531197_21531945	0.690392	5.12144	10.7767	0.00779014	0.280671
chr14_81999742_82000561	-0.510089	7.03716	10.7762	0.00779129	0.280671
chr20_53509005_53509678	0.66007	6.14539	10.7703	0.00780342	0.280831
chr12_70759411_70761093	0.575637	5.1924	10.9437	0.00781526	0.28098
chr2_158732299_158733493	-0.584308	5.68546	10.7451	0.00785533	0.282065
chr14_105948308_105948672	-7.09538	4.02594	12.9581	0.00786665	0.282065
chr7_101499918_101500556	-0.582569	5.74935	10.7372	0.00787178	0.282065
chr9_127905532_127906189	-0.447419	5.9906	10.8424	0.00787637	0.282065
chr1_163291183_163292204	-0.48238	6.01922	10.7237	0.00789996	0.282403
chr4_49324844_49325569	1.67053	5.48815	10.7231	0.00790127	0.282403
chr12_76630208_76630904	6.61915	3.65724	12.9262	0.00791528	0.282627
chr20_57227160_57227812	7.19756	4.11581	12.9171	0.0079291	0.282843
chr11_118192217_118192746	6.63069	3.66747	12.902	0.00795236	0.283396
chr6_120048312_120049725	-0.496689	5.6912	10.6924	0.00796551	0.283588
chrUn_gl000225_34547_34946	1.73647	6.55194	10.684	0.00798331	0.283944
chr5_7816247_7816827	-0.506968	6.05685	10.6703	0.00801234	0.284589
chr2_209130606_209131563	-0.521532	5.84529	10.6681	0.00801703	0.284589
chr4_113152441_113153734	-0.549609	5.91884	10.6598	0.00803475	0.284941
chr2_141343702_141344325	-0.584211	5.80329	10.6556	0.00804352	0.284975
chr1_247094349_247095694	-0.49189	5.48584	10.7463	0.00807684	0.285527
chr6_124511425_124511872	6.60712	3.64735	12.821	0.00807812	0.285527
chr7_134117122_134117905	-0.757264	5.64748	10.6374	0.00808257	0.285527
chr5_175874522_175876012	-0.74762	5.36421	10.6275	0.00810384	0.285701
chr8_133058821_133059484	-0.597813	5.92723	10.6252	0.00810868	0.285701
chr2_29117210_29118117	-0.68264	5.13628	10.6242	0.00811099	0.285701
chr9_15306104_15307696	-0.549535	5.53994	10.6196	0.00812095	0.285735
chr5_134263332_134263706	-1.15588	11.1794	10.6165	0.0081276	0.285735
chr2_198380327_198381384	-0.621625	6.17068	10.6107	0.00813998	0.285894
chr12_102513457_102514465	-0.635851	5.99886	10.5923	0.00818	0.286783
chrX_149107824_149108978	-0.598237	6.00117	10.5885	0.00818827	0.286783
chr1_121478616_121479346	3.20436	6.45275	10.5882	0.00818887	0.286783
chr3_15642579_15643795	-0.485814	6.60202	10.5732	0.00822167	0.286916
chr1_222790894_222791246	-0.578439	5.28722	11.0991	0.00822506	0.286916
chr3_23145285_23145595	-6.58486	3.62166	12.7219	0.00823554	0.286916
chr17_22020691_22020960	-1.03034	10.5155	10.5661	0.00823721	0.286916
chr6_116574744_116575592	-0.503363	5.57934	10.561	0.0082485	0.286916
chr3_64620643_64621464	2.5432	4.98438	10.5562	0.00825893	0.286916
chr2_187350394_187351435	-0.529043	5.98462	10.5556	0.00826031	0.286916
chr14_39391203_39391653	-6.59777	3.62847	12.7057	0.00826166	0.286916
chr18_18516915_18517735	1.18046	8.10244	10.5508	0.00827084	0.286916
chr7_135193814_135195412	-0.600649	5.82653	10.5506	0.00827127	0.286916
chr5_14011244_14012079	-0.545438	6.02017	10.534	0.00830799	0.287915
chr12_95396993_95397701	-0.574293	5.2299	10.5184	0.00834271	0.288237
chr1_165666975_165668157	-0.468622	5.79349	10.5161	0.00834793	0.288237
chr17_54402844_54403393	6.59682	3.63842	12.6427	0.00836424	0.288237
chr1_249200148_249201252	-0.451107	6.19565	10.5074	0.00836727	0.288237
chr15_74265356_74265699	6.6033	3.65054	12.6401	0.00836841	0.288237
chr6_147226490_147227011	-0.609955	5.57013	10.505	0.00837263	0.288237
chr1_192777456_192778361	-0.461346	6.36839	10.5008	0.00838217	0.288237
chr4_49300407_49300695	2.81297	5.03285	10.5	0.00838394	0.288237
chr10_92980002_92981023	-0.559107	5.65006	10.498	0.00838834	0.288237
chr7_101525961_101526705	-0.568194	5.26256	10.4906	0.00840499	0.288537
chr4_171295995_171296258	-0.931142	5.19624	10.4843	0.00841917	0.288752
chr11_11988489_11988673	-7.04342	3.98978	12.5968	0.00843991	0.288959
chr11_82867379_82868415	-0.528528	7.13158	10.4746	0.00844104	0.288959
chr3_155571356_155572972	-0.517379	6.69399	10.4608	0.00847225	0.289453
chr3_120460977_120461989	-0.486455	6.13803	10.4598	0.00847449	0.289453
chr7_gl000195_random_86264_87126	-0.490782	5.84512	10.4577	0.00847926	0.289453
chr6_153824900_153825338	-6.55988	3.59933	12.5574	0.00850567	0.290083
chr2_92324057_92326141	1.07261	8.39107	10.4257	0.00855233	0.291402
chrY_13669480_13670024	7.08773	4.03227	12.5095	0.00858625	0.292285
chr7_112579370_112580654	-0.605424	7.58052	10.3918	0.00863069	0.293101
chr8_110345823_110347041	-0.522056	8.04382	10.3911	0.0086324	0.293101
chr7_108165899_108167156	-0.555884	7.03116	10.3839	0.00864912	0.293101
chr8_73920633_73921538	-0.429396	6.67738	10.3831	0.0086509	0.293101
chr1_107221264_107221826	2.42385	5.36122	10.3761	0.00866725	0.293101
chrY_13474312_13474724	1.66466	6.37583	10.3761	0.00866729	0.293101
chr3_63391512_63391807	7.09454	4.037	12.4601	0.00867057	0.293101
chr8_117208137_117208486	-6.54999	3.59579	12.4579	0.00867449	0.293101
chr20_29591450_29591809	0.434042	5.89234	10.368	0.00868603	0.29322
chr19_37341002_37342128	6.56886	3.61897	12.4332	0.00871703	0.293994
chr3_64330278_64331043	0.500532	6.5031	10.3428	0.00874531	0.294676
chr3_189034092_189034632	-0.606982	5.29771	10.3315	0.00877192	0.2953
chr2_181844841_181845763	-0.591162	5.57271	10.3195	0.0088005	0.295595
chr5_34929212_34930387	-0.610982	5.65771	10.3183	0.00880324	0.295595
chr15_102307183_102307673	-7.02502	3.97286	12.3826	0.00880499	0.295595
chr15_35837630_35838682	-0.577556	5.35873	10.3004	0.00884607	0.296701
chr7_61982719_61983002	3.33402	5.16092	10.2892	0.0088727	0.297321
chr2_197790460_197792027	-0.552299	5.53984	10.2796	0.00889591	0.297825
chr3_11313578_11314344	-0.543192	5.51431	10.2698	0.0089194	0.298338
chr10_111970589_111971407	-0.507161	5.45018	10.2556	0.00895388	0.298763
chr12_109124865_109126176	-0.496104	5.85105	10.2518	0.00896297	0.298763
chr4_12641943_12642247	-7.08146	4.0102	12.2927	0.00896428	0.298763
chr1_67390234_67391411	-0.428189	6.55247	10.2479	0.00897243	0.298763
chr8_129026925_129027198	-7.05009	3.99561	12.2837	0.00898042	0.298763
chr21_10807060_10807376	1.7602	6.53814	10.2443	0.00898124	0.298763
chr6_128293105_128293675	-0.837462	5.38014	10.2329	0.00900904	0.299228
chr13_76123303_76124623	-0.586092	5.72321	10.2319	0.00901161	0.299228
chrY_13137810_13138442	2.50617	5.55737	10.2168	0.00904847	0.300031
chrUn_gl000214_136453_137565	2.70013	5.5203	10.2153	0.00905223	0.300031
chr13_54603450_54603812	6.56804	3.61746	12.2391	0.00906092	0.300046
chr7_110174372_110175379	0.564406	5.3499	10.2022	0.00908446	0.300465
chr12_102455012_102456124	-0.651165	5.51071	10.2	0.00909004	0.300465
chr14_99740753_99741312	-0.5139	6.03048	10.1906	0.00911317	0.300957
chr3_193852181_193853005	-0.52765	5.4176	10.1865	0.00912332	0.300965
chr7_138144425_138145826	-0.525958	6.14221	10.1702	0.00916381	0.300965
chrUn_gl000226_5005_7700	1.05852	8.64686	10.1697	0.0091651	0.300965
chr4_191043613_191044241	0.629099	5.50815	10.1565	0.00919815	0.300965
chrX_49686975_49687935	-0.563765	5.55807	10.1546	0.00920297	0.300965
chr2_139674717_139674908	-7.02827	3.97777	12.1531	0.00921884	0.300965
chr1_246771841_246772642	-0.585725	5.80837	10.1475	0.00922064	0.300965
chr8_43096430_43097051	0.944683	9.20264	10.1472	0.00922141	0.300965
chr16_33293771_33294496	1.18496	6.13837	10.1467	0.00922277	0.300965
chr1_145058765_145059421	2.04816	5.25566	10.1462	0.00922402	0.300965
chr20_45962744_45963192	2.43145	5.47977	10.1459	0.00922467	0.300965
chr2_59083160_59083807	6.55502	3.60612	12.1491	0.00922634	0.300965
chr6_127836729_127838109	-0.523316	5.57896	10.1445	0.00922839	0.300965
chr9_68454704_68455783	0.559108	5.48861	10.1443	0.00922887	0.300965
chr3_193310715_193311620	-0.66573	5.76911	10.1402	0.00923901	0.300967
chr3_132035952_132036764	-0.534938	5.46835	10.1377	0.00924543	0.300967
chr7_30323736_30324682	-0.571117	6.21246	10.1289	0.00926763	0.301421
chr11_102139079_102139713	-0.638745	5.44267	10.089	0.00936914	0.304451
chr11_94698187_94698382	-6.51501	3.5698	12.0612	0.00939155	0.304908
chr2_65267699_65268061	-6.50736	3.56084	12.0524	0.00940828	0.305179
chrUn_gl000243_17371_17638	0.713662	5.74613	10.0605	0.00944258	0.305835
chr2_18011752_18012379	-0.610014	6.42103	10.0583	0.00944831	0.305835
chr1_247373523_247374365	-0.544959	5.75812	10.0537	0.00946003	0.305835
chr13_64324098_64324400	-6.99393	3.94655	12.0243	0.00946203	0.305835
chr19_45273888_45274148	6.55143	3.60665	12.0149	0.00948002	0.305893
chr5_122847132_122848435	-0.647841	5.79748	10.0458	0.00948056	0.305893
chrX_48659774_48660957	-0.506921	5.56638	10.0228	0.0095407	0.307292
chr14_62161675_62163036	-0.536955	6.56558	10.0227	0.00954078	0.307292
chr8_43793180_43794332	1.0415	7.33005	9.99984	0.00960093	0.308619
chr1_236958073_236959332	-0.455968	6.49106	9.98929	0.0096288	0.308619
chr9_68412864_68414116	0.46923	7.41287	9.98586	0.00963788	0.308619
chr16_72042151_72043031	-0.455656	6.49327	9.98562	0.00963853	0.308619
chr13_105293659_105294214	-6.49809	3.55401	11.9319	0.00964153	0.308619
chr6_118116432_118116840	6.51728	3.58198	11.9284	0.0096484	0.308619
chr1_236444799_236445836	-0.562362	5.64381	9.9765	0.00966272	0.308619
chr2_109252793_109253273	-0.652992	5.44455	9.97038	0.00967902	0.308619
chr20_40834664_40835572	-0.515336	6.30731	9.96785	0.00968574	0.308619
chr7_28725048_28725804	-0.624946	5.61887	9.96461	0.00969438	0.308619
chr1_144593347_144594298	0.57596	5.36696	9.9627	0.0096995	0.308619
chr3_136470852_136472013	-0.489796	6.40183	9.96252	0.00969997	0.308619
chr2_187247309_187248213	6.52063	3.58578	11.8973	0.00970974	0.308619
chr7_95063836_95064653	-0.476755	6.40963	9.95218	0.00972763	0.308619
chr3_63032696_63033143	7.03271	3.9871	11.8877	0.00972891	0.308619
chr5_110847762_110848852	-0.515943	6.37557	9.94924	0.0097355	0.308619
chr8_82802794_82803303	-0.745377	5.40599	9.94647	0.00974294	0.308619
chr7_84544001_84544178	-6.97785	3.93448	11.875	0.00975424	0.308619
chr3_38178299_38179082	-0.521375	6.11104	9.93891	0.00976327	0.308619
chr2_176401449_176401968	-6.50061	3.56413	11.8693	0.00976547	0.308619
chr2_159041214_159041830	-0.807374	5.22798	9.93769	0.00976655	0.308619
chr5_176884648_176884901	-6.99827	3.94696	11.868	0.00976803	0.308619
chrY_13196104_13196456	3.05717	4.64549	9.92841	0.00979157	0.309095
chr11_126138364_126139287	-0.700943	5.37821	9.91802	0.00981969	0.309634
chr11_130785838_130786631	-0.626999	5.33236	9.91058	0.00983987	0.309634
chr1_214834213_214834526	-6.97144	3.93117	11.8322	0.00984012	0.309634
chr1_210925193_210925611	6.52772	3.58526	11.8307	0.00984299	0.309634
chr3_113414871_113416138	-0.432924	6.74983	9.9024	0.00986212	0.309634
chr15_62042570_62043167	-0.612224	5.10983	10.1939	0.00988372	0.309634
chr2_132996259_132997127	2.37261	6.45454	9.89155	0.00989174	0.309634
chr1_217262731_217263545	-0.508424	6.66896	9.88768	0.00990232	0.309634
chr12_120105320_120106285	-0.463353	6.26259	9.88341	0.00991401	0.309634
chr7_155090661_155090897	-7.04716	3.97867	11.794	0.00991752	0.309634
chrUn_gl000224_217_1775	0.514921	7.55371	9.8819	0.00991815	0.309634
chr1_198025257_198026000	-0.617576	5.39443	9.88127	0.00991988	0.309634
chr4_49093605_49094202	1.64071	6.24651	9.87821	0.00992828	0.309634
chr8_126081730_126082745	-0.550281	5.42551	9.8766	0.00993271	0.309634
chr4_37649715_37650259	-0.815509	5.05553	9.87544	0.00993591	0.309634
chr3_167631070_167631271	-6.96506	3.92528	11.7753	0.0099557	0.309813
chr3_117591898_117592429	6.50836	3.57393	11.7693	0.00996802	0.309813
chr3_38206270_38207495	-0.597973	5.75613	9.86205	0.00997279	0.309813
chr7_32719925_32720854	-0.597781	5.57958	9.85749	0.00998539	0.309813
chr4_28787_29435	0.596972	5.242	9.85663	0.00998776	0.309813
chr4_123653350_123654403	-0.579345	6.85945	9.85488	0.0099926	0.309813
chr2_197503977_197504862	-0.54777	6.56678	9.84852	0.0100102	0.310096
chr1_181473374_181473727	-6.96548	3.92352	11.7386	0.0100312	0.310372
chr12_92539381_92540252	-0.546199	6.11123	9.83918	0.0100362	0.310372
chr6_147235907_147236485	6.49929	3.56555	11.7288	0.0100514	0.310488
chr2_88926584_88927866	-0.435176	6.29985	9.83173	0.0100569	0.310488
chr4_147096663_147097701	-0.587227	5.37053	9.82077	0.0100875	0.310848
chr5_87564285_87565562	-0.531895	6.15516	9.81691	0.0100983	0.310848
chr11_88217918_88218399	-0.908861	4.78158	9.81597	0.010101	0.310848
chr16_3355234_3355789	6.51208	3.58102	11.7042	0.0101027	0.310848
chr20_52961556_52962537	0.403249	6.80985	9.80169	0.0101411	0.311654
chr7_87849075_87850013	-0.598174	6.52105	9.79999	0.0101459	0.311654
chr8_124428406_124429536	-0.530298	6.33188	9.7931	0.0101653	0.311988
chr11_6704229_6704971	-0.533386	5.69195	9.7758	0.0102144	0.313158
chr2_88337828_88338193	6.49274	3.56086	11.6481	0.0102206	0.313158
chrX_61847479_61847736	7.01917	3.97485	11.6331	0.0102524	0.313557
chr1_48559441_48560006	-0.662687	5.15774	9.76097	0.0102566	0.313557
chr3_76094238_76094587	6.48613	3.55882	11.6298	0.0102594	0.313557
chrX_138027299_138027896	-0.801591	5.00944	9.75459	0.0102748	0.313765
chr8_112943331_112944049	-0.693225	5.88841	9.74986	0.0102884	0.313916
chr5_94043063_94043396	6.48571	3.55667	11.5957	0.0103322	0.314756
chr5_170814113_170815650	-0.983619	5.3182	9.73264	0.0103379	0.314756
chr14_78082742_78083515	-0.531117	6.65793	9.73129	0.0103418	0.314756
chr4_177240565_177241863	-1.03944	5.14759	9.72442	0.0103616	0.315097
chr3_69249493_69250144	-0.848493	5.04876	9.71189	0.0103979	0.315938
chr10_158126_158506	6.48675	3.55734	11.5518	0.0104271	0.316511
chr12_77157366_77158702	-0.513275	6.60435	9.69943	0.0104342	0.316511
chr11_30344374_30345087	-0.507588	5.7724	9.6878	0.0104681	0.316873
chr22_21239913_21240315	6.48717	3.55534	11.5323	0.0104697	0.316873
chr3_66550833_66552085	-0.538597	5.83049	9.68644	0.0104721	0.316873
chr9_112402155_112403228	-0.48914	5.53043	11.1615	0.0105019	0.317344
chr21_40467140_40467590	-6.43864	3.51177	11.5086	0.0105214	0.317344
chr2_165370923_165371710	-0.560159	5.93041	9.6696	0.0105216	0.317344
chr5_147391081_147391680	-0.559367	5.2659	9.66447	0.0105367	0.317344
chr3_139238986_139239287	-6.44926	3.51419	11.5005	0.0105392	0.317344
chr7_19748141_19749137	-0.452966	6.16456	9.66338	0.0105399	0.317344
chr3_156391666_156392813	-0.517337	6.5179	9.64924	0.0105817	0.318164
chr16_46388043_46388777	3.44917	6.29295	9.64786	0.0105858	0.318164
chr7_142490817_142491520	-0.57262	5.2908	12.339	0.0105984	0.318164
chr10_97320603_97321412	-0.571744	5.6277	9.64241	0.010602	0.318164
chr8_126010072_126011230	-0.496582	6.8974	9.63471	0.0106249	0.318549
chr4_42867690_42868131	-6.44504	3.5094	11.4555	0.0106391	0.318549
chr10_129948304_129948777	-0.756461	5.0656	9.62722	0.0106472	0.318549
chr7_90268867_90269769	-0.508463	5.80329	9.62162	0.010664	0.318549
chr12_83390104_83390479	-6.45454	3.51541	11.4377	0.0106788	0.318549
chr12_107380503_107381106	-0.482264	5.56794	10.6064	0.010683	0.318549
chr4_190155579_190155838	6.98632	3.95016	11.4268	0.0107032	0.318549
chr1_247170898_247171642	-0.63586	5.6141	9.60739	0.0107067	0.318549
chr11_28129093_28130117	-0.566204	6.35676	9.60671	0.0107087	0.318549
chr1_158057154_158057591	-0.52851	5.56569	9.60349	0.0107184	0.318549
chr1_15058422_15058702	-6.4496	3.51201	11.4164	0.0107267	0.318549
chr1_219589839_219590402	-0.587116	6.04824	9.59842	0.0107337	0.318549
chr9_41936307_41936903	0.581822	5.21741	9.64253	0.0107391	0.318549
chr2_37193339_37194103	-0.593124	6.24806	9.59494	0.0107442	0.318549
chr5_64396891_64397189	-6.92573	3.8938	11.4079	0.0107458	0.318549
chr3_181568495_181569400	-0.689167	5.41541	9.57792	0.0107957	0.319543
chr21_9698859_9699342	0.953576	5.81701	9.57719	0.0107979	0.319543
chr1_6052058_6053082	-0.660304	5.16332	9.57468	0.0108055	0.319543
chr7_110317392_110318016	-0.660585	5.71349	9.57129	0.0108159	0.319569
chr9_1049846_1050703	-0.556003	7.06707	9.567	0.0108289	0.319569
chrUn_gl000216_22112_22635	3.33909	6.05047	9.56386	0.0108385	0.319569
chr16_46390861_46392578	1.15822	7.86293	9.5629	0.0108414	0.319569
chr8_58118350_58118840	6.98375	3.94727	11.3513	0.0108745	0.320243
chrX_61691443_61692333	1.02709	6.90215	9.54968	0.0108819	0.320243
chr10_42360550_42360928	1.00191	8.56437	9.54588	0.0108935	0.320328
chr7_58015189_58015406	6.9941	3.9526	11.3332	0.010916	0.320729
chr2_3184178_3184942	1.71592	5.87381	9.53186	0.0109367	0.320831
chr2_92305578_92308279	1.01877	8.36537	9.53162	0.0109374	0.320831
chr7_57551272_57551911	2.93403	5.87012	9.52891	0.0109458	0.320831
chr4_115963655_115964095	-6.9157	3.88651	11.3159	0.010956	0.320873
chr1_173793190_173794265	-0.457357	5.80817	9.52009	0.0109731	0.321114
chr8_106967641_106968140	6.44127	3.52821	11.2767	0.0110473	0.322901
chr19_20958886_20959211	6.45443	3.53125	11.2747	0.0110518	0.322901
chr1_160757759_160758480	6.45467	3.54025	11.2692	0.0110648	0.323021
chr3_139108071_139109169	-0.59318	6.0799	9.48126	0.0110941	0.323619
chr20_52364665_52365499	0.590824	7.28846	9.47794	0.0111045	0.323653
chr1_181245172_181245709	-0.57612	5.68519	9.47523	0.011113	0.323653
chr15_98503347_98504396	-0.588921	7.37929	9.4612	0.0111573	0.324682
chr2_190648426_190649725	-0.613587	5.89339	9.45589	0.0111741	0.324911
chr21_46920468_46920885	1.76625	5.01574	9.45151	0.0111879	0.325056
chr1_54518517_54519656	-0.665363	5.07656	9.44484	0.0112091	0.32519
chr7_84330961_84331608	-0.670067	5.16029	9.44444	0.0112104	0.32519
chr1_220219266_220220386	-0.485296	5.75764	9.43919	0.0112271	0.325327
chr11_13793866_13794435	-6.38743	3.47099	11.1944	0.0112419	0.325327
chr7_158152796_158153912	3.18265	4.53656	9.43343	0.0112455	0.325327
chr6_10415377_10415621	-6.92996	3.89099	11.1882	0.0112566	0.325327
chrUn_gl000241_4947_5486	6.95844	3.9276	11.1865	0.0112606	0.325327
chr9_122687133_122687472	-6.91175	3.88719	11.1832	0.0112686	0.325327
chr11_51572069_51572736	3.50344	5.6254	9.41993	0.0112886	0.325387
chr1_116004273_116004458	-6.93652	3.89553	11.1727	0.0112939	0.325387
chr1_84092879_84093765	6.42402	3.51299	11.1681	0.0113049	0.325387
chr12_107167638_107168703	-0.580301	5.81293	9.4144	0.0113063	0.325387
chr5_99852953_99853299	-1.44068	5.35468	9.41082	0.0113178	0.325461
chr14_45552914_45553829	-0.485004	6.02639	9.40458	0.0113379	0.325782
chr3_161057110_161058210	-0.789644	5.24011	9.3966	0.0113636	0.326083
chr8_110551375_110552834	-0.497409	8.09416	9.39518	0.0113682	0.326083
chr5_145826418_145827451	-0.496599	6.80041	9.39302	0.0113752	0.326083
chr9_101983779_101985009	-0.593342	5.34218	9.38978	0.0113857	0.326128
chr1_10013_10443	0.461647	5.69199	9.38465	0.0114023	0.326348
chr4_35910098_35910697	-0.720293	5.14735	9.37445	0.0114355	0.326849
chr4_38622600_38623046	6.41116	3.5037	11.1116	0.0114419	0.326849
chr4_120133302_120134579	-0.457008	6.27022	9.371	0.0114467	0.326849
chrUn_gl000216_80636_80913	2.6198	5.75125	9.35531	0.011498	0.328056
chr12_12038199_12038728	6.41334	3.50509	11.0825	0.0115134	0.328239
chr3_24201881_24202311	-6.38886	3.46685	11.0699	0.0115446	0.328761
chr2_89872069_89872546	0.971802	8.57159	9.3373	0.0115571	0.328761
chr13_110651034_110651471	-0.773353	4.99374	9.33682	0.0115587	0.328761
chr10_26719726_26720068	6.40372	3.4994	11.0557	0.0115798	0.329
chr1_84464237_84465325	-0.692442	5.08858	9.32718	0.0115906	0.329
chr1_114825024_114825886	-0.408713	7.47773	9.32609	0.0115942	0.329
chr20_35723935_35724706	6.40634	3.5031	11.0383	0.0116231	0.329511
chr8_27168390_27169268	-0.53337	5.75985	9.31521	0.0116302	0.329511
chr2_137226608_137227025	-6.35215	3.44963	11.0254	0.0116553	0.329781
chr12_45342325_45342992	-0.543775	5.77966	9.30691	0.0116578	0.329781
chr3_133969061_133969974	-0.618221	5.01028	9.29812	0.0116872	0.330258
chr12_80543202_80543875	-0.832657	4.88382	9.29615	0.0116937	0.330258
chr3_156956689_156957357	-0.744127	5.77815	9.29373	0.0117018	0.330258
chr6_131952665_131952968	-6.90003	3.86829	10.9915	0.0117407	0.331098
chrX_152599242_152599990	-0.762152	4.90133	9.27519	0.0117641	0.331502
chr12_133841516_133841885	0.823832	5.99327	9.27092	0.0117784	0.33151
chr5_9927423_9927894	6.42147	3.50486	10.9742	0.0117845	0.33151
chr12_67662233_67663568	-0.570523	6.06795	9.25885	0.0118193	0.33151
chr17_58754349_58755693	-0.575511	9.66324	9.25642	0.0118275	0.33151
chr6_84569028_84570069	-0.554177	5.96655	9.25642	0.0118275	0.33151
chr1_178470788_178471152	-6.87499	3.85416	10.9566	0.0118292	0.33151
chr8_112126111_112127092	-0.394175	6.14406	9.2553	0.0118313	0.33151
chr2_210233013_210234115	-0.665766	5.95416	9.25319	0.0118384	0.33151
chr14_81053488_81053723	-6.37937	3.45759	10.95	0.0118461	0.33151
chrX_137108335_137108663	-6.87525	3.85317	10.9449	0.0118592	0.331622
chr4_111331964_111333014	-0.83178	5.03541	9.24196	0.0118766	0.331853
chr1_98519530_98520118	-0.743371	5.20433	9.23253	0.0119088	0.331915
chr17_59488911_59490176	0.496766	8.28409	9.23182	0.0119112	0.331915
chr14_97912384_97912739	-6.42286	3.48735	10.9236	0.0119138	0.331915
chr1_167189272_167190190	-0.461004	5.98163	9.23065	0.0119152	0.331915
chr3_191808429_191808712	-6.88872	3.86329	10.908	0.0119539	0.332509
chr8_134309337_134310306	-0.420061	6.05346	9.53744	0.0119547	0.332509
chrX_149000752_149001134	-6.86795	3.84888	10.8997	0.0119756	0.332636
chr1_237963105_237963453	-0.596491	5.8374	9.21248	0.0119775	0.332636
chr12_82751949_82753146	-0.489316	6.6827	9.209	0.0119895	0.332716
chr8_122842225_122842547	-6.88924	3.86092	10.8825	0.0120202	0.33315
chr14_59654636_59655900	-0.498455	6.48495	9.19797	0.0120276	0.33315
chr7_8007927_8008958	-0.436392	6.20059	9.19482	0.0120385	0.33315
chr3_25824377_25825465	-0.661292	6.02929	9.19163	0.0120495	0.33315
chr14_46666392_46667281	6.36722	3.47245	10.8708	0.0120508	0.33315
chr10_28591426_28592340	-0.439652	5.9786	9.18832	0.012061	0.333179
chr7_133538465_133538996	-0.554026	5.49354	9.18338	0.0120781	0.333401
chr7_91808221_91808570	-0.768231	5.18884	9.1713	0.0121202	0.334127
chr1_174083918_174084489	-0.463468	5.58656	9.17058	0.0121228	0.334127
chr15_65321491_65322088	6.36341	3.46791	10.8316	0.0121537	0.334622
chr14_77315307_77315545	-6.31814	3.42359	10.8286	0.0121616	0.334622
chrUn_gl000226_759_2037	1.15106	8.27661	9.1575	0.0121685	0.334622
chr3_152016162_152017239	-0.610197	5.17604	9.15462	0.0121786	0.334622
chr5_149789429_149789590	-6.87901	3.85619	10.8192	0.0121866	0.334622
chr2_35680137_35680585	-0.647354	5.25886	9.14739	0.012204	0.334849
chr3_64195199_64196289	-0.469314	7.63701	9.14461	0.0122138	0.334866
chr2_156672175_156672736	-0.688106	5.48971	9.14001	0.01223	0.334872
chrX_106242345_106243757	-0.658455	5.2576	9.13934	0.0122324	0.334872
chr7_76751019_76752133	-0.411893	6.52935	9.13139	0.0122605	0.33527
chr8_97377347_97377977	-0.656609	5.28545	9.13003	0.0122653	0.33527
chr14_28790821_28791233	-6.33333	3.4314	10.7841	0.0122799	0.335417
chr2_48961345_48962010	6.34961	3.45923	10.7781	0.012296	0.335462
chrUn_gl000225_97041_97257	2.81745	6.39617	9.12027	0.0122999	0.335462
chr12_101468512_101469058	-6.31848	3.41915	10.7693	0.0123197	0.335751
chr5_146257680_146258467	-0.522493	5.42229	9.11213	0.0123289	0.335751
chr14_54833428_54834132	-0.579194	5.33373	9.10445	0.0123563	0.336245
chr13_21976869_21977544	6.34792	3.45577	10.7434	0.0123896	0.336542
chr11_82611288_82612951	-0.537134	5.86166	9.09476	0.012391	0.336542
chr5_111092955_111094027	-0.425538	5.91014	9.09255	0.0123989	0.336542
chr5_121297123_121298131	-0.575815	6.12574	9.09111	0.012404	0.336542
chr1_4363149_4363346	6.90223	3.88483	10.7255	0.012438	0.337212
chr8_123651058_123651713	-0.703765	5.44988	9.06844	0.0124857	0.338254
chr8_128812600_128813903	-0.551093	6.16557	9.06438	0.0125004	0.338401
chr5_45454176_45454501	7.01221	3.95792	10.6906	0.0125334	0.338809
chr18_18512840_18513290	1.12684	7.42496	9.05511	0.012534	0.338809
chr1_193090724_193091822	-0.399393	6.76061	9.05204	0.0125452	0.33886
chrUn_gl000216_136545_136912	0.831113	7.04199	9.04654	0.0125652	0.338963
chr20_52237999_52238668	0.440452	6.96656	9.04461	0.0125723	0.338963
chr1_150533550_150534414	0.60857	5.36085	9.04335	0.0125769	0.338963
chr6_61912905_61913509	1.95968	5.51127	9.03608	0.0126034	0.339191
chr5_147525200_147525795	-0.751412	5.23934	9.03594	0.0126039	0.339191
chr12_8113227_8113716	6.32305	3.44125	10.6584	0.0126224	0.339434
chr1_222060245_222060918	-0.537579	5.91989	9.02839	0.0126316	0.339434
chr20_30134882_30135258	-6.27748	3.39089	10.6502	0.0126452	0.339551
chrY_13842631_13843045	0.910609	7.23937	9.01447	0.0126828	0.340309
chr2_209522281_209522493	-6.85145	3.83316	10.6086	0.0127613	0.342165
chr1_174992104_174993052	-0.635563	5.85334	8.98673	0.0127855	0.342562
chr5_109075514_109076168	6.3083	3.42961	10.5934	0.0128041	0.342807
chr5_96528453_96529539	-0.662965	5.52737	8.97775	0.012819	0.342956
chr2_225774732_225775204	-1.55049	4.93066	8.9745	0.0128311	0.342975
chr5_150786000_150786340	-6.26768	3.38193	10.5805	0.0128407	0.342975
chr1_155161097_155161615	1.87005	5.90404	8.97001	0.0128479	0.342975
chr5_162932288_162933415	-0.568447	6.35884	8.95849	0.0128912	0.34352
chr17_61522964_61524245	0.481967	5.86923	8.95707	0.0128965	0.34352
chr3_133291997_133293106	-0.408512	6.21266	8.95547	0.0129025	0.34352
chr3_138312635_138313905	-0.486828	5.8837	8.95454	0.012906	0.34352
chr7_1311765_1312452	6.91623	3.89348	10.5456	0.0129401	0.343804
chrX_85302105_85302870	-0.668652	4.97863	8.94428	0.0129447	0.343804
chr4_49318034_49319029	0.986647	5.99268	8.94084	0.0129577	0.343804
chrX_37706503_37707109	-0.567766	5.23633	8.94023	0.01296	0.343804
chr18_18518110_18520333	1.03703	8.68486	8.93923	0.0129638	0.343804
chr21_21226043_21226561	6.31509	3.43335	10.5211	0.0130105	0.34479
chr6_114291135_114292777	-0.495792	5.55745	9.79828	0.0130198	0.34479
chr11_93276491_93276867	-6.27247	3.38937	10.5116	0.0130377	0.345013
chrX_58572560_58573304	3.08146	5.60557	8.90297	0.0131019	0.346459
chr8_22960318_22960842	6.28691	3.41311	10.4777	0.0131362	0.346608
chr2_110774075_110774570	6.28345	3.41123	10.4724	0.0131517	0.346608
chr13_108870399_108871200	-0.674189	4.99648	8.88646	0.0131654	0.346608
chr1_196960818_196961760	-0.562455	6.83623	8.88523	0.0131701	0.346608
chr20_58625329_58625631	-0.537745	6.0747	8.88455	0.0131727	0.346608
chr2_43696307_43696750	6.2979	3.42016	10.4648	0.0131738	0.346608
chr8_122654083_122654978	-0.77982	5.42727	8.88146	0.0131846	0.346608
chrUn_gl000216_1194_2016	1.02695	7.4154	8.8782	0.0131973	0.346608
chr3_27674076_27674940	-0.547686	5.13192	9.0367	0.0132114	0.346608
chrUn_gl000212_40527_41300	1.07482	6.25213	8.87083	0.0132258	0.346608
chr6_118971728_118973113	-0.509935	5.72618	8.86854	0.0132347	0.346608
chr20_54666756_54666978	6.87302	3.85984	10.4434	0.0132366	0.346608
chr3_64741429_64742676	0.484371	5.77208	8.86708	0.0132403	0.346608
chr2_64276978_64277354	6.27942	3.4064	10.4344	0.0132632	0.346608
chr2_184159835_184160420	-0.857345	5.3575	8.86049	0.0132659	0.346608
chr20_52296285_52296957	0.58654	6.39756	8.8602	0.0132671	0.346608
chr5_98926574_98927113	6.28702	3.4116	10.4309	0.0132737	0.346608
chr5_158937375_158937703	-0.667753	5.58315	8.85602	0.0132834	0.346608
chr9_44879848_44880101	6.92329	3.89466	10.4215	0.0133015	0.346608
chr10_1094514_1095680	-0.435203	6.52351	8.84799	0.0133147	0.346608
chrX_137187364_137188148	-0.664153	5.26332	8.84777	0.0133155	0.346608
chr1_59165293_59166009	-0.706695	4.92265	8.8441	0.0133299	0.346608
chr12_81262123_81262826	-0.605876	5.70794	8.84101	0.013342	0.346608
chr3_168388802_168389346	-0.805615	5.49377	8.84096	0.0133422	0.346608
chr3_66270847_66271934	-0.499088	6.034	8.84025	0.013345	0.346608
chr2_158682289_158682921	-0.763148	5.52884	8.83541	0.013364	0.346855
chr2_153915944_153916509	0.714076	4.89331	8.83093	0.0133816	0.347065
chr7_87505139_87506477	-0.566352	6.52047	8.82434	0.0134075	0.34749
chr15_54161185_54161586	-6.82736	3.81029	10.3633	0.0134754	0.348553
chr5_93446798_93447670	-0.514421	6.5143	8.80684	0.0134767	0.348553
chr11_83592593_83592751	-6.82355	3.8104	10.3583	0.0134903	0.348553
chr20_52817335_52818175	0.494208	7.33719	8.80093	0.0135001	0.348553
chr5_108083823_108085226	-0.502839	7.12306	8.79968	0.0135051	0.348553
chr8_144679049_144679939	-6.82011	3.8069	10.3532	0.0135058	0.348553
chr20_4201948_4202278	6.25817	3.39259	10.3484	0.0135202	0.348678
chr3_134204360_134205673	-0.674126	5.51971	8.78661	0.0135572	0.349385
chr3_4729954_4730412	-0.577578	5.37991	8.78156	0.0135774	0.349658
chr21_19190999_19192410	-0.498286	5.58345	8.77599	0.0135997	0.349913
chrUn_gl000226_3101_3637	1.05749	8.52086	8.7743	0.0136064	0.349913
chr4_83205768_83206562	-0.580282	7.06495	8.76606	0.0136395	0.350449
chr7_109219492_109219957	6.27048	3.402	10.307	0.0136465	0.350449
chr3_61992748_61993746	0.39432	6.37951	8.74893	0.0137087	0.351678
chr7_48074813_48075780	-0.467632	6.04924	8.74771	0.0137136	0.351678
chr15_51199878_51201623	0.493658	5.37384	9.33599	0.013746	0.351939
chr9_112107621_112108300	-0.652928	5.20858	8.73585	0.0137617	0.351939
chr3_18799435_18800035	-0.498998	5.763	8.73342	0.0137716	0.351939
chr8_107738072_107738594	-0.409101	6.95083	8.72744	0.013796	0.351939
chrUn_gl000216_18270_18578	2.05097	6.07313	8.72677	0.0137987	0.351939
chr2_212869926_212870237	-6.78971	3.78826	10.2574	0.0137992	0.351939
chr8_19029296_19029538	-6.79329	3.79262	10.2573	0.0137997	0.351939
chr1_97709565_97709910	-6.00266	3.20414	10.2559	0.0138039	0.351939
chr10_39148828_39149384	3.02951	5.46459	8.72386	0.0138106	0.351939
chrX_146992973_146993541	-0.690498	5.66295	8.72044	0.0138246	0.351951
chr2_888507_889465	-0.513317	6.4908	8.71562	0.0138443	0.351951
chr4_186064181_186064846	-6.07663	3.25271	10.2428	0.0138447	0.351951
chr7_102884868_102885804	-0.482872	5.83903	8.71394	0.0138512	0.351951
chr16_46404928_46405930	3.40792	6.49863	8.70989	0.0138678	0.351951
chr20_45988975_45989951	0.449025	7.24987	8.70931	0.0138702	0.351951
chr6_26440276_26440988	6.24931	3.38502	10.232	0.0138786	0.351951
chr1_207510467_207510775	-6.16926	3.31609	10.2283	0.01389	0.351996
chrX_129326194_129326656	-6.05968	3.23491	10.2161	0.0139283	0.352721
chr11_117049141_117049834	-6.04196	3.22111	10.1892	0.0140131	0.354624
chr17_22252958_22253791	0.917272	8.62751	8.66799	0.0140411	0.354674
chr5_83689753_83690205	6.22692	3.36955	10.1804	0.0140412	0.354674
chrX_120331380_120331646	-6.15915	3.30357	10.1794	0.0140443	0.354674
chr10_16859007_16860068	-0.437945	7.01768	8.66295	0.0140621	0.354878
chr4_136784989_136785844	-0.452371	6.37783	8.65562	0.0140927	0.355144
chr6_121069589_121070107	-6.02966	3.21358	10.164	0.0140934	0.355144
chr21_47604273_47604951	0.541865	7.01466	8.65344	0.0141018	0.355144
chr4_138928657_138929032	-6.7832	3.77935	10.1552	0.0141216	0.355396
chr14_105987122_105987646	6.86142	3.8562	10.1506	0.0141363	0.355521
chr1_167443731_167444035	-6.15925	3.30268	10.1454	0.0141528	0.355691
chr2_179756081_179756597	-0.557199	5.23023	8.71351	0.014174	0.355978
chr8_128888345_128888587	-6.79901	3.78794	10.1291	0.0142054	0.35646
chr3_67048075_67049215	-0.38935	6.2519	8.6271	0.0142127	0.35646
chr3_38038409_38038644	-6.77177	3.77266	10.1062	0.0142794	0.357888
chr1_183029550_183030176	-0.768604	5.42511	8.60598	0.0143023	0.35797
chr12_84902137_84902766	-0.497507	5.90458	8.60597	0.0143023	0.35797
chr6_52535524_52536174	-0.547492	5.6375	8.59031	0.0143692	0.359398
chr6_148899426_148899826	-0.735959	5.13569	8.5765	0.0144285	0.360161
chr5_32312456_32313685	-0.4184	6.0482	8.5762	0.0144298	0.360161
chr5_179159349_179160386	-0.645884	5.57504	8.57572	0.0144319	0.360161
chr12_103310831_103311572	-0.626807	5.1709	8.57402	0.0144392	0.360161
chr9_117160013_117161019	-0.550582	5.79487	8.57071	0.0144535	0.360169
chr10_98955857_98956646	6.20188	3.35107	10.0485	0.0144681	0.360169
chr6_130030745_130031734	-0.439795	6.28115	8.56708	0.0144691	0.360169
chr15_42066291_42067134	-0.483258	5.43918	8.5618	0.014492	0.360491
chr20_23338522_23339097	-0.390152	6.15245	8.5593	0.0145028	0.360515
chr12_76477686_76479117	-0.500477	6.3986	8.54747	0.0145541	0.361545
chr3_21660279_21660831	5.86307	3.12477	10.0127	0.014587	0.362071
chr20_58530200_58530784	-0.493558	5.35367	8.91025	0.0145959	0.362071
chr8_128964247_128964719	-0.668512	6.14602	8.53578	0.0146051	0.362071
chr10_42379879_42380508	0.978284	9.60862	8.53177	0.0146226	0.36226
chr2_182818887_182819465	-0.743798	4.88164	8.52271	0.0146623	0.362739
chr9_104295610_104296520	-0.537823	6.91941	8.51779	0.0146839	0.362739
chr2_170060345_170060762	5.90394	3.14892	9.98209	0.0146893	0.362739
chr7_158380336_158380662	-6.75261	3.76037	9.97148	0.0147251	0.362739
chr16_33875590_33876043	1.65771	5.6095	8.50772	0.0147283	0.362739
chr4_152329813_152330844	-0.588033	6.01904	8.50427	0.0147435	0.362739
chr4_67933599_67934240	5.99861	3.21449	9.95105	0.0147942	0.362739
chr21_40159407_40159985	-0.536896	5.19981	8.63485	0.014812	0.362739
chr5_174442180_174442652	5.97204	3.19508	9.94493	0.014815	0.362739
chr4_111543489_111544567	-0.591132	6.60857	8.48664	0.0148217	0.362739
chr2_263858_265196	-0.415715	6.27978	8.48419	0.0148326	0.362739
chr1_165122055_165122245	-6.7734	3.76778	9.93896	0.0148353	0.362739
chrY_13859603_13860203	1.07103	7.00377	8.48184	0.014843	0.362739
chr10_42395909_42396937	1.05374	9.1191	8.47552	0.0148712	0.362739
chr20_22493190_22493582	6.10811	3.28714	9.92628	0.0148786	0.362739
chr7_129690732_129691335	6.03858	3.23858	9.91669	0.0149114	0.362739
chr5_52549303_52549770	6.13168	3.30189	9.90851	0.0149395	0.362739
chr1_207793478_207793963	-0.539236	5.33091	8.45994	0.0149409	0.362739
chr11_125462156_125463153	-0.488065	5.64668	8.4563	0.0149573	0.362739
chrY_13861901_13862168	0.997564	6.1231	8.45452	0.0149653	0.362739
chr8_111746254_111746430	-6.76171	3.76075	9.89632	0.0149815	0.362739
chr1_244624149_244625193	-0.510895	6.05426	8.44789	0.0149952	0.362739
chr21_16249805_16250376	6.10272	3.28618	9.89014	0.0150029	0.362739
chr17_53315426_53316426	-0.446157	6.48614	8.44237	0.0150201	0.362739
chr8_1845526_1845858	-1.36499	5.16063	8.43735	0.0150428	0.362739
chr9_44992452_44993455	1.15785	5.3663	8.43684	0.0150451	0.362739
chr6_27486325_27487517	6.15713	3.32529	9.87112	0.0150688	0.362739
chr2_88124409_88124867	-0.84537	9.971	8.42764	0.0150868	0.362739
chr2_190152573_190153047	6.01562	3.22111	9.86512	0.0150896	0.362739
chr9_128263053_128263630	6.01761	3.2253	9.86416	0.015093	0.362739
chr6_96748973_96749333	-6.74126	3.75023	9.86404	0.0150934	0.362739
chr8_104883487_104884399	-0.711818	5.22158	8.42285	0.0151086	0.362739
chrX_130422915_130423543	-0.643377	5.27039	8.41006	0.0151669	0.362739
chr2_179279307_179279835	-0.433157	6.11616	8.40952	0.0151694	0.362739
chr17_67331287_67331592	-6.73826	3.74554	9.83547	0.0151933	0.362739
chr17_67322567_67323921	-0.378174	7.11715	8.40207	0.0152035	0.362739
chrX_139014180_139015881	-0.588436	5.19028	8.3994	0.0152158	0.362739
chr17_60256993_60257475	6.79762	3.80104	9.82202	0.0152407	0.362739
chr2_213770217_213771158	-0.547707	5.98259	8.3933	0.0152438	0.362739
chr12_90345032_90345635	-0.581468	5.21773	8.39192	0.0152501	0.362739
chr6_145508499_145509106	-0.661213	5.26659	8.38645	0.0152753	0.362739
chr11_51590360_51591357	1.01938	8.22628	8.38386	0.0152873	0.362739
chr20_52789989_52791302	0.525675	6.68443	8.38135	0.0152989	0.362739
chr10_97453251_97454086	-0.437576	5.91457	8.38063	0.0153022	0.362739
chr2_739979_740923	-0.462964	8.63728	8.37486	0.0153289	0.362739
chr7_6543112_6544239	-0.419833	5.87006	8.37181	0.015343	0.362739
chr2_164225311_164225973	-0.69743	5.27541	8.36289	0.0153844	0.362739
chr12_104026153_104026880	-0.578026	5.24916	8.35657	0.0154139	0.362739
chr4_140374228_140375529	-0.567103	5.62037	8.35106	0.0154396	0.362739
chr3_11887373_11888686	-0.620851	5.45629	8.34844	0.0154518	0.362739
chr6_116550102_116550921	-0.627803	5.89786	8.34221	0.015481	0.362739
chr1_107559228_107559675	2.53062	4.80818	8.34214	0.0154813	0.362739
chr9_38069345_38069992	-0.577289	5.11203	8.3406	0.0154885	0.362739
chr7_89699644_89700061	-0.698932	5.62806	8.32829	0.0155463	0.362739
chr3_8543003_8543593	-0.478852	6.51438	8.32458	0.0155638	0.362739
chr1_154974346_154974869	-6.75153	3.74875	9.73159	0.0155638	0.362739
chr1_143913024_143914153	-0.387706	7.19928	8.32244	0.0155739	0.362739
chr4_120221214_120222202	-0.576437	6.02783	8.32068	0.0155822	0.362739
chr2_3383282_3384116	-0.527247	5.88017	8.31708	0.0155993	0.362739
chr7_14029964_14031425	-0.60415	6.20879	8.30813	0.0156417	0.362739
chr3_39192750_39193038	-6.73965	3.74164	9.70381	0.0156649	0.362739
chr5_82903845_82904269	-6.73965	3.74164	9.70381	0.0156649	0.362739
chr12_89746027_89746853	-0.588395	5.68124	8.30294	0.0156663	0.362739
chr15_34501808_34502536	-0.538632	5.45489	8.3022	0.0156698	0.362739
chr6_96463073_96464629	-0.459317	5.84301	8.29753	0.015692	0.362739
chr7_154568686_154569064	-6.73117	3.73884	9.69195	0.0157083	0.362739
chr20_46168850_46169962	1.94051	5.25735	8.29293	0.015714	0.362739
chr8_77912097_77913199	-0.437273	6.77584	8.29262	0.0157154	0.362739
chr7_112054896_112055240	-6.79134	3.77484	9.68527	0.0157328	0.362739
chr7_134530343_134530577	-6.73043	3.74174	9.68523	0.0157329	0.362739
chr2_133151516_133151956	6.79205	3.79814	9.68384	0.015738	0.362739
chr20_29825188_29825556	3.34068	4.74353	8.28215	0.0157655	0.362739
chr10_113899908_113900228	-0.549214	5.93465	8.27619	0.0157941	0.362739
chr17_59308384_59309063	0.463609	6.57777	8.27544	0.0157977	0.362739
chr11_84610831_84611084	-6.71972	3.72936	9.66538	0.015806	0.362739
chr1_49143100_49143294	-6.71492	3.72842	9.65527	0.0158434	0.362739
chr1_218085191_218085736	-6.78388	3.76967	9.65293	0.0158521	0.362739
chr12_69186674_69187014	-6.70701	3.72502	9.65206	0.0158553	0.362739
chr7_153078740_153079050	-6.71152	3.72485	9.64928	0.0158656	0.362739
chr3_54925480_54926011	-0.794298	4.83807	8.26076	0.0158684	0.362739
chr1_121351938_121352591	0.967472	7.25575	8.26044	0.0158699	0.362739
chr17_22259413_22261879	0.966067	7.94489	8.25765	0.0158834	0.362739
chr7_87094231_87094995	-0.509847	5.85714	8.25542	0.0158942	0.362739
chr3_138553150_138554215	-0.532156	5.45082	8.25411	0.0159005	0.362739
chrX_102406938_102407425	-0.637179	5.71882	8.2514	0.0159136	0.362739
chr12_98986767_98988057	-0.865018	6.16009	8.24821	0.0159291	0.362739
chr6_71122725_71123573	-0.529471	5.62131	8.24183	0.0159601	0.362739
chrX_105545264_105546004	-0.601271	5.38134	8.23493	0.0159936	0.362739
chr1_107298209_107298860	0.446915	5.90882	8.2346	0.0159953	0.362739
chr12_125721518_125722052	-0.563387	5.66184	8.23178	0.016009	0.362739
chr8_107218324_107218932	6.80959	3.80371	9.60271	0.0160397	0.362739
chr1_180126734_180127111	-6.72324	3.73234	9.59777	0.0160583	0.362739
chr2_197035644_197036726	-0.504574	5.95212	8.22105	0.0160614	0.362739
chr2_38152064_38152954	-0.453375	5.74281	8.21779	0.0160774	0.362739
chr11_51580144_51581085	0.825335	8.03527	8.21646	0.0160839	0.362739
chr15_20305794_20306915	1.66461	5.95009	8.21466	0.0160928	0.362739
chr1_174128001_174129546	-0.571495	6.26931	8.21061	0.0161127	0.362739
chr12_74902583_74903340	-0.585538	5.44144	8.20994	0.016116	0.362739
chr5_157375854_157376279	-0.496762	5.64501	8.20909	0.0161201	0.362739
chr11_51569657_51570249	0.986152	6.79801	8.20851	0.016123	0.362739
chr1_197743876_197745151	-0.476609	5.73688	8.67206	0.0161412	0.362739
chr8_126840861_126841400	-2.66125	5.10779	8.19989	0.0161655	0.362739
chr7_144052053_144052957	-0.476459	6.35251	8.19983	0.0161658	0.362739
chr8_122157617_122158244	-0.66193	5.99805	8.19481	0.0161906	0.362739
chr3_153224184_153224921	-0.610947	6.08863	8.1926	0.0162015	0.362739
chr6_130257610_130258125	-0.554176	5.1845	8.18975	0.0162156	0.362739
chr2_169204681_169204992	-6.71046	3.72625	9.55586	0.0162173	0.362739
chr20_53552248_53552896	2.41613	5.14828	8.18791	0.0162248	0.362739
chr5_16776621_16777021	-6.76941	3.75746	9.54635	0.0162536	0.362739
chr6_132833770_132834642	-0.474301	6.30922	8.18024	0.0162628	0.362739
chr12_62653220_62654889	-0.67876	6.38913	8.18021	0.016263	0.362739
chr6_72595960_72596949	0.547503	5.30024	8.17412	0.0162933	0.362739
chr2_215175164_215176164	-0.697606	5.34823	8.1706	0.0163109	0.362739
chr3_15900466_15902259	-0.444929	5.75387	10.7216	0.016327	0.362739
chr2_92315225_92316375	2.22302	8.87788	8.16554	0.0163361	0.362739
chr1_89458111_89458999	-0.487918	5.97192	8.16323	0.0163477	0.362739
chr3_63319288_63320073	0.54015	5.30025	8.15668	0.0163805	0.362739
chr3_157290318_157290861	-0.657259	4.97461	8.14917	0.0164182	0.362739
chr3_16458796_16459338	-6.70509	3.71641	9.50113	0.0164279	0.362739
chr4_124509192_124509940	-0.489458	5.92067	8.14672	0.0164305	0.362739
chr5_107716972_107718637	-0.518582	6.08666	8.14069	0.0164609	0.362739
chr10_135333589_135334144	-0.726404	4.94774	8.14051	0.0164618	0.362739
chr1_109608827_109609234	-6.72051	3.72501	9.48294	0.0164987	0.362739
chr17_60094666_60095820	0.929649	4.82191	8.13289	0.0165003	0.362739
chr21_9695774_9696203	0.64021	6.18901	8.13086	0.0165106	0.362739
chr2_228410676_228411278	-0.710476	4.97798	8.12372	0.0165468	0.362739
chr15_34393583_34394561	-0.561767	5.44767	8.11798	0.016576	0.362739
chr1_244815949_244816800	-0.351057	6.56625	8.11798	0.016576	0.362739
chr2_197664014_197664586	-0.534116	5.14326	8.57591	0.0165875	0.362739
chr10_54073442_54074737	-0.736337	5.02512	8.10846	0.0166245	0.362739
chr9_82104233_82104915	-0.480294	5.55631	8.10677	0.0166331	0.362739
chr2_201827857_201828802	-0.449404	5.8334	8.09126	0.0167126	0.362739
chrY_13140128_13141375	1.12479	6.32588	8.08942	0.0167221	0.362739
chr8_110241305_110242093	0.515133	5.37498	8.08155	0.0167626	0.362739
chr1_209763905_209764076	-6.68497	3.70279	9.41512	0.0167661	0.362739
chr16_75130695_75130904	-6.66735	3.69722	9.40529	0.0168053	0.362739
chr10_3214684_3215744	-0.498823	6.70986	8.07264	0.0168086	0.362739
chr12_75197113_75197294	-6.69233	3.70729	9.4007	0.0168236	0.362739
chr4_165271829_165272537	-0.641755	4.97192	8.06885	0.0168282	0.362739
chr5_74632165_74633332	-0.386787	5.94007	9.93803	0.0168529	0.362739
chr2_198174738_198176085	-0.588011	5.51289	8.05694	0.0168901	0.362739
chr20_52341683_52342346	0.470493	6.82638	8.05226	0.0169145	0.362739
chr7_113728451_113728831	-6.66818	3.69216	9.37653	0.0169207	0.362739
chrUn_gl000214_29972_31024	0.530884	5.73899	8.04107	0.0169729	0.362739
chr2_17352521_17353212	-0.488828	5.86852	8.03836	0.0169872	0.362739
chr6_148512708_148513645	-0.572304	5.62249	8.03644	0.0169972	0.362739
chr8_133724011_133724975	0.636305	4.96968	8.03019	0.01703	0.362739
chr8_43094370_43095396	0.976538	10.3184	8.02947	0.0170338	0.362739
chr3_42003119_42004083	-0.770103	5.5708	8.02916	0.0170354	0.362739
chr5_56469099_56470092	-0.533369	5.74217	8.02519	0.0170563	0.362739
chr5_167391668_167391841	-6.66901	3.69189	9.33228	0.0171003	0.362739
chrY_13813465_13813971	1.87109	5.49417	8.01619	0.0171038	0.362739
chr7_78685167_78685779	-0.635238	5.27102	8.01567	0.0171065	0.362739
chr2_118770816_118772187	0.506853	5.35887	8.57725	0.0171522	0.362739
chr6_105307086_105308288	-0.447334	6.0011	8.006	0.0171578	0.362739
chr1_224200200_224200947	6.7697	3.7709	9.30252	0.0172224	0.362739
chr7_57927555_57928215	6.72478	3.74188	9.30236	0.017223	0.362739
chr2_92319818_92320744	0.93541	8.49386	7.97512	0.0173225	0.362739
chr8_121968836_121969366	-0.537196	5.42125	7.9657	0.0173731	0.362739
chr1_164095558_164096403	-0.453122	6.51268	7.96275	0.017389	0.362739
chr3_153777507_153778147	-0.54642	6.08455	7.95777	0.0174159	0.362739
chr12_76952565_76953992	-0.43902	5.83466	8.58268	0.0174169	0.362739
chr1_59249490_59250417	-0.457802	5.96833	7.95749	0.0174173	0.362739
chr3_135914298_135916046	-0.392801	5.97865	9.29267	0.01744	0.362739
chr2_208575607_208576955	-0.430646	5.79942	7.95325	0.0174403	0.362739
chr5_120444352_120444830	-0.612975	5.74853	7.95305	0.0174413	0.362739
chr9_4792190_4793458	-0.487279	5.75914	7.95283	0.0174426	0.362739
chr1_164527996_164528615	-0.463654	6.16533	7.95176	0.0174483	0.362739
chr12_65283508_65284053	-0.472285	5.52025	8.91376	0.0175146	0.362739
chr2_226135643_226135800	-6.65806	3.67969	9.22503	0.0175456	0.362739
chr7_137686340_137687273	-0.370362	6.70867	7.92947	0.0175695	0.362739
chr18_72162963_72164170	-0.628855	5.01504	7.92809	0.017577	0.362739
chr2_133045248_133045624	6.72215	3.74961	9.21395	0.0175925	0.362739
chr10_39107188_39107548	0.864412	6.60057	7.92116	0.0176149	0.362739
chr8_126656687_126657218	-0.46756	6.32276	7.91511	0.0176481	0.362739
chr16_28082066_28082372	6.6992	3.72468	9.19874	0.0176571	0.362739
chr8_92052578_92053668	-0.626351	6.00196	7.91064	0.0176726	0.362739
chr7_87974494_87974970	-6.64452	3.67416	9.19226	0.0176846	0.362739
chr9_116163257_116164026	-0.45441	5.77467	7.90698	0.0176927	0.362739
chr18_59102410_59102738	-6.63297	3.66315	9.1876	0.0177046	0.362739
chr11_13298553_13299972	-0.613832	5.75665	7.90239	0.017718	0.362739
chr3_157217154_157218103	-0.651564	6.24947	7.90034	0.0177293	0.362739
chr5_102116244_102116632	-6.64566	3.67261	9.18125	0.0177317	0.362739
chr17_22245406_22246861	1.08835	6.79531	7.89954	0.0177338	0.362739
chr19_44914892_44915774	2.07752	5.45059	7.89614	0.0177525	0.362739
chr2_182879135_182879316	-6.62898	3.66074	9.17092	0.017776	0.362739
chr7_37248018_37248345	6.70901	3.72855	9.16384	0.0178064	0.362739
chr20_52421922_52422927	0.499335	7.83453	7.88513	0.0178135	0.362739
chr10_17390374_17391154	-0.525187	5.90494	7.8812	0.0178354	0.362739
chr20_47131486_47132932	0.974688	8.34655	7.87983	0.017843	0.362739
chr3_157260905_157261418	-0.638715	5.04957	7.87521	0.0178687	0.362739
chr1_63832914_63833976	-0.445627	5.67471	7.87149	0.0178894	0.362739
chr6_154769606_154769806	-6.64948	3.67804	9.13979	0.0179102	0.362739
chr2_92289997_92291620	1.04407	8.82266	7.86356	0.0179337	0.362739
chr4_83350361_83351971	-0.48965	5.35417	7.86249	0.0179397	0.362739
chr4_20701649_20702496	-0.648836	6.2119	7.86023	0.0179523	0.362739
chr2_182756163_182757577	-0.416547	5.97401	7.85526	0.0179802	0.362739
chr6_5260433_5261916	-0.844221	4.8296	7.85371	0.0179889	0.362739
chr4_166299873_166300678	-0.56935	5.9965	7.8515	0.0180013	0.362739
chr7_105649590_105650517	-0.407752	6.22105	7.84954	0.0180123	0.362739
chr2_207629499_207630811	-0.446748	5.52311	8.23523	0.0180269	0.362739
chr9_88896830_88898091	-0.455812	5.54767	8.77502	0.0180269	0.362739
chr20_52522656_52523323	0.505669	7.10713	7.84399	0.0180436	0.362739
chr4_128885231_128885522	6.68892	3.71448	9.10055	0.0180813	0.362739
chrUn_gl000214_118239_118689	1.90152	5.8651	7.83678	0.0180843	0.362739
chr7_91686423_91687026	-0.620511	5.44879	7.83212	0.0181106	0.362739
chr8_43095761_43096176	0.901313	10.018	7.82855	0.0181309	0.362739
chr8_20054453_20055294	-0.450625	5.66172	7.81805	0.0181905	0.362739
chr9_91925275_91926389	-0.531793	5.2194	7.81522	0.0182066	0.362739
chrX_61839211_61839647	3.08775	4.66443	7.81375	0.018215	0.362739
chr5_145582635_145583548	-0.453568	6.9146	7.81283	0.0182202	0.362739
chr2_36630619_36631363	-0.474647	5.55386	7.80868	0.0182439	0.362739
chr12_110010917_110011817	-0.481126	5.47514	7.80232	0.0182803	0.362739
chr20_29900991_29901636	0.526743	5.24358	8.42719	0.0183226	0.362739
chr14_81636361_81637270	-0.415935	6.17529	7.79027	0.0183494	0.362739
chr5_114961244_114962337	-0.525892	6.13309	7.78549	0.0183769	0.362739
chr1_190053747_190054064	-6.61745	3.64949	9.02941	0.0183969	0.362739
chr6_10694548_10695720	-0.507778	5.49761	7.78152	0.0183999	0.362739
chr7_38385100_38385441	-0.409408	5.74893	7.7706	0.018463	0.362739
chr1_65774987_65775969	-0.625144	5.06641	7.76984	0.0184674	0.362739
chr3_38537492_38538289	-0.514589	5.46808	7.76981	0.0184676	0.362739
chr16_87772348_87772893	6.68194	3.71185	9.00509	0.0185064	0.362739
chr9_68704689_68704927	2.54425	4.74769	7.76296	0.0185073	0.362739
chr11_82406601_82407266	-0.452446	6.33861	7.76102	0.0185186	0.362739
chr10_129743598_129744115	-0.615728	4.93418	7.75916	0.0185294	0.362739
chr2_187454262_187455253	-0.553507	5.90781	7.75821	0.018535	0.362739
chr21_10799816_10800019	2.38783	5.63056	7.75716	0.0185411	0.362739
chr5_159392681_159392885	-6.58664	3.63313	8.99124	0.0185691	0.362739
chr16_67194614_67195060	-6.58707	3.63168	8.98521	0.0185965	0.362739
chr7_38403094_38403279	-2.24056	5.22487	7.74481	0.0186131	0.362739
chr7_123174216_123175532	-0.362868	6.45588	7.73747	0.0186561	0.362739
chr7_34360456_34361311	-0.37508	6.13904	7.72703	0.0187175	0.362739
chr17_64795142_64795537	6.66011	3.6953	8.95753	0.0187229	0.362739
chr3_28282583_28283498	-0.542645	6.575	7.72392	0.0187359	0.362739
chr8_89872204_89873019	-0.378195	6.04881	7.72158	0.0187497	0.362739
chr3_168890951_168891687	-0.444123	5.76672	7.72153	0.0187499	0.362739
chrX_108976238_108976906	-0.537449	5.11511	7.71903	0.0187647	0.362739
chr2_19248512_19249099	-0.919645	4.84153	7.71149	0.0188093	0.362739
chr13_47125669_47125907	-6.66137	3.67681	8.9346	0.0188285	0.362739
chr9_67320439_67320925	0.853458	8.67894	7.70614	0.0188411	0.362739
chr7_27386355_27387107	-0.440425	5.64888	7.70411	0.0188532	0.362739
chr11_112829447_112829650	-6.59661	3.63478	8.92627	0.018867	0.362739
chr8_6658300_6658532	-6.57717	3.62995	8.91889	0.0189012	0.362739
chr4_68566376_68567466	-0.604587	6.34972	7.69362	0.0189156	0.362739
chr6_167412494_167413273	-0.520634	5.27769	7.69043	0.0189346	0.362739
chr12_117580739_117581271	-0.723086	4.98033	7.68924	0.0189417	0.362739
chr3_140947335_140947607	-6.56938	3.62091	8.90927	0.018946	0.362739
chr7_130080506_130081380	-0.553667	5.49795	7.68575	0.0189626	0.362739
chr2_180438815_180439772	-0.643098	5.39694	7.68565	0.0189632	0.362739
chr7_131376734_131377121	-6.58794	3.62776	8.89242	0.0190247	0.362739
chr7_89874149_89875031	-0.552607	6.14387	7.67401	0.019033	0.362739
chr20_57425604_57426041	6.77307	3.76492	8.88547	0.0190572	0.362739
chr7_124559660_124560466	-0.466185	5.75714	7.66759	0.0190717	0.362739
chrX_134048820_134049699	-0.790351	4.87605	7.66606	0.0190809	0.362739
chr7_145715982_145716664	-0.638079	5.11885	7.66349	0.0190964	0.362739
chr20_49928429_49928859	6.64429	3.68145	8.87237	0.0191188	0.362739
chr14_103987241_103987835	0.713531	4.99792	7.65496	0.019148	0.362739
chr5_111108270_111108574	-6.56486	3.61721	8.8654	0.0191517	0.362739
chr1_107029733_107030112	6.63429	3.67729	8.86046	0.019175	0.362739
chr10_91226406_91226964	-0.616665	5.80466	7.64901	0.019184	0.362739
chr19_12900604_12901225	6.63204	3.67321	8.85561	0.019198	0.362739
chr12_132072868_132073281	3.10443	4.52473	7.64447	0.0192116	0.362739
chr8_99057283_99058785	-0.447442	5.74612	7.86902	0.0192152	0.362739
chr4_177116368_177117094	-0.548822	5.42323	7.6401	0.0192382	0.362739
chr6_121655478_121656355	-0.463611	6.20394	7.63873	0.0192465	0.362739
chr4_9153972_9155349	-0.361956	6.84167	7.6363	0.0192613	0.362739
chr1_112518986_112519805	0.430781	5.64739	8.26012	0.0192694	0.362739
chr15_25773260_25773578	6.64652	3.68549	8.84016	0.0192713	0.362739
chr5_148066935_148067369	-0.73633	5.42571	7.63424	0.0192739	0.362739
chr4_13485295_13486770	-0.450866	5.58678	9.11467	0.0192796	0.362739
chr7_12566652_12566839	-6.56201	3.61026	8.83472	0.0192972	0.362739
chrUn_gl000225_117388_117935	3.37657	7.78879	7.6282	0.0193108	0.362739
chrX_49822021_49822311	6.63438	3.68173	8.83045	0.0193176	0.362739
chr1_249239892_249240603	0.70695	5.48382	7.6256	0.0193267	0.362739
chr5_112073258_112074188	-0.633454	5.23216	7.61909	0.0193666	0.362739
chr3_111793623_111794356	0.486856	5.87525	7.61159	0.0194127	0.362739
chr17_58821019_58821959	0.486424	6.24501	7.60416	0.0194585	0.362739
chr2_32581628_32582908	-0.522959	5.37879	7.60206	0.0194715	0.362739
chr4_79046909_79047455	-0.602461	5.14648	7.60158	0.0194745	0.362739
chr1_114417067_114417692	-0.391467	6.07579	7.60087	0.0194789	0.362739
chr16_9184943_9185961	-0.350531	6.24643	7.60045	0.0194815	0.362739
chr5_153900604_153900950	-6.58242	3.63338	8.79453	0.0194901	0.362739
chr9_88741992_88742682	-0.554296	5.80249	7.59681	0.019504	0.362739
chr1_247267238_247268014	-0.497076	5.48442	7.59559	0.0195115	0.362739
chr10_111682890_111683466	-0.725195	5.06283	7.59457	0.0195178	0.362739
chr11_12131595_12132672	-0.534934	5.39255	7.59018	0.0195451	0.362739
chr17_60186888_60187133	-2.3794	5.36441	7.58884	0.0195534	0.362739
chr5_80887387_80888449	-0.800598	4.76037	7.58451	0.0195803	0.362739
chr4_110480849_110482265	-0.589165	5.15212	7.58276	0.0195912	0.362739
chr14_103243780_103244021	6.62461	3.66617	8.76993	0.0196094	0.362739
chrX_14891099_14892020	-0.436844	6.56942	7.57709	0.0196265	0.362739
chr7_85324802_85325325	0.618286	5.3556	7.57542	0.0196369	0.362739
chr6_135375446_135376466	-0.503695	5.56753	7.57489	0.0196403	0.362739
chr10_37578929_37579346	6.61937	3.6623	8.75917	0.0196618	0.362739
chr7_35547942_35548566	-6.54343	3.60367	8.75615	0.0196765	0.362739
chrX_100662599_100663692	-0.418728	5.90738	7.56821	0.019682	0.362739
chr1_100202657_100202813	-6.55794	3.60499	8.75012	0.019706	0.362739
chr5_111496149_111496985	-0.44839	5.44241	9.02776	0.0197264	0.362739
chrUn_gl000220_149799_151030	3.56383	8.78784	7.55556	0.0197613	0.362739
chr2_202645162_202646296	-0.456115	5.60141	7.57247	0.0197688	0.362739
chr7_35956664_35956858	-6.53547	3.59438	8.73705	0.0197702	0.362739
chr9_113189853_113190057	-6.5534	3.60394	8.72824	0.0198136	0.362739
chr8_43764358_43764541	6.61766	3.66118	8.72613	0.019824	0.362739
chr3_27984513_27984901	-0.474459	5.29178	7.88091	0.0198243	0.362739
chr9_77702738_77703717	-0.514719	5.32589	7.7166	0.0198243	0.362739
chr6_101562614_101562789	-6.55418	3.60098	8.72459	0.0198316	0.362739
chr6_153071932_153072124	-6.53838	3.60146	8.72361	0.0198364	0.362739
chr12_74432885_74433233	-0.423667	5.83681	7.54192	0.0198474	0.362739
chr21_10819359_10820102	1.0797	7.13741	7.53796	0.0198724	0.362739
chr3_64229940_64230513	-0.376935	7.48604	7.53466	0.0198934	0.362739
chrX_139173280_139174156	-0.994071	4.68801	7.53425	0.0198959	0.362739
chrY_28799709_28800278	1.86089	5.61903	7.5342	0.0198962	0.362739
chr4_174415240_174415969	-0.500546	5.99462	7.5329	0.0199045	0.362739
chr6_10521293_10521994	-0.638014	5.30875	7.52717	0.0199409	0.362739
chrUn_gl000225_137648_137890	2.97283	6.00977	7.52607	0.0199479	0.362739
chr1_176849886_176850545	-0.521763	5.68983	7.52536	0.0199524	0.362739
chr9_81848420_81848756	-6.53421	3.59618	8.69696	0.0199686	0.362739
chr10_52070583_52070848	-6.52609	3.58968	8.69145	0.0199961	0.362739
chr7_83730259_83730438	-2.60955	5.00012	7.50948	0.0200538	0.362739
chr5_115176979_115178381	-0.447829	5.54532	7.50877	0.0200583	0.362739
chr3_37636654_37637164	-0.859988	5.03805	7.50646	0.0200731	0.362739
chr8_105349194_105349753	1.24917	5.10026	7.50548	0.0200794	0.362739
chr12_122710113_122711135	-0.508285	5.89567	7.50528	0.0200807	0.362739
chr8_125150376_125151145	-0.473025	5.59532	7.50468	0.0200845	0.362739
chr6_139571648_139571975	-6.52749	3.58499	8.6728	0.0200894	0.362739
chr4_122865237_122865395	-6.53607	3.58998	8.67008	0.0201031	0.362739
chr3_156398810_156399157	-2.05329	4.894	7.50082	0.0201093	0.362739
chr12_56210880_56212119	-0.361448	6.12862	7.73982	0.0201104	0.362739
chr21_21760821_21761102	6.61108	3.65374	8.66271	0.0201401	0.362739
chr9_21334880_21335629	-0.532449	5.20093	7.49188	0.0201668	0.362739
chr22_16199855_16200612	0.389667	5.79079	7.74096	0.0201731	0.362739
chr12_53472685_53473693	0.545051	6.33549	7.48602	0.0202046	0.362739
chr20_53530334_53531086	1.85911	5.49294	7.47892	0.0202505	0.362739
chr2_33895683_33895956	-0.411668	5.61839	8.48389	0.020251	0.362739
chr2_54950268_54951041	-0.330605	6.5095	7.47862	0.0202525	0.362739
chr9_2014702_2015610	-0.383767	5.97869	8.24903	0.0202561	0.362739
chr1_201377413_201377724	-6.51853	3.57867	8.63564	0.0202771	0.362739
chr1_210048964_210049153	-6.54181	3.58996	8.63107	0.0203003	0.362739
chr1_197454527_197455463	-0.429891	6.65967	7.47077	0.0203034	0.362739
chr7_21806892_21807236	-0.444507	5.47448	8.10207	0.0203097	0.362739
chr14_19676299_19676697	6.59692	3.65249	8.62717	0.0203201	0.362739
chr11_115086479_115086812	-6.52716	3.58368	8.61422	0.0203862	0.362739
chr1_177225241_177226016	-0.42578	6.40948	7.45369	0.0204148	0.362739
chrUn_gl000243_20285_21645	1.52842	5.65749	7.45344	0.0204164	0.362739
chr17_21030045_21030789	0.758958	4.81604	7.44724	0.020457	0.362739
chr12_72332467_72333044	-0.52874	5.40284	7.43978	0.020506	0.362739
chr3_23136406_23136892	-0.462548	5.68896	7.43519	0.0205363	0.362739
chr6_120699625_120700224	-0.490457	5.41329	7.43013	0.0205696	0.362739
chr12_124923365_124923954	6.58013	3.63644	8.56659	0.0206317	0.362739
chr11_105947419_105948791	-0.583355	6.30095	7.42018	0.0206354	0.362739
chr18_77451506_77452052	6.57684	3.63735	8.55488	0.0206927	0.362739
chr8_139948247_139948884	-0.651247	5.30998	7.40752	0.0207195	0.362739
chr2_7534408_7534714	-6.49555	3.56508	8.5496	0.0207202	0.362739
chr7_143018539_143019256	-6.49555	3.56508	8.5496	0.0207202	0.362739
chr16_70414474_70415779	0.554745	5.06522	7.40703	0.0207228	0.362739
chr3_67998245_67999059	-0.607889	5.37719	7.40681	0.0207243	0.362739
chrX_134137947_134138710	-0.764104	4.8784	7.40515	0.0207353	0.362739
chr15_51914131_51915446	0.488921	5.20237	7.5546	0.0207479	0.362739
chr5_57158198_57159013	-0.552803	5.38517	7.40139	0.0207604	0.362739
chr7_87856198_87856844	-0.457047	6.65217	7.40061	0.0207656	0.362739
chr17_58103285_58104369	0.780303	6.93311	7.40015	0.0207687	0.362739
chr17_59527460_59528271	0.446548	8.03143	7.39898	0.0207765	0.362739
chr11_125985910_125986150	-6.58061	3.61087	8.52899	0.0208282	0.362739
chr5_99870671_99871674	-0.606274	5.38127	7.377	0.0209239	0.362739
chr6_105582931_105583255	-6.49212	3.5593	8.50383	0.020961	0.362739
chr20_52998979_52999681	2.1614	5.68118	7.37098	0.0209646	0.362739
chr2_3522176_3523537	-0.44434	6.17572	7.3688	0.0209793	0.362739
chr7_86781097_86782540	-0.508604	6.94669	7.36375	0.0210135	0.362739
chr20_58712690_58713027	6.56085	3.61854	8.4858	0.0210568	0.362739
chr12_100557465_100558114	-0.471202	5.53794	7.35692	0.0210598	0.362739
chr7_149757725_149758359	6.5572	3.61634	8.48007	0.0210874	0.362739
chr6_120041383_120041592	-6.51503	3.57092	8.47982	0.0210887	0.362739
chr11_31530758_31531791	-0.460928	6.09221	7.34871	0.0211156	0.362739
chr2_13823009_13823351	-6.4877	3.55677	8.46588	0.0211634	0.362739
chr9_66454766_66456027	2.65058	4.93758	7.34151	0.0211648	0.362739
chr17_60188323_60190860	0.692288	5.70209	7.3413	0.0211662	0.362739
chr2_175112707_175113762	-0.479557	5.502	9.27038	0.0211696	0.362739
chr2_106266920_106267463	-6.50393	3.57221	8.46005	0.0211947	0.362739
chr8_8091346_8091596	-6.50225	3.56134	8.4597	0.0211966	0.362739
chr11_82782537_82783390	-0.400611	6.32691	7.33522	0.0212078	0.362739
chr1_215125895_215126392	-6.53289	3.58143	8.45677	0.0212123	0.362739
chrUn_gl000216_164367_164550	2.26127	7.21606	7.3339	0.0212169	0.362739
chr7_155121322_155121575	6.5494	3.61388	8.44916	0.0212533	0.362739
chr15_44069197_44069547	-5.31554	2.78656	8.44419	0.0212801	0.362739
chr2_238200019_238200367	-5.31554	2.78656	8.44419	0.0212801	0.362739
chr9_4073340_4073701	-6.52123	3.56932	8.43874	0.0213096	0.362739
chr11_134509722_134510173	-0.665689	4.99693	7.31786	0.0213271	0.362739
chrY_13833006_13833600	1.59938	6.27859	7.31279	0.0213621	0.362739
chr2_204443668_204444380	-0.513022	5.71763	7.31192	0.0213681	0.362739
chr6_291606_292972	-0.545111	5.56146	7.31192	0.0213681	0.362739
chr1_111090932_111091297	-6.49313	3.55491	8.4205	0.0214086	0.362739
chr7_84815571_84816534	-0.592796	5.73676	7.30438	0.0214204	0.362739
chr12_72140694_72141254	0.791992	4.80494	7.30389	0.0214237	0.362739
chr1_173043414_173043908	-6.48802	3.55366	8.41765	0.0214242	0.362739
chr7_128071314_128071582	6.54628	3.60822	8.41319	0.0214485	0.362739
chr5_112849127_112850010	-0.43845	5.52874	10.5568	0.0214521	0.362739
chr1_169454575_169455609	-0.448193	6.64947	7.29647	0.0214752	0.362739
chr2_136633215_136634384	-0.456981	5.73805	7.28905	0.0215269	0.362739
chr21_10797772_10798160	2.0915	5.87761	7.2854	0.0215524	0.362739
chr3_3242468_3242764	6.54346	3.60539	8.39095	0.0215703	0.362739
chr1_159869786_159870679	-0.47798	5.73927	7.28075	0.0215849	0.362739
chr15_50440614_50440812	-2.27162	5.00093	7.27687	0.0216121	0.362739
chr2_48667407_48668388	-0.385213	6.37072	7.27682	0.0216124	0.362739
chr7_150777764_150778119	-6.45987	3.53742	8.37663	0.0216492	0.362739
chr1_168318210_168318614	0.81173	5.48804	7.27157	0.0216493	0.362739
chr6_11537498_11538414	-0.737543	5.06821	7.27114	0.0216523	0.362739
chr17_122777_123334	6.55851	3.62116	8.37384	0.0216647	0.362739
chr1_196796875_196797236	6.53894	3.60304	8.3702	0.0216848	0.362739
chr1_196879467_196879707	-2.60404	4.7078	7.25614	0.0217579	0.362739
chr8_55471302_55471812	-0.632263	5.21661	7.25436	0.0217705	0.362739
chr17_22258077_22258711	0.949691	7.60985	7.25433	0.0217707	0.362739
chr11_51588343_51589142	0.929835	8.6666	7.25129	0.0217922	0.362739
chr10_42544482_42545276	0.911585	6.92548	7.25024	0.0217997	0.362739
chr20_52537547_52538446	1.69044	5.69339	7.24956	0.0218045	0.362739
chr6_126497527_126497699	-6.4654	3.53657	8.34633	0.0218175	0.362739
chr4_130383036_130383252	-5.36547	2.81084	8.34541	0.0218226	0.362739
chr7_98408738_98409222	6.54128	3.61103	8.34395	0.0218307	0.362739
chr2_92135576_92135867	6.53758	3.59923	8.34379	0.0218316	0.362739
chr15_98985555_98985978	-6.45901	3.53773	8.34233	0.0218398	0.362739
chr4_146540059_146541110	-0.449966	5.72301	7.24312	0.0218501	0.362739
chr2_209473075_209474202	-0.931314	4.75406	7.23563	0.0219034	0.362739
chr8_127445927_127446230	-6.53827	3.57736	8.32522	0.0219356	0.362739
chr14_79256698_79256994	-5.39334	2.8346	8.31359	0.0220011	0.362739
chr1_170898802_170899374	-0.483199	5.70171	7.21955	0.0220183	0.362739
chr1_165078315_165078603	-6.47243	3.54893	8.30389	0.0220559	0.362739
chr14_51553570_51553961	-6.44101	3.52439	8.30315	0.0220601	0.362739
chr4_103953656_103954094	-6.44101	3.52439	8.30315	0.0220601	0.362739
chr5_38598746_38599495	6.52147	3.58989	8.30297	0.0220611	0.362739
chr2_179344871_179345864	-0.38998	5.97165	7.21245	0.0220693	0.362739
chr2_12204265_12204573	-6.46033	3.53524	8.30109	0.0220717	0.362739
chr8_128871710_128872615	-0.623054	6.78828	7.20563	0.0221183	0.362739
chr7_101448145_101448763	6.53867	3.59978	8.28784	0.0221469	0.362739
chr8_91131237_91131572	-0.698426	5.48619	7.2015	0.0221481	0.362739
chr10_108325226_108325839	0.654886	4.94974	7.19658	0.0221837	0.362739
chr8_91341163_91341476	-0.51181	5.97314	7.19551	0.0221914	0.362739
chr4_3294198_3294825	-6.50441	3.55346	8.27902	0.0221971	0.362739
chr3_90340052_90340233	6.53472	3.59855	8.27623	0.022213	0.362739
chr2_18229270_18229657	-0.569597	5.05603	7.90664	0.022251	0.362739
chr20_45786376_45788275	0.606664	5.50251	7.187	0.0222531	0.362739
chr3_12176445_12176799	-6.4562	3.52994	8.26804	0.0222599	0.362739
chrX_128249185_128249375	-6.4562	3.52994	8.26804	0.0222599	0.362739
chr3_25705296_25706970	-0.404537	5.91579	10.1731	0.0222642	0.362739
chr20_62477715_62478125	6.52386	3.59439	8.26472	0.0222789	0.362739
chr11_20418898_20419058	-6.46667	3.5324	8.26207	0.022294	0.362739
chr6_153303990_153305438	-0.678287	6.39588	7.17791	0.0223192	0.362739
chr8_9791172_9791565	-0.722678	4.83775	7.17662	0.0223286	0.362739
chr2_159312832_159313667	-0.403616	5.73205	8.09685	0.0223312	0.362739
chr2_64115929_64116228	-6.45184	3.52888	8.25181	0.022353	0.362739
chr17_55037952_55038570	-0.457632	5.81545	7.17274	0.0223569	0.362739
chr14_53683825_53684754	-0.534914	6.42102	7.1727	0.0223572	0.362739
chr7_25896468_25897202	-0.412308	5.97255	7.17153	0.0223657	0.362739
chr1_93544481_93544881	-5.44072	2.85816	8.24803	0.0223748	0.362739
chr8_927993_928291	6.50057	3.57592	8.24636	0.0223844	0.362739
chr10_134350548_134351368	-0.559427	5.8419	7.1648	0.0224149	0.362739
chr8_128608406_128608929	-0.55751	5.33676	7.16443	0.0224176	0.362739
chrUn_gl000228_27172_27758	1.63719	5.66944	7.16319	0.0224267	0.362739
chr3_195688824_195689181	6.56861	3.61716	8.23546	0.0224474	0.362739
chr17_56977617_56978309	1.68077	5.06303	7.15917	0.0224562	0.362739
chr7_72288331_72288567	-5.45945	2.86813	8.22955	0.0224816	0.362739
chr7_90557831_90558677	-0.397979	7.10365	7.15113	0.0225153	0.362739
chr2_71453913_71454827	-0.393008	5.88159	7.1511	0.0225155	0.362739
chr14_35024683_35026021	-0.655519	5.33506	7.14948	0.0225275	0.362739
chr1_152415142_152415437	-6.42298	3.50771	8.22063	0.0225334	0.362739
chr4_75172438_75172655	-6.42298	3.50771	8.22063	0.0225334	0.362739
chr20_26077926_26078345	6.55325	3.60636	8.21616	0.0225594	0.362739
chr8_82002817_82003273	-2.09873	4.74503	7.14374	0.0225698	0.362739
chr9_137248631_137249072	-6.44817	3.52131	8.21048	0.0225925	0.362739
chr1_183912154_183912424	-6.41888	3.50332	8.20462	0.0226267	0.362739
chr3_171752755_171753213	-6.41888	3.50332	8.20462	0.0226267	0.362739
chr17_7218353_7218892	-5.42377	2.83673	8.20376	0.0226317	0.362739
chr18_73628163_73628514	-5.47734	2.8827	8.19904	0.0226593	0.362739
chr18_71707885_71708383	-6.43325	3.51245	8.19535	0.022681	0.362739
chr8_87353952_87355489	-0.339054	6.67374	7.12812	0.0226855	0.362739
chr15_51628152_51628442	-6.43855	3.51481	8.19294	0.0226951	0.362739
chr8_129756637_129757493	-0.478313	5.47073	7.12638	0.0226985	0.362739
chr7_144532361_144533471	-0.427754	6.3075	7.12438	0.0227133	0.362739
chr12_60429833_60430218	-5.47795	2.87806	8.18906	0.0227179	0.362739
chrX_137968969_137969229	-5.47795	2.87806	8.18906	0.0227179	0.362739
chr12_67555219_67555562	-6.4373	3.51681	8.18516	0.0227408	0.362739
chr5_170288718_170289803	-0.606706	5.6721	7.12053	0.0227419	0.362739
chrX_150250609_150251315	-0.506779	5.24357	7.1175	0.0227646	0.362739
chr7_25901788_25902489	-0.426551	7.03031	7.11631	0.0227734	0.362739
chr1_107930319_107930608	6.50706	3.57653	8.17896	0.0227773	0.362739
chr7_124569528_124570267	-0.51507	6.98732	7.11557	0.022779	0.362739
chr20_60183192_60183651	-6.44402	3.51592	8.1782	0.0227818	0.362739
chr7_150813266_150813495	-6.40902	3.49993	8.17805	0.0227827	0.362739
chr6_142644274_142645108	-0.553764	5.48418	7.11471	0.0227854	0.362739
chr4_104364601_104364806	-6.40454	3.49405	8.17446	0.0228039	0.362739
chr1_173445844_173447329	-0.785594	6.43642	7.10502	0.0228579	0.362739
chr15_75591371_75591837	0.703686	5.0363	7.10216	0.0228794	0.362739
chr12_67988921_67989428	-6.39786	3.49544	8.15924	0.0228939	0.362739
chr10_112678252_112679622	-0.33888	6.31089	7.09868	0.0229055	0.362739
chr9_30065868_30066219	-0.465703	5.64001	7.09868	0.0229055	0.362739
chrX_109195242_109195585	-6.42931	3.50913	8.15575	0.0229147	0.362739
chr20_31240683_31240876	-5.47836	2.87578	8.15444	0.0229224	0.362739
chr7_70321807_70322340	6.56193	3.60925	8.15388	0.0229258	0.362739
chr2_121834604_121834808	-6.41418	3.50023	8.15124	0.0229415	0.362739
chr4_170232939_170233086	-6.41418	3.50023	8.15124	0.0229415	0.362739
chr2_18585880_18586244	-6.39949	3.48997	8.15007	0.0229484	0.362739
chr9_67790933_67792004	0.941406	5.02699	7.09261	0.0229512	0.362739
chr10_118534320_118534673	-5.50358	2.90038	8.14556	0.0229753	0.362739
chr12_67877445_67878142	-0.518203	5.86881	7.08644	0.0229977	0.362739
chr13_74864567_74864877	-0.555682	5.79454	7.08344	0.0230204	0.362739
chr6_3819524_3819881	-6.3844	3.48248	8.13574	0.0230339	0.362739
chr19_50640358_50640614	6.53472	3.59352	8.1311	0.0230617	0.362739
chr1_108998939_108999600	-6.38495	3.48062	8.127	0.0230863	0.362739
chr7_102232893_102233504	-0.408297	7.27045	7.07357	0.0230952	0.362739
chr3_140974639_140975060	-6.37963	3.47986	8.1242	0.0231031	0.362739
chr7_66309481_66310119	0.525103	5.19176	7.07169	0.0231095	0.362739
chr6_114379646_114380081	-5.48646	2.88382	8.11825	0.0231388	0.362739
chrX_151849570_151849761	-6.38805	3.48878	8.11612	0.0231517	0.362739
chr19_49628555_49628942	6.47809	3.55692	8.11316	0.0231695	0.362739
chr9_114393068_114394142	-0.493398	5.69834	7.06289	0.0231765	0.362739
chr20_25310792_25311109	-5.46105	2.85464	8.1113	0.0231807	0.362739
chrX_8434654_8435323	6.51934	3.59088	8.10965	0.0231906	0.362739
chr2_207188207_207188538	-6.40034	3.48911	8.10781	0.0232018	0.362739
chr5_125758702_125759525	-0.421978	5.43046	7.27922	0.023221	0.362739
chr6_143046700_143047268	-5.48814	2.87529	8.10421	0.0232235	0.362739
chr9_139159128_139159471	-6.40563	3.49038	8.10098	0.023243	0.362739
chr20_49094876_49095217	-6.37541	3.47537	8.09086	0.0233043	0.362739
chr2_225866814_225867214	-5.52257	2.90342	8.08992	0.02331	0.362739
chr2_92295935_92298138	1.57118	7.59321	7.0443	0.0233188	0.362739
chr7_86948123_86948906	-0.638301	5.13986	7.04318	0.0233273	0.362739
chr12_131130601_131130977	1.39187	7.45419	7.03728	0.0233727	0.362739
chr12_133199456_133200250	-6.37561	3.47198	8.07882	0.0233776	0.362739
chr4_548860_549332	6.4813	3.55882	8.07838	0.0233802	0.362739
[truncated: 34,493 more rows]
