# Supplementary material for: G4-DNA formation and chromatin remodelling are interdependent in human cells
Source: Chem Sci. 2023 Jun 27;14(28):7681–7. doi: 10.1039/d3sc02533k (PMC10355101; doi:10.1039/d3sc02533k)
Supplement: SC-014-D3SC02533K-s003 [file SC-014-D3SC02533K-s003.xlsx]

## Sheet: GQC-05
GeneID	hgnc_symbol	logFC	logCPM	F	PValue	FDR
2274	FHL2	1.1889	3.62704	45.9774	0.000385806	0.99554
7791	ZYX	0.466104	7.17991	29.0284	0.0013792	0.99554
8322	FZD4	-0.637225	4.33911	21.9083	0.0028831	0.99554
4016	LOXL1	0.576692	4.26393	21.281	0.00310449	0.99554
6324	SCN1B	0.652398	4.11333	21.1028	0.00317145	0.99554
100506696	PCAT6	1.24171	1.33444	19.874	0.00368899	0.99554
23612	PHLDA3	0.553835	5.71027	19.5848	0.00382668	0.99554
85444	LRRCC1	-0.549231	4.66587	19.5503	0.00384355	0.99554
89846	FGD3	0.880033	4.69669	19.1629	0.00404	0.99554
5476	CTSA	0.364645	7.5336	16.9704	0.00544189	0.99554
79006	METRN	0.437559	4.96235	16.8716	0.00551922	0.99554
58480	RHOU	0.507587	5.6791	16.6897	0.00566539	0.99554
64101	LRRC4	1.3411	0.821413	16.627	0.00571693	0.99554
10437	IFI30	0.372034	5.43428	16.2644	0.00602754	0.99554
5328	PLAU	0.783676	3.21321	16.1271	0.00615103	0.99554
114904	C1QTNF6	0.688535	5.51524	16.0623	0.00621038	0.99554
5888	RAD51	-0.451071	4.68151	15.917	0.00634636	0.99554
6382	SDC1	0.360012	7.13298	15.6456	0.00661108	0.99554
283209	PGM2L1	0.561236	5.5282	15.508	0.00675083	0.99554
54541	DDIT4	0.355219	5.71587	15.3233	0.00694461	0.99554
4627	MYH9	0.31958	9.75486	15.2779	0.00699335	0.99554
6097	RORC	-1.70643	-0.100562	15.2503	0.0070232	0.99554
102723465	NA	1.14668	2.24749	14.9919	0.007311	0.99554
3148	HMGB2	-0.321464	8.40019	14.9366	0.00737466	0.99554
11043	MID2	0.325094	6.67214	14.9245	0.00738868	0.99554
91039	DPP9	0.366879	6.07675	14.8887	0.00743036	0.99554
6909	TBX2	0.327184	7.75952	14.8872	0.00743209	0.99554
8000	PSCA	0.992594	3.98495	14.7921	0.00754439	0.99554
1026	CDKN1A	0.705565	7.76378	14.7792	0.00755971	0.99554
102724615	NA	0.605355	3.43491	14.7634	0.00757867	0.99554
1265	CNN2	0.355511	6.72847	14.6878	0.00767009	0.99554
115752	DIS3L	-0.405734	5.04649	14.6148	0.00775962	0.99554
9052	GPRC5A	0.742133	7.79814	14.604	0.00777306	0.99554
58526	MID1IP1	0.335074	5.80043	14.4818	0.00792652	0.99554
7113	TMPRSS2	0.661551	5.72976	14.3506	0.00809579	0.99554
6492	SIM1	-0.851146	3.20353	14.0659	0.00847987	0.99554
3914	LAMB3	0.689292	3.53843	13.8034	0.00885548	0.99554
55093	NTAQ1	-0.429376	4.76465	13.7813	0.00888806	0.99554
24	ABCA4	1.15123	2.28321	13.7591	0.008921	0.99554
26577	PCOLCE2	-1.33215	0.646939	13.6641	0.00906364	0.99554
11064	CNTRL	-0.556165	4.26489	13.6296	0.00911621	0.99554
101929296	NA	-1.05164	1.60066	13.3338	0.00958396	0.99554
144571	A2M-AS1	1.01544	1.43815	13.2765	0.00967813	0.99554
56155	TEX14	-0.650436	4.85885	13.2041	0.009799	0.99554
10370	CITED2	0.293715	6.77159	13.1893	0.00982394	0.99554
135886	TMEM270	-5.28942	-1.57219	15.2441	0.00982672	0.99554
10125	RASGRP1	0.479195	5.2238	13.1339	0.00991809	0.99554
10449	ACAA2	0.314337	7.49984	13.1181	0.00994521	0.99554
19	ABCA1	0.484981	4.97381	13.0481	0.0100663	0.99554
2355	FOSL2	0.341098	6.88621	12.9921	0.0101644	0.99554
10608	MXD4	0.324752	5.72614	12.9315	0.0102722	0.99554
305	NA	2.01315	-0.7366	12.8363	0.0104445	0.99554
266722	HS6ST3	0.366549	5.38926	12.7529	0.0105986	0.99554
100506190	NA	0.543475	4.86904	12.6284	0.0108343	0.99554
347	APOD	0.510662	6.88294	12.5867	0.0109148	0.99554
129303	TMEM150A	0.502624	4.13084	12.4438	0.0111966	0.99554
5357	PLS1	0.306535	6.30319	12.3366	0.0114144	0.99554
8412	BCAR3	0.451771	4.50696	12.2739	0.0115444	0.99554
51474	LIMA1	0.599093	6.15513	12.179	0.0117449	0.99554
10908	PNPLA6	0.363526	5.22907	12.1686	0.0117671	0.99554
114787	GPRIN1	-0.371176	5.03299	12.1585	0.0117889	0.99554
23135	KDM6B	0.304302	5.92241	12.0556	0.0120125	0.99554
100130449	GPC1-AS1	0.600654	4.5821	12.0504	0.0120239	0.99554
54828	BCAS3	0.319834	9.85983	12.0337	0.0120609	0.99554
54908	SPDL1	-0.311164	5.64305	11.9628	0.012219	0.99554
84909	AOPEP	0.437656	4.8721	11.8916	0.0123808	0.99554
64787	EPS8L2	0.272824	6.96029	11.7831	0.0126325	0.99554
7422	VEGFA	0.437122	5.65554	11.7421	0.0127295	0.99554
79896	THNSL1	-0.339041	5.35626	11.6911	0.0128514	0.99554
195828	ZNF367	-0.329171	5.34914	11.6829	0.0128712	0.99554
26010	SPATS2L	0.443784	6.67816	11.6371	0.0129821	0.99554
2710	GK	-0.824535	2.11686	11.6329	0.0129923	0.99554
8399	PLA2G10	0.864748	1.60641	11.6241	0.0130139	0.99554
7272	TTK	-0.287674	6.04023	11.581	0.01312	0.99554
84515	MCM8	-0.36394	5.16389	11.5632	0.0131641	0.99554
10819	NA	0.663356	2.84139	11.5416	0.0132177	0.99554
440253	NA	-1.81887	-0.495615	11.5106	0.0132955	0.99554
100037417	DDT	-1.96516	-0.835775	11.4978	0.0133278	0.99554
100037417	DDTL	-1.96516	-0.835775	11.4978	0.0133278	0.99554
9780	PIEZO1	0.2895	9.28589	11.432	0.0134953	0.99554
5557	PRIM1	-0.317896	5.54304	11.3931	0.0135955	0.99554
100996433	NA	3.29718	-1.41557	11.3554	0.0136938	0.99554
6303	SAT1	0.664889	6.19355	11.306	0.0138237	0.99554
387496	RASL11A	1.42869	1.19819	11.2866	0.0138753	0.99554
645553	IGFL2-AS1	2.21864	-0.607139	11.2223	0.0140479	0.99554
595	CCND1	0.410637	9.31641	11.1739	0.0141797	0.99554
8912	CACNA1H	0.360756	6.66025	11.1702	0.0141898	0.99554
11130	ZWINT	-0.269236	7.23459	11.1373	0.0142803	0.99554
10150	MBNL2	0.354426	5.96432	11.1249	0.0143148	0.99554
100129482	ZNF37BP	-0.375507	4.75283	11.1243	0.0143163	0.99554
92747	BPIFB1	1.01325	3.37994	11.028	0.0145868	0.99554
54751	FBLIM1	0.52683	4.75392	10.9891	0.0146981	0.99554
80303	EFHD1	0.307258	6.55491	10.9541	0.0147991	0.99554
57103	TIGAR	0.364298	5.72456	10.9059	0.0149395	0.99554
83667	SESN2	0.353266	4.8315	10.8104	0.0152235	0.99554
25904	CNOT10	-0.322449	5.43306	10.7665	0.0153563	0.99554
7421	VDR	0.458141	4.7716	10.6748	0.0156386	0.99554
91120	ZNF682	-0.81094	2.26383	10.6122	0.0158356	0.99554
3832	KIF11	-0.279394	7.0868	10.5946	0.0158915	0.99554
8871	SYNJ2	0.285797	5.86602	10.5627	0.0159935	0.99554
10541	ANP32B	-0.247981	8.60865	10.4343	0.0164128	0.99554
100506070	NA	-2.5307	-1.15725	10.4253	0.016443	0.99554
7638	ZNF221	-2.5307	-1.15725	10.4253	0.016443	0.99554
56925	LXN	0.639535	8.28238	10.4106	0.0164918	0.99554
79075	DSCC1	-0.322136	5.22622	10.3909	0.0165578	0.99554
6461	SHB	0.44689	5.0978	10.3781	0.0166011	0.99554
10382	TUBB4A	1.19774	0.454193	10.3726	0.0166197	0.99554
100128511	NA	-3.16671	-1.35006	10.3649	0.0166456	0.99554
29903	CCDC106	-0.61304	2.71149	10.2589	0.0170096	0.99554
55503	TRPV6	3.16194	-1.4899	10.2299	0.0171113	0.99554
404093	CUEDC1	0.39145	5.43916	10.2267	0.0171223	0.99554
51347	TAOK3	0.285224	6.51956	10.2149	0.0171639	0.99554
166336	PRICKLE2	0.298755	6.37577	10.1801	0.017287	0.99554
56937	PMEPA1	0.386206	7.60764	10.162	0.0173518	0.99554
9413	FAM189A2	0.451554	4.02549	10.1108	0.0175361	0.99554
9980	DOP1B	0.39988	7.11419	10.1041	0.0175606	0.99554
284379	NA	0.627792	2.96098	10.0876	0.0176204	0.99554
253190	SERHL2	0.649498	2.35492	10.07	0.0176851	0.99554
10403	NDC80	-0.296327	5.42134	9.9803	0.018018	0.99554
8821	INPP4B	0.472308	6.6596	9.94093	0.0181668	0.99554
4594	MMUT	-0.310988	5.51651	9.92738	0.0182184	0.99554
7754	NA	-0.882829	1.46331	9.90212	0.0183151	0.99554
27347	STK39	0.270284	6.0985	9.88972	0.0183628	0.99554
23595	ORC3	-0.301444	5.76284	9.85776	0.0184865	0.99554
81691	REXO5	-0.425641	4.17018	9.79377	0.0187376	0.99554
56243	KIAA1217	0.555843	5.00038	9.7918	0.0187454	0.99554
223075	ITPRID1	-1.15203	1.06176	9.77	0.018832	0.99554
22822	PHLDA1	0.443102	5.22991	9.76633	0.0188466	0.99554
340485	ACER2	0.577942	4.2966	9.73795	0.0189603	0.99554
57655	GRAMD1A	0.284898	5.70142	9.72269	0.0190218	0.99554
126536	LINC00661	-2.88546	-0.935416	9.7074	0.0190836	0.99554
157777	MCMDC2	-1.2627	0.464886	9.70364	0.0190989	0.99554
3925	STMN1	-0.283383	7.839	9.68186	0.0191876	0.99554
317	APAF1	-0.358248	4.8904	9.64471	0.0193402	0.99554
55215	FANCI	-0.253338	7.77579	9.6445	0.019341	0.99554
3174	HNF4G	2.23642	-0.830567	9.63771	0.0193691	0.99554
3728	JUP	0.314756	9.31604	9.60861	0.0194899	0.99554
348654	GEN1	-0.302041	6.08551	9.59351	0.019553	0.99554
4035	LRP1	-0.507106	3.36868	9.54652	0.0197511	0.99554
645460	NA	-0.493892	3.45168	9.47911	0.02004	0.99554
3625	INHBB	0.613	7.22506	9.45054	0.0201641	0.99554
4001	LMNB1	-0.251085	7.95665	9.38992	0.0204309	0.99554
149465	CFAP57	2.45727	-1.34521	9.38094	0.0204708	0.99554
7124	TNF	3.52823	-1.27857	9.37539	0.0204955	0.99554
57463	AMIGO1	0.480547	3.53685	9.36756	0.0205304	0.99554
9379	NRXN2	-1.88454	-0.884384	9.31018	0.0207889	0.99554
5349	FXYD3	0.510285	7.5611	9.3101	0.0207892	0.99554
100287569	LINC00173	-0.944283	0.92769	9.29837	0.0208426	0.99554
85013	TMEM128	-0.374441	4.4217	9.27658	0.0209422	0.99554
4085	MAD2L1	-0.257489	6.13261	9.2717	0.0209646	0.99554
54480	CHPF2	0.325136	5.81698	9.24831	0.0210724	0.99554
219	ALDH1B1	-0.309762	5.06848	9.22177	0.0211956	0.99554
23625	FAM89B	0.316962	5.758	9.15315	0.0215185	0.99554
57447	NDRG2	-0.525653	3.82155	9.13418	0.021609	0.99554
94241	TP53INP1	0.640383	7.03026	9.03564	0.0220869	0.99554
8503	PIK3R3	0.291479	7.42306	8.99392	0.0222934	0.99554
9444	QKI	0.280015	6.90287	8.98611	0.0223324	0.99554
101929580	NA	-0.854368	1.32069	8.9781	0.0223724	0.99554
23178	PASK	-0.317127	5.26184	8.97515	0.0223872	0.99554
5612	THAP12	-0.246791	6.70316	8.92084	0.0226615	0.99554
84959	UBASH3B	1.13251	0.286559	8.90178	0.0227588	0.99554
1903	S1PR3	0.399756	5.72546	8.89012	0.0228186	0.99554
284071	MEIOC	-1.87713	-0.457802	8.87509	0.0228959	0.99554
51065	RPS27L	0.440018	6.2966	8.86772	0.022934	0.99554
1241	LTB4R	-0.390919	5.44678	8.85578	0.0229958	0.99554
283174	NA	-0.835018	1.17359	8.83956	0.0230803	0.99554
81543	LRRC3	-0.658134	2.18446	8.81818	0.0231921	0.99554
78995	HROB	-0.542069	3.32379	8.80277	0.0232732	0.99554
91433	RCCD1	-0.353954	4.90663	8.80085	0.0232833	0.99554
170958	ZNF525	-0.545951	3.59908	8.79485	0.023315	0.99554
84140	FAM161A	-0.509917	3.29742	8.79224	0.0233288	0.99554
5318	PKP2	0.32804	4.79459	8.75977	0.0235014	0.99554
440193	CCDC88C	0.425247	5.71007	8.7391	0.0236121	0.99554
54550	NECAB2	1.2321	-0.12203	8.69745	0.0238374	0.99554
79682	CENPU	-0.407316	5.0141	8.69231	0.0238655	0.99554
200895	DHFR2	-0.633365	3.1198	8.68189	0.0239224	0.99554
102724384	NA	-3.04373	-1.42029	8.62506	0.0242358	0.99554
5889	RAD51C	-0.250676	7.78682	8.60359	0.0243557	0.99554
100652758	NA	-1.51093	-0.0995592	8.59939	0.0243792	0.99554
55320	MIS18BP1	-0.311417	6.82163	8.58429	0.0244641	0.99554
92359	CRB3	0.469748	3.40378	8.56366	0.0245807	0.99554
153478	PLEKHG4B	0.690602	2.07978	8.56044	0.0245989	0.99554
5287	PIK3C2B	0.240901	6.45179	8.56027	0.0245999	0.99554
10906	TRAFD1	0.343178	7.45309	8.54992	0.0246587	0.99554
6491	STIL	-0.337308	5.76456	8.53323	0.024754	0.99554
79598	CEP97	-0.395104	4.06621	8.52705	0.0247894	0.99554
1969	EPHA2	0.576979	5.52855	8.52549	0.0247983	0.99554
10381	TUBB3	0.43578	6.90684	8.51664	0.0248492	0.99554
347902	AMIGO2	-0.307447	5.66532	8.51586	0.0248536	0.99554
2888	GRB14	-0.359841	4.52934	8.51345	0.0248675	0.99554
6857	SYT1	-0.331574	6.70341	8.51246	0.0248732	0.99554
10535	RNASEH2A	-0.272918	5.70948	8.50167	0.0249355	0.99554
6249	CLIP1	0.28505	7.43615	8.49238	0.0249892	0.99554
30832	ZNF354C	-0.634515	2.875	8.49096	0.0249974	0.99554
83715	ESPN	0.289107	5.29576	8.48694	0.0250207	0.99554
54067	NA	-3.04181	-1.42007	8.465	0.0251485	0.99554
84951	TNS4	0.991807	1.92155	8.46438	0.0251521	0.99554
163486	DENND1B	-0.308798	4.96571	8.4513	0.0252287	0.99554
101928045	NA	2.69263	-1.21382	8.44102	0.0252892	0.99554
374393	FAM111B	-0.325356	5.98301	8.42926	0.0253585	0.99554
100506046	NA	-2.04349	-0.788408	8.42398	0.0253897	0.99554
54800	KLHL24	0.483173	4.36652	8.40847	0.0254817	0.99554
1942	EFNA1	0.238555	6.18544	8.40615	0.0254955	0.99554
7008	TEF	-0.380626	4.72049	8.40189	0.0255209	0.99554
4758	NEU1	0.301059	6.59621	8.40043	0.0255296	0.99554
29841	GRHL1	0.260401	5.69852	8.38476	0.0256232	0.99554
6462	SHBG	3.15881	-1.49034	8.37807	0.0256633	0.99554
4088	SMAD3	0.556152	7.15843	8.35982	0.0257731	0.99554
3955	LFNG	0.426408	5.07569	8.35833	0.0257821	0.99554
4952	OCRL	-0.235413	6.60607	8.35221	0.0258192	0.99554
4325	MMP16	-0.386312	6.39321	8.35028	0.0258309	0.99554
2624	GATA2	0.300263	5.97714	8.34906	0.0258382	0.99554
1280	COL2A1	0.757265	1.54167	8.34753	0.0258475	0.99554
79586	CHPF	0.245575	6.38295	8.31346	0.026055	0.99554
148327	CREB3L4	-0.32831	5.51895	8.29617	0.0261612	0.99554
79670	TUT7	0.262182	5.86533	8.28861	0.0262078	0.99554
79733	E2F8	-0.372429	5.36243	8.28521	0.0262287	0.99554
6594	SMARCA1	-0.810283	1.55837	8.27881	0.0262683	0.99554
257019	FRMD3	0.457037	3.42501	8.23598	0.0265353	0.99554
51088	KLHL5	0.32524	6.32665	8.22224	0.0266216	0.99554
221150	SKA3	-0.256928	6.09087	8.21808	0.0266479	0.99554
2889	RAPGEF1	0.260825	6.97486	8.21096	0.0266928	0.99554
5678	PSG9	1.19182	3.59186	8.18856	0.026835	0.99554
84460	ZMAT1	-0.511019	3.93192	8.18346	0.0268674	0.99554
127253	TYW3	-0.388473	4.33344	8.17812	0.0269016	0.99554
1155	TBCB	-0.2516	5.82769	8.17458	0.0269242	0.99554
146691	TOM1L2	0.365203	7.03913	8.16869	0.0269619	0.99554
166379	BBS12	-0.919648	1.03558	8.15655	0.0270399	0.99554
79746	ECHDC3	-0.796508	2.0606	8.14055	0.027143	0.99554
85495	NA	1.31998	-0.379684	8.13962	0.027149	0.99554
8829	NRP1	0.474993	8.334	8.12592	0.0272378	0.99554
3727	JUND	0.246204	6.5902	8.11688	0.0272966	0.99554
54578	UGT1A6	0.72399	1.70011	8.11448	0.0273122	0.99554
729799	NA	-1.00106	0.613093	8.11186	0.0273293	0.99554
79660	PPP1R3B	0.344575	4.65613	8.10371	0.0273826	0.99554
6604	SMARCD3	-0.525087	2.82702	8.09877	0.0274149	0.99554
101930249	NA	0.888262	1.14762	8.08106	0.0275312	0.99554
126917	IFFO2	0.562286	4.59632	8.04256	0.0277864	0.99554
127262	TPRG1L	0.353401	5.38829	8.04003	0.0278033	0.99554
4494	MT1F	-0.812613	1.08817	8.03096	0.0278639	0.99554
341056	NA	3.16508	-1.48946	8.00579	0.0280331	0.99554
100507436	MICA	0.25691	5.49507	8.00431	0.0280431	0.99554
29089	UBE2T	-0.25344	6.15419	7.99572	0.0281011	0.99554
4796	TONSL	-0.319721	5.63152	7.99391	0.0281133	0.99554
314	AOC2	0.928994	0.756605	7.98796	0.0281537	0.99554
6337	SCNN1A	0.27975	6.73705	7.98533	0.0281716	0.99554
23400	ATP13A2	0.325154	5.45039	7.96192	0.0283311	0.99554
5631	PRPS1	0.361798	6.23557	7.96163	0.0283331	0.99554
51162	EGFL7	0.333956	4.48119	7.95487	0.0283794	0.99554
126298	IRGQ	0.280092	5.12086	7.95168	0.0284013	0.99554
493	ATP2B4	-0.456226	5.29952	7.94831	0.0284245	0.99554
10314	LANCL1	-0.286708	6.45466	7.94715	0.0284324	0.99554
55765	INAVA	0.775933	3.28029	7.94677	0.028435	0.99554
6584	SLC22A5	0.299335	5.70568	7.93874	0.0284903	0.99554
5045	FURIN	0.263053	6.00722	7.93091	0.0285444	0.99554
26509	MYOF	0.374016	9.35251	7.92232	0.0286038	0.99554
83891	SNX25	0.504663	3.42853	7.8885	0.0288395	0.99554
2034	EPAS1	1.18108	8.35227	7.87318	0.0289471	0.99554
23349	PHF24	3.01184	-1.56853	7.86718	0.0289894	0.99554
54435	NA	-1.4845	-0.697967	7.8461	0.0291385	0.99554
100188947	NA	0.743274	1.33131	7.82522	0.0292873	0.99554
55212	BBS7	-0.395172	3.80596	7.82489	0.0292897	0.99554
2040	STOM	0.303373	6.90693	7.81792	0.0293396	0.99554
102724810	NA	2.17301	-1.49027	7.79031	0.0295384	0.99554
9564	BCAR1	0.290235	6.56351	7.78956	0.0295438	0.99554
6548	SLC9A1	0.278637	6.65738	7.78482	0.0295781	0.99554
9884	LRRC37A	-2.90886	-1.49369	7.78432	0.0295817	0.99554
375189	PFN4	-1.32467	-0.219673	7.77856	0.0296235	0.99554
101927045	NA	-0.464597	3.23294	7.76815	0.0296992	0.99554
64785	GINS3	-0.407398	4.30053	7.76272	0.0297388	0.99554
134147	CMBL	-0.266788	5.99523	7.76093	0.0297519	0.99554
51330	TNFRSF12A	0.295884	6.87818	7.74121	0.0298963	0.99554
27198	HCAR1	0.480163	5.41978	7.73	0.0299788	0.99554
730091	LINC00886	0.418585	3.72777	7.71698	0.030075	0.99554
6632	SNRPD1	-0.248215	6.31107	7.71333	0.0301021	0.99554
55366	LGR4	0.257473	5.42863	7.6888	0.0302847	0.99554
6876	TAGLN	0.998706	3.72375	7.63385	0.0306992	0.99554
91807	MYLK3	1.12812	0.146249	7.60979	0.0308831	0.99554
387103	CENPW	-0.433934	4.04102	7.6046	0.0309229	0.99554
376497	SLC27A1	-0.578474	2.30384	7.60381	0.030929	0.99554
8565	YARS1	0.236192	6.57842	7.60167	0.0309454	0.99554
4363	ABCC1	0.241033	6.62143	7.59676	0.0309832	0.99554
8916	HERC3	0.285346	6.05623	7.59476	0.0309986	0.99554
10095	ARPC1B	0.260056	8.09962	7.59474	0.0309988	0.99554
140885	SIRPA	-0.83364	1.02327	7.59472	0.030999	0.99554
140707	BRI3BP	-0.285484	5.14687	7.59025	0.0310335	0.99554
53828	FXYD4	3.01665	-1.56788	7.57559	0.0311469	0.99554
1870	E2F2	-0.334654	4.3871	7.56132	0.0312579	0.99554
8406	SRPX	0.902978	0.865342	7.55962	0.0312712	0.99554
124935	SLC43A2	0.318457	5.15249	7.55356	0.0313184	0.99554
149466	C1orf210	-0.475847	3.01492	7.52529	0.0315404	0.99554
6659	SOX4	0.292801	7.90687	7.52062	0.0315773	0.99554
102724515	NA	0.670565	3.19783	7.51515	0.0316205	0.99554
401149	NA	-0.62455	2.28717	7.50415	0.0317078	0.99554
50940	PDE11A	2.45711	-0.98197	7.49804	0.0317564	0.99554
1186	CLCN7	0.281505	6.02585	7.48749	0.0318405	0.99554
4208	MEF2C	0.7621	2.15492	7.47457	0.0319439	0.99554
483	ATP1B3	0.22101	7.18086	7.45614	0.0320922	0.99554
100507250	NUP107-DT	-1.89082	-1.15689	7.43379	0.0322733	0.99554
259	AMBP	-1.89082	-1.15689	7.43379	0.0322733	0.99554
4070	TACSTD2	0.294208	8.37299	7.43203	0.0322876	0.99554
9727	RAB11FIP3	0.268832	6.33715	7.42627	0.0323346	0.99554
10239	AP3S2	1.24229	-0.21274	7.42384	0.0323544	0.99554
8573	CASK	0.2649	6.27438	7.4148	0.0324283	0.99554
10866	HCP5	2.79153	-1.1528	7.41283	0.0324445	0.99554
10742	RAI2	0.536839	2.50479	7.41017	0.0324662	0.99554
100506409	ELOVL2-AS1	1.05291	0.241086	7.40901	0.0324757	0.99554
977	CD151	0.217753	7.24475	7.40366	0.0325196	0.99554
139886	SPIN4	-0.318664	5.1395	7.38928	0.0326381	0.99554
1785	DNM2	0.21004	7.75199	7.38521	0.0326717	0.99554
6502	SKP2	-0.367603	4.6714	7.3739	0.0327654	0.99554
114088	TRIM9	-1.35662	-0.457537	7.36756	0.0328181	0.99554
2796	GNRH1	-1.12277	0.0641234	7.36685	0.0328239	0.99554
901	CCNG2	0.274929	6.26916	7.36487	0.0328404	0.99554
594837	SNORD101	-2.05495	-1.41964	7.36461	0.0328426	0.99554
4017	LOXL2	0.935995	4.65609	7.36192	0.032865	0.99554
9057	SLC7A6	0.309299	6.53596	7.36042	0.0328775	0.99554
11168	PSIP1	-0.271399	6.86977	7.35472	0.032925	0.99554
127707	KLHDC7A	1.17174	0.170527	7.35432	0.0329284	0.99554
95681	CEP41	-0.32235	4.47413	7.35365	0.032934	0.99554
26271	FBXO5	-0.274787	5.39922	7.35061	0.0329594	0.99554
2329	FMO4	-0.703505	1.84707	7.34631	0.0329954	0.99554
344167	FOXI3	-0.880129	0.648267	7.34618	0.0329965	0.99554
338811	TAFA2	-1.35699	-0.457467	7.33336	0.0331041	0.99554
2752	GLUL	0.349982	8.49703	7.33202	0.0331154	0.99554
83879	CDCA7	-0.341165	4.5784	7.33148	0.0331199	0.99554
9249	DHRS3	1.03139	3.81283	7.3145	0.0332633	0.99554
118738	ZNF488	1.26414	2.32895	7.31438	0.0332643	0.99554
7425	VGF	0.515989	3.52448	7.30817	0.0333169	0.99554
54962	TIPIN	-0.410591	3.89939	7.3032	0.0333591	0.99554
10272	FSTL3	0.37994	5.17308	7.29672	0.0334142	0.99554
100294145	NA	-0.337902	4.82028	7.28807	0.033488	0.99554
125893	ZNF816	-0.467048	3.35442	7.28081	0.0335501	0.99554
100506994	PTPRG-AS1	-0.391293	3.97635	7.26842	0.0336564	0.99554
4846	NOS3	2.0472	-1.21475	7.25738	0.0337515	0.99554
54776	PPP1R12C	0.282347	5.43452	7.2558	0.0337652	0.99554
114798	SLITRK1	-1.70561	-0.987308	7.25233	0.0337951	0.99554
55632	G2E3	-0.278867	6.07701	7.23844	0.0339155	0.99554
729533	FAM72A	-0.481906	2.90478	7.23498	0.0339456	0.99554
51316	PLAC8	0.837084	0.979237	7.23333	0.0339599	0.99554
55723	ASF1B	-0.266299	6.57661	7.23315	0.0339615	0.99554
57214	CEMIP	1.32981	1.39526	7.23035	0.0339859	0.99554
92521	SPECC1	0.320786	6.48238	7.22694	0.0340156	0.99554
26056	RAB11FIP5	0.405417	3.57274	7.21907	0.0340843	0.99554
489	ATP2A3	0.282998	8.46979	7.21678	0.0341044	0.99554
153241	CEP120	-0.27244	5.17863	7.20015	0.0342503	0.99554
51079	NDUFA13	0.214636	6.61394	7.1896	0.0343433	0.99554
163786	SASS6	-0.353003	4.18133	7.18654	0.0343704	0.99554
102724250	NA	0.27253	5.4482	7.18077	0.0344215	0.99554
113146	AHNAK2	-0.6337	3.07928	7.17776	0.0344481	0.99554
5393	EXOSC9	-0.311403	4.85814	7.16621	0.0345508	0.99554
79083	MLPH	0.262544	8.61762	7.16419	0.0345688	0.99554
26272	FBXO4	-0.44002	3.53683	7.16333	0.0345765	0.99554
274	BIN1	1.19534	0.512133	7.15502	0.0346506	0.99554
8323	FZD6	-0.246059	6.8878	7.12616	0.0349098	0.99554
4680	CEACAM6	0.903602	5.83413	7.12463	0.0349236	0.99554
221393	ADGRF4	0.893633	1.88181	7.12131	0.0349537	0.99554
10204	NUTF2	0.216864	7.03533	7.08115	0.0353192	0.99554
3674	ITGA2B	-0.598706	2.42895	7.08078	0.0353227	0.99554
5794	PTPRH	1.40234	-0.452118	7.07477	0.0353779	0.99554
55690	PACS1	0.264337	7.67649	7.0737	0.0353876	0.99554
100532732	NA	1.68869	-0.736528	7.07128	0.0354099	0.99554
2187	FANCB	-0.564995	3.18422	7.06198	0.0354956	0.99554
723809	LHFPL3-AS2	1.85719	-0.830069	7.05186	0.0355892	0.99554
6519	SLC3A1	-2.7602	-1.5716	7.03834	0.0357147	0.99554
57819	LSM2	-0.239272	5.54869	7.0141	0.0359412	0.99554
57701	NCKAP5L	0.27639	5.10209	7.00892	0.0359898	0.99554
7408	VASP	0.234439	6.67831	6.99886	0.0360846	0.99554
408	ARRB1	0.570919	6.23903	6.99061	0.0361625	0.99554
79778	MICALL2	0.237431	5.81661	6.98898	0.0361779	0.99554
374655	ZNF710	0.27647	4.92665	6.98781	0.036189	0.99554
6567	SLC16A2	0.3143	5.33845	6.98517	0.036214	0.99554
685	BTC	2.32364	-1.41571	6.97736	0.0362881	0.99554
55015	PRPF39	-0.240126	5.99343	6.9767	0.0362944	0.99554
890	CCNA2	-0.215587	6.69998	6.96686	0.0363881	0.99554
23053	ZSWIM8	0.271382	6.17046	6.96659	0.0363907	0.99554
6674	SPAG1	0.327685	5.5125	6.95867	0.0364663	0.99554
56997	COQ8A	-0.447332	4.19676	6.95438	0.0365074	0.99554
11157	LSM6	-0.408837	3.69264	6.95377	0.0365132	0.99554
151473	SLC16A14	-0.551132	3.95659	6.94632	0.0365847	0.99554
4286	MITF	0.907652	2.58573	6.93505	0.0366932	0.99554
10467	ZNHIT1	0.283336	5.8162	6.93445	0.036699	0.99554
63898	SH2D4A	0.353818	4.87522	6.93049	0.0367372	0.99554
10013	HDAC6	-0.285388	5.32048	6.92993	0.0367426	0.99554
79144	PPDPF	0.224614	7.7722	6.92513	0.036789	0.99554
3678	ITGA5	0.585748	2.84898	6.92429	0.0367971	0.99554
55038	CDCA4	-0.260917	6.24689	6.91896	0.0368488	0.99554
26579	MYEOV	1.27402	1.42559	6.90229	0.0370109	0.99554
84973	SNHG7	0.257233	5.52603	6.9021	0.0370128	0.99554
9518	GDF15	0.942361	5.09863	6.88087	0.0372207	0.99554
11073	TOPBP1	-0.206021	7.27379	6.87037	0.0373241	0.99554
1001	CDH3	0.211269	7.27083	6.8671	0.0373564	0.99554
10538	BATF	0.433687	4.56903	6.82738	0.0377514	0.99554
728377	NA	-0.754023	1.08828	6.80997	0.0379263	0.99554
641	BLM	-0.332724	5.52236	6.79703	0.0380571	0.99554
101928053	NA	-2.42656	-1.21885	6.79295	0.0380984	0.99554
55603	TENT5A	0.226977	6.53859	6.78285	0.038201	0.99554
100507567	RAB11B-AS1	0.808785	0.964695	6.78222	0.0382074	0.99554
5155	PDGFB	0.325156	5.10639	6.7669	0.0383637	0.99554
142	PARP1	-0.216765	7.95523	6.76343	0.0383992	0.99554
130813	C2orf50	-2.05544	-1.41956	6.76247	0.0384091	0.99554
2539	G6PD	0.232455	9.28941	6.75643	0.0384711	0.99554
102724149	NA	1.66266	-1.15331	6.74515	0.0385872	0.99554
374383	NCR3LG1	-0.775323	1.13835	6.73511	0.0386909	0.99554
3146	HMGB1	-0.205003	9.24746	6.73288	0.0387139	0.99554
57591	MRTFA	0.313952	4.81814	6.73244	0.0387185	0.99554
9832	JAKMIP2	0.701451	1.57811	6.72491	0.0387966	0.99554
23642	SNHG1	-0.216746	6.35103	6.72057	0.0388417	0.99554
220323	OAF	-0.660117	1.5675	6.71774	0.0388712	0.99554
53353	LRP1B	-0.600182	2.58034	6.70994	0.0389525	0.99554
132789	GNPDA2	-0.592509	2.28079	6.70531	0.0390009	0.99554
100820829	MYZAP	-0.91341	0.504457	6.69084	0.0391526	0.99554
100507547	PRRT1	-0.871404	1.19651	6.68641	0.0391992	0.99554
9849	ZNF518A	-0.366659	5.39929	6.67705	0.039298	0.99554
150759	NA	-0.829151	1.7219	6.67567	0.0393126	0.99554
196463	PLBD2	0.254542	5.77252	6.66755	0.0393986	0.99554
26038	CHD5	0.489483	2.64537	6.65582	0.0395231	0.99554
645332	FAM86C2P	-0.562744	2.89732	6.65522	0.0395295	0.99554
90668	CARMIL3	-0.542543	2.35219	6.65103	0.0395741	0.99554
4487	MSX1	-0.807164	0.885046	6.63613	0.0397335	0.99554
3119	HLA-DQB1	0.473987	3.35875	6.6334	0.0397628	0.99554
2316	FLNA	0.332868	11.2221	6.63241	0.0397734	0.99554
647946	MIR924HG	-0.733869	1.48302	6.62383	0.0398656	0.99554
1794	DOCK2	2.45481	-1.34572	6.61041	0.0400105	0.99554
6804	STX1A	0.376181	3.68589	6.59555	0.0401717	0.99554
302	ANXA2	0.372619	8.98588	6.59101	0.0402212	0.99554
102724788	NA	-1.4276	0.0623482	6.57577	0.0403876	0.99554
51337	THEM6	0.224194	7.02732	6.5707	0.0404433	0.99554
100500905	MIR3661	1.87829	-1.03782	6.56829	0.0404698	0.99554
7086	TKT	0.253524	8.63439	6.55618	0.0406031	0.99554
102723828	NA	-0.655272	1.95366	6.55041	0.0406668	0.99554
101928262	NA	2.45364	-1.34557	6.54195	0.0407605	0.99554
53349	ZFYVE1	0.328492	5.09667	6.53824	0.0408017	0.99554
100129842	ZNF737	-0.355116	4.00505	6.53823	0.0408018	0.99554
7352	UCP3	-1.60894	-1.04138	6.53716	0.0408136	0.99554
101927838	NA	-1.1363	-0.219408	6.52775	0.0409184	0.99554
53827	FXYD5	0.961527	0.372399	6.52539	0.0409447	0.99554
113178	SCAMP4	0.242703	5.72722	6.52509	0.0409481	0.99554
100874006	TTC3-AS1	2.0069	-1.56861	6.52379	0.0409626	0.99554
399665	FAM102A	0.320788	8.53093	6.52209	0.0409816	0.99554
9311	ASIC3	0.551988	2.22011	6.51932	0.0410125	0.99554
57116	ZNF695	-0.570119	2.67548	6.51822	0.0410249	0.99554
124997	WDR81	0.297144	4.94897	6.50604	0.0411614	0.99554
125050	RN7SK	1.04003	0.585636	6.49518	0.0412837	0.99554
56650	CLDND1	-0.24535	5.52385	6.4951	0.0412846	0.99554
11144	DMC1	-0.630454	1.80133	6.49303	0.0413079	0.99554
145978	LINC00052	-0.292555	6.54125	6.48701	0.041376	0.99554
693199	MIR614	0.648224	1.97293	6.48199	0.0414328	0.99554
57619	SHROOM3	0.231065	6.00827	6.48004	0.041455	0.99554
55526	DHTKD1	-0.199883	7.63083	6.4663	0.0416112	0.99554
56967	C14orf132	0.399077	7.76226	6.4607	0.0416752	0.99554
56927	GPR108	0.297044	5.07598	6.44827	0.0418174	0.99554
214	ALCAM	0.209488	8.26083	6.44411	0.0418652	0.99554
57405	SPC25	-0.28535	4.69768	6.43427	0.0419785	0.99554
64855	NIBAN2	0.267036	7.95917	6.43195	0.0420053	0.99554
53947	A4GALT	0.535514	3.54348	6.42065	0.042136	0.99554
200958	MUC20	0.947346	2.18385	6.41828	0.0421635	0.99554
84418	CYSTM1	0.260469	4.98721	6.41377	0.0422159	0.99554
55055	ZWILCH	-0.209383	6.36226	6.41294	0.0422255	0.99554
9619	ABCG1	0.363452	4.81468	6.40847	0.0422775	0.99554
5580	PRKCD	0.198662	7.6716	6.40747	0.0422891	0.99554
672	BRCA1	-0.213186	6.39546	6.38008	0.0426098	0.99554
87	ACTN1	0.202309	8.56974	6.37229	0.0427016	0.99554
54107	POLE3	-0.19563	7.72833	6.35296	0.0429306	0.99554
51192	CKLF	-0.754377	1.60325	6.34861	0.0429823	0.99554
644861	NA	1.07054	-0.213689	6.33879	0.0430993	0.99554
439	GET3	-0.221115	6.39824	6.3379	0.04311	0.99554
5019	OXCT1	-0.35997	5.95575	6.31767	0.0433527	0.99554
348995	NUP43	-0.241989	5.68219	6.30658	0.0434865	0.99554
100996457	NA	-1.48175	-0.533454	6.30632	0.0434896	0.99554
137994	LETM2	-0.694466	1.66437	6.30021	0.0435636	0.99554
10257	ABCC4	0.44154	4.4513	6.29571	0.0436181	0.99554
116938	SNORD83B	-1.22575	-0.532834	6.29498	0.043627	0.99554
388115	CCDC9B	-0.747331	1.22059	6.28685	0.0437259	0.99554
255394	TCP11L2	0.472734	2.88827	6.28656	0.0437294	0.99554
201254	CENPX	0.228406	6.27173	6.28421	0.043758	0.99554
5653	KLK6	1.05001	1.45782	6.28227	0.0437817	0.99554
145788	PIERCE2	-1.49087	-0.884035	6.28063	0.0438018	0.99554
10592	SMC2	-0.307063	6.81131	6.27928	0.0438182	0.99554
27324	TOX3	3.01023	-1.56875	6.27861	0.0438264	0.99554
727851	RGPD8	-1.04937	-0.0704117	6.2751	0.0438693	0.99554
124359	CDYL2	0.409122	4.86729	6.27443	0.0438774	0.99554
6520	SLC3A2	0.300514	7.74415	6.26795	0.0439568	0.99554
889	KRIT1	-0.229212	5.66216	6.26361	0.0440102	0.99554
4322	MMP13	1.23737	0.351034	6.26311	0.0440162	0.99554
101928717	NA	1.7927	-1.34601	6.25433	0.0441243	0.99554
133686	NADK2	-0.266049	5.29585	6.22791	0.0444516	0.99554
23012	STK38L	0.314529	5.9252	6.22193	0.0445261	0.99554
126410	CYP4F22	-1.35774	-0.457327	6.22085	0.0445396	0.99554
9837	GINS1	-0.25958	6.57758	6.21964	0.0445547	0.99554
22979	EFR3B	0.404727	5.05821	6.21932	0.0445587	0.99554
59	ACTA2	0.800654	3.04679	6.21545	0.0446071	0.99554
9824	ARHGAP11A	-0.280768	7.11531	6.21204	0.0446497	0.99554
9218	VAPA	0.207954	7.21866	6.20657	0.0447183	0.99554
29028	ATAD2	-0.243557	8.82052	6.20077	0.0447912	0.99554
65062	TMEM237	-0.363387	4.37981	6.19615	0.0448493	0.99554
4486	MST1R	-0.756321	1.62929	6.18329	0.0450117	0.99554
339416	ANKRD45	-1.78022	-1.2182	6.17008	0.0451794	0.99554
2719	GPC3	-0.880149	0.542034	6.1527	0.0454011	0.99554
10926	DBF4	-0.227481	6.11053	6.1515	0.0454165	0.99554
29923	HILPDA	0.343793	6.11114	6.14645	0.0454812	0.99554
221481	ARMC12	-0.99857	0.613836	6.14364	0.0455174	0.99554
9080	CLDN9	0.274054	5.58992	6.13589	0.045617	0.99554
100132352	NA	-0.642443	1.86958	6.13372	0.045645	0.99554
148213	ZNF681	-0.394746	3.87619	6.13108	0.045679	0.99554
114907	FBXO32	0.558368	2.85129	6.12267	0.0457878	0.99554
5207	PFKFB1	-0.96951	0.210692	6.12189	0.0457979	0.99554
7378	UPP1	0.671302	1.88128	6.1181	0.045847	0.99554
64168	NECAB1	0.281273	6.1125	6.11742	0.0458558	0.99554
27336	HTATSF1	-0.199234	7.45673	6.11194	0.045927	0.99554
104	ADARB1	0.23825	6.14176	6.09862	0.0461006	0.99554
22868	FASTKD2	-0.206821	6.17995	6.09567	0.0461392	0.99554
149345	SHISA4	0.679514	1.73466	6.09513	0.0461463	0.99554
728723	NA	-0.965622	0.27896	6.09082	0.0462028	0.99554
3958	LGALS3	0.216085	8.13201	6.08884	0.0462287	0.99554
285386	TPRG1	-1.35277	-0.457263	6.08384	0.0462943	0.99554
219287	AMER2	0.751247	3.5203	6.08265	0.04631	0.99554
113026	PLCD3	0.346478	6.4865	6.07962	0.0463498	0.99554
23138	N4BP3	0.398003	6.5897	6.07877	0.046361	0.99554
6309	SC5D	0.260866	6.45901	6.07862	0.046363	0.99554
51514	DTL	-0.280023	5.26433	6.07405	0.0464232	0.99554
253714	MMS22L	-0.259895	5.49728	6.07068	0.0464677	0.99554
11072	DUSP14	0.312016	4.4774	6.06926	0.0464864	0.99554
55345	ZGRF1	-0.275057	4.68416	6.05628	0.0466584	0.99554
100506538	NA	0.578651	2.13692	6.05336	0.0466972	0.99554
284266	SIGLEC15	0.567183	1.9445	6.0432	0.0468325	0.99554
79611	ACSS3	-0.235296	5.43798	6.03566	0.0469332	0.99554
5378	PMS1	-0.306864	4.90587	6.0336	0.0469608	0.99554
51706	CYB5R1	0.354724	6.16682	6.03005	0.0470085	0.99554
401052	NA	0.700164	1.38473	6.02832	0.0470316	0.99554
90441	ZNF622	0.229619	5.39942	6.02692	0.0470504	0.99554
6286	S100P	0.52101	4.64885	6.01573	0.047201	0.99554
22897	CEP164	0.287147	4.99441	6.00373	0.0473631	0.99554
6281	S100A10	0.400296	8.45094	6.00219	0.0473841	0.99554
79758	DHRS12	-0.402902	3.42391	6.00188	0.0473882	0.99554
55323	LARP6	0.583422	1.98666	6.00068	0.0474046	0.99554
1509	CTSD	0.415637	9.99505	5.99549	0.047475	0.99554
8754	ADAM9	0.261316	7.02492	5.99386	0.0474972	0.99554
1796	DOK1	-0.405673	3.21412	5.99317	0.0475065	0.99554
100506922	MAP3K2-DT	-0.748367	1.01021	5.99279	0.0475117	0.99554
101929547	NA	-0.702024	1.7388	5.9917	0.0475265	0.99554
126433	FBXO27	-0.424378	3.80108	5.99169	0.0475267	0.99554
7439	BEST1	1.30367	-0.783639	5.98802	0.0475766	0.99554
10620	ARID3B	-0.500539	2.68039	5.97598	0.0477411	0.99554
8334	H2AC6	0.316459	4.18807	5.96606	0.0478771	0.99554
256302	NATD1	0.755817	2.95841	5.95821	0.0479852	0.99554
9700	ESPL1	-0.217205	6.77099	5.95029	0.0480945	0.99554
10085	EDIL3	1.47242	-1.03767	5.94388	0.0481832	0.99554
9095	TBX19	-0.962974	0.69771	5.94011	0.0482355	0.99554
101928324	NA	-1.70867	-0.987303	5.93994	0.048238	0.99554
2178	FANCE	-0.365169	3.61398	5.93993	0.0482381	0.99554
3909	LAMA3	0.558654	3.89257	5.93856	0.0482571	0.99554
1159	CKMT1B	-0.491863	2.64998	5.91601	0.0485716	0.99554
348487	FAM131C	1.04304	0.58676	5.91403	0.0485994	0.99554
11343	MGLL	0.694964	6.23869	5.908	0.0486841	0.99554
101927813	NA	-1.90729	-1.4934	5.90655	0.0487045	0.99554
8635	RNASET2	0.230015	5.48464	5.90052	0.0487892	0.99554
9880	ZBTB39	-0.389947	3.90901	5.89429	0.0488772	0.99554
55559	HAUS7	-0.363073	4.42145	5.88903	0.0489516	0.99554
4171	MCM2	-0.231538	7.52275	5.88188	0.0490529	0.99554
10195	ALG3	0.260882	5.31802	5.88174	0.0490549	0.99554
101929619	NA	-1.09476	-0.0424098	5.88154	0.0490578	0.99554
339804	C2orf74	-0.352784	3.85637	5.87707	0.0491213	0.99554
9738	CCP110	-0.219681	6.7066	5.87427	0.0491611	0.99554
2622	GAS8	-0.250308	5.9625	5.86914	0.0492342	0.99554
80184	CEP290	-0.261221	4.99419	5.86336	0.0493167	0.99554
4678	NASP	-0.228643	7.06422	5.85926	0.0493754	0.99554
165918	RNF168	-0.243051	5.23166	5.85814	0.0493915	0.99554
51084	CRYL1	0.279595	5.21706	5.85587	0.049424	0.99554
23089	PEG10	-0.478358	3.30194	5.85368	0.0494554	0.99554
11346	SYNPO	0.517104	4.10562	5.8533	0.0494609	0.99554
6196	RPS6KA2	0.536172	4.1942	5.84785	0.0495392	0.99554
79794	SPRING1	0.238709	7.04946	5.84459	0.049586	0.99554
55040	EPN3	-0.300504	5.99162	5.83992	0.0496534	0.99554
9149	DYRK1B	0.396251	4.33691	5.83861	0.0496723	0.99554
55022	PID1	1.20762	0.263636	5.83692	0.0496967	0.99554
10344	CCL26	1.6871	-0.737095	5.83261	0.049759	0.99554
101929040	NA	-1.00275	-0.0989005	5.83093	0.0497833	0.99554
55296	TBC1D19	-0.902229	0.715653	5.82535	0.0498642	0.99554
284561	NA	0.953017	0.531037	5.82257	0.0499046	0.99554
7414	VCL	0.20119	6.87441	5.81823	0.0499677	0.99554
84056	KATNAL1	-0.315187	4.58031	5.81374	0.0500331	0.99554
81619	TSPAN14	0.250735	6.87092	5.81165	0.0500635	0.99554
5578	PRKCA	0.366292	4.54913	5.81003	0.0500871	0.99554
84986	ARHGAP19	-0.30074	4.67143	5.80228	0.0502004	0.99554
90407	TMEM41A	0.264082	4.98938	5.79864	0.0502537	0.99554
116372	LYPD1	0.302276	4.81563	5.7949	0.0503086	0.99554
8612	PLPP2	0.254903	5.44563	5.79483	0.0503096	0.99554
100507507	NA	0.585395	2.90088	5.79155	0.0503578	0.99554
402160	CFAP99	2.00854	-1.56839	5.78735	0.0504196	0.99554
1382	CRABP2	-0.238522	8.76871	5.78619	0.0504367	0.99554
55744	COA1	-0.208643	5.88636	5.76852	0.0506979	0.99554
9636	ISG15	0.243911	5.38446	5.75592	0.0508853	0.99554
102723652	NA	-1.10013	-0.0427414	5.755	0.050899	0.99554
159090	PABIR2	-0.203704	7.40891	5.75347	0.0509218	0.99554
390927	ZNF793	-0.390716	3.57615	5.74091	0.0511097	0.99554
730130	TMEM229A	0.931027	0.170538	5.73942	0.0511321	0.99554
1201	CLN3	0.216426	6.67281	5.73787	0.0511553	0.99554
26769	NA	0.751737	0.894074	5.73683	0.0511709	0.99554
51473	DCDC2	0.427936	5.34	5.72552	0.0513412	0.99554
6662	SOX9	0.656655	3.5056	5.71386	0.0515175	0.99554
100287934	NA	2.3211	-1.41623	5.70611	0.0516352	0.99554
79960	JADE1	-0.349743	4.81625	5.696	0.0517891	0.99554
4814	NINJ1	0.223617	6.6875	5.68774	0.0519153	0.99554
23236	PLCB1	0.214356	5.69327	5.68768	0.0519162	0.99554
389906	NA	0.45623	2.97608	5.68025	0.0520302	0.99554
8343	H2BC7	0.767723	1.23101	5.67779	0.052068	0.99554
7374	UNG	-0.194474	7.06888	5.66923	0.0521997	0.99554
56884	FSTL5	-0.904292	1.94567	5.66653	0.0522414	0.99554
55561	CDC42BPG	0.251481	6.14775	5.66272	0.0523003	0.99554
26503	SLC17A5	0.340973	4.33923	5.66202	0.0523112	0.99554
441478	NRARP	-0.251136	4.90667	5.65022	0.0524941	0.99554
6881	TAF10	0.277292	4.54123	5.64797	0.0525291	0.99554
2799	GNS	0.221334	8.20309	5.64067	0.0526427	0.99554
8476	CDC42BPA	0.241958	6.8297	5.63967	0.0526584	0.99554
9394	HS6ST1	0.214993	6.15015	5.63552	0.0527231	0.99554
3181	HNRNPA2B1	-0.191721	10.6914	5.62995	0.0528103	0.99554
645323	LINC00461	-0.657858	1.2328	5.6177	0.0530027	0.99554
148206	ZNF714	-0.410466	4.86522	5.61557	0.0530362	0.99554
580	BARD1	-0.344416	5.398	5.60899	0.05314	0.99554
10430	TMEM147	0.222018	5.75511	5.60065	0.053272	0.99554
161	AP2A2	0.250404	5.64073	5.59593	0.0533469	0.99554
134957	STXBP5	0.207316	6.14674	5.5955	0.0533537	0.99554
23137	SMC5	-0.223692	5.70624	5.59404	0.0533769	0.99554
55971	BAIAP2L1	0.330988	5.07542	5.59068	0.0534302	0.99554
11169	WDHD1	-0.212592	6.13997	5.58758	0.0534796	0.99554
78992	YIPF2	0.264024	5.36572	5.57709	0.053647	0.99554
100289097	NA	-2.18388	-0.987231	5.573	0.0537126	0.99554
5058	PAK1	-0.60635	4.25569	5.57136	0.0537389	0.99554
26031	OSBPL3	1.34156	-0.152493	5.56786	0.053795	0.99554
57282	SLC4A10	-0.623819	2.22557	5.56473	0.0538453	0.99554
7112	TMPO	-0.18487	8.61189	5.55427	0.0540137	0.99554
4722	NDUFS3	-0.21741	6.38413	5.55399	0.0540183	0.99554
6820	SULT2B1	0.254528	5.26559	5.54644	0.0541404	0.99554
80028	FBXL18	0.248519	5.76897	5.54611	0.0541458	0.99554
22837	COBLL1	0.205189	6.08271	5.53565	0.0543154	0.99554
100316904	SAP25	0.634734	1.49444	5.53304	0.054358	0.99554
7022	TFAP2C	0.198645	7.81807	5.52439	0.0544991	0.99554
340533	NEXMIF	-0.928533	0.869997	5.5239	0.0545071	0.99554
79789	CLMN	0.34594	6.21545	5.518	0.0546035	0.99554
100996497	NA	-0.494761	2.6338	5.51343	0.0546784	0.99554
65108	MARCKSL1	0.20137	7.85751	5.5133	0.0546806	0.99554
3485	IGFBP2	0.192235	7.13399	5.50631	0.0547954	0.99554
101927979	NA	-0.880715	0.485232	5.49892	0.0549172	0.99554
4685	NCAM2	-0.211627	8.10893	5.49797	0.054933	0.99554
101559451	PELP1-DT	-0.933471	0.115245	5.48398	0.0551646	0.99554
113835	ZNF257	-0.627124	1.75379	5.48172	0.0552021	0.99554
64759	TNS3	0.515075	6.44546	5.48088	0.0552162	0.99554
26153	KIF26A	-0.286839	4.62141	5.47311	0.0553455	0.99554
55715	DOK4	-0.427811	3.60984	5.47205	0.0553631	0.99554
57560	IFT80	-0.235338	5.31371	5.45011	0.0557309	0.99554
91768	CABLES1	0.287365	5.4175	5.44713	0.055781	0.99554
102724108	NA	-2.05593	-1.41949	5.44449	0.0558256	0.99554
246181	AKR7L	-2.05593	-1.41949	5.44449	0.0558256	0.99554
93986	FOXP2	-2.05593	-1.41949	5.44449	0.0558256	0.99554
283149	BCL9L	0.199823	8.34037	5.43731	0.0559469	0.99554
641977	NA	-0.355199	3.57653	5.42708	0.0561203	0.99554
79825	EFCC1	-0.99039	-0.0148121	5.4142	0.0563397	0.99554
55250	ELP2	-0.202644	7.1871	5.40901	0.0564284	0.99554
221	ALDH3B1	0.542222	3.79641	5.40057	0.0565731	0.99554
122961	ISCA2	-0.306212	4.6783	5.39732	0.0566291	0.99554
4294	MAP3K10	0.417864	3.07283	5.39409	0.0566846	0.99554
100507399	NA	-1.12594	0.064324	5.38883	0.0567752	0.99554
100505975	ENO1-AS1	-1.15566	-0.572279	5.38146	0.0569026	0.99554
8340	H2BC13	-1.02707	-0.283035	5.37567	0.0570029	0.99554
23287	AGTPBP1	-0.277229	4.44696	5.37424	0.0570278	0.99554
340252	ZNF680	-0.294972	4.85131	5.36702	0.0571533	0.99554
374378	GALNT18	0.463742	2.43029	5.36334	0.0572174	0.99554
101927861	NA	0.545443	5.08364	5.36048	0.0572672	0.99554
133022	TRAM1L1	-0.831379	0.854846	5.34567	0.0575266	0.99554
2036	EPB41L1	0.192355	6.69206	5.33982	0.0576295	0.99554
57030	SLC17A7	-1.02005	0.163412	5.33322	0.0577458	0.99554
9881	TRANK1	-0.522043	2.83554	5.32629	0.0578682	0.99554
1281	COL3A1	-0.742068	1.22188	5.32161	0.0579511	0.99554
24148	PRPF6	-0.223818	8.00002	5.31839	0.0580084	0.99554
22891	ZNF365	0.715507	1.34141	5.31357	0.058094	0.99554
375444	C5orf34	-0.443828	3.38132	5.31322	0.0581003	0.99554
9355	LHX2	-0.480596	2.50658	5.31289	0.0581061	0.99554
79968	WDR76	-0.361006	4.45212	5.31222	0.0581181	0.99554
55293	UEVLD	0.208135	5.85513	5.30684	0.0582139	0.99554
222256	CDHR3	1.88738	-1.0366	5.30084	0.0583212	0.99554
30850	CDR2L	0.239982	4.95475	5.29847	0.0583635	0.99554
4703	NEB	-0.904173	4.00002	5.29788	0.0583742	0.99554
8140	SLC7A5	0.498528	8.2874	5.29772	0.058377	0.99554
80223	RAB11FIP1	0.254647	6.47178	5.29559	0.0584152	0.99554
400512	NSMCE1-DT	1.62696	-0.606927	5.29519	0.0584223	0.99554
35	ACADS	-0.481407	2.70156	5.29255	0.0584696	0.99554
79739	TTLL7	-0.442531	2.67674	5.2833	0.058636	0.99554
79135	APOO	-0.368856	3.56621	5.28284	0.0586442	0.99554
1719	DHFR	-0.220779	5.89864	5.28175	0.0586639	0.99554
83986	FAM234A	0.200842	7.17664	5.27883	0.0587166	0.99554
102724112	NA	-0.85449	0.577788	5.27141	0.0588507	0.99554
440482	ANKRD20A4P	-0.524146	2.52097	5.26981	0.0588797	0.99554
8728	ADAM19	-0.697136	0.942444	5.26675	0.0589353	0.99554
101929796	NOTCH2NLR	0.754786	0.656294	5.26374	0.0589898	0.99554
9937	DCLRE1A	-0.247331	4.79533	5.2499	0.0592418	0.99554
51659	GINS2	-0.212482	6.57566	5.24212	0.0593842	0.99554
4116	MAGOH	-0.254151	4.70409	5.2395	0.0594322	0.99554
26152	ZNF337	-0.243453	4.87504	5.23677	0.0594824	0.99554
5609	MAP2K7	0.353304	4.56651	5.23652	0.0594869	0.99554
54858	PGPEP1	0.371664	5.15492	5.23216	0.0595671	0.99554
79971	WLS	0.674139	2.32827	5.22917	0.0596222	0.99554
7035	TFPI	0.31661	6.56568	5.22311	0.0597339	0.99554
83541	FAM110A	0.33469	3.75219	5.21863	0.0598168	0.99554
51184	GPN3	-0.276421	4.71437	5.21824	0.059824	0.99554
54996	MTARC2	-0.329977	3.71588	5.21399	0.0599026	0.99554
23181	DIP2A	0.182495	6.68856	5.21307	0.0599197	0.99554
100422943	MIR3189	1.46341	-0.41597	5.21272	0.0599262	0.99554
27351	DESI1	0.264134	4.96919	5.21258	0.0599289	0.99554
9204	ZMYM6	-0.308268	4.08761	5.21139	0.059951	0.99554
157285	PRAG1	0.42447	4.0067	5.21046	0.0599681	0.99554
84060	RBM48	-0.344201	4.29667	5.20779	0.0600177	0.99554
10717	AP4B1	-0.233785	6.04012	5.20735	0.0600259	0.99554
6809	STX3	0.290821	6.1448	5.20296	0.0601076	0.99554
55536	CDCA7L	-0.260098	5.36917	5.19534	0.0602498	0.99554
11070	TMEM115	0.222986	5.27588	5.19407	0.0602736	0.99554
84295	PHF6	-0.230065	6.34986	5.1914	0.0603234	0.99554
55388	MCM10	-0.247933	6.26528	5.19095	0.0603318	0.99554
55364	IMPACT	-0.230762	5.57937	5.18772	0.0603923	0.99554
306	ANXA3	0.564914	6.37656	5.18564	0.0604313	0.99554
23428	SLC7A8	-0.583423	2.38772	5.18201	0.0604995	0.99554
5757	PTMA	-0.21122	10.3706	5.17784	0.0605779	0.99554
2909	ARHGAP35	0.227069	8.00288	5.17727	0.0605887	0.99554
81491	GPR63	-0.632032	1.18685	5.17309	0.0606673	0.99554
375287	RBM43	-0.389068	3.10962	5.17081	0.0607105	0.99554
10653	SPINT2	0.174136	8.87831	5.16907	0.0607433	0.99554
26993	AKAP8L	0.26788	6.06263	5.16416	0.0608362	0.99554
8914	TIMELESS	-0.178582	7.8405	5.15994	0.060916	0.99554
113802	HENMT1	-0.249882	6.29974	5.15666	0.0609783	0.99554
23233	EXOC6B	0.301817	5.97852	5.15533	0.0610035	0.99554
57538	ALPK3	0.95829	1.82029	5.1522	0.0610629	0.99554
868	CBLB	0.246763	4.87613	5.14736	0.0611552	0.99554
84665	MYPN	1.00258	0.145201	5.14656	0.0611704	0.99554
94103	ORMDL3	0.257182	5.06468	5.14579	0.0611851	0.99554
100506990	NA	-0.71649	1.33234	5.14005	0.0612947	0.99554
23052	ENDOD1	-0.247987	4.98405	5.1385	0.0613245	0.99554
80070	ADAMTS20	-1.02704	0.0901064	5.13736	0.0613461	0.99554
1745	DLX1	-0.34184	4.32108	5.13707	0.0613517	0.99554
11320	MGAT4A	0.264179	6.37698	5.12919	0.0615027	0.99554
102724077	NA	-1.01186	-0.18772	5.12918	0.061503	0.99554
157570	ESCO2	-0.226576	5.58069	5.12672	0.0615502	0.99554
654466	NA	1.32463	-0.0651194	5.12259	0.0616296	0.99554
7126	TNFAIP1	0.199482	6.15878	5.12254	0.0616307	0.99554
55337	SHFL	0.590509	1.66502	5.12225	0.0616363	0.99554
22865	SLITRK3	-2.03838	-0.788272	5.11916	0.0616959	0.99554
23362	PSD3	0.264082	6.37419	5.11904	0.0616982	0.99554
11158	RABL2B	-0.348035	3.62054	5.11858	0.0617071	0.99554
83666	PARP9	0.242485	5.48533	5.11351	0.061805	0.99554
100996573	NA	0.695219	1.53104	5.10714	0.0619283	0.99554
161725	OTUD7A	-0.813394	0.323101	5.10367	0.0619956	0.99554
9811	CTIF	0.346624	3.76278	5.10115	0.0620444	0.99554
2956	MSH6	-0.191365	7.56731	5.10023	0.0620623	0.99554
151354	LRATD1	0.381515	6.44618	5.1001	0.0620648	0.99554
55872	PBK	-0.196512	5.91854	5.09983	0.0620701	0.99554
283377	SPRYD4	0.268541	4.5586	5.09948	0.062077	0.99554
6051	RNPEP	0.210634	6.62358	5.09922	0.0620819	0.99554
5986	RFNG	0.340294	4.18407	5.09443	0.0621753	0.99554
439990	LINC00857	1.12769	-0.277623	5.08469	0.0623654	0.99554
3872	KRT17	1.69462	0.0705782	5.08343	0.0623901	0.99554
54472	TOLLIP	0.307593	4.68524	5.08216	0.062415	0.99554
1831	TSC22D3	0.400958	7.42709	5.07859	0.0624849	0.99554
3603	IL16	1.38215	0.146175	5.07427	0.0625698	0.99554
25777	SUN2	0.232116	5.55452	5.07232	0.0626081	0.99554
10133	OPTN	0.464404	5.42754	5.07128	0.0626286	0.99554
8605	PLA2G4C	0.577354	1.65695	5.06768	0.0626995	0.99554
286077	FAM83H	0.182488	7.62981	5.06549	0.0627426	0.99554
51604	PIGT	0.186933	7.27181	5.06135	0.0628243	0.99554
11001	SLC27A2	-0.299342	4.13145	5.04894	0.0630703	0.99554
146206	CARMIL2	0.620643	1.34076	5.04404	0.0631677	0.99554
4752	NEK3	-0.422122	3.01503	5.04256	0.0631971	0.99554
84250	SLF1	-0.272058	4.53725	5.03805	0.063287	0.99554
9266	CYTH2	0.186375	6.53894	5.03782	0.0632916	0.99554
4645	MYO5B	0.227598	6.52753	5.0378	0.0632919	0.99554
80004	ESRP2	0.198097	7.36311	5.03649	0.0633182	0.99554
8701	DNAH11	1.44863	-0.0919135	5.03621	0.0633237	0.99554
340024	SLC6A19	-1.90628	-1.49355	5.03289	0.0633901	0.99554
10493	VAT1	0.270849	7.33517	5.03167	0.0634145	0.99554
112479	ERI2	-0.200989	5.93158	5.03134	0.0634211	0.99554
3006	H1-2	0.266267	5.52284	5.03115	0.0634249	0.99554
22807	IKZF2	-0.252255	4.69981	5.0297	0.063454	0.99554
100506282	NA	0.966999	-0.182691	5.02935	0.0634609	0.99554
6692	SPINT1	0.18841	7.46801	5.02425	0.0635632	0.99554
6455	SH3GL1	0.191042	6.3727	5.02281	0.0635921	0.99554
64793	CEP85	-0.239951	5.02606	5.02063	0.063636	0.99554
4233	MET	-0.387173	5.71192	5.01757	0.0636975	0.99554
4175	MCM6	-0.217608	7.68786	5.01274	0.0637948	0.99554
51204	TACO1	-0.201912	6.09889	5.00524	0.0639463	0.99554
8751	ADAM15	0.217463	7.2646	4.99877	0.0640774	0.99554
79469	NA	-2.18699	-1.34927	4.9932	0.0641906	0.99554
56126	PCDHB10	-0.725569	1.62874	4.98946	0.0642667	0.99554
4436	MSH2	-0.18489	6.92317	4.98141	0.064431	0.99554
9274	BCL7C	-0.223229	5.3773	4.98029	0.0644539	0.99554
10613	ERLIN1	-0.198944	5.86544	4.97906	0.064479	0.99554
55344	PLCXD1	-0.341636	4.2144	4.97545	0.064553	0.99554
3070	HELLS	-0.312131	5.86611	4.97522	0.0645576	0.99554
255488	RNF144B	0.389313	4.30376	4.96914	0.0646824	0.99554
136	ADORA2B	1.19541	-0.451493	4.96175	0.0648345	0.99554
3354	HTR1E	-1.90779	-1.49332	4.95762	0.0649197	0.99554
223	ALDH9A1	-0.182941	6.3217	4.95408	0.0649928	0.99554
5791	PTPRE	0.549586	2.66802	4.95401	0.0649943	0.99554
6241	RRM2	-0.185434	8.78554	4.9539	0.0649966	0.99554
91862	MARVELD3	0.236434	5.32631	4.95308	0.0650134	0.99554
55789	DEPDC1B	-0.213248	5.38966	4.95116	0.0650533	0.99554
102723983	NA	0.834687	0.41267	4.94913	0.0650953	0.99554
6775	STAT4	0.790471	0.87862	4.9477	0.0651248	0.99554
3092	HIP1	-0.280609	6.85825	4.94237	0.0652355	0.99554
84503	ZNF527	-0.684617	1.7467	4.94209	0.0652414	0.99554
101927797	NA	-1.29144	-0.494165	4.94016	0.0652815	0.99554
5062	PAK2	0.182989	8.93193	4.93541	0.0653804	0.99554
55693	KDM4D	-0.89377	0.0124049	4.9326	0.065439	0.99554
101928160	ZNF707	1.64303	-1.41666	4.92657	0.065565	0.99554
63967	CLSPN	-0.235453	5.44225	4.9258	0.0655811	0.99554
8878	SQSTM1	0.274226	8.36393	4.92427	0.0656132	0.99554
100507588	TGFBR3L	0.886184	-0.0649729	4.91851	0.0657339	0.99554
548596	CKMT1A	-0.558113	2.49278	4.91803	0.0657441	0.99554
5538	PPT1	0.276678	8.33201	4.91116	0.0658886	0.99554
7586	ZKSCAN1	0.198715	8.06051	4.91094	0.0658932	0.99554
101928803	NA	-1.24047	-0.834858	4.91075	0.0658972	0.99554
261729	STEAP2	-1.24047	-0.834858	4.91075	0.0658972	0.99554
83719	YPEL3	0.180723	6.43208	4.90854	0.0659437	0.99554
114991	ZNF618	-0.253155	5.24158	4.90607	0.0659959	0.99554
134121	C5orf49	-1.15802	-0.572347	4.90492	0.0660202	0.99554
7056	THBD	0.751082	4.71405	4.90246	0.0660721	0.99554
144404	TMEM120B	0.223138	5.09359	4.90246	0.0660721	0.99554
414216	NA	1.19448	-0.451353	4.90152	0.0660921	0.99554
55028	C17orf80	-0.228835	5.26403	4.90088	0.0661055	0.99554
7594	ZNF43	-0.448783	3.584	4.90051	0.0661133	0.99554
64403	CDH24	0.246313	5.38519	4.90025	0.0661188	0.99554
81611	ANP32E	-0.188004	7.16255	4.89851	0.0661558	0.99554
550112	NA	-0.478393	2.54494	4.89802	0.0661661	0.99554
29984	RHOD	0.289756	5.86022	4.89737	0.0661798	0.99554
90007	MIDN	0.250708	6.64804	4.8883	0.0663724	0.99554
284702	NA	-0.446431	3.43953	4.87738	0.0666053	0.99554
4778	NFE2	1.54342	-1.21439	4.87596	0.0666356	0.99554
90410	IFT20	0.430221	3.86689	4.87578	0.0666393	0.99554
5606	MAP2K3	0.296326	5.28075	4.8755	0.0666454	0.99554
27127	SMC1B	-0.811978	0.257115	4.87299	0.0666991	0.99554
81609	SNX27	0.191715	6.89364	4.87034	0.0667559	0.99554
55281	TMEM140	0.724432	1.83739	4.86604	0.0668481	0.99554
9900	SV2A	-1.39051	-1.15653	4.8647	0.0668769	0.99554
22848	AAK1	0.208352	5.47895	4.86055	0.0669662	0.99554
653	BMP5	-0.92113	0.386135	4.86005	0.066977	0.99554
8991	SELENBP1	-0.234169	6.81551	4.86002	0.0669776	0.99554
90233	ZNF551	-0.35735	3.46396	4.85835	0.0670135	0.99554
10577	NPC2	0.184975	6.42116	4.85647	0.0670541	0.99554
64837	KLC2	0.181326	6.43314	4.85125	0.0671668	0.99554
3797	KIF3C	0.234928	5.33513	4.84644	0.0672708	0.99554
60494	CCDC81	1.01507	-0.245093	4.8453	0.0672955	0.99554
92714	ARRDC1	0.272834	6.77003	4.84317	0.0673416	0.99554
56100	PCDHGB6	-1.27158	-0.654634	4.84184	0.0673704	0.99554
23263	MCF2L	0.282779	5.2527	4.83702	0.0674753	0.99554
84619	ZGPAT	0.270781	5.28169	4.83696	0.0674766	0.99554
29965	CDIP1	2.31798	-1.41666	4.83596	0.0674983	0.99554
8139	GAN	0.423704	5.4987	4.8357	0.0675038	0.99554
1735	DIO3	0.915925	0.706198	4.83471	0.0675255	0.99554
128061	C1orf131	-0.27668	4.39298	4.83286	0.0675657	0.99554
826	CAPNS1	0.186098	8.6633	4.82261	0.0677895	0.99554
114609	TIRAP	-0.423457	2.76622	4.81974	0.0678524	0.99554
6774	STAT3	0.264316	6.75453	4.81339	0.0679917	0.99554
130916	MTERF4	-0.216734	5.83354	4.80932	0.0680811	0.99554
5982	RFC2	-0.182032	6.11441	4.80898	0.0680888	0.99554
3880	KRT19	0.176822	10.8867	4.80867	0.0680955	0.99554
688	KLF5	0.237957	5.37856	4.80783	0.068114	0.99554
196951	FAM227B	-0.790337	1.34248	4.80741	0.0681232	0.99554
8208	CHAF1B	-0.272307	5.07736	4.80235	0.0682348	0.99554
10795	ZNF268	-0.352271	5.2696	4.79655	0.0683631	0.99554
100996756	NA	1.06149	-0.311508	4.79281	0.0684457	0.99554
84289	ING5	-0.246492	5.32256	4.79154	0.0684741	0.99554
27092	CACNG4	0.167861	8.62499	4.7829	0.068666	0.99554
7138	TNNT1	-0.297946	5.59534	4.78269	0.0686707	0.99554
360	AQP3	0.246045	5.90158	4.78011	0.068728	0.99554
5672	PSG4	0.827045	1.26529	4.77338	0.0688783	0.99554
2676	GFRA3	-0.945288	0.466386	4.77219	0.068905	0.99554
55672	NBPF1	0.284633	4.4641	4.77148	0.0689207	0.99554
10801	SEPTIN9	0.350819	8.06892	4.75882	0.0692048	0.99554
1573	CYP2J2	-0.355819	3.62959	4.75382	0.0693174	0.99554
339942	NA	-0.558275	1.89961	4.75256	0.0693459	0.99554
284358	MAMSTR	-1.02815	-0.283308	4.75004	0.0694027	0.99554
22995	CEP152	-0.408897	4.22742	4.74767	0.0694564	0.99554
266812	NAP1L5	-1.16756	-0.0999035	4.74551	0.0695051	0.99554
80817	CEP44	-0.307046	3.79762	4.74512	0.069514	0.99554
4832	NME3	0.251914	4.55185	4.74441	0.0695301	0.99554
2063	NR2F6	0.236159	5.514	4.74262	0.0695706	0.99554
55719	SLF2	-0.179055	6.57865	4.74025	0.0696244	0.99554
3949	LDLR	0.173301	7.66616	4.7383	0.0696684	0.99554
90499	FAM95A	-1.08283	-0.612696	4.73589	0.0697234	0.99554
140459	ASB6	0.197471	5.52094	4.73493	0.0697452	0.99554
100526833	NA	-1.74221	-1.57124	4.81099	0.0698141	0.99554
7367	UGT2B17	-0.648779	0.91476	4.72813	0.0698998	0.99554
375616	KCP	-1.50561	-1.09802	4.72787	0.0699059	0.99554
2934	GSN	0.475395	6.48994	4.72784	0.0699065	0.99554
8996	NOL3	-0.262688	4.4879	4.72628	0.069942	0.99554
64063	PRSS22	0.456501	4.41718	4.72446	0.0699837	0.99554
9060	PAPSS2	0.453572	6.08878	4.72443	0.0699844	0.99554
375791	CYSRT1	0.673149	2.81647	4.72089	0.0700652	0.99554
25841	ABTB2	0.258585	5.14443	4.72061	0.0700717	0.99554
966	CD59	0.231821	7.89717	4.71991	0.0700877	0.99554
23558	WBP2	0.228714	7.02197	4.71917	0.0701046	0.99554
26020	LRP10	0.185711	8.29611	4.71849	0.0701201	0.99554
100131655	ZNF236-DT	1.36285	-0.607621	4.71812	0.0701286	0.99554
9921	RNF10	0.183365	7.70825	4.71602	0.0701767	0.99554
51714	SELENOT	0.186948	7.74617	4.71179	0.0702737	0.99554
23433	RHOQ	0.198089	6.29215	4.71062	0.0703008	0.99554
55902	ACSS2	0.234035	5.34599	4.70725	0.0703782	0.99554
729678	LINC00847	-0.232207	4.87217	4.70118	0.070518	0.99554
84929	FIBCD1	0.356656	3.4783	4.694	0.070684	0.99554
51232	CRIM1	0.229488	5.65403	4.69252	0.0707183	0.99554
4008	LMO7	0.388592	5.51466	4.69236	0.070722	0.99554
81603	TRIM8	0.250329	5.83882	4.69179	0.0707351	0.99554
101926888	RALY-AS1	0.710579	0.907475	4.69143	0.0707433	0.99554
4172	MCM3	-0.166781	7.97004	4.6872	0.0708416	0.99554
10551	AGR2	-0.200134	7.7829	4.68402	0.0709154	0.99554
4185	ADAM11	-0.41845	2.5769	4.68366	0.0709239	0.99554
132671	SPATA18	0.476706	4.0434	4.68111	0.070983	0.99554
360023	ZBTB41	-0.182662	6.43285	4.67723	0.0710735	0.99554
375248	ANKRD36	-0.434327	2.65183	4.67041	0.0712328	0.99554
64073	C19orf33	0.408504	3.82137	4.66389	0.0713853	0.99554
971	CD72	-1.96166	-0.83535	4.66031	0.0714694	0.99554
5184	PEPD	0.296651	4.63641	4.65977	0.0714822	0.99554
7696	NA	-0.851635	1.1867	4.65846	0.071513	0.99554
340156	MYLK4	-0.855753	0.68213	4.65833	0.071516	0.99554
51741	WWOX	0.196836	5.92725	4.65017	0.0717083	0.99554
23563	CHST5	2.17242	-1.49019	4.64507	0.0718286	0.99554
83955	NA	1.07306	-0.21294	4.64472	0.0718369	0.99554
9123	SLC16A3	-0.334283	3.84211	4.6403	0.0719415	0.99554
100130093	NA	-0.80396	0.929036	4.6398	0.0719535	0.99554
196527	ANO6	0.367751	6.91259	4.63696	0.0720208	0.99554
93594	TBC1D31	-0.350939	4.12283	4.6362	0.0720389	0.99554
101805492	CASC9	-0.740662	1.90364	4.634	0.0720912	0.99554
774	CACNA1B	2.00362	-1.56905	4.63273	0.0721214	0.99554
58191	CXCL16	0.223806	5.36487	4.6322	0.072134	0.99554
64747	MFSD1	0.282186	6.4068	4.6241	0.072327	0.99554
6865	TACR2	-1.65592	-1.28188	4.6191	0.0724464	0.99554
7274	TTPA	-1.65592	-1.28188	4.6191	0.0724464	0.99554
3636	INPPL1	0.169483	8.21383	4.61807	0.0724712	0.99554
79805	VASH2	-0.481015	2.25992	4.61668	0.0725043	0.99554
4174	MCM5	-0.212402	6.38144	4.61651	0.0725083	0.99554
7784	ZP3	0.335003	3.43498	4.61402	0.0725681	0.99554
26150	RIBC2	-0.55416	2.23265	4.61244	0.072606	0.99554
64393	ZMAT3	0.403488	5.41767	4.60897	0.0726894	0.99554
55072	RNF31	0.211347	6.20155	4.60792	0.0727145	0.99554
3752	KCND3	0.913923	0.0952464	4.60649	0.0727489	0.99554
112399	EGLN3	0.4758	5.71116	4.60465	0.0727933	0.99554
158381	ATP8B5P	1.53983	-1.21475	4.60384	0.0728128	0.99554
101928780	NA	0.786904	0.217002	4.60092	0.072883	0.99554
100133669	NA	1.54246	-1.21468	4.59895	0.0729306	0.99554
79673	ZNF329	-0.322932	3.65805	4.59682	0.0729821	0.99554
57580	PREX1	0.511218	9.41618	4.59158	0.0731088	0.99554
5796	PTPRK	0.22232	8.09306	4.58801	0.0731953	0.99554
3936	LCP1	0.217677	5.58311	4.58735	0.0732113	0.99554
1072	CFL1	0.161814	10.4482	4.58489	0.073271	0.99554
9473	THEMIS2	-1.39005	-1.15661	4.58125	0.0733596	0.99554
2289	FKBP5	-0.282041	5.69921	4.58053	0.0733771	0.99554
8310	ACOX3	0.24818	4.50086	4.57739	0.0734537	0.99554
100130238	NA	-1.03402	0.0120755	4.5732	0.0735557	0.99554
116028	RMI2	-0.190711	6.31807	4.56896	0.0736594	0.99554
101928687	LNCAROD	0.294765	5.77887	4.56786	0.0736863	0.99554
101929147	WARS2-AS1	-0.788226	0.913643	4.565	0.0737563	0.99554
55262	TRAPPC14	0.288033	5.09771	4.56494	0.0737579	0.99554
114785	MBD6	0.202136	6.81494	4.56288	0.0738083	0.99554
5673	PSG5	1.56745	-0.121703	4.56046	0.0738678	0.99554
441355	MIR2052HG	1.30129	-0.783707	4.55488	0.0740049	0.99554
203562	TMEM31	-1.28912	-0.494097	4.55168	0.0740838	0.99554
63826	SRR	-0.3004	4.7432	4.54864	0.0741588	0.99554
51691	LSM8	-0.218925	5.43981	4.54688	0.0742022	0.99554
9668	ZNF432	-0.469194	2.05639	4.54487	0.0742518	0.99554
101928812	LINC02696	1.54135	-1.21453	4.53722	0.0744413	0.99554
55311	ZNF444	0.282236	4.42451	4.53515	0.0744929	0.99554
101929327	NA	1.57646	-0.983472	4.53159	0.0745813	0.99554
56111	PCDHGA4	-0.697377	1.08833	4.53008	0.0746187	0.99554
5121	PCP4	-0.482135	4.01301	4.52809	0.0746684	0.99554
7019	TFAM	-0.191814	6.41121	4.52728	0.0746887	0.99554
57508	INTS2	-0.238449	7.26747	4.52109	0.074843	0.99554
10597	TRAPPC2B	-0.659128	1.1388	4.51745	0.0749341	0.99554
201965	RWDD4	-0.409342	2.86184	4.51735	0.0749367	0.99554
23650	TRIM29	0.941935	0.848679	4.515	0.0749955	0.99554
87769	GGACT	-0.910644	1.25497	4.51461	0.0750052	0.99554
84189	SLITRK6	-0.281947	5.18475	4.51184	0.0750746	0.99554
54344	DPM3	0.31973	3.56018	4.50926	0.0751395	0.99554
25915	NDUFAF3	0.309876	3.80654	4.50596	0.0752224	0.99554
1993	ELAVL2	-0.623049	1.79347	4.50542	0.0752361	0.99554
6432	SRSF7	-0.185488	7.73534	4.50481	0.0752515	0.99554
56999	ADAMTS9	0.306132	3.71036	4.49942	0.0753872	0.99554
3344	FOXN2	-0.214184	5.14673	4.49439	0.0755144	0.99554
1087	CEACAM7	1.46554	-0.415903	4.48668	0.0757097	0.99554
56204	FAM214A	0.243393	6.53814	4.48507	0.0757506	0.99554
388588	SMIM1	-0.957427	-0.218666	4.47838	0.0759208	0.99554
126353	MISP	0.171195	6.68891	4.47691	0.0759583	0.99554
284443	ZNF493	-0.474425	2.98298	4.47653	0.0759679	0.99554
7171	TPM4	0.193858	10.1968	4.47181	0.0760885	0.99554
6941	TCF19	-0.265244	5.92719	4.46914	0.0761567	0.99554
645431	NA	0.448271	3.57973	4.46838	0.0761761	0.99554
100505826	STK4-DT	-1.01255	-0.187583	4.46658	0.0762223	0.99554
116983	ACAP3	0.229912	6.14414	4.46608	0.076235	0.99554
5819	NECTIN2	0.170975	7.50805	4.45808	0.0764404	0.99554
199731	CADM4	0.318871	3.63116	4.45362	0.0765551	0.99554
57486	NLN	-0.19148	6.47145	4.45048	0.0766362	0.99554
117143	TADA1	-0.231024	4.88876	4.44913	0.0766709	0.99554
3912	LAMB1	0.391458	6.13729	4.44823	0.0766942	0.99554
25914	RTTN	-0.37941	3.28289	4.44766	0.076709	0.99554
642441	NA	1.30401	-0.783283	4.4427	0.0768372	0.99554
83959	SLC4A11	0.363322	3.20458	4.43774	0.076966	0.99554
200894	ARL13B	-0.278431	4.52667	4.43621	0.0770056	0.99554
79183	TTPAL	-0.196158	5.66987	4.4337	0.0770708	0.99554
64094	SMOC2	-0.740053	1.11301	4.4312	0.0771358	0.99554
8794	TNFRSF10C	0.663052	2.78478	4.42514	0.0772939	0.99554
101927821	LINC01425	1.39375	-0.737162	4.42241	0.0773652	0.99554
692212	SNORD99	1.39375	-0.737162	4.42241	0.0773652	0.99554
100289361	NA	-0.893012	0.163472	4.42141	0.0773912	0.99554
5985	RFC5	-0.172453	6.28254	4.41563	0.0775425	0.99554
7307	U2AF1	-1.08243	-0.612767	4.41327	0.0776044	0.99554
79856	SNX22	-0.519839	1.8915	4.40971	0.077698	0.99554
57562	CEP126	-0.618602	1.70628	4.40685	0.0777731	0.99554
9585	KIF20B	-0.194288	6.00114	4.40376	0.0778545	0.99554
100506436	NA	-1.11263	-0.741856	4.39835	0.0779973	0.99554
100287616	LOXL1-AS1	0.315013	4.27236	4.3944	0.0781018	0.99554
9829	DNAJC6	-0.284797	4.94246	4.39341	0.0781281	0.99554
203228	C9orf72	-0.654454	2.51671	4.39143	0.0781805	0.99554
3693	ITGB5	0.382689	6.88817	4.38722	0.0782921	0.99554
26166	RGS22	0.867477	-0.152615	4.38412	0.0783746	0.99554
55558	PLXNA3	0.192517	6.96572	4.3836	0.0783883	0.99554
83695	RHNO1	-0.1836	5.902	4.38085	0.0784616	0.99554
9662	CEP135	-0.257453	4.7863	4.37797	0.0785382	0.99554
23398	PPWD1	-0.23442	5.22623	4.37094	0.0787261	0.99554
4643	MYO1E	0.296406	4.65792	4.36983	0.0787557	0.99554
285220	EPHA6	-0.582011	3.59723	4.36969	0.0787594	0.99554
1474	CST6	-1.74169	-1.57131	4.36926	0.0787711	0.99554
10614	HEXIM1	0.200784	6.32836	4.36836	0.0787951	0.99554
2530	FUT8	0.174956	7.38839	4.36646	0.0788461	0.99554
9966	TNFSF15	1.17742	2.73216	4.36509	0.0788828	0.99554
4586	MUC5AC	2.80473	-0.451716	4.35953	0.079032	0.99554
167359	NIM1K	-1.52106	-1.3489	4.35741	0.0790892	0.99554
63914	SMIM8	-1.52106	-1.3489	4.35741	0.0790892	0.99554
1917	EEF1A2	0.180884	10.0337	4.35739	0.0790898	0.99554
1290	COL5A2	0.520957	2.11724	4.35213	0.0792315	0.99554
60	ACTB	0.179899	12.2695	4.35091	0.0792645	0.99554
5869	RAB5B	0.201894	8.02059	4.35026	0.0792818	0.99554
26548	ITGB1BP2	-0.661041	0.841266	4.34932	0.0793072	0.99554
440603	BCL2L15	-1.12466	-0.45699	4.34793	0.0793449	0.99554
440145	MZT1	-0.220284	5.04514	4.34731	0.0793618	0.99554
101927262	NA	0.935613	-0.380091	4.34267	0.0794873	0.99554
9960	USP3	0.216391	5.82809	4.34235	0.0794961	0.99554
646329	NA	1.12079	-0.608601	4.34163	0.0795154	0.99554
54622	ARL15	0.359691	4.39747	4.33967	0.0795686	0.99554
285696	NA	1.08524	-0.0357235	4.33925	0.0795802	0.99554
57650	CIP2A	-0.201101	5.87863	4.33432	0.0797139	0.99554
22924	MAPRE3	0.306632	4.46042	4.33238	0.0797669	0.99554
10611	PDLIM5	0.251308	6.17182	4.33101	0.0798043	0.99554
6653	SORL1	0.265671	4.66042	4.32906	0.0798572	0.99554
1471	CST3	0.19406	6.75557	4.32804	0.0798851	0.99554
9063	PIAS2	-0.29466	4.21354	4.3265	0.0799273	0.99554
2078	ERG	-0.643816	0.871228	4.32586	0.0799448	0.99554
64091	POPDC2	-0.942644	0.0380024	4.32535	0.0799586	0.99554
10342	TFG	0.171233	7.23872	4.32512	0.0799649	0.99554
257415	FAM133B	-0.238168	4.58061	4.32392	0.0799977	0.99554
114815	SORCS1	-0.819414	0.613889	4.32263	0.080033	0.99554
9411	ARHGAP29	0.254784	4.9816	4.32168	0.0800589	0.99554
50509	COL5A3	-1.74272	-1.57116	4.32066	0.080087	0.99554
56241	SUSD2	0.328634	4.16484	4.316	0.0802147	0.99554
4026	LPP	0.268779	6.243	4.31561	0.0802253	0.99554
100130987	NA	0.780363	0.833919	4.31454	0.0802547	0.99554
51203	NUSAP1	-0.196624	7.14513	4.31139	0.0803412	0.99554
347475	CCDC160	2.1704	-1.49078	4.30968	0.0803883	0.99554
92291	CAPN13	0.568362	3.96158	4.30834	0.0804252	0.99554
101927789	NA	0.557407	1.7805	4.30708	0.0804599	0.99554
54849	DEF8	0.202119	6.18907	4.30655	0.0804746	0.99554
5547	PRCP	-0.208933	5.53767	4.30601	0.0804893	0.99554
29093	MRPL22	-0.214667	5.26804	4.30567	0.0804986	0.99554
54069	MIS18A	-0.259124	4.72497	4.30436	0.0805347	0.99554
57509	MTUS1	0.250061	6.48157	4.30038	0.0806446	0.99554
51454	GULP1	0.353551	5.30719	4.2996	0.0806662	0.99554
84225	ZMYND15	-1.102	0.68105	4.29808	0.0807084	0.99554
54972	TMEM132A	0.162903	7.29391	4.29747	0.0807251	0.99554
80745	THUMPD2	-0.311645	3.66663	4.29702	0.0807375	0.99554
283	ANG	-1.15904	-0.316667	4.29431	0.0808128	0.99554
5717	PSMD11	0.204551	6.92825	4.29282	0.0808541	0.99554
284252	KCTD1	0.283922	4.23172	4.29269	0.0808576	0.99554
84612	PARD6B	0.200323	7.09175	4.28464	0.0810814	0.99554
10172	ZNF256	-0.460134	2.19218	4.28436	0.0810892	0.99554
102723913	NA	-0.778216	0.365829	4.27938	0.081228	0.99554
390916	NUDT19	0.202695	5.27943	4.27923	0.081232	0.99554
1787	TRDMT1	-0.581277	1.85591	4.2773	0.0812861	0.99554
9232	PTTG1	-0.206743	5.72537	4.27459	0.0813616	0.99554
84033	OBSCN	-0.28685	4.26983	4.27438	0.0813677	0.99554
7561	ZNF14	-0.446856	3.26507	4.2727	0.0814146	0.99554
23468	CBX5	-0.197333	8.59302	4.27145	0.0814497	0.99554
1340	COX6B1	0.166916	7.05093	4.27139	0.0814512	0.99554
100996485	PITX1-AS1	1.06101	-0.415135	4.2692	0.0815126	0.99554
1535	CYBA	0.202967	6.35394	4.26731	0.0815656	0.99554
3976	LIF	0.677893	1.77289	4.26561	0.0816134	0.99554
84318	CCDC77	-0.365326	2.93431	4.26519	0.0816251	0.99554
4605	MYBL2	-0.173553	8.14088	4.26462	0.0816412	0.99554
7031	TFF1	0.327708	8.28139	4.2562	0.0818781	0.99554
26154	ABCA12	-0.484282	4.5352	4.25262	0.0819792	0.99554
11138	TBC1D8	0.437431	4.69934	4.2505	0.0820394	0.99554
1545	CYP1B1	0.558923	7.74224	4.25026	0.0820459	0.99554
6675	UAP1	-0.227101	5.04509	4.25007	0.0820514	0.99554
63979	FIGNL1	-0.196132	5.81401	4.24949	0.0820677	0.99554
8733	GPAA1	0.208734	6.69339	4.24948	0.082068	0.99554
192683	SCAMP5	0.182202	5.74265	4.24701	0.0821379	0.99554
140691	TRIM69	-0.892211	0.0897039	4.234	0.0825078	0.99554
7091	TLE4	0.211319	5.0589	4.23358	0.0825196	0.99554
83990	BRIP1	-0.209868	8.99916	4.22777	0.0826856	0.99554
222962	SLC29A4	0.400512	3.3651	4.22258	0.0828341	0.99554
4430	MYO1B	0.480292	9.2482	4.2211	0.0828764	0.99554
147015	DHRS13	-0.31414	4.10692	4.21996	0.082909	0.99554
10188	TNK2	0.208004	5.70697	4.21925	0.0829294	0.99554
65055	REEP1	0.380199	4.08875	4.21825	0.0829582	0.99554
727936	GXYLT2	-0.558695	1.406	4.21678	0.0830004	0.99554
6988	TCTA	0.241222	4.65249	4.21422	0.0830741	0.99554
81631	MAP1LC3B	0.185272	7.00566	4.21375	0.0830875	0.99554
84255	SLC37A3	0.296448	5.10952	4.2102	0.0831898	0.99554
253558	LCLAT1	-0.269486	5.00454	4.20473	0.0833477	0.99554
6386	SDCBP	0.264155	6.7859	4.20344	0.0833848	0.99554
3099	HK2	0.293948	6.81418	4.20177	0.0834331	0.99554
379025	PSMA3-AS1	-0.183015	5.63138	4.20142	0.0834434	0.99554
100873954	NA	-0.605676	1.03816	4.2004	0.0834727	0.99554
374654	KIF7	-0.714107	0.870993	4.19886	0.0835175	0.99554
54993	ZSCAN2	0.354307	3.32253	4.19777	0.0835489	0.99554
80833	APOL3	1.22024	-0.983683	4.19086	0.0837496	0.99554
647042	GOLGA6L10	-0.708879	0.596498	4.18966	0.0837846	0.99554
7351	UCP2	0.233959	6.49195	4.18959	0.0837866	0.99554
6867	TACC1	0.166038	7.43074	4.18741	0.0838501	0.99554
9026	HIP1R	0.183401	6.15722	4.18242	0.0839957	0.99554
100510707	NA	-1.06235	-0.494517	4.17714	0.0841499	0.99554
84216	TMEM117	-0.381412	3.35881	4.17651	0.0841684	0.99554
84446	BRSK1	-0.773047	0.78058	4.17506	0.0842108	0.99554
101927002	NA	0.642411	0.833388	4.17439	0.0842305	0.99554
79145	CHCHD7	-0.325974	3.92971	4.17384	0.0842466	0.99554
101927910	NA	-0.478695	2.43556	4.17148	0.0843157	0.99554
9107	MTMR6	0.223661	6.24501	4.1702	0.0843534	0.99554
9069	CLDN12	-0.219345	5.02436	4.16905	0.084387	0.99554
29946	SERTAD3	-0.186893	5.52622	4.16894	0.0843904	0.99554
57722	IGDCC4	-1.52239	-1.3492	4.16833	0.0844082	0.99554
693201	MIR616	-1.52239	-1.3492	4.16833	0.0844082	0.99554
57149	LYRM1	0.250867	4.9926	4.16675	0.0844548	0.99554
51719	CAB39	0.263741	6.88852	4.16565	0.0844871	0.99554
4836	NMT1	0.163441	6.91192	4.1616	0.0846065	0.99554
55593	OTUD5	0.197423	5.77546	4.16099	0.0846244	0.99554
163227	ZNF100	-0.324064	4.0509	4.15889	0.0846863	0.99554
57198	ATP8B2	0.278299	6.71942	4.1539	0.0848339	0.99554
282679	AQP11	-0.531208	1.54158	4.15169	0.0848991	0.99554
5873	RAB27A	-0.310023	3.60368	4.15015	0.0849448	0.99554
182	JAG1	0.384914	3.84169	4.14794	0.0850104	0.99554
54830	NUP62CL	-0.610765	1.89248	4.14737	0.0850274	0.99554
26227	PHGDH	-0.288614	5.57672	4.14588	0.0850715	0.99554
728340	GTF2H2	-0.378808	3.08793	4.14587	0.0850718	0.99554
728340	GTF2H2C	-0.378808	3.08793	4.14587	0.0850718	0.99554
286467	FIRRE	-0.651274	1.89921	4.14551	0.0850826	0.99554
6331	SCN5A	-1.63187	-0.613592	4.14548	0.0850833	0.99554
55625	ZDHHC7	0.295989	7.85185	4.1418	0.0851927	0.99554
8633	UNC5C	-0.455288	2.75934	4.14042	0.0852338	0.99554
610	HCN2	0.226132	5.26763	4.13866	0.0852862	0.99554
5933	RBL1	-0.210359	5.18111	4.13161	0.0854967	0.99554
11107	PRDM5	-0.555656	1.32209	4.1286	0.0855868	0.99554
1312	COMT	0.199006	6.93174	4.12098	0.0858155	0.99554
90589	ZNF625	-1.47534	-0.532621	4.12057	0.0858279	0.99554
744	MPPED2	-0.458203	2.14431	4.11937	0.0858639	0.99554
101928588	NA	-0.74502	0.665443	4.1178	0.0859111	0.99554
140831	ZSWIM3	-0.440529	2.91642	4.11768	0.0859148	0.99554
124404	SEPTIN12	-2.05348	-1.41986	4.11747	0.085921	0.99554
26994	RNF11	0.168156	6.98967	4.11487	0.0859994	0.99554
54535	CCHCR1	-0.300268	4.1656	4.11286	0.08606	0.99554
340120	ANKRD34B	0.499915	4.13116	4.11277	0.0860626	0.99554
79007	DBNDD1	0.195936	7.18212	4.11196	0.0860872	0.99554
55304	SPTLC3	-0.640438	0.871589	4.1103	0.0861372	0.99554
3628	INPP1	0.683417	0.963412	4.10834	0.0861966	0.99554
5099	PCDH7	-0.333472	5.4991	4.10607	0.0862652	0.99554
23030	KDM4B	0.275772	4.98868	4.10586	0.0862714	0.99554
25805	BAMBI	0.376545	8.78381	4.10551	0.0862821	0.99554
1948	EFNB2	0.254893	6.68605	4.10545	0.086284	0.99554
3899	AFF3	0.442998	3.31715	4.10534	0.0862872	0.99554
83937	RASSF4	-1.09905	-0.349777	4.10414	0.0863234	0.99554
9133	CCNB2	-0.243269	6.02505	4.1017	0.0863975	0.99554
159686	CFAP58	1.6468	-1.4163	4.10134	0.0864085	0.99554
101927957	LINC01572	-1.99322	-1.09809	4.10028	0.0864406	0.99554
140738	TMEM37	-0.657526	1.68985	4.09688	0.086544	0.99554
9675	TTI1	-0.177419	5.74312	4.0965	0.0865556	0.99554
390937	ERFL	-1.89444	-1.15732	4.09492	0.0866036	0.99554
65083	NOL6	0.168382	6.1224	4.09288	0.0866656	0.99554
4751	NEK2	-0.259966	4.60753	4.08818	0.086809	0.99554
9013	TAF1C	0.195441	6.61851	4.08174	0.0870058	0.99554
100335030	NA	-1.32552	-0.787427	4.07873	0.0870979	0.99554
80318	GKAP1	-0.37923	2.94073	4.07634	0.0871714	0.99554
6748	SSR4	0.204909	7.45566	4.07522	0.0872056	0.99554
4284	MIP	1.64622	-1.41622	4.07453	0.0872267	0.99554
25829	TMEM184B	0.182784	6.20144	4.07339	0.087262	0.99554
7517	XRCC3	-0.248171	5.52322	4.07311	0.0872704	0.99554
80010	RMI1	-0.197436	5.48481	4.07249	0.0872895	0.99554
533	ATP6V0B	0.226685	6.07997	4.06979	0.0873725	0.99554
50489	CD207	-1.52057	-1.34898	4.06941	0.0873843	0.99554
57192	MCOLN1	0.350313	3.35451	4.06871	0.0874058	0.99554
10425	ARIH2	0.170828	6.06508	4.05957	0.0876881	0.99554
27022	FOXD3	0.85313	-0.00906848	4.05932	0.087696	0.99554
55247	NEIL3	-0.307694	3.57743	4.05486	0.0878341	0.99554
537	ATP6AP1	0.162937	8.28162	4.05422	0.0878538	0.99554
102723334	NA	1.53735	-1.21526	4.05249	0.0879076	0.99554
140689	CBLN4	0.743443	0.307601	4.0514	0.0879415	0.99554
3716	JAK1	0.304001	8.13799	4.04974	0.0879931	0.99554
10904	BLCAP	0.219535	6.01138	4.0481	0.0880439	0.99554
10153	CEBPZ	-0.178281	6.55068	4.04618	0.0881039	0.99554
11151	CORO1A	0.175634	5.76551	4.04491	0.0881432	0.99554
32	ACACB	-0.333462	3.51064	4.04362	0.0881836	0.99554
3860	KRT13	1.18796	2.21022	4.0432	0.0881965	0.99554
11059	WWP1	0.188509	8.40088	4.04096	0.0882664	0.99554
7482	WNT2B	-1.28464	1.27619	4.03975	0.0883044	0.99554
51043	ZBTB7B	0.190376	6.46698	4.03842	0.0883459	0.99554
51527	GSKIP	0.184605	6.37982	4.0374	0.0883777	0.99554
63922	CHTF18	-0.192607	5.49543	4.0353	0.0884434	0.99554
102723696	NA	1.22222	-0.983541	4.03521	0.0884462	0.99554
148645	NA	-0.678155	0.811696	4.03341	0.0885026	0.99554
3855	KRT7	0.545845	2.86958	4.03042	0.0885963	0.99554
4488	MSX2	0.295431	6.03162	4.02981	0.0886154	0.99554
535	ATP6V0A1	0.196566	5.65528	4.02969	0.0886193	0.99554
84254	CAMKK1	-0.443533	2.20912	4.02916	0.0886358	0.99554
100507431	NA	-0.663949	1.03822	4.02351	0.0888137	0.99554
6484	ST3GAL4	0.387792	6.67632	4.01516	0.089077	0.99554
824	CAPN2	0.468781	3.64086	4.01397	0.0891146	0.99554
5516	PPP2CB	0.214735	5.88555	4.01144	0.0891946	0.99554
4835	NQO2	-0.219429	4.79057	4.01033	0.0892299	0.99554
2218	FKTN	-0.194338	5.80121	4.00825	0.0892957	0.99554
30	ACAA1	0.178284	6.00219	4.00726	0.0893272	0.99554
81566	CSRNP2	0.191928	5.72898	4.0061	0.0893639	0.99554
56952	PRTFDC1	-0.445911	2.10773	4.00585	0.0893718	0.99554
83640	RAMAC	0.279505	4.27206	4.00485	0.0894036	0.99554
57613	FAM234B	-0.169554	6.42054	4.00231	0.0894842	0.99554
93349	SP140L	-0.413365	4.01273	4.00055	0.0895401	0.99554
113130	CDCA5	-0.220122	6.6736	3.99771	0.0896307	0.99554
8992	ATP6V0E1	0.21543	7.85725	3.99322	0.0897739	0.99554
79065	ATG9A	0.169824	5.9324	3.99272	0.0897899	0.99554
51574	LARP7	-0.177883	5.6674	3.99231	0.0898029	0.99554
100131211	NEMP2	-0.372195	3.03599	3.98849	0.0899252	0.99554
338699	ANKRD42	0.239087	4.42974	3.98447	0.090054	0.99554
317716	BPIFA4P	1.21493	2.52636	3.98148	0.09015	0.99554
9572	NR1D1	0.455585	2.44957	3.97973	0.0902064	0.99554
80315	CPEB4	0.241366	5.05085	3.97601	0.0903261	0.99554
5782	PTPN12	0.202585	7.42158	3.97592	0.0903287	0.99554
57718	PPP4R4	-0.583995	1.02499	3.9744	0.090378	0.99554
1592	CYP26A1	1.1043	0.567894	3.97429	0.0903815	0.99554
22806	IKZF3	1.22366	-0.983327	3.97351	0.0904066	0.99554
149351	NA	-1.39228	-1.15675	3.97214	0.0904506	0.99554
84734	FAM167B	-1.39228	-1.15675	3.97214	0.0904506	0.99554
400720	ZNF772	-0.285037	3.86663	3.97098	0.0904881	0.99554
101928349	NA	2.15898	-1.15353	3.97017	0.0905143	0.99554
200844	CFAP20DC	-0.500229	1.99063	3.96835	0.0905731	0.99554
100506036	CNNM3-DT	0.702124	0.491695	3.96797	0.0905854	0.99554
5238	PGM3	0.213021	6.33522	3.96671	0.0906261	0.99554
79780	CCDC82	-0.440521	2.0888	3.96234	0.0907676	0.99554
10780	ZNF234	-0.365358	3.03228	3.96021	0.0908368	0.99554
51806	CALML5	0.410933	2.95168	3.95804	0.0909071	0.99554
23654	PLXNB2	0.152792	8.14506	3.95186	0.0911082	0.99554
3161	HMMR	-0.171613	6.29801	3.95117	0.0911308	0.99554
378708	CENPS	-0.630199	0.94297	3.95101	0.0911361	0.99554
11113	CIT	-0.222662	6.19434	3.9504	0.091156	0.99554
101929479	NA	0.688009	0.529733	3.94917	0.0911959	0.99554
54987	CZIB	0.230055	4.52544	3.94818	0.0912283	0.99554
28982	FLVCR1	-0.294328	4.11037	3.9468	0.0912734	0.99554
439921	MXRA7	0.516825	3.09073	3.94557	0.0913135	0.99554
10371	SEMA3A	1.02335	-0.15235	3.94284	0.091403	0.99554
54887	UHRF1BP1	-0.178347	5.80918	3.93842	0.0915476	0.99554
729375	NA	0.570902	2.86626	3.93825	0.0915532	0.99554
100124700	HOTAIR	0.272561	4.0729	3.93731	0.091584	0.99554
51586	MED15	0.175531	5.71191	3.93719	0.091588	0.99554
6434	TRA2B	-0.189298	7.7102	3.93626	0.0916187	0.99554
83448	PUS7L	-0.236391	4.69593	3.93521	0.091653	0.99554
11198	SUPT16H	-0.154031	9.07604	3.93409	0.0916898	0.99554
10458	BAIAP2	0.205201	5.16059	3.93372	0.0917021	0.99554
100129196	MATN1-AS1	-0.76257	0.632042	3.93252	0.0917416	0.99554
100499227	NA	-1.11142	-0.741573	3.93159	0.0917719	0.99554
27289	RND1	1.29392	3.16488	3.93158	0.0917723	0.99554
91975	ZNF300	-0.851423	0.211405	3.92967	0.0918354	0.99554
283335	TNS2-AS1	-0.361766	3.82332	3.92273	0.0920642	0.99554
2258	FGF13	0.345509	3.51922	3.92184	0.0920937	0.99554
79679	VTCN1	0.736475	3.08899	3.9199	0.0921579	0.99554
11277	TREX1	0.392712	2.52168	3.91875	0.0921957	0.99554
339448	C1orf174	0.266932	4.21428	3.91749	0.0922376	0.99554
10038	PARP2	-0.18398	6.19289	3.91671	0.0922635	0.99554
2990	GUSB	0.235819	7.20146	3.91652	0.0922697	0.99554
1795	DOCK3	-0.448015	2.83306	3.91493	0.0923226	0.99554
22931	RAB18	0.18688	7.45329	3.91491	0.0923232	0.99554
80351	TNKS2	0.18939	6.93011	3.91403	0.0923523	0.99554
388165	UBE2Q2P1	-0.936735	0.0391293	3.91336	0.0923744	0.99554
733	C8G	0.74432	0.19364	3.90856	0.0925341	0.99554
101928291	NA	-0.965734	-0.315642	3.90677	0.0925938	0.99554
100288637	NA	-0.322122	3.63659	3.90321	0.0927122	0.99554
55096	EBLN2	-0.653593	0.795614	3.89961	0.0928325	0.99554
282974	STK32C	0.364559	2.75287	3.89629	0.0929435	0.99554
57179	KIAA1191	0.166679	7.47061	3.89584	0.0929588	0.99554
112942	CFAP36	-0.230768	5.26528	3.89581	0.0929597	0.99554
55884	WSB2	0.382643	6.61026	3.89386	0.093025	0.99554
7317	UBA1	0.152187	9.06516	3.89248	0.0930711	0.99554
1837	DTNA	0.250983	7.0225	3.89148	0.0931049	0.99554
101929760	PIK3IP1-DT	1.23605	-1.15359	3.89113	0.0931164	0.99554
115294	PCMTD1	0.223895	4.837	3.88905	0.0931865	0.99554
23677	SH3BP4	0.220601	6.30878	3.8886	0.0932016	0.99554
22881	ANKRD6	-0.417083	3.00662	3.88721	0.0932483	0.99554
54059	YBEY	0.34987	3.26535	3.88713	0.0932508	0.99554
146330	FBXL16	0.189281	5.31291	3.88492	0.0933253	0.99554
5236	PGM1	-0.477645	2.0634	3.88411	0.0933524	0.99554
400986	ANKRD36C	-0.637543	2.39284	3.87799	0.0935589	0.99554
102724517	NA	0.787812	0.674321	3.87579	0.0936334	0.99554
11012	KLK11	-0.557545	2.33041	3.87578	0.0936336	0.99554
9134	CCNE2	-0.185431	6.25136	3.87429	0.0936839	0.99554
11099	PTPN21	0.214425	5.50418	3.87144	0.0937804	0.99554
9650	MTFR1	0.188816	5.94351	3.87073	0.0938046	0.99554
171392	ZNF675	-0.253662	4.32449	3.87009	0.0938263	0.99554
161742	SPRED1	0.332743	3.24508	3.86604	0.0939637	0.99554
84309	NUDT16L1	0.210606	4.90043	3.86537	0.0939867	0.99554
84518	CNFN	-0.845995	0.344849	3.86144	0.0941202	0.99554
51115	RMDN1	-0.24039	6.57941	3.85751	0.0942543	0.99554
9014	TAF1B	-0.212587	5.19888	3.85666	0.094283	0.99554
80003	PCNX2	-0.29267	4.17175	3.85625	0.0942972	0.99554
10202	DHRS2	0.40918	5.81022	3.85429	0.094364	0.99554
3679	ITGA7	-0.510705	1.83368	3.85153	0.0944585	0.99554
10293	TRAIP	-0.32787	3.90832	3.85131	0.0944659	0.99554
8434	RECK	-0.62522	1.01089	3.85102	0.0944761	0.99554
51686	OAZ3	-0.48667	1.67385	3.8495	0.094528	0.99554
342132	ZNF774	-0.515209	1.648	3.84844	0.0945644	0.99554
100506606	NA	-1.00653	-0.654218	3.84706	0.0946116	0.99554
130399	ACVR1C	-1.00653	-0.654218	3.84706	0.0946116	0.99554
85437	ZCRB1	-0.186725	5.4954	3.84658	0.0946279	0.99554
101927423	PANO1	0.668853	0.77193	3.84654	0.0946293	0.99554
5493	PPL	0.215792	7.37021	3.84548	0.0946659	0.99554
730101	NA	-0.415819	3.2723	3.84366	0.0947283	0.99554
150384	GTSE1-DT	-0.721681	0.447073	3.84201	0.094785	0.99554
5932	RBBP8	-0.215229	6.13693	3.83939	0.0948751	0.99554
9446	GSTO1	-0.232258	5.07864	3.83844	0.0949077	0.99554
89795	NAV3	-0.844811	-0.187522	3.83787	0.0949274	0.99554
55695	NSUN5	-0.211857	4.89789	3.83569	0.0950025	0.99554
6751	SSTR1	1.47852	-1.49078	3.83493	0.0950286	0.99554
79071	ELOVL6	-0.199689	6.03822	3.83344	0.0950801	0.99554
169270	ZNF596	-0.320971	3.57493	3.83216	0.0951245	0.99554
100507217	NA	-0.180762	5.85799	3.83082	0.0951707	0.99554
196074	METTL15	-0.301298	3.78353	3.83002	0.0951984	0.99554
10938	EHD1	0.177397	6.10235	3.82436	0.0953943	0.99554
29796	UQCR10	0.166995	6.28059	3.82227	0.0954667	0.99554
4548	MTR	-0.232044	5.92822	3.82169	0.095487	0.99554
401261	NA	-0.575044	0.98482	3.82144	0.0954957	0.99554
51182	HSPA14	-0.215154	6.18158	3.82134	0.095499	0.99554
5577	PRKAR2B	-0.226725	5.33409	3.81907	0.0955779	0.99554
79949	PLEKHS1	0.481304	5.44227	3.81284	0.095795	0.99554
55790	CSGALNACT1	0.934268	1.4153	3.81267	0.0958008	0.99554
4724	NDUFS4	-0.242802	5.11417	3.81251	0.0958065	0.99554
1465	CSRP1	0.258027	8.56236	3.81135	0.095847	0.99554
4010	LMX1B	0.224646	6.60113	3.80864	0.0959416	0.99554
57488	ESYT2	0.169667	7.87585	3.80523	0.0960609	0.99554
2324	FLT4	-0.845506	-0.187385	3.80319	0.0961322	0.99554
694	BTG1	0.17451	7.13502	3.80146	0.096193	0.99554
10765	KDM5B	0.181211	8.49168	3.79983	0.0962502	0.99554
83852	SETDB2	-0.262131	4.15909	3.79557	0.0963996	0.99554
27085	MTBP	-0.322841	3.58291	3.79263	0.0965032	0.99554
5265	SERPINA1	-0.845523	1.40343	3.79217	0.0965196	0.99554
4683	NBN	-0.155336	8.00179	3.78875	0.0966399	0.99554
3417	IDH1	0.199451	7.67695	3.78614	0.0967322	0.99554
431705	ASTL	-1.27556	2.17536	3.78537	0.0967595	0.99554
54101	RIPK4	0.442854	3.77966	3.78211	0.0968746	0.99554
145757	NA	0.513303	3.46065	3.78172	0.0968887	0.99554
102724699	LINC02043	-1.39181	-1.15682	3.78114	0.0969091	0.99554
10149	ADGRG2	0.725552	0.549196	3.77973	0.096959	0.99554
8609	KLF7	0.257898	4.58132	3.77808	0.0970175	0.99554
84552	PARD6G	-0.528605	2.08674	3.77242	0.0972186	0.99554
6829	SUPT5H	0.175954	7.23808	3.76962	0.0973184	0.99554
5875	RABGGTA	0.194267	5.23166	3.76864	0.0973531	0.99554
9467	SH3BP5	0.291014	7.5942	3.76705	0.0974098	0.99554
101929047	NA	-1.15037	-0.883822	3.76644	0.0974319	0.99554
5141	PDE4A	-0.448748	1.94227	3.76517	0.0974769	0.99554
79831	KDM8	-0.578759	1.87008	3.76333	0.0975428	0.99554
55151	TMEM38B	-0.184246	5.44928	3.75905	0.0976959	0.99554
84695	LOXL3	-0.385799	2.79486	3.75831	0.0977224	0.99554
6610	SMPD2	0.282771	3.74107	3.75761	0.0977474	0.99554
57514	ARHGAP31	-1.65402	-1.28218	3.75536	0.0978283	0.99554
83442	SH3BGRL3	0.159173	6.22991	3.75057	0.0980002	0.99554
410	ARSA	0.31301	3.37361	3.74696	0.0981304	0.99554
192286	HIGD2A	0.17532	6.07855	3.74519	0.0981941	0.99554
222584	FAM83B	-0.180921	7.64482	3.74348	0.0982556	0.99554
50619	DEF6	-0.506061	1.84743	3.74087	0.09835	0.99554
55711	FAR2	-0.358917	3.31482	3.73931	0.0984062	0.99554
27113	BBC3	0.359822	2.96114	3.73659	0.0985047	0.99554
64423	INF2	0.15532	6.95996	3.73552	0.0985437	0.99554
196383	RILPL2	0.270598	3.84956	3.73541	0.0985476	0.99554
9466	IL27RA	-0.352218	3.04985	3.73533	0.0985506	0.99554
427	ASAH1	0.26123	7.27378	3.73396	0.0986001	0.99554
199953	TMEM201	0.263128	4.29812	3.72967	0.0987558	0.99554
101926959	NA	1.7699	-0.691537	3.72384	0.0989681	0.99554
29967	LRP12	-0.247792	4.42367	3.72321	0.0989909	0.99554
80757	TMEM121	-0.584712	1.44539	3.72201	0.0990347	0.99554
9978	RBX1	-0.189909	5.17957	3.71399	0.0993281	0.99554
9308	CD83	-0.822139	0.445875	3.71192	0.0994039	0.99554
5126	PCSK2	-0.398687	5.55214	3.70929	0.0995005	0.99554
1362	CPD	0.225383	5.80752	3.70666	0.099597	0.99554
147923	ZNF420	-0.538143	2.72707	3.70653	0.0996018	0.99554
26576	SRPK3	-1.90829	-1.49325	3.70422	0.0996866	0.99554
7430	EZR	0.183662	7.98016	3.70419	0.0996878	0.99554
93323	HAUS8	-0.256238	4.15889	3.70333	0.0997194	0.99554
51363	CHST15	0.213483	6.38383	3.70248	0.0997509	0.99554
2631	NIPSNAP2	-0.172288	5.63717	3.70085	0.099811	0.99554
55062	WIPI1	0.271851	4.89646	3.70079	0.0998132	0.99554
10762	NUP50	-0.186676	6.32854	3.69837	0.0999022	0.99554
157378	TMEM65	0.170538	5.9946	3.69832	0.0999041	0.99554
25911	DPCD	0.31822	3.40927	3.69686	0.0999581	0.99554
284612	SYPL2	0.90683	-0.213819	3.69537	0.100013	0.99554
474343	SPIN2B	-0.360644	2.7028	3.69133	0.100163	0.99554
162514	TRPV3	-0.549035	1.37571	3.69112	0.100171	0.99554
101928706	NA	-0.746711	0.344202	3.68936	0.100236	0.99554
684959	SNORA25	-1.6564	-1.28181	3.68869	0.100261	0.99554
90381	TICRR	-0.313099	5.67097	3.67924	0.100612	0.99554
254559	MIR9-3HG	-0.70443	2.00962	3.67864	0.100634	0.99554
23649	POLA2	-0.180264	6.10927	3.67824	0.100649	0.99554
101929243	ILRUN-AS1	0.672143	0.566607	3.67752	0.100676	0.99554
3303	HSPA1A	0.159679	7.07085	3.67711	0.100692	0.99554
100507062	PSMD6-AS2	-0.521859	1.38604	3.67467	0.100782	0.99554
9804	TOMM20	-0.153283	7.56439	3.66892	0.100998	0.99554
4091	SMAD6	-0.361597	3.45791	3.66703	0.101068	0.99554
3795	KHK	-0.355301	3.7476	3.66427	0.101172	0.99554
55835	CENPJ	-0.257317	5.52006	3.66167	0.10127	0.99554
990	CDC6	-0.230973	5.97691	3.6609	0.101299	0.99554
55937	APOM	-0.691488	0.682366	3.65816	0.101402	0.99554
8165	AKAP1	0.15662	7.47581	3.65519	0.101514	0.99554
642361	NA	0.905685	-0.214023	3.65291	0.1016	0.99554
101928635	NA	1.66916	-1.15252	3.65163	0.101648	0.99554
56975	FAM20C	0.217174	4.99697	3.65016	0.101704	0.99554
2887	GRB10	0.326397	4.07458	3.64901	0.101747	0.99554
51377	UCHL5	-0.167988	6.14158	3.64731	0.101812	0.99554
1003	CDH5	1.17038	-0.0655847	3.64666	0.101836	0.99554
55361	PI4K2A	0.236205	5.04995	3.6463	0.10185	0.99554
23288	IQCE	0.174887	6.92817	3.64568	0.101873	0.99554
283417	DPY19L2	-1.39867	-0.934072	3.64492	0.101902	0.99554
51692	CPSF3	-0.162934	6.57087	3.6445	0.101918	0.99554
388531	RGS9BP	-0.617616	0.732897	3.64421	0.101929	0.99554
51667	NUB1	0.190915	5.66355	3.63935	0.102114	0.99554
84937	ZNRF1	0.18188	6.71101	3.63707	0.102201	0.99554
9993	DGCR2	0.156101	6.73181	3.63645	0.102224	0.99554
10555	AGPAT2	0.182132	5.44354	3.63162	0.102408	0.99554
1193	CLIC2	0.665664	0.471981	3.63123	0.102423	0.99554
90850	ZNF598	0.184745	5.77483	3.629	0.102508	0.99554
388650	DIPK1A	0.329999	3.08779	3.62684	0.102591	0.99554
152100	CMC1	-0.284727	3.80025	3.62635	0.10261	0.99554
11337	GABARAP	0.1539	7.06576	3.6257	0.102635	0.99554
285958	SNHG15	-0.266017	4.20863	3.62302	0.102737	0.99554
8943	AP3D1	0.152574	7.43831	3.62301	0.102738	0.99554
145282	MIPOL1	-0.397828	2.77043	3.6177	0.102942	0.99554
387841	RPL13AP20	2.00914	-1.56846	3.61582	0.103014	0.99554
8739	HRK	2.00914	-1.56846	3.61582	0.103014	0.99554
26115	TANC2	0.282425	8.45493	3.61563	0.103021	0.99554
28974	C19orf53	0.171391	5.68594	3.61025	0.103228	0.99554
6533	SLC6A6	0.371039	7.162	3.61023	0.103229	0.99554
2957	GTF2A1	-0.18944	6.69227	3.60992	0.103241	0.99554
988	CDC5L	-0.164935	6.77777	3.60934	0.103264	0.99554
102724235	NA	-1.0247	-0.787291	3.60799	0.103316	0.99554
139818	DOCK11	0.305823	3.68406	3.60264	0.103523	0.99554
101928222	WDR35-DT	-0.755972	0.012733	3.59468	0.103832	0.99554
9631	NUP155	-0.203968	6.52663	3.59304	0.103896	0.99554
10000	AKT3	-1.38921	-1.15625	3.59219	0.103929	0.99554
5475	PPEF1	1.0235	-0.784343	3.58895	0.104055	0.99554
2787	GNG5	0.257027	5.77329	3.58497	0.104211	0.99554
25939	SAMHD1	-0.189355	5.51777	3.57961	0.10442	0.99554
8318	CDC45	-0.180339	5.63535	3.57951	0.104424	0.99554
80781	COL18A1	0.190442	7.29538	3.57938	0.104429	0.99554
5584	PRKCI	-0.149985	6.90944	3.57768	0.104496	0.99554
390940	PINLYP	1.0476	-0.528277	3.57392	0.104644	0.99554
6001	RGS10	0.252058	4.18134	3.56958	0.104815	0.99554
56890	MDM1	-0.261795	4.24568	3.56436	0.10502	0.99554
56893	UBQLN4	0.157694	6.91823	3.56201	0.105113	0.99554
440519	ZNF724	-0.824241	0.504199	3.56065	0.105167	0.99554
7247	TSN	-0.148877	7.35344	3.55981	0.1052	0.99554
2786	GNG4	-0.54101	2.08228	3.55846	0.105254	0.99554
57646	USP28	-0.235414	4.78229	3.55722	0.105303	0.99554
51585	PCF11	-0.151197	6.90535	3.55695	0.105314	0.99554
9639	ARHGEF10	0.198523	5.11726	3.55507	0.105389	0.99554
54660	PCDHB18P	1.47688	-1.491	3.54581	0.105757	0.99554
3623	INHA	0.426342	1.99234	3.5398	0.105997	0.99554
1111	CHEK1	-0.269143	5.25208	3.53888	0.106034	0.99554
10024	TROAP	-0.206697	6.11507	3.53745	0.106091	0.99554
9694	EMC2	-0.200812	5.59651	3.53351	0.106249	0.99554
146279	TEKT5	0.890133	-0.31137	3.53335	0.106256	0.99554
151246	SGO2	-0.172555	5.92253	3.5333	0.106258	0.99554
384	ARG2	-0.497209	1.84006	3.53242	0.106293	0.99554
3635	INPP5D	1.02539	-0.784203	3.53202	0.106309	0.99554
11020	IFT27	-0.352729	3.18577	3.53035	0.106376	0.99554
80185	TTI2	-0.32007	3.93943	3.52896	0.106432	0.99554
7349	UCN	1.40456	-1.27921	3.52838	0.106455	0.99554
8795	TNFRSF10B	0.286364	6.13864	3.52737	0.106496	0.99554
84919	PPP1R15B	0.158948	8.06901	3.52655	0.106529	0.99554
4094	MAF	0.719769	1.67472	3.52613	0.106546	0.99554
643596	RNF224	0.943321	1.69605	3.52266	0.106686	0.99554
4194	MDM4	-0.166883	6.17417	3.5192	0.106826	0.99554
6583	SLC22A4	0.511623	2.19569	3.51913	0.106829	0.99554
388182	NA	-0.845853	-0.187317	3.51766	0.106888	0.99554
25840	METTL7A	-0.832446	3.78955	3.51558	0.106972	0.99554
5585	PKN1	0.16999	6.81686	3.51111	0.107153	0.99554
51442	VGLL1	1.31456	-0.380787	3.50658	0.107337	0.99554
84547	PGBD1	-0.527312	2.34781	3.50647	0.107342	0.99554
201799	TMEM154	-0.365376	2.93504	3.50522	0.107393	0.99554
23212	RRS1	0.223909	5.23004	3.50405	0.107441	0.99554
112770	GLMP	0.254663	4.7868	3.50381	0.10745	0.99554
146909	KIF18B	-0.201032	5.1039	3.50298	0.107484	0.99554
11133	KPTN	0.319206	3.27307	3.50015	0.1076	0.99554
1613	DAPK3	0.203175	5.08916	3.49745	0.10771	0.99554
100289495	NA	-0.550844	1.45584	3.49302	0.107891	0.99554
55916	NXT2	-0.219224	4.77666	3.49127	0.107963	0.99554
2733	GLE1	-0.153302	6.94042	3.48627	0.108169	0.99554
55088	CCDC186	0.172844	5.8714	3.48592	0.108183	0.99554
101929691	NA	-1.1495	-0.883967	3.48128	0.108374	0.99554
10772	SRSF10	-0.148389	7.48525	3.47882	0.108475	0.99554
58485	TRAPPC1	0.199227	6.13769	3.47776	0.108519	0.99554
51193	ZNF639	-0.167985	5.53416	3.47621	0.108583	0.99554
8935	SKAP2	0.159451	6.21784	3.47613	0.108586	0.99554
5817	PVR	0.235965	5.6027	3.47609	0.108588	0.99554
58986	PGAP6	0.193325	6.49865	3.47551	0.108612	0.99554
101927621	ZNF567-DT	0.862504	0.531482	3.47414	0.108669	0.99554
5890	RAD51B	-0.286636	3.59076	3.47393	0.108677	0.99554
3212	HOXB2	0.884395	0.492001	3.47271	0.108728	0.99554
10325	RRAGB	-0.300299	3.81313	3.47256	0.108734	0.99554
29085	PHPT1	0.156698	6.18539	3.47131	0.108786	0.99554
79888	LPCAT1	0.214679	8.46818	3.47118	0.108792	0.99554
27095	TRAPPC3	0.170409	5.56199	3.47111	0.108794	0.99554
3159	HMGA1	0.169302	6.74061	3.46569	0.109019	0.99554
6531	SLC6A3	-1.02427	-0.787363	3.4651	0.109044	0.99554
8218	CLTCL1	-0.34412	3.20959	3.46462	0.109064	0.99554
10733	PLK4	-0.207134	5.83791	3.46338	0.109116	0.99554
114791	TUBGCP5	-0.191744	5.36513	3.46337	0.109116	0.99554
63027	SLC22A23	0.285009	4.95759	3.46164	0.109188	0.99554
3073	HEXA	0.168093	6.98345	3.45985	0.109263	0.99554
91608	RASL10B	0.642015	0.638187	3.45868	0.109311	0.99554
134359	POC5	-0.22991	4.62533	3.45857	0.109316	0.99554
51513	ETV7	1.48073	-1.49063	3.457	0.109381	0.99554
80381	CD276	0.154392	7.00038	3.45689	0.109386	0.99554
54681	P4HTM	0.1995	5.22618	3.45461	0.109481	0.99554
5724	PTAFR	0.991316	-0.452045	3.45277	0.109558	0.99554
54939	COMMD4	-0.171454	5.87922	3.45096	0.109634	0.99554
344657	LRRIQ4	1.11067	-0.880644	3.45094	0.109635	0.99554
22978	NT5C2	0.190983	7.44634	3.44698	0.109801	0.99554
59277	NTN4	0.710499	5.31618	3.4463	0.109829	0.99554
1104	RCC1	0.14982	7.2522	3.44583	0.109849	0.99554
54922	RASIP1	0.689087	0.705359	3.44524	0.109874	0.99554
25789	TMEM59L	0.888632	-0.0642336	3.44313	0.109963	0.99554
285033	NA	-0.417279	1.97726	3.44291	0.109972	0.99554
5991	RFX3	0.396793	3.44886	3.44278	0.109977	0.99554
171546	SPTSSA	-0.177349	6.9517	3.44267	0.109982	0.99554
645811	CCDC154	0.916698	-0.489694	3.44248	0.10999	0.99554
7161	TP73	-0.401847	3.5542	3.4423	0.109998	0.99554
387066	NA	0.17613	5.49166	3.44113	0.110047	0.99554
9699	RIMS2	-0.408247	3.2479	3.4407	0.110065	0.99554
102724537	NA	-1.05072	-0.934076	3.5187	0.110235	0.99554
6522	SLC4A2	0.161287	7.56971	3.43521	0.110297	0.99554
1789	DNMT3B	-0.205295	5.48132	3.43464	0.110321	0.99554
22808	MRAS	-0.474803	1.48515	3.43451	0.110326	0.99554
28981	IFT81	-0.318992	3.8699	3.43442	0.11033	0.99554
100505530	NA	1.48015	-1.49056	3.43233	0.110418	0.99554
91752	ZNF804A	-0.421928	2.55304	3.43178	0.110442	0.99554
4696	NDUFA3	0.191642	4.98239	3.43156	0.110451	0.99554
11019	LIAS	-0.307335	3.34025	3.43064	0.11049	0.99554
1854	DUT	-0.170355	5.77181	3.43046	0.110497	0.99554
355	FAS	0.590434	3.02926	3.42855	0.110578	0.99554
1470	CST2	2.1768	-1.4899	3.42738	0.110628	0.99554
145864	HAPLN3	-0.795518	-0.127703	3.42686	0.11065	0.99554
2779	GNAT1	0.810532	-0.18323	3.42551	0.110707	0.99554
4862	NPAS2	0.503448	3.30621	3.42528	0.110717	0.99554
8187	ZNF239	-0.256977	4.11298	3.42268	0.110827	0.99554
79944	L2HGDH	-0.199543	5.74708	3.41929	0.110972	0.99554
643072	NA	0.381063	2.69008	3.41895	0.110986	0.99554
146542	ZNF688	-0.304146	3.53596	3.41805	0.111024	0.99554
283106	CSNK2A3	1.11056	-1.03781	3.41775	0.111037	0.99554
8564	KMO	1.11056	-1.03781	3.41775	0.111037	0.99554
4329	ALDH6A1	-0.177326	6.15154	3.41694	0.111072	0.99554
145270	PRIMA1	-0.461925	2.07021	3.41691	0.111073	0.99554
100132731	NA	-1.00412	-0.654151	3.41407	0.111194	0.99554
23023	TMCC1	0.227294	6.22113	3.41271	0.111252	0.99554
8531	YBX3	0.172648	6.811	3.41257	0.111258	0.99554
3791	KDR	0.609796	0.620173	3.41091	0.111329	0.99554
79846	CFAP69	0.611987	0.620795	3.41086	0.111331	0.99554
219899	TBCEL	0.232778	4.45769	3.41012	0.111363	0.99554
3688	ITGB1	0.172604	8.47367	3.40881	0.111419	0.99554
339479	BRINP3	-0.734793	4.36333	3.40734	0.111482	0.99554
388591	RNF207	0.576227	3.82424	3.40649	0.111518	0.99554
54948	MRPL16	-0.218352	5.36948	3.40447	0.111605	0.99554
8624	PSMG1	-0.178346	5.93894	3.40375	0.111636	0.99554
22998	LIMCH1	0.678983	4.74621	3.40276	0.111679	0.99554
101928059	NA	-1.40126	-0.93414	3.4024	0.111694	0.99554
4061	LY6E	0.255204	7.28561	3.40226	0.1117	0.99554
494470	RNF165	-1.37522	-1.41927	3.40195	0.111713	0.99554
55198	APPL2	0.196204	5.99467	3.40155	0.11173	0.99554
72	ACTG2	0.824471	3.39184	3.39531	0.111999	0.99554
9819	TSC22D2	0.18103	5.90864	3.394	0.112056	0.99554
407014	MIR25	-0.796745	-0.0415496	3.39336	0.112083	0.99554
143458	LDLRAD3	0.34859	3.95752	3.38987	0.112234	0.99554
9487	PIGL	0.377797	2.70757	3.38985	0.112235	0.99554
6923	ELOB	0.171639	6.80486	3.3893	0.112259	0.99554
80270	HSD3B7	-0.252604	5.62693	3.38652	0.112379	0.99554
10049	DNAJB6	0.24669	7.1532	3.38555	0.112421	0.99554
1464	CSPG4	-1.00494	-0.654008	3.38457	0.112464	0.99554
389333	PROB1	0.950092	-0.278026	3.38401	0.112488	0.99554
9265	CYTH3	0.24367	4.33212	3.38397	0.11249	0.99554
26261	FBXO24	-0.893316	-0.0698142	3.38185	0.112582	0.99554
126231	ZNF573	-0.590026	0.716545	3.38176	0.112586	0.99554
85415	RHPN2	0.220025	5.98507	3.38037	0.112646	0.99554
60491	NIF3L1	-0.181379	5.60705	3.37932	0.112691	0.99554
340351	AGBL3	0.625419	0.585291	3.3792	0.112697	0.99554
5468	PPARG	0.677692	3.18336	3.3767	0.112806	0.99554
79695	GALNT12	-0.464899	3.13372	3.37529	0.112867	0.99554
81550	TDRD3	-0.362261	3.80188	3.37243	0.112992	0.99554
57544	TXNDC16	0.20608	5.14702	3.37219	0.113002	0.99554
7030	TFE3	0.157774	5.95439	3.36824	0.113175	0.99554
84260	TCHP	-0.200117	4.85695	3.36755	0.113205	0.99554
90592	ZNF700	-0.298531	3.77164	3.36693	0.113232	0.99554
80765	STARD5	-0.480905	2.11437	3.36585	0.11328	0.99554
23596	OPN3	0.384125	4.49933	3.36445	0.113341	0.99554
23596	CHML	0.384125	4.49933	3.36445	0.113341	0.99554
9528	TMEM59	0.178811	6.87441	3.36213	0.113443	0.99554
6093	ROCK1	0.157315	7.29431	3.36201	0.113448	0.99554
93185	IGSF8	-0.229416	4.35237	3.36006	0.113533	0.99554
101928433	NA	0.433876	3.32271	3.35998	0.113537	0.99554
389791	NA	-1.52386	-1.34897	3.35823	0.113614	0.99554
55192	DNAJC17	0.296677	3.52785	3.3578	0.113633	0.99554
6480	ST6GAL1	0.669301	0.472362	3.35653	0.113689	0.99554
22835	ZFP30	-0.348938	3.48878	3.35539	0.113739	0.99554
22870	PPP6R1	0.144022	7.10824	3.35527	0.113744	0.99554
90	ACVR1	0.201434	5.11934	3.35524	0.113746	0.99554
30844	EHD4	0.196514	5.58455	3.35517	0.113749	0.99554
8654	PDE5A	0.287742	4.56959	3.35477	0.113766	0.99554
55568	GALNT10	0.297459	6.19173	3.35135	0.113917	0.99554
102723647	NA	-1.74118	-1.57139	3.35135	0.113917	0.99554
84061	MAGT1	-0.167179	7.13523	3.35043	0.113957	0.99554
51517	NCKIPSD	-0.220328	4.42221	3.34605	0.114151	0.99554
54718	BTN2A3P	0.747961	-0.0651034	3.34438	0.114225	0.99554
3	A2MP1	1.05681	0.640828	3.34163	0.114347	0.99554
139081	MAGEC3	-1.10896	-0.741506	3.34155	0.114351	0.99554
493812	HCG11	-0.261398	4.18241	3.3407	0.114388	0.99554
7837	PXDN	0.163232	6.77861	3.34048	0.114398	0.99554
253512	SLC25A30	0.199376	6.58766	3.33924	0.114453	0.99554
100506119	LINC01503	0.42655	2.05168	3.33685	0.11456	0.99554
118487	CHCHD1	0.218166	5.04642	3.33482	0.11465	0.99554
154661	RUNDC3B	-0.455741	2.68609	3.33336	0.114715	0.99554
284119	CAVIN1	0.333409	3.22621	3.3332	0.114722	0.99554
283404	LINC00592	1.30488	0.171769	3.33233	0.114761	0.99554
219790	RTKN2	-0.245173	4.05372	3.33077	0.11483	0.99554
84529	CDIN1	-0.283469	3.55649	3.33076	0.114831	0.99554
10093	ARPC4	0.144114	7.00164	3.33012	0.114859	0.99554
51074	APIP	-0.245476	4.63073	3.32719	0.11499	0.99554
26091	HERC4	0.152354	6.21383	3.32402	0.115132	0.99554
2280	FKBP1A	0.192539	7.04506	3.3225	0.1152	0.99554
5017	OVOL1	0.243152	4.77711	3.32221	0.115213	0.99554
22883	CLSTN1	0.176607	7.54172	3.3214	0.11525	0.99554
84553	FAXC	-0.358086	2.86335	3.31948	0.115336	0.99554
5603	MAPK13	-0.227113	4.42341	3.31792	0.115406	0.99554
101928615	NA	-1.37339	-1.41905	3.31758	0.115421	0.99554
200420	ALMS1P1	-1.37339	-1.41905	3.31758	0.115421	0.99554
399474	TMEM200B	-1.37339	-1.41905	3.31758	0.115421	0.99554
55799	CACNA2D3	-1.37339	-1.41905	3.31758	0.115421	0.99554
7134	TNNC1	-1.37339	-1.41905	3.31758	0.115421	0.99554
80179	MYO19	-0.179435	6.12322	3.31628	0.115479	0.99554
9764	KIAA0513	0.538049	6.47057	3.31565	0.115508	0.99554
55145	THAP1	-0.26573	3.88766	3.31434	0.115566	0.99554
57140	RNPEPL1	0.161881	5.7453	3.31377	0.115592	0.99554
26524	LATS2	0.161661	5.83063	3.31352	0.115603	0.99554
167227	DCP2	-0.152477	6.27313	3.31279	0.115636	0.99554
100130370	NA	-1.05116	-0.934003	3.31238	0.115655	0.99554
114793	FMNL2	0.269311	4.71366	3.31224	0.115661	0.99554
84626	KRBA1	0.396404	2.45918	3.31125	0.115706	0.99554
6764	DENND2B	-0.555249	1.81835	3.3107	0.115731	0.99554
55142	HAUS2	-0.19491	4.81058	3.30568	0.115957	0.99554
83737	ITCH	0.149359	6.76638	3.30473	0.116	0.99554
55624	POMGNT1	0.236654	5.57773	3.30473	0.116	0.99554
138151	NACC2	0.209241	6.18186	3.30434	0.116018	0.99554
598	BCL2L1	0.234733	6.85408	3.30207	0.116121	0.99554
55084	SOBP	-0.471356	2.74117	3.30127	0.116157	0.99554
90321	ZNF766	-0.223592	4.5554	3.29997	0.116216	0.99554
284325	C19orf54	-0.306619	4.47368	3.29898	0.116261	0.99554
339500	ZNF678	-0.254164	4.30602	3.29712	0.116345	0.99554
51735	RAPGEF6	-0.230309	5.453	3.29657	0.11637	0.99554
26123	TCTN3	0.160643	5.69371	3.29267	0.116548	0.99554
102724006	NA	-1.52203	-1.34876	3.29233	0.116563	0.99554
8346	H2BC10	-2.1893	-1.34992	3.28946	0.116694	0.99554
63901	FAM111A	-0.173992	6.10744	3.28903	0.116714	0.99554
83592	AKR1E2	-0.275813	3.72926	3.28834	0.116745	0.99554
196	AHR	0.379729	6.18325	3.28666	0.116822	0.99554
143888	POGLUT3	-0.288153	4.60608	3.28653	0.116828	0.99554
100129716	ARRDC3-AS1	0.678761	0.738647	3.28517	0.116889	0.99554
9885	OSBPL2	0.197924	6.94306	3.28382	0.116952	0.99554
9590	AKAP12	-0.759855	1.52057	3.28352	0.116965	0.99554
10714	POLD3	-0.160857	5.61909	3.28315	0.116982	0.99554
2873	GPS1	0.175498	7.01086	3.28279	0.116998	0.99554
154091	SLC2A12	0.582688	2.50628	3.28265	0.117005	0.99554
119385	NA	-0.702741	0.597183	3.27973	0.117139	0.99554
55644	OSGEP	-0.233005	4.66881	3.27816	0.117211	0.99554
677847	SNORA81	-0.683256	1.18619	3.27694	0.117267	0.99554
92335	STRADA	-0.170226	5.81573	3.27442	0.117382	0.99554
5174	PDZK1	0.46159	2.69886	3.2741	0.117397	0.99554
23395	LARS2	-0.277923	4.72686	3.27322	0.117437	0.99554
80742	PRR3	-0.261052	4.31249	3.27268	0.117462	0.99554
7763	ZFAND5	0.162182	6.4	3.27222	0.117484	0.99554
1643	DDB2	0.203106	6.50343	3.27204	0.117492	0.99554
102723992	NA	0.723012	0.24058	3.27063	0.117557	0.99554
5829	PXN	0.15071	8.63006	3.26761	0.117696	0.99554
5983	RFC3	-0.171878	6.76836	3.2665	0.117747	0.99554
55527	FEM1A	0.225469	4.86746	3.26561	0.117788	0.99554
1763	DNA2	-0.205949	5.23672	3.26479	0.117826	0.99554
11069	RAPGEF4	-0.704879	1.55068	3.26413	0.117857	0.99554
682	BSG	0.150864	9.19303	3.26398	0.117864	0.99554
23171	GPD1L	0.208293	7.20367	3.26214	0.117949	0.99554
23192	ATG4B	0.167592	6.49108	3.25914	0.118088	0.99554
3916	LAMP1	0.188615	7.58807	3.25786	0.118147	0.99554
642	BLMH	-0.289515	4.52628	3.25686	0.118194	0.99554
83857	TMTC1	-0.286126	3.72488	3.25627	0.118221	0.99554
9994	CASP8AP2	-0.192335	6.23629	3.25619	0.118224	0.99554
64746	ACBD3	0.152544	6.59028	3.25543	0.11826	0.99554
127544	RNF19B	0.23767	4.17378	3.25349	0.11835	0.99554
101735302	STAG3L5P	0.847149	-0.246113	3.24772	0.118619	0.99554
4131	MAP1B	0.478014	3.69866	3.24756	0.118626	0.99554
3149	HMGB3	-0.140878	8.30953	3.24305	0.118837	0.99554
84539	MCHR2	-0.464921	1.50451	3.24262	0.118857	0.99554
831	CAST	0.25719	7.46069	3.24051	0.118956	0.99554
79892	MCMBP	-0.154915	7.03113	3.23968	0.118995	0.99554
159963	SLC5A12	-0.522063	1.71548	3.23857	0.119047	0.99554
54621	VSIG10	0.213094	6.06854	3.237	0.11912	0.99554
23294	ANKS1A	0.176741	5.79941	3.23656	0.119141	0.99554
63925	ZNF335	0.191154	5.71798	3.23566	0.119183	0.99554
692203	NA	-0.900177	-0.249952	3.22899	0.119497	0.99554
374659	HDDC3	-0.247323	4.58048	3.22862	0.119514	0.99554
93663	ARHGAP18	0.243999	4.63537	3.22633	0.119622	0.99554
80012	PHC3	-0.174453	6.71586	3.2221	0.119822	0.99554
55666	NPLOC4	0.159073	7.59256	3.22099	0.119875	0.99554
6251	RSU1	0.153182	6.85413	3.21884	0.119976	0.99554
4176	MCM7	-0.167135	8.81952	3.21673	0.120077	0.99554
64852	TUT1	-0.33052	4.60721	3.21403	0.120204	0.99554
10975	UQCR11	0.173883	5.26385	3.21242	0.120281	0.99554
80143	SIKE1	-0.148691	7.87262	3.21161	0.120319	0.99554
285464	NA	-0.331344	2.79089	3.21	0.120396	0.99554
9948	WDR1	0.143113	8.51758	3.20964	0.120413	0.99554
25844	YIPF3	0.148534	6.49453	3.20723	0.120528	0.99554
256471	MFSD8	-0.195287	4.75981	3.20675	0.120551	0.99554
158046	NXNL2	0.460278	2.01144	3.20607	0.120583	0.99554
23475	QPRT	0.252959	6.88145	3.20593	0.12059	0.99554
64710	NUCKS1	-0.143617	10.649	3.20527	0.120621	0.99554
23673	STX12	0.217576	5.72757	3.20368	0.120697	0.99554
100129726	LINC01126	0.899881	0.939115	3.20246	0.120756	0.99554
22974	TPX2	-0.156764	8.27591	3.20172	0.120791	0.99554
219771	CCNY	0.148005	6.78874	3.20026	0.120861	0.99554
402682	UFSP1	0.529507	1.41292	3.19938	0.120903	0.99554
4698	NDUFA5	-0.143417	6.5707	3.19785	0.120976	0.99554
56103	PCDHGB2	-0.6671	0.524482	3.19776	0.120981	0.99554
51776	MAP3K20	-0.160268	6.2096	3.19756	0.12099	0.99554
80329	ULBP1	-0.359421	3.00098	3.1973	0.121002	0.99554
101928527	PIGBOS1	-0.413803	2.41001	3.19698	0.121018	0.99554
63976	PRDM16	-0.359012	2.69007	3.19565	0.121082	0.99554
27018	BEX3	-0.171646	7.41034	3.1936	0.12118	0.99554
57526	PCDH19	-0.444925	2.9319	3.19237	0.121239	0.99554
57122	NUP107	-0.147457	6.9871	3.19229	0.121243	0.99554
157247	NA	-0.302604	3.32471	3.19228	0.121244	0.99554
131118	DNAJC19	-0.249154	4.03464	3.19027	0.12134	0.99554
102723554	NA	1.00915	-0.930956	3.18948	0.121378	0.99554
196385	DNAH10	0.771699	0.0177373	3.18607	0.121543	0.99554
284739	C20orf204	-0.479274	1.33356	3.18473	0.121607	0.99554
4043	LRPAP1	0.171781	6.6952	3.18416	0.121635	0.99554
115111	SLC26A7	0.95372	1.14974	3.1836	0.121662	0.99554
102724873	NA	-0.389448	2.63447	3.17878	0.121895	0.99554
54328	GPR173	-0.531636	1.76415	3.17816	0.121924	0.99554
79966	SCD5	0.2758	3.68037	3.17718	0.121972	0.99554
351	APP	0.169017	8.91908	3.17629	0.122015	0.99554
2561	GABRB2	-0.741266	1.31008	3.1759	0.122034	0.99554
7184	HSP90B1	-0.134523	9.48039	3.17584	0.122037	0.99554
51715	RAB23	-0.196118	4.78031	3.17385	0.122134	0.99554
221322	TBC1D32	-0.35834	2.47523	3.1716	0.122243	0.99554
1543	CYP1A1	1.38703	4.18681	3.1699	0.122325	0.99554
1070	CETN3	-0.194212	4.82464	3.16892	0.122373	0.99554
10207	PATJ	0.233847	6.60028	3.16647	0.122493	0.99554
11098	PRSS23	0.582592	7.34816	3.16634	0.122499	0.99554
332	BIRC5	-0.151171	6.66484	3.16538	0.122546	0.99554
388403	YPEL2	0.274346	5.3844	3.16078	0.12277	0.99554
8520	HAT1	-0.145254	6.91598	3.16046	0.122786	0.99554
63891	RNF123	0.239599	4.84845	3.16039	0.12279	0.99554
440590	ZYG11A	-0.311028	3.64394	3.15554	0.123027	0.99554
4792	NFKBIA	0.140191	7.47006	3.15262	0.12317	0.99554
729218	NA	-0.401651	2.21636	3.15255	0.123173	0.99554
440093	H3-5	-1.08444	-0.612412	3.15246	0.123178	0.99554
6158	RPL28	0.175495	8.25714	3.15109	0.123245	0.99554
100302185	MIR1204	0.575836	0.602501	3.14895	0.123351	0.99554
23658	LSM5	-0.145647	6.53934	3.14645	0.123473	0.99554
88455	ANKRD13A	0.205088	5.34456	3.14546	0.123522	0.99554
401898	NA	-0.623755	0.447512	3.14528	0.123531	0.99554
346157	ZNF391	-0.3873	2.28895	3.1439	0.123599	0.99554
55856	ACOT13	-0.189687	4.86378	3.14249	0.123669	0.99554
7702	ZNF143	0.274361	4.38272	3.14185	0.123701	0.99554
79973	ZNF442	-0.785122	0.365126	3.14067	0.123759	0.99554
401397	SMIM30	-0.239781	4.59738	3.14049	0.123767	0.99554
441027	TMEM150C	0.185096	6.03313	3.13977	0.123803	0.99554
64319	FBRS	0.171381	6.73611	3.13877	0.123853	0.99554
2590	GALNT2	0.171592	6.15831	3.13869	0.123857	0.99554
79671	NLRX1	-0.516882	2.19839	3.13594	0.123993	0.99554
100507599	TFIP11-DT	-0.385027	2.19304	3.13563	0.124008	0.99554
9988	DMTF1	-0.166081	6.34877	3.13452	0.124063	0.99554
5358	PLS3	0.560722	1.81866	3.13378	0.1241	0.99554
55362	TMEM63B	0.158548	6.38375	3.13353	0.124112	0.99554
9126	SMC3	-0.173577	6.99732	3.13179	0.124199	0.99554
255403	ZNF718	-0.228876	4.27054	3.12987	0.124294	0.99554
9747	TCAF1	-0.207782	5.89217	3.12835	0.12437	0.99554
84895	MIGA2	0.160082	5.52281	3.12762	0.124406	0.99554
3352	HTR1D	0.639382	1.15843	3.12741	0.124416	0.99554
81532	MOB2	0.302989	3.29506	3.12617	0.124478	0.99554
221491	SMIM29	0.296737	3.38685	3.12463	0.124555	0.99554
201501	ZBTB7C	2.00422	-1.56912	3.12386	0.124593	0.99554
3398	ID2	-0.220993	6.83717	3.12345	0.124614	0.99554
662	BNIP1	-0.315827	3.72645	3.12324	0.124624	0.99554
10184	LHFPL2	0.312112	5.19269	3.12294	0.124639	0.99554
116832	RPL39L	-0.274684	3.49874	3.1176	0.124906	0.99554
3978	LIG1	-0.21619	6.42526	3.11676	0.124949	0.99554
2323	FLT3LG	1.20587	-0.692724	3.11583	0.124995	0.99554
2334	AFF2	-0.544782	1.10182	3.1135	0.125111	0.99554
7764	ZNF217	0.180286	9.49792	3.11344	0.125115	0.99554
57169	ZNFX1	0.2206	6.80061	3.1112	0.125227	0.99554
27079	RPUSD2	0.409103	3.12472	3.11036	0.12527	0.99554
400945	LINC01376	0.672219	0.0953218	3.10885	0.125345	0.99554
84705	GTPBP3	-0.252499	4.51983	3.10756	0.12541	0.99554
2030	SLC29A1	-0.192434	5.7688	3.10575	0.125501	0.99554
130340	AP1S3	0.465081	4.47732	3.10483	0.125548	0.99554
56124	PCDHB12	-0.815568	0.256986	3.10276	0.125652	0.99554
79621	RNASEH2B	-0.266568	4.68524	3.10267	0.125657	0.99554
538	ATP7A	0.196686	4.65317	3.10235	0.125673	0.99554
4998	ORC1	-0.239338	4.45618	3.10146	0.125718	0.99554
51573	GDE1	0.150069	7.68682	3.10042	0.12577	0.99554
9725	TMEM63A	0.310332	5.5754	3.10039	0.125772	0.99554
257000	TINCR	0.384566	6.12616	3.09961	0.125811	0.99554
102724757	NA	-0.589203	0.579391	3.09947	0.125818	0.99554
10893	MMP24	0.889645	-0.608946	3.09847	0.125869	0.99554
9618	TRAF4	0.207721	6.84849	3.09804	0.125891	0.99554
399687	MYO18A	0.300872	5.339	3.09527	0.126031	0.99554
10198	MPHOSPH9	-0.20384	6.17315	3.09445	0.126072	0.99554
715	C1R	0.799998	-0.0375225	3.09384	0.126103	0.99554
3133	HLA-E	0.172795	6.92664	3.09204	0.126195	0.99554
400451	FAM174B	0.537715	5.62357	3.09146	0.126224	0.99554
23225	NUP210	-0.151258	7.93924	3.09138	0.126228	0.99554
85439	STON2	-0.255682	5.32368	3.0874	0.126431	0.99554
8341	H2BC15	-0.778457	0.366341	3.08653	0.126475	0.99554
389538	NA	0.350929	2.73599	3.08487	0.126559	0.99554
23636	NUP62	-0.154636	6.67984	3.08372	0.126618	0.99554
3184	HNRNPD	-0.180751	7.962	3.08326	0.126642	0.99554
57532	NUFIP2	0.146202	7.59034	3.08108	0.126753	0.99554
79672	FN3KRP	-0.216168	5.62089	3.07945	0.126836	0.99554
286256	LCN12	-0.896158	-0.156892	3.07917	0.12685	0.99554
3163	HMOX2	0.15569	5.82188	3.07876	0.126871	0.99554
126382	NR2C2AP	-0.173731	5.2432	3.07621	0.127002	0.99554
25936	NSL1	-0.218178	4.37136	3.07601	0.127012	0.99554
138199	CARNMT1	-0.24153	4.12215	3.07493	0.127067	0.99554
9516	LITAF	0.180284	7.64746	3.0747	0.127079	0.99554
101927850	NA	-1.16163	-0.317146	3.07444	0.127092	0.99554
152926	PPM1K	-0.294882	4.58216	3.07415	0.127107	0.99554
54704	PDP1	-0.190599	5.20915	3.07236	0.127199	0.99554
102724814	AP1G2-AS1	0.389228	2.45518	3.07185	0.127225	0.99554
11187	PKP3	0.146768	6.33712	3.06824	0.127411	0.99554
144245	ALG10B	-0.290973	3.71408	3.06543	0.127555	0.99554
7398	USP1	-0.22024	6.97194	3.06469	0.127593	0.99554
80824	DUSP16	0.198455	6.41405	3.06303	0.127679	0.99554
57480	PLEKHG1	0.739821	0.992366	3.06273	0.127695	0.99554
652995	NA	0.725788	2.61874	3.06222	0.127721	0.99554
220	ALDH1A3	0.99657	4.95808	3.05968	0.127852	0.99554
7852	CXCR4	0.356941	4.27682	3.05933	0.12787	0.99554
55041	PLEKHB2	0.262717	8.01432	3.05917	0.127879	0.99554
5590	PRKCZ	0.213283	4.90129	3.05796	0.127941	0.99554
8933	RTL8C	0.160004	6.23852	3.05755	0.127962	0.99554
11329	STK38	0.213718	7.24155	3.057	0.127991	0.99554
400604	TOB1-AS1	0.48672	1.41379	3.05685	0.127999	0.99554
10682	EBP	0.188311	6.16735	3.05667	0.128008	0.99554
653390	NA	1.11441	-0.879932	3.05551	0.128068	0.99554
102724081	NA	0.890974	-0.608736	3.0524	0.128229	0.99554
25946	ZNF385A	0.165474	5.45495	3.05216	0.128242	0.99554
10561	IFI44	1.10708	-1.03817	3.05155	0.128273	0.99554
128817	CSTL1	-0.843943	-0.493966	3.04715	0.128502	0.99554
90333	ZNF468	-0.193292	4.91765	3.04651	0.128535	0.99554
5820	NA	0.191982	5.19534	3.04585	0.128569	0.99554
6237	RRAS	0.336722	3.88755	3.04421	0.128655	0.99554
7157	TP53	-0.181927	7.54987	3.04334	0.1287	0.99554
84952	CGNL1	-0.432984	2.30588	3.04146	0.128798	0.99554
51426	POLK	-0.261502	4.45865	3.04088	0.128829	0.99554
25799	ZNF324	0.297343	3.34855	3.03851	0.128953	0.99554
2177	FANCD2	-0.147055	6.56315	3.0375	0.129006	0.99554
728229	TMEM191B	-0.842309	-0.384325	3.03667	0.129049	0.99554
23564	DDAH2	-0.15033	6.3833	3.0355	0.12911	0.99554
837	CASP4	0.927638	-0.831549	3.11907	0.129158	0.99554
2050	EPHB4	0.194443	7.68352	3.03308	0.129237	0.99554
53358	SHC3	-0.755961	0.0122663	3.0302	0.129388	0.99554
55286	C4orf19	0.299904	4.5372	3.02557	0.129632	0.99554
23007	PLCH1	-0.336456	4.62886	3.02353	0.129739	0.99554
84293	PRXL2A	0.19612	7.51142	3.02289	0.129773	0.99554
51599	LSR	0.162011	7.03145	3.02126	0.129859	0.99554
91748	MIDEAS	0.170243	7.6439	3.01811	0.130025	0.99554
92558	BICDL1	0.17253	5.61269	3.01664	0.130103	0.99554
283927	NUDT7	0.23745	3.90449	3.01568	0.130154	0.99554
57191	VN1R1	1.40412	-1.27958	3.015	0.13019	0.99554
25778	DSTYK	-0.147796	6.10728	3.01111	0.130397	0.99554
60676	PAPPA2	1.25599	-1.34673	3.00663	0.130634	0.99554
18	ABAT	0.197124	6.83325	3.00631	0.130651	0.99554
5899	RALB	0.188486	7.154	3.00487	0.130728	0.99554
27020	NPTN	0.143282	7.19239	3.00241	0.13086	0.99554
93	ACVR2B	-0.326512	4.04355	3.00099	0.130935	0.99554
113675	SDSL	-0.300673	3.60675	3.00094	0.130938	0.99554
5970	RELA	0.139673	6.67716	2.99983	0.130997	0.99554
9367	RAB9A	0.21212	5.45746	2.9994	0.13102	0.99554
114780	PKD1L2	0.50887	1.71583	2.99863	0.131062	0.99554
1030	CDKN2B	0.445523	5.99248	2.99845	0.131071	0.99554
6591	SNAI2	1.08407	2.48318	2.99835	0.131076	0.99554
817	CAMK2D	0.183403	5.14053	2.99778	0.131107	0.99554
8817	FGF18	0.553155	0.891886	2.99435	0.131291	0.99554
23165	NUP205	-0.1687	7.82278	2.99416	0.131301	0.99554
226	ALDOA	0.12975	11.2351	2.99344	0.131339	0.99554
7552	ZNF711	-0.516909	2.79456	2.9901	0.131519	0.99554
55128	TRIM68	-0.666321	0.302185	2.98963	0.131544	0.99554
2872	MKNK2	0.197786	5.93349	2.98665	0.131704	0.99554
4358	MPV17	0.177616	5.66819	2.9865	0.131712	0.99554
102723342	NA	0.985757	-0.452387	2.98171	0.13197	0.99554
9693	RAPGEF2	0.164866	5.50872	2.98081	0.132019	0.99554
6175	RPLP0	0.145767	10.5814	2.98063	0.132029	0.99554
51166	AADAT	-0.284472	3.77783	2.98007	0.132059	0.99554
5195	PEX14	0.263681	3.50533	2.97936	0.132097	0.99554
100507458	NA	-0.366514	2.72754	2.97867	0.132135	0.99554
101929333	NA	1.3648	-1.0938	2.97762	0.132191	0.99554
27242	TNFRSF21	0.362125	5.58521	2.97642	0.132256	0.99554
64770	CCDC14	-0.229297	6.23191	2.97598	0.13228	0.99554
149175	MANEAL	-0.165149	5.32956	2.97384	0.132396	0.99554
10134	BCAP31	0.142698	8.25353	2.97326	0.132427	0.99554
100505585	NA	-1.08524	-1.09759	2.9714	0.132529	0.99554
5138	PDE2A	-1.08524	-1.09759	2.9714	0.132529	0.99554
4515	MTCP1	-0.539192	1.47585	2.97115	0.132542	0.99554
9108	MTMR7	-0.315072	3.4824	2.97055	0.132575	0.99554
55646	LYAR	-0.323193	4.83426	2.97025	0.132591	0.99554
83548	COG3	0.141371	6.43636	2.97013	0.132597	0.99554
2967	GTF2H3	-0.179268	6.05728	2.96994	0.132608	0.99554
50488	MINK1	0.141956	7.14666	2.96941	0.132637	0.99554
6497	SKI	0.164744	5.52548	2.96835	0.132694	0.99554
27349	MCAT	0.300271	3.58747	2.96608	0.132818	0.99554
89796	NAV1	0.493739	1.48367	2.96489	0.132882	0.99554
83886	PRSS27	-0.518719	1.43576	2.96485	0.132885	0.99554
2049	EPHB3	0.271259	3.77748	2.96345	0.132961	0.99554
158584	FAAH2	-0.445659	1.75632	2.96329	0.13297	0.99554
114876	OSBPL1A	0.184758	4.83582	2.96197	0.133041	0.99554
57228	SMAGP	0.198988	4.6166	2.96181	0.13305	0.99554
11182	SLC2A6	0.34114	4.0354	2.95974	0.133164	0.99554
89876	CFAP91	-0.896841	-0.156756	2.95973	0.133164	0.99554
338651	KRTAP5-AS1	0.326565	4.46775	2.95561	0.133389	0.99554
83439	TCF7L1	0.311517	3.99477	2.954	0.133477	0.99554
101926895	CRTC3-AS1	0.991187	-0.451626	2.9474	0.13384	0.99554
7328	UBE2H	0.139753	7.08675	2.94667	0.13388	0.99554
285966	TCAF2	-0.460769	2.52287	2.9437	0.134044	0.99554
4528	MTIF2	-0.150055	6.03508	2.94216	0.134129	0.99554
50801	KCNK4	-1.08617	-1.09744	2.94129	0.134177	0.99554
128218	TMEM125	0.260831	3.68155	2.93803	0.134357	0.99554
124975	GGT6	-1.39191	-1.15631	2.93358	0.134604	0.99554
63982	ANO3	-1.39191	-1.15631	2.93358	0.134604	0.99554
23191	CYFIP1	0.153665	7.41285	2.93076	0.13476	0.99554
4947	OAZ2	-0.15192	5.63506	2.92782	0.134924	0.99554
637	BID	0.16677	5.64728	2.92665	0.134989	0.99554
10103	TSPAN1	0.48962	3.23404	2.92571	0.135041	0.99554
762	CA4	0.280583	3.43184	2.92557	0.135049	0.99554
126374	WTIP	0.479818	1.43273	2.92505	0.135078	0.99554
23177	CEP68	-0.232243	4.57391	2.92345	0.135167	0.99554
29887	SNX10	-0.234143	4.24899	2.92318	0.135182	0.99554
114599	SNORD15B	-1.37422	-1.41942	2.92249	0.135221	0.99554
647859	NA	-1.37422	-1.41942	2.92249	0.135221	0.99554
9187	SLC24A1	-0.203235	4.77245	2.92127	0.135289	0.99554
6314	ATXN7	-0.149586	6.74572	2.9201	0.135354	0.99554
57695	USP37	-0.194225	6.11025	2.91968	0.135378	0.99554
9496	TBX4	0.542094	1.443	2.91909	0.135411	0.99554
140469	MYO3B	1.10288	-1.21518	3.01887	0.135473	0.99554
149095	DCST1	1.10288	-1.21518	3.01887	0.135473	0.99554
2633	GBP1	1.10288	-1.21518	3.01887	0.135473	0.99554
3659	IRF1	0.373929	4.08141	2.91738	0.135507	0.99554
57325	KAT14	-0.178342	4.91464	2.91675	0.135542	0.99554
5627	PROS1	-0.439599	1.56051	2.91423	0.135683	0.99554
55515	ASIC4	-1.08047	-0.612135	2.91274	0.135766	0.99554
5031	P2RY6	0.255896	3.92255	2.90948	0.13595	0.99554
3927	LASP1	0.264069	8.03772	2.90727	0.136074	0.99554
8408	ULK1	0.413427	7.54329	2.90572	0.136161	0.99554
284047	CCDC144B	-0.562113	0.700493	2.90324	0.136301	0.99554
1017	CDK2	-0.14254	6.76893	2.90292	0.136319	0.99554
3875	KRT18	0.134166	12.9697	2.901	0.136428	0.99554
2498	NA	-1.7441	-1.57146	2.90068	0.136446	0.99554
400221	NA	-1.7441	-1.57146	2.90068	0.136446	0.99554
84698	CAPS2	-0.598835	0.632833	2.90051	0.136455	0.99554
23359	FAM189A1	1.07056	-0.12263	2.89679	0.136666	0.99554
101928402	STAG2-AS1	-1.19767	-1.04131	2.89577	0.136724	0.99554
391	RHOG	0.216685	4.24382	2.8946	0.13679	0.99554
10169	SERF2	0.138953	7.44542	2.8943	0.136807	0.99554
2669	GEM	0.770992	1.17177	2.89393	0.136828	0.99554
9768	PCLAF	-0.147588	6.63803	2.89362	0.136846	0.99554
55275	VPS53	0.170813	5.69639	2.89338	0.136859	0.99554
29881	NPC1L1	0.976054	-0.567428	2.89232	0.136919	0.99554
58490	RPRD1B	-0.147765	5.99268	2.89168	0.136956	0.99554
677805	SNORA18	0.918171	-0.123505	2.89098	0.136996	0.99554
64641	EBF2	-2.05454	-1.41919	2.89023	0.137038	0.99554
55219	MACO1	0.175085	5.08259	2.89014	0.137043	0.99554
1468	SLC25A10	0.144786	6.27398	2.88973	0.137067	0.99554
4810	NHS	0.308898	3.81797	2.88931	0.13709	0.99554
92105	INTS4	-0.191162	4.72898	2.88901	0.137107	0.99554
9340	GLP2R	1.27314	-0.527938	2.88759	0.137188	0.99554
93627	TBCK	0.195316	5.17426	2.88572	0.137295	0.99554
4047	LSS	0.139822	8.43017	2.88283	0.137459	0.99554
56109	PCDHGA6	-0.682244	0.115763	2.88268	0.137468	0.99554
84844	PHF5A	-0.202704	5.33662	2.88259	0.137473	0.99554
23464	GCAT	-0.351296	2.72817	2.88094	0.137568	0.99554
619567	NA	-0.558372	0.561317	2.87767	0.137754	0.99554
[truncated: 13,609 more rows]

## Sheet: GTC365
GeneID	hgnc_symbol	logFC	logCPM	F	PValue	FDR
3148	HMGB2	-2.20114	7.84675	563.189	1.19394e-07	0.000582462
7083	TK1	-2.05719	6.65045	471.882	2.12912e-07	0.000582462
7153	TOP2A	-2.0214	8.32965	451.953	2.45135e-07	0.000582462
51659	GINS2	-2.13361	5.98663	434.894	2.77939e-07	0.000582462
10024	TROAP	-2.18899	5.51404	414.987	3.23844e-07	0.000582462
55771	PRR11	-2.03246	7.48783	394.91	3.80672e-07	0.000582462
983	CDK1	-1.99541	6.33408	386.457	4.08479e-07	0.000582462
9493	KIF23	-1.92945	6.64229	356.181	5.32763e-07	0.000582462
64393	ZMAT3	1.76446	6.34679	352.643	5.50352e-07	0.000582462
26147	PHF19	-1.83142	5.61186	345.344	5.89095e-07	0.000582462
7272	TTK	-2.39433	5.44152	345.226	5.89752e-07	0.000582462
10112	KIF20A	-3.00876	6.20774	335.472	6.47355e-07	0.000582462
60401	EDA2R	2.1825	4.90919	326.886	7.0426e-07	0.000582462
9768	PCLAF	-2.01763	6.04077	324.688	7.19875e-07	0.000582462
374393	FAM111B	-2.40123	5.40002	320.724	7.49182e-07	0.000582462
2305	FOXM1	-1.87099	7.29245	307.128	8.62312e-07	0.000582462
132671	SPATA18	2.18619	5.26186	304.801	8.83865e-07	0.000582462
1062	CENPE	-2.50107	5.70993	304.145	8.90064e-07	0.000582462
8318	CDC45	-2.0867	5.04199	303.929	8.92125e-07	0.000582462
3833	KIFC1	-2.40703	5.89602	296.515	9.66534e-07	0.000582462
23397	NCAPH	-2.16088	5.56751	293.36	1.00066e-06	0.000582462
55215	FANCI	-1.94254	7.24164	290.445	1.03359e-06	0.000582462
54443	ANLN	-2.10873	7.41317	290.221	1.03618e-06	0.000582462
55055	ZWILCH	-1.65862	5.8723	288.639	1.0547e-06	0.000582462
3925	STMN1	-1.54966	7.40857	287.761	1.06517e-06	0.000582462
4001	LMNB1	-2.01285	7.40718	285.386	1.09417e-06	0.000582462
24137	KIF4A	-2.42877	5.76098	284.138	1.10983e-06	0.000582462
2177	FANCD2	-1.61884	6.05351	276.895	1.20667e-06	0.000582462
9212	AURKB	-2.26129	4.88466	274.773	1.23711e-06	0.000582462
672	BRCA1	-1.86884	5.85962	273.104	1.26176e-06	0.000582462
10403	NDC80	-2.64977	4.79048	270.89	1.29546e-06	0.000582462
6941	TCF19	-2.06421	5.37622	265.748	1.37837e-06	0.000582462
4171	MCM2	-1.83883	7.00076	262.824	1.4286e-06	0.000582462
5557	PRIM1	-1.87815	5.05374	258.614	1.50521e-06	0.000582462
29028	ATAD2	-1.96588	8.27672	258.462	1.50807e-06	0.000582462
9928	KIF14	-2.56716	5.72432	258.095	1.51502e-06	0.000582462
7112	TMPO	-1.5393	8.13867	253.458	1.6065e-06	0.000582462
8914	TIMELESS	-1.37825	7.40749	253.364	1.60841e-06	0.000582462
113130	CDCA5	-2.10167	6.09386	252.227	1.63198e-06	0.000582462
10926	DBF4	-1.52004	5.66358	251.679	1.6435e-06	0.000582462
4605	MYBL2	-1.86248	7.58655	249.569	1.68882e-06	0.000582462
332	BIRC5	-2.54949	5.97885	247.297	1.73948e-06	0.000582462
4085	MAD2L1	-2.11619	5.56799	246.912	1.74826e-06	0.000582462
3161	HMMR	-2.33666	5.65511	245.198	1.78805e-06	0.000582462
146909	KIF18B	-2.30185	4.48357	244.134	1.81335e-06	0.000582462
151648	SGO1	-2.12389	4.58673	243.826	1.82075e-06	0.000582462
220042	DDIAS	-2.03125	4.74994	241.88	1.86848e-06	0.000582462
10615	SPAG5	-2.13483	6.12065	241.504	1.87789e-06	0.000582462
10733	PLK4	-1.78846	5.31775	240.409	1.90565e-06	0.000582462
195828	ZNF367	-1.993	4.84167	238.673	1.95078e-06	0.000582462
9134	CCNE2	-1.64578	5.75355	237.961	1.96967e-06	0.000582462
10376	TUBA1B	-1.64738	9.71124	235.822	2.02792e-06	0.000582462
9055	PRC1	-2.12986	7.61965	235.588	2.03444e-06	0.000582462
55872	PBK	-2.06875	5.33542	235.505	2.03674e-06	0.000582462
2491	CENPI	-2.13773	4.82024	233.398	2.09668e-06	0.000582462
83879	CDCA7	-2.36057	4.01288	230.135	2.1941e-06	0.000582462
5982	RFC2	-1.42458	5.67159	229.258	2.22131e-06	0.000582462
891	CCNB1	-1.69229	7.38708	229.164	2.22424e-06	0.000582462
6240	RRM1	-1.3254	6.84502	228.79	2.23598e-06	0.000582462
29127	RACGAP1	-1.8651	7.08061	226.779	2.30057e-06	0.000582462
1869	E2F1	-1.62564	5.25535	226.472	2.31063e-06	0.000582462
55789	DEPDC1B	-2.56616	4.73315	225.416	2.3457e-06	0.000582462
55165	CEP55	-2.16635	5.93781	224.765	2.3677e-06	0.000582462
51514	DTL	-2.1545	4.70472	223.787	2.40121e-06	0.000582462
22974	TPX2	-2.1225	7.66146	220.192	2.52984e-06	0.000582462
1894	ECT2	-1.27639	7.19515	219.552	2.5537e-06	0.000582462
9918	NCAPD2	-1.37504	7.40224	219.413	2.55891e-06	0.000582462
54892	NCAPG2	-1.94359	7.29821	218.61	2.58931e-06	0.000582462
1163	CKS1B	-1.81039	5.01609	217.84	2.61891e-06	0.000582462
55839	CENPN	-1.63096	6.71019	217.002	2.65162e-06	0.000582462
4175	MCM6	-1.67578	7.1965	216.216	2.68281e-06	0.000582462
81611	ANP32E	-1.99663	6.58781	216.102	2.68736e-06	0.000582462
8794	TNFRSF10C	2.63808	4.26109	215.817	2.69881e-06	0.000582462
4176	MCM7	-1.57332	8.32931	213.038	2.81377e-06	0.000588759
79980	DSN1	-1.64965	5.0325	210.969	2.90359e-06	0.000588759
150468	CKAP2L	-2.19472	4.22111	210.803	2.91096e-06	0.000588759
56992	KIF15	-2.37622	4.56631	210.705	2.9153e-06	0.000588759
5347	PLK1	-2.6304	6.67455	210.247	2.93579e-06	0.000588759
221150	SKA3	-2.23827	5.50413	209.883	2.9522e-06	0.000588759
6241	RRM2	-2.20038	8.17014	208.218	3.02884e-06	0.000596036
55010	PARPBP	-1.70285	4.82847	207.465	3.06435e-06	0.000596036
55355	HJURP	-1.49071	5.60021	206.441	3.1135e-06	0.00059821
128239	IQGAP3	-1.75133	6.24857	203.983	3.23578e-06	0.000614213
5983	RFC3	-1.47721	6.3061	202.169	3.33008e-06	0.000624589
6491	STIL	-1.92318	5.27396	200.108	3.44157e-06	0.000637535
4998	ORC1	-2.42802	3.83585	199.417	3.48004e-06	0.000637535
55388	MCM10	-2.2756	5.66775	198.094	3.55527e-06	0.000640256
29089	UBE2T	-1.76983	5.65877	197.733	3.57617e-06	0.000640256
6790	AURKA	-1.81078	6.90573	196.607	3.64239e-06	0.000644785
11004	KIF2C	-2.47137	5.3806	195.283	3.7223e-06	0.000647166
890	CCNA2	-2.45641	6.05778	195.027	3.73799e-06	0.000647166
9787	DLGAP5	-2.53562	5.96991	193.347	3.84325e-06	0.000652304
10592	SMC2	-1.75043	6.34368	193.145	3.85622e-06	0.000652304
341359	SYT10	1.60917	5.1038	192.148	3.9208e-06	0.000652304
83540	NUF2	-2.09159	4.41536	191.011	3.99617e-06	0.000652304
55143	CDCA8	-2.14565	5.17299	190.965	3.99929e-06	0.000652304
54908	SPDL1	-1.70829	5.18831	190.438	4.0349e-06	0.000652304
3015	H2AZ1	-1.23053	8.44403	189.623	4.09083e-06	0.000652304
4174	MCM5	-1.84583	5.8502	189.04	4.13144e-06	0.000652304
4172	MCM3	-1.47249	7.50592	188.914	4.1403e-06	0.000652304
83990	BRIP1	-1.50542	8.54621	187.709	4.22617e-06	0.00065556
990	CDC6	-2.06197	5.41082	186.297	4.32979e-06	0.00065556
5984	RFC4	-1.75611	4.56974	186.217	4.3357e-06	0.00065556
284403	WDR62	-1.76449	5.19631	185.849	4.36336e-06	0.00065556
10535	RNASEH2A	-1.4404	5.30442	185.773	4.36901e-06	0.00065556
1033	CDKN3	-1.9551	5.24813	183.44	4.54968e-06	0.000674029
57650	CIP2A	-1.85412	5.34123	183.09	4.57767e-06	0.000674029
991	CDC20	-2.48458	5.60025	181.889	4.67519e-06	0.000682015
1854	DUT	-1.43056	5.32241	181.301	4.72399e-06	0.000682811
283431	GAS2L3	-1.88662	4.58375	179.379	4.88809e-06	0.000694191
79075	DSCC1	-1.85234	4.74499	179.347	4.89084e-06	0.000694191
79682	CENPU	-2.19239	4.50372	178.473	4.96803e-06	0.00069885
10635	RAD51AP1	-2.18793	4.00806	177.403	5.06459e-06	0.000706129
116028	RMI2	-1.48969	5.86175	175.787	5.21512e-06	0.000710618
63967	CLSPN	-2.00297	4.89084	175.677	5.22562e-06	0.000710618
9837	GINS1	-1.73095	6.09327	175.609	5.2321e-06	0.000710618
9585	KIF20B	-1.48012	5.54938	173.736	5.41475e-06	0.000723636
157313	CDCA2	-2.00496	5.07582	173.686	5.4198e-06	0.000723636
55635	DEPDC1	-2.43466	5.24433	172.13	5.5781e-06	0.000738513
699	BUB1	-2.13644	5.98859	171.172	5.67859e-06	0.000740165
23649	POLA2	-1.77373	5.57949	169.468	5.86313e-06	0.000740165
57405	SPC25	-2.3658	4.10646	169.448	5.86543e-06	0.000740165
23310	NCAPD3	-1.30473	5.67061	169.285	5.88347e-06	0.000740165
9824	ARHGAP11A	-2.32963	6.52244	169.178	5.89537e-06	0.000740165
81610	FAM83D	-1.87352	5.30327	169.115	5.90238e-06	0.000740165
11130	ZWINT	-1.71157	6.75864	168.681	5.95114e-06	0.000740165
29899	GPSM2	-1.15892	6.34128	168.545	5.96642e-06	0.000740165
7913	DEK	-1.29028	8.04531	167.37	6.10132e-06	0.000750986
10125	RASGRP1	1.4375	5.86401	166.401	6.21567e-06	0.000759131
9961	MVP	1.40035	5.77091	164.903	6.39786e-06	0.000769619
54541	DDIT4	1.21531	6.26852	164.892	6.39925e-06	0.000769619
51512	GTSE1	-2.42735	4.9465	163.322	6.59777e-06	0.000787483
1870	E2F2	-1.90935	3.9018	160.831	6.92955e-06	0.000820865
11065	UBE2C	-2.00688	5.96003	160.222	7.01397e-06	0.000820996
11113	CIT	-1.77728	5.6832	160.073	7.03487e-06	0.000820996
51053	GMNN	-1.56972	4.96224	158.369	7.2792e-06	0.000843263
11169	WDHD1	-1.24375	5.76231	155.157	7.77074e-06	0.000893635
10036	CHAF1A	-1.57653	4.73726	152.309	8.24328e-06	0.000927742
10437	IFI30	1.12662	5.91603	152.307	8.24352e-06	0.000927742
3832	KIF11	-2.13987	6.52646	152.12	8.27585e-06	0.000927742
55247	NEIL3	-2.54415	2.97574	151.965	8.30287e-06	0.000927742
5422	POLA1	-1.36517	5.64604	150.295	8.6003e-06	0.00095421
55320	MIS18BP1	-1.41608	6.43932	149.714	8.70686e-06	0.000959277
84515	MCM8	-1.52529	4.77758	149.028	8.83518e-06	0.000966655
157570	ESCO2	-1.9494	5.03568	147.301	9.16902e-06	0.000988679
9088	PKMYT1	-1.74686	5.41228	147.105	9.20803e-06	0.000988679
151246	SGO2	-1.75531	5.39363	146.992	9.2305e-06	0.000988679
23234	DNAJC9	-1.16797	5.84655	146.39	9.35174e-06	0.000988679
79733	E2F8	-2.29973	4.81775	146.111	9.40858e-06	0.000988679
50484	RRM2B	1.1345	8.18158	146.09	9.41301e-06	0.000988679
2176	FANCC	-1.60268	4.39776	145.744	9.48416e-06	0.000989555
55723	ASF1B	-2.0597	6.02603	144.959	9.64842e-06	0.00100007
55038	CDCA4	-1.28827	5.87815	144.258	9.79835e-06	0.00100897
9319	TRIP13	-2.01753	5.47023	143.794	9.89934e-06	0.00101275
79172	CENPO	-1.24302	5.71428	142.654	1.01528e-05	0.0010225
1058	CENPA	-2.06671	4.16525	142.622	1.01602e-05	0.0010225
2030	SLC29A1	-1.31341	5.36202	142.493	1.01893e-05	0.0010225
220047	CCDC83	1.24627	5.22596	141.083	1.05164e-05	0.00104223
6502	SKP2	-1.82399	4.21735	141.075	1.05182e-05	0.00104223
23468	CBX5	-1.26237	8.20165	140.641	1.06216e-05	0.00104447
253714	MMS22L	-1.2974	5.12632	140.426	1.06734e-05	0.00104447
1026	CDKN1A	2.35919	8.99444	140.148	1.07407e-05	0.00104457
5985	RFC5	-1.31703	5.8649	138.945	1.10388e-05	0.00106093
118738	ZNF488	2.43096	3.23504	138.926	1.10437e-05	0.00106093
9700	ESPL1	-2.29776	6.15489	138.637	1.1117e-05	0.0010615
90417	KNSTRN	-1.61598	5.37215	137.611	1.1382e-05	0.00107473
83667	SESN2	1.19076	5.36715	137.574	1.13919e-05	0.00107473
64151	NCAPG	-2.40666	5.32184	137.039	1.15336e-05	0.00107812
9401	RECQL4	-1.46648	5.96489	136.922	1.15647e-05	0.00107812
7298	TYMS	-1.23491	6.35703	135.957	1.1827e-05	0.00109609
8795	TNFRSF10B	1.23087	6.74062	135.698	1.18989e-05	0.0010963
641	BLM	-2.10875	4.99372	135.113	1.20629e-05	0.00110495
10051	SMC4	-1.55245	7.85406	134.738	1.21697e-05	0.00110828
7374	UNG	-1.26687	6.67537	133.596	1.25025e-05	0.00112556
79784	MYH14	0.991647	7.93907	133.393	1.25629e-05	0.00112556
55526	DHTKD1	-1.20039	7.25937	133.357	1.25737e-05	0.00112556
2175	FANCA	-1.59596	6.19543	132.737	1.27607e-05	0.00113585
3146	HMGB1	-1.34803	8.83487	132.383	1.28691e-05	0.00113906
1063	CENPF	-2.40965	6.41698	130.613	1.34297e-05	0.00115903
57122	NUP107	-1.15301	6.60586	130.528	1.34575e-05	0.00115903
10150	MBNL2	1.01082	6.37809	130.225	1.35569e-05	0.00115903
6119	RPA3	-1.45654	5.23001	130.215	1.35601e-05	0.00115903
83461	CDCA3	-2.0081	4.17964	130.138	1.35856e-05	0.00115903
23612	PHLDA3	1.29833	6.20717	130.027	1.36224e-05	0.00115903
1719	DHFR	-1.22225	5.53136	130.024	1.36234e-05	0.00115903
2187	FANCB	-2.4573	2.70249	129.734	1.37199e-05	0.00115903
54478	PIMREG	-2.66761	3.81676	129.624	1.37568e-05	0.00115903
10460	TACC3	-2.00741	6.43694	128.635	1.40941e-05	0.00118113
3181	HNRNPA2B1	-1.04128	10.3658	127.48	1.45023e-05	0.00120891
11073	TOPBP1	-0.990365	6.97212	126.84	1.47351e-05	0.0012166
8208	CHAF1B	-1.70918	4.60631	126.802	1.4749e-05	0.0012166
2189	FANCG	-1.15709	5.41235	126.461	1.48751e-05	0.00122061
3835	KIF22	-1.20342	7.4159	125.799	1.51239e-05	0.0012346
27113	BBC3	1.73362	3.87989	124.928	1.54597e-05	0.0012555
9232	PTTG1	-2.37836	5.09327	124.611	1.55843e-05	0.00125913
5933	RBL1	-1.54072	4.72259	124.247	1.57292e-05	0.00126435
1111	CHEK1	-1.54539	4.81885	123.723	1.59404e-05	0.00127483
4436	MSH2	-1.09682	6.57714	122.414	1.6485e-05	0.00130672
8438	RAD54L	-2.09075	4.13687	122.367	1.65051e-05	0.00130672
8458	TTF2	-0.983425	6.85493	120.997	1.71022e-05	0.00134722
80010	RMI1	-1.33904	5.07355	119.672	1.77067e-05	0.0013879
4193	MDM2	1.12564	8.39476	118.506	1.82616e-05	0.00142431
6560	SLC12A4	2.03887	4.28209	118.033	1.84935e-05	0.0014353
4522	MTHFD1	-1.01245	8.29433	115.312	1.99033e-05	0.0015343
90381	TICRR	-2.39673	5.08396	115.201	1.99639e-05	0.0015343
1017	CDK2	-1.08574	6.40665	112.22	2.16804e-05	0.00165813
114904	C1QTNF6	1.50173	6.07804	111.883	2.18865e-05	0.00166425
64785	GINS3	-1.72082	3.88737	111.745	2.19717e-05	0.00166425
5885	RAD21	-0.893589	9.03132	111.257	2.22758e-05	0.0016767
55345	ZGRF1	-1.43382	4.28371	111.13	2.23561e-05	0.0016767
79801	SHCBP1	-2.23305	4.89771	110.973	2.24553e-05	0.0016767
163786	SASS6	-1.65868	3.75992	110.738	2.26056e-05	0.00167944
126282	TNFAIP8L1	-2.466	2.47641	110.5	2.27589e-05	0.00167944
79968	WDR76	-2.29498	3.90626	110.418	2.28118e-05	0.00167944
2956	MSH6	-0.914867	7.28442	109.687	2.32927e-05	0.0017054
63922	CHTF18	-1.14623	5.13871	109.479	2.34321e-05	0.0017054
9735	KNTC1	-1.01727	6.51732	109.394	2.34892e-05	0.0017054
64946	CENPH	-1.57449	4.27505	108.799	2.38952e-05	0.0017208
84250	SLF1	-1.45444	4.13039	108.764	2.39197e-05	0.0017208
55812	SPATA7	1.22874	4.87316	108.357	2.42024e-05	0.00173322
203068	TUBB	-1.2064	10.2904	107.739	2.46407e-05	0.00175662
348654	GEN1	-1.08019	5.79856	107.485	2.48237e-05	0.0017617
51203	NUSAP1	-2.24356	6.52837	107.25	2.49951e-05	0.00176591
375444	C5orf34	-2.12159	2.90572	106.97	2.52007e-05	0.00177248
4627	MYH9	0.923128	10.1307	106.375	2.56455e-05	0.00179174
5426	POLE	-1.08128	7.17299	106.301	2.57019e-05	0.00179174
355	FAS	1.88527	3.93375	106.092	2.58605e-05	0.00179486
701	BUB1B	-2.01945	5.80206	105.447	2.63599e-05	0.00182149
80119	PIF1	-2.62465	2.50946	104.734	2.69261e-05	0.00185249
11270	NRM	-1.8504	4.17043	104.404	2.71943e-05	0.00186281
10198	MPHOSPH9	-1.18524	5.80898	103.953	2.7565e-05	0.00188003
55835	CENPJ	-1.39619	5.12025	103.801	2.76917e-05	0.00188053
26271	FBXO5	-1.67344	4.93693	103.029	2.83467e-05	0.00191675
63979	FIGNL1	-1.51545	5.35421	102.674	2.86546e-05	0.00192929
2237	FEN1	-1.57709	6.61912	102.11	2.91531e-05	0.0019465
27258	LSM3	-0.907749	6.11025	101.945	2.93007e-05	0.0019465
4796	TONSL	-1.28245	5.29128	101.941	2.93046e-05	0.0019465
29128	UHRF1	-2.06737	5.07677	101.66	2.95584e-05	0.0019465
81930	KIF18A	-2.0962	4.31553	101.621	2.95943e-05	0.0019465
27244	SESN1	1.01598	5.31854	101.459	2.97423e-05	0.0019465
5902	RANBP1	-0.981899	6.24708	101.379	2.98157e-05	0.0019465
5424	POLD1	-1.50243	4.87053	101.288	2.99e-05	0.0019465
55148	UBR7	-0.881835	7.25484	100.96	3.02041e-05	0.0019465
5111	PCNA	-1.35015	6.93769	100.955	3.02093e-05	0.0019465
146956	EME1	-1.94719	3.48221	100.891	3.02692e-05	0.0019465
57082	KNL1	-2.20705	5.72144	100.285	3.08448e-05	0.00197545
5888	RAD51	-1.88321	4.24997	99.7774	3.13377e-05	0.00199889
89958	SAPCD2	-0.992896	6.49746	98.8432	3.22725e-05	0.00205021
5427	POLE2	-1.75227	3.59793	98.3277	3.28039e-05	0.00207561
23594	ORC6	-1.60933	3.77164	97.6567	3.35128e-05	0.00209574
440193	CCDC88C	0.976196	6.06078	97.5917	3.35825e-05	0.00209574
4678	NASP	-1.22339	6.69937	97.5636	3.36126e-05	0.00209574
1763	DNA2	-1.45312	4.79871	97.5251	3.36541e-05	0.00209574
55632	G2E3	-1.10725	5.77121	97.1941	3.40131e-05	0.00210975
653820	FAM72B	-2.52703	2.08465	96.6274	3.46394e-05	0.00213349
2581	GALC	0.952272	7.35272	96.5293	3.47494e-05	0.00213349
139886	SPIN4	-1.31448	4.79022	96.3659	3.49335e-05	0.00213349
2539	G6PD	1.13926	9.85801	96.2908	3.50185e-05	0.00213349
79866	BORA	-1.88054	3.60601	96.1777	3.51472e-05	0.00213349
100128191	TMPO-AS1	-2.2956	3.12144	96.1241	3.52083e-05	0.00213349
730091	LINC00886	1.30899	4.30684	95.9471	3.54112e-05	0.00213756
55157	DARS2	-0.861123	7.17901	95.6554	3.5749e-05	0.00214171
10714	POLD3	-1.26812	5.21092	95.6531	3.57517e-05	0.00214171
10293	TRAIP	-1.87873	3.42841	95.5005	3.59301e-05	0.00214424
83715	ESPN	0.978443	5.72356	95.3237	3.61383e-05	0.00214852
6432	SRSF7	-0.870298	7.46524	95.0692	3.64407e-05	0.00215836
83695	RHNO1	-0.919754	5.61454	94.8938	3.66511e-05	0.00216197
1789	DNMT3B	-1.133	5.13454	94.6193	3.69834e-05	0.00216197
10763	NES	-1.61727	4.25061	94.5888	3.70206e-05	0.00216197
39	ACAT2	-1.08742	5.9765	94.5642	3.70506e-05	0.00216197
7517	XRCC3	-1.29414	5.14782	94.3922	3.72613e-05	0.00216624
727897	MUC5B	1.85514	3.48987	94.0278	3.7713e-05	0.00218444
9133	CCNB2	-2.33995	5.41512	93.0147	3.90069e-05	0.00224258
283209	PGM2L1	1.64372	6.27384	92.9129	3.91401e-05	0.00224258
8836	GGH	-1.55867	4.658	92.9101	3.91438e-05	0.00224258
3838	KPNA2	-1.05949	9.08869	92.7781	3.93174e-05	0.00224437
11099	PTPN21	0.891917	5.91587	92.1233	4.01935e-05	0.0022861
4173	MCM4	-1.32684	8.1703	89.1314	4.45372e-05	0.00252404
11168	PSIP1	-0.988667	6.59869	88.8648	4.49533e-05	0.00253309
2040	STOM	1.19299	7.47353	88.8233	4.50185e-05	0.00253309
55536	CDCA7L	-1.33645	4.9873	88.4657	4.55857e-05	0.00254966
22995	CEP152	-1.7546	3.80741	88.4339	4.56365e-05	0.00254966
54069	MIS18A	-1.30193	4.35365	88.1233	4.61376e-05	0.00256855
1031	CDKN2C	-2.13251	3.44125	87.8313	4.66151e-05	0.00258599
64782	AEN	1.03714	6.37098	86.8786	4.82187e-05	0.00265811
1663	DDX11	-1.00204	5.22112	86.8589	4.82526e-05	0.00265811
79902	NUP85	-0.829721	6.21603	86.5528	4.87836e-05	0.002678
1841	DTYMK	-1.12273	5.38873	86.4396	4.89819e-05	0.00267955
4751	NEK2	-1.95799	4.07872	86.2525	4.93119e-05	0.00268827
22953	P2RX2	1.42442	5.14776	86.1535	4.94877e-05	0.00268855
57326	PBXIP1	0.919817	5.73581	85.9566	4.98397e-05	0.00269837
6426	SRSF1	-0.839727	8.95802	85.858	5.00173e-05	0.00269871
3151	HMGN2	-0.817121	7.36449	85.6312	5.04288e-05	0.00271162
11064	CNTRL	-1.70729	3.91549	85.2997	5.10381e-05	0.00273505
10608	MXD4	0.835435	6.0417	84.5178	5.25141e-05	0.00280461
9833	MELK	-2.01367	5.75022	83.4341	5.46529e-05	0.00290898
7516	XRCC2	-1.5398	4.00227	83.0303	5.54788e-05	0.00294299
259266	ASPM	-2.25971	6.65124	82.7514	5.60588e-05	0.00296378
900	CCNG1	0.839582	7.43236	82.6495	5.62726e-05	0.00296452
10723	SLC12A7	0.861548	5.68011	82.5658	5.64491e-05	0.00296452
201725	C4orf46	-1.30778	4.50523	82.4174	5.67638e-05	0.00296664
115703	ARHGAP33	-1.60489	3.58101	82.3694	5.68661e-05	0.00296664
56852	RAD18	-0.997854	5.18547	81.7107	5.82939e-05	0.00302382
220134	SKA1	-2.2667	3.52291	81.56	5.86273e-05	0.00302382
94239	H2AZ2	-0.819849	7.54516	81.4869	5.87896e-05	0.00302382
581	BAX	0.817161	6.35791	81.4341	5.89075e-05	0.00302382
10765	KDM5B	0.754126	8.83422	81.4277	5.89218e-05	0.00302382
6628	SNRPB	-0.872075	6.90923	81.2741	5.92662e-05	0.00303162
23135	KDM6B	0.910821	6.29798	80.6183	6.07667e-05	0.00309831
8520	HAT1	-0.87393	6.62594	80.1446	6.18813e-05	0.00314497
64105	CENPK	-1.8175	4.42572	79.8959	6.24774e-05	0.00316505
26154	ABCA12	1.83428	5.9491	79.5758	6.32553e-05	0.00319419
83903	HASPIN	-1.78204	3.15337	78.8023	6.51882e-05	0.00328128
7443	VRK1	-0.926507	5.6534	78.7198	6.53989e-05	0.0032814
262	AMD1	-0.899718	6.96308	78.2626	6.65826e-05	0.00332257
81620	CDT1	-1.38525	5.53385	78.2403	6.66412e-05	0.00332257
4521	NUDT1	-1.29839	3.97172	78.1369	6.69131e-05	0.0033256
3251	HPRT1	-0.792568	6.26306	77.9944	6.72902e-05	0.00333383
3014	H2AX	-1.51432	6.49752	77.8721	6.76159e-05	0.00333946
29980	DONSON	-1.23382	4.4572	77.7888	6.7839e-05	0.00334001
142	PARP1	-0.836012	7.71181	77.3566	6.90121e-05	0.00338186
57103	TIGAR	0.971393	6.10651	77.3179	6.91184e-05	0.00338186
7398	USP1	-1.2145	6.60592	77.105	6.97072e-05	0.00339348
995	CDC25C	-2.28255	3.54951	77.0186	6.99481e-05	0.00339348
5931	RBBP7	-0.740181	8.17786	76.9555	7.01245e-05	0.00339348
8839	CCN5	1.46528	6.88846	76.9224	7.02175e-05	0.00339348
1786	DNMT1	-0.86752	7.49291	76.6256	7.1057e-05	0.00342356
55755	CDK5RAP2	-0.847622	6.33703	76.2227	7.22179e-05	0.00346722
54058	C21orf58	-1.26232	4.81002	76.1261	7.25001e-05	0.00346722
10721	POLQ	-1.57525	4.99675	76.084	7.26235e-05	0.00346722
6749	SSRP1	-0.844406	7.2717	75.8092	7.34353e-05	0.00349325
10038	PARP2	-1.069	5.85577	75.6694	7.3853e-05	0.00349325
23306	NEMP1	-0.811738	5.68139	75.6328	7.39628e-05	0.00349325
3070	HELLS	-1.47717	5.46864	75.4169	7.46149e-05	0.00349325
9994	CASP8AP2	-1.06534	5.90425	75.414	7.46236e-05	0.00349325
79915	ATAD5	-1.75878	3.52249	75.4068	7.46455e-05	0.00349325
10541	ANP32B	-0.771172	8.40309	75.3821	7.47207e-05	0.00349325
2146	EZH2	-1.21863	6.00392	75.1064	7.55662e-05	0.0035127
23595	ORC3	-1.04315	5.48776	75.1011	7.55828e-05	0.0035127
79102	RNF26	-0.916612	5.69577	74.9689	7.59926e-05	0.00351459
147841	SPC24	-1.79005	2.74031	74.8827	7.62613e-05	0.00351459
595	CCND1	1.03322	9.71402	74.8564	7.63436e-05	0.00351459
868	CBLB	0.920171	5.28815	74.8015	7.65157e-05	0.00351459
11339	OIP5	-1.97878	3.17876	74.3287	7.80191e-05	0.00356948
387103	CENPW	-2.13095	3.55626	74.2457	7.82872e-05	0.00356948
113791	PIK3IP1	1.50714	3.3693	74.2138	7.83904e-05	0.00356948
348235	SKA2	-0.953331	7.71303	73.8558	7.95615e-05	0.00360527
54800	KLHL24	1.28931	4.89672	73.8339	7.9634e-05	0.00360527
79017	GGCT	-0.78538	6.72241	73.6559	8.02255e-05	0.00362164
440081	NA	-1.51742	3.47948	73.4323	8.09766e-05	0.0036451
59	ACTA2	2.33087	4.18368	73.2273	8.16735e-05	0.003666
54962	TIPIN	-1.40695	3.56649	72.6964	8.35149e-05	0.003738
808	CALM3	-0.830926	8.04103	72.5629	8.39863e-05	0.00374845
91687	CENPL	-1.23733	4.27129	72.4391	8.44264e-05	0.00375745
23636	NUP62	-0.782331	6.42723	71.8446	8.65835e-05	0.0038426
4288	MKI67	-2.37255	8.25941	71.727	8.70188e-05	0.00385107
84823	LMNB2	-0.887033	6.72716	71.582	8.75592e-05	0.00386413
9937	DCLRE1A	-1.2065	4.44637	71.4483	8.80613e-05	0.00387544
145508	CEP128	-1.72737	3.11158	71.3679	8.83652e-05	0.00387798
57819	LSM2	-0.881676	5.30028	71.2267	8.89021e-05	0.0038907
404093	CUEDC1	1.12701	5.9103	70.5449	9.15552e-05	0.00399571
8726	EED	-0.836486	5.32645	70.4157	9.20696e-05	0.00400072
10772	SRSF10	-0.703015	7.25904	70.3886	9.21778e-05	0.00400072
6118	RPA2	-0.88623	5.39542	70.2207	9.28528e-05	0.00401894
25886	POC1A	-1.25493	4.00507	70.0993	9.33448e-05	0.00401902
79622	SNRNP25	-0.828367	5.94708	70.0435	9.35724e-05	0.00401902
6427	SRSF2	-0.79928	8.0568	70.0033	9.37365e-05	0.00401902
26999	CYFIP2	0.832913	6.48304	69.9695	9.38749e-05	0.00401902
2091	FBL	-0.766213	6.94579	69.8198	9.44909e-05	0.00402593
54107	POLE3	-0.707659	7.52248	69.805	9.4552e-05	0.00402593
7086	TKT	0.733838	8.9254	69.7445	9.48029e-05	0.00402593
5328	PLAU	1.81501	3.9489	69.1289	9.74035e-05	0.00412525
93323	HAUS8	-1.28534	3.79238	69.0317	9.78227e-05	0.00413189
79892	MCMBP	-0.748709	6.79092	68.802	9.88224e-05	0.00416296
1647	GADD45A	1.39361	3.71739	68.7211	9.91777e-05	0.00416678
100288637	NA	-1.72563	3.18871	68.6052	9.96893e-05	0.00417714
23165	NUP205	-0.80551	7.56801	68.4067	0.000100574	0.00420304
84722	PSRC1	-1.03855	5.2259	68.3334	0.000100903	0.00420564
55706	NDC1	-1.11243	5.80524	68.2559	0.000101253	0.00420909
9156	EXO1	-1.99424	4.78486	67.8122	0.000103286	0.00428228
9738	CCP110	-0.71297	6.51008	67.605	0.000104253	0.00431105
23658	LSM5	-0.757263	6.29177	67.3903	0.000105268	0.00434162
9355	LHX2	-2.00355	2.07364	66.5048	0.000109593	0.00450818
79944	L2HGDH	-0.951726	5.45621	66.314	0.000110555	0.00453592
84904	ARHGEF39	-1.83841	3.52039	66.1568	0.000111356	0.00455692
1293	COL6A3	2.16492	1.99085	65.5432	0.000114555	0.00467568
10957	PNRC1	0.741399	6.138	65.4429	0.00011509	0.00468523
9201	DCLK1	1.60861	4.48655	65.3879	0.000115384	0.00468523
78995	HROB	-1.56633	3.00504	64.8728	0.000118189	0.0047868
53349	ZFYVE1	0.918345	5.46325	64.7291	0.000118987	0.0047876
5547	PRCP	-0.874373	5.27795	64.729	0.000118988	0.0047876
1503	CTPS1	-0.76967	6.07252	64.7053	0.00011912	0.0047876
3976	LIF	2.28322	2.92554	64.4423	0.000120602	0.00483482
728833	FAM72D	-2.37049	1.95629	64.1547	0.000122249	0.00488188
55603	TENT5A	0.814373	6.89436	64.1088	0.000122515	0.00488188
538	ATP7A	0.861332	5.05347	64.076	0.000122705	0.00488188
81691	REXO5	-1.27222	3.88037	63.8472	0.000124044	0.0049227
26227	PHGDH	-1.1785	5.2536	63.2613	0.000127559	0.00504948
25798	BRI3	1.11193	4.48725	63.1487	0.00012825	0.00506409
5365	PLXNB3	0.880974	5.48662	63.0305	0.000128979	0.00508017
5493	PPL	0.844593	7.75154	62.9587	0.000129425	0.00508503
9126	SMC3	-0.782335	6.75349	62.8424	0.000130152	0.00509577
3985	LIMK2	0.766794	5.62105	62.8116	0.000130346	0.00509577
5757	PTMA	-0.923526	10.0936	62.5287	0.000132139	0.00515309
122769	LRR1	-1.16057	5.0984	62.4396	0.000132711	0.0051626
6492	SIM1	-3.11136	2.74522	62.235	0.000134035	0.00519862
84930	MASTL	-1.46081	5.8226	62.195	0.000134296	0.00519862
26010	SPATS2L	0.818006	6.91577	61.8016	0.000136899	0.0052692
23421	ITGB3BP	-1.58232	3.27224	61.7745	0.000137081	0.0052692
7283	TUBG1	-0.746707	6.27214	61.7682	0.000137123	0.0052692
8317	CDC7	-1.27446	4.51816	61.6586	0.000137861	0.00528468
5393	EXOSC9	-1.05619	4.58409	61.0322	0.000142182	0.00543585
9128	PRPF4	-0.673966	6.51308	60.9878	0.000142495	0.00543585
8971	H1-10	-0.933262	6.51411	60.8809	0.000143252	0.00545153
8487	GEMIN2	-1.15026	4.19668	60.6936	0.000144591	0.00548621
1434	CSE1L	-0.648184	8.64803	60.616	0.00014515	0.00548621
85444	LRRCC1	-1.00534	4.50807	60.56	0.000145556	0.00548621
414149	ACBD7	-1.20141	4.67279	60.56	0.000145556	0.00548621
148327	CREB3L4	-0.788239	5.34358	60.4434	0.000146405	0.00550505
26509	MYOF	0.645222	9.52214	60.2822	0.00014759	0.00553129
3619	INCENP	-1.45011	5.87599	60.2531	0.000147805	0.00553129
25788	RAD54B	-1.18923	5.33497	59.9511	0.000150063	0.00559874
5652	PRSS8	0.792637	7.30611	59.9173	0.000150318	0.00559874
54821	ERCC6L	-2.42287	4.24687	59.7954	0.000151244	0.00561993
79668	PARP8	0.974588	4.55127	59.595	0.000152783	0.00566374
56890	MDM1	-1.16191	3.91777	59.5076	0.00015346	0.00567551
3978	LIG1	-1.15825	6.07482	59.362	0.000154598	0.00568979
57655	GRAMD1A	0.796741	6.01423	59.3166	0.000154954	0.00568979
9980	DOP1B	0.977462	7.48054	59.3092	0.000155012	0.00568979
23204	ARL6IP1	-0.779015	8.95969	59.2739	0.000155291	0.00568979
4361	MRE11	-0.919	4.69932	59.0975	0.000156692	0.00572533
51377	UCHL5	-0.690975	5.92956	59.0604	0.000156988	0.00572533
7027	TFDP1	-0.795343	7.13105	58.8438	0.000158735	0.00577569
64858	DCLRE1B	-1.0408	7.16535	58.5658	0.000161014	0.0058451
51065	RPS27L	1.13127	6.74353	58.5141	0.000161443	0.0058472
54535	CCHCR1	-1.25223	3.82806	58.0753	0.000165141	0.00596741
23404	EXOSC2	-0.710047	5.93319	57.7723	0.000167759	0.00604814
7468	NSD2	-0.864301	7.61917	57.5662	0.00016957	0.00609949
29984	RHOD	0.810284	6.17909	57.4318	0.000170765	0.00611083
3476	IGBP1	0.75128	6.27252	57.3769	0.000171257	0.00611083
145270	PRIMA1	-2.57195	1.54446	57.3623	0.000171388	0.00611083
1643	DDB2	0.756053	6.83515	57.28	0.000172129	0.00611083
3674	ITGA2B	-2.00443	2.042	57.2719	0.000172202	0.00611083
10728	PTGES3	-0.632944	8.9235	57.2707	0.000172213	0.00611083
9656	MDC1	-0.967314	6.3174	57.2045	0.000172812	0.00611181
23225	NUP210	-0.678108	7.72384	57.1711	0.000173115	0.00611181
3930	LBR	-1.0308	6.01374	57.1394	0.000173404	0.00611181
100506994	PTPRG-AS1	-1.41867	3.63201	57.0696	0.000174042	0.00612061
5965	RECQL	-0.81367	5.44567	56.9503	0.000175139	0.00614548
399668	SMIM10L2A	2.10744	1.53833	56.5987	0.000178425	0.00624685
84131	CEP78	-0.929627	4.70019	56.4688	0.00017966	0.00626612
101927861	NA	1.03584	5.40406	56.4525	0.000179815	0.00626612
132660	LIN54	-0.797902	5.23288	56.4155	0.000180168	0.00626612
56941	HMCES	-0.665474	6.72026	56.13	0.000182932	0.00634821
80174	DBF4B	-1.33228	3.59393	55.7579	0.000186615	0.00646179
93594	TBC1D31	-1.25079	3.80766	55.5523	0.000188692	0.00650847
23623	RUSC1	-0.638353	6.69384	55.5427	0.000188789	0.00650847
7422	VEGFA	1.09863	6.08155	55.4235	0.000190008	0.0065328
7791	ZYX	0.716356	7.34068	55.3927	0.000190324	0.0065328
84790	TUBA1C	-0.768233	8.56459	55.2166	0.000192148	0.00657886
54946	SLC41A3	0.821069	5.45989	55.1827	0.000192501	0.00657886
1186	CLCN7	0.698253	6.27913	55.0586	0.000193803	0.00659504
84140	FAM161A	-1.52654	2.97589	55.0578	0.000193812	0.00659504
64710	NUCKS1	-0.642165	10.4438	54.812	0.000196424	0.0066643
64793	CEP85	-0.912011	4.76788	54.7869	0.000196693	0.0066643
79672	FN3KRP	-0.724806	5.41859	54.6734	0.000197917	0.0066914
55166	CENPQ	-1.36589	3.30311	54.5505	0.000199254	0.00672216
2870	GRK6	-0.672439	6.04429	54.2686	0.000202364	0.00681248
6324	SCN1B	0.994377	4.34201	54.1815	0.000203338	0.00682009
84296	GINS4	-1.31059	3.73476	54.171	0.000203456	0.00682009
219790	RTKN2	-1.31645	3.67384	54.0957	0.000204303	0.00683394
5612	THAP12	-0.66903	6.53577	53.9925	0.000205471	0.00685848
7328	UBE2H	0.645328	7.38362	53.9366	0.000206108	0.00686519
5355	PLP2	-0.697375	6.64996	53.8598	0.000206988	0.00687994
729533	FAM72A	-2.1396	2.44436	53.7628	0.000208105	0.00690252
6302	TSPAN31	0.864234	5.52821	53.3818	0.00021257	0.00703581
2799	GNS	0.843861	8.58112	53.1111	0.000215819	0.00712837
10432	RBM14	-1.27738	6.17969	52.9467	0.000217823	0.0071702
2717	GLA	-0.685019	6.03713	52.9216	0.000218132	0.0071702
4363	ABCC1	0.654315	6.86986	52.8612	0.000218876	0.0071702
10212	DDX39A	-0.681079	6.32266	52.8587	0.000218906	0.0071702
6282	S100A11	0.714094	9.59217	52.7261	0.000220552	0.00720911
26115	TANC2	0.687952	8.70169	52.6619	0.000221355	0.00722037
83463	MXD3	-1.41015	3.44716	52.5727	0.000222475	0.00724194
899	CCNF	-1.46679	5.54581	52.4523	0.000224	0.00727655
80223	RAB11FIP1	0.697452	6.73931	52.3489	0.00022532	0.00730436
5672	PSG4	2.48156	2.47641	52.29	0.000226077	0.00731386
27075	TSPAN13	-0.676445	7.83547	52.2355	0.00022678	0.00732155
993	CDC25A	-1.57644	3.63963	52.185	0.000227435	0.00732401
26579	MYEOV	1.943	1.92163	52.1322	0.000228121	0.00732401
10606	PAICS	-0.748865	8.1202	52.1223	0.000228251	0.00732401
2512	FTL	0.636949	8.18254	52.0442	0.000229272	0.00733061
494115	RBMXL1	-1.05247	3.9546	52.0354	0.000229387	0.00733061
79723	SUV39H2	-0.945679	4.94636	51.9367	0.000230687	0.00735724
26586	CKAP2	-0.862431	7.06254	51.8593	0.000231713	0.00737503
2752	GLUL	0.639658	8.67677	51.7538	0.00023312	0.00740486
64342	HS1BP3	1.25925	5.20394	51.665	0.000234315	0.00741085
4957	ODF2	-0.690558	6.70492	51.6512	0.000234501	0.00741085
51330	TNFRSF12A	0.746177	7.15357	51.6143	0.000235001	0.00741085
27085	MTBP	-1.29659	3.24406	51.597	0.000235234	0.00741085
6626	SNRPA	-0.67394	6.04089	51.5656	0.000235661	0.00741085
151176	ERFE	-2.18463	1.47135	51.4593	0.000237112	0.00744163
8479	HIRIP3	-0.887368	5.30373	51.2601	0.000239861	0.00751295
55959	SULF2	0.794922	10.3138	51.1792	0.000240991	0.00753334
124222	PAQR4	-0.68742	5.80945	51.1012	0.000242085	0.00753517
6117	RPA1	-0.64734	7.14937	51.0817	0.000242359	0.00753517
54985	HCFC1R1	1.00492	5.62681	51.0464	0.000242858	0.00753517
56937	PMEPA1	0.970063	7.97691	51.039	0.000242962	0.00753517
5932	RBBP8	-0.744689	5.92664	50.972	0.000243912	0.00754451
84973	SNHG7	1.01022	5.99246	50.9349	0.000244441	0.00754451
1736	DKC1	-0.59971	7.37319	50.8735	0.000245317	0.00754451
113174	SAAL1	-1.136	4.01104	50.8569	0.000245556	0.00754451
51645	PPIL1	-0.637203	5.98733	50.8465	0.000245705	0.00754451
5476	CTSA	0.653901	7.71378	50.8165	0.000246136	0.00754451
580	BARD1	-1.08273	5.12942	50.6737	0.000248201	0.00759304
6632	SNRPD1	-0.777039	6.10383	50.5483	0.000250034	0.00763426
102724250	NA	0.696813	5.70524	50.4955	0.00025081	0.00764315
80179	MYO19	-0.815276	5.87046	50.4536	0.000251429	0.00764722
1509	CTSD	1.42393	10.6635	50.3835	0.000252468	0.00766403
161145	TMEM229B	1.25749	4.66247	50.326	0.000253325	0.00767527
10572	SIVA1	-0.99986	5.72805	50.235	0.000254689	0.00770178
3012	H2AC8	1.49037	3.89684	50.1608	0.000255807	0.00772077
9631	NUP155	-0.801017	6.29022	49.9582	0.000258896	0.00779886
10613	ERLIN1	-0.659298	5.68009	49.9264	0.000259384	0.00779886
3837	KPNB1	-0.631223	8.75766	49.7818	0.000261625	0.00783448
55013	MCUB	-1.14659	4.15576	49.7664	0.000261864	0.00783448
2896	GRN	0.686329	8.55661	49.7538	0.000262061	0.00783448
3182	HNRNPAB	-0.642083	8.72827	49.6581	0.000263561	0.0078644
11335	CBX3	-0.611813	8.91854	49.4825	0.000266341	0.00790986
79960	JADE1	-1.12814	4.53626	49.4385	0.000267043	0.00790986
53820	RIPPLY3	-1.544	2.644	49.4285	0.000267204	0.00790986
266722	HS6ST3	0.704742	5.59936	49.4277	0.000267216	0.00790986
57415	C3orf14	-0.744209	7.31223	49.3913	0.0002678	0.00790986
84958	SYTL1	0.978273	4.87464	49.3728	0.000268097	0.00790986
8408	ULK1	1.16122	8.02634	49.2124	0.000270692	0.0079679
3033	HADH	-0.78505	5.67874	49.1887	0.000271079	0.0079679
2934	GSN	1.58009	7.23873	49.1579	0.000271581	0.0079679
5702	PSMC3	-0.602457	7.68805	49.1095	0.000272375	0.00797633
27101	CACYBP	-0.713792	6.9999	48.9939	0.000274279	0.0080172
55213	RCBTB1	0.931824	5.69667	48.9306	0.000275331	0.00803304
8844	KSR1	1.09285	3.68903	48.7495	0.000278368	0.00810662
901	CCNG2	0.752648	6.55991	48.7057	0.000279108	0.00811318
7485	GET1	-0.620135	6.07959	48.4732	0.000283083	0.00821359
6277	S100A6	0.964547	6.50303	48.3665	0.000284934	0.00825208
84986	ARHGAP19	-0.979597	4.41793	48.2865	0.000286331	0.00827732
3635	INPP5D	3.01693	0.554887	48.2564	0.000286858	0.00827737
5019	OXCT1	-0.877658	5.76213	48.2253	0.000287405	0.008278
338651	KRTAP5-AS1	1.17958	5.00985	48.1086	0.000289468	0.00832221
6877	TAF5	-1.19728	3.66259	47.9933	0.000291527	0.00836613
9411	ARHGAP29	0.84152	5.33869	47.9125	0.00029298	0.00839256
23433	RHOQ	0.718608	6.60306	47.6818	0.000297183	0.00849751
56942	CMC2	-0.684673	6.00645	47.5458	0.000299698	0.00855387
23053	ZSWIM8	0.763403	6.46985	47.419	0.000302066	0.00860588
91057	CCDC34	-1.32813	3.65974	47.3652	0.000303079	0.00861916
80150	ASRGL1	-1.55442	3.65681	47.2217	0.000305801	0.00866002
2289	FKBP5	-0.95214	5.44571	47.1878	0.000306451	0.00866002
23380	SRGAP2	-0.835154	6.18472	47.1747	0.000306701	0.00866002
84057	MND1	-1.52355	2.99966	47.174	0.000306715	0.00866002
1471	CST3	0.659936	7.03262	47.1024	0.000308089	0.00868326
10452	TOMM40	-0.688988	6.58438	47.0638	0.000308835	0.00868875
442075	NA	-0.845256	4.67541	47.0158	0.000309764	0.00869713
2355	FOSL2	0.747533	7.13741	46.9915	0.000310237	0.00869713
285753	CEP57L1	-1.24854	3.19069	46.7825	0.000314336	0.00879638
6434	TRA2B	-0.903416	7.43027	46.6166	0.00031764	0.00887309
222183	SRRM3	1.05958	4.1404	46.4636	0.000320727	0.00890436
79805	VASH2	-1.85343	1.85908	46.4634	0.000320732	0.00890436
10528	NOP56	-0.596326	6.76425	46.4384	0.000321239	0.00890436
64168	NECAB1	1.00429	6.56241	46.4274	0.000321464	0.00890436
55972	SLC25A40	-0.649962	5.58063	46.4214	0.000321586	0.00890436
6428	SRSF3	-0.825955	8.42085	46.3253	0.000323552	0.00894309
27346	TMEM97	-0.669234	6.19567	46.1487	0.000327207	0.00902827
100505641	FGD5-AS1	-0.618224	8.16634	46.0865	0.000328507	0.00904829
84061	MAGT1	-0.581004	6.96549	46.0156	0.000329995	0.00907342
6949	TCOF1	-0.735935	6.58851	45.9336	0.00033173	0.00910525
3005	H1-0	-0.652849	8.36727	45.8848	0.000332767	0.00911781
1164	CKS2	-0.729317	5.88944	45.7346	0.000335987	0.00919006
57697	FANCM	-0.882456	4.6423	45.5144	0.000340782	0.00929711
9755	TBKBP1	1.11161	3.53478	45.5008	0.000341081	0.00929711
10857	PGRMC1	-0.58542	7.40008	45.3211	0.000345066	0.0093895
11198	SUPT16H	-0.627504	8.88151	45.2622	0.000346385	0.00940144
100131211	NEMP2	-1.40725	2.69003	45.2482	0.000346699	0.00940144
23178	PASK	-1.01565	5.00305	45.2127	0.000347498	0.00940417
55120	FANCL	-0.982175	4.34271	45.1908	0.000347993	0.00940417
23555	TSPAN15	0.724988	7.50681	45.077	0.000350574	0.0094577
966	CD59	0.567921	8.09858	45.0156	0.000351978	0.00947934
54832	VPS13C	0.788783	5.56169	44.7734	0.000357588	0.00960603
29893	PSMC3IP	-1.36815	3.38091	44.7197	0.000358847	0.00960603
157285	PRAG1	1.15467	4.47576	44.7106	0.000359061	0.00960603
5889	RAD51C	-0.598182	7.64882	44.6909	0.000359525	0.00960603
3570	IL6R	1.81982	2.04277	44.6822	0.000359731	0.00960603
2547	XRCC6	-0.620868	8.51545	44.5897	0.00036192	0.00963224
32	ACACB	-1.33191	3.16693	44.5696	0.000362399	0.00963224
8243	SMC1A	-0.678666	7.91181	44.5634	0.000362546	0.00963224
11340	EXOSC8	-0.982425	4.88622	44.372	0.000367143	0.00973637
89839	ARHGAP11B	-1.92115	1.94402	44.349	0.000367702	0.00973637
84695	LOXL3	-1.73485	2.37684	44.2637	0.000369779	0.00977495
54830	NUP62CL	-2.44588	1.44244	44.2062	0.000371188	0.00979576
8878	SQSTM1	0.841635	8.71188	44.0961	0.000373904	0.00985093
253635	GPATCH11	-0.992215	4.24267	44.0619	0.000374753	0.00985682
94241	TP53INP1	1.41612	7.56025	44.0197	0.000375807	0.00986806
55135	WRAP53	-1.03636	4.01163	43.9558	0.000377407	0.00989358
389	RHOC	0.662244	8.18436	43.7743	0.000381998	0.00999731
29781	NCAPH2	-0.907384	4.89799	43.7024	0.000383838	0.0100108
10388	SYCP2	-0.749548	5.61011	43.6726	0.000384603	0.0100108
115752	DIS3L	-0.78533	4.90575	43.6561	0.000385029	0.0100108
196463	PLBD2	0.643699	6.00694	43.655	0.000385057	0.0100108
79888	LPCAT1	0.680401	8.74703	43.6201	0.000385955	0.0100177
10951	CBX1	-0.572977	8.03984	43.5572	0.000387588	0.0100396
9221	NOLC1	-0.633979	7.73055	43.5162	0.000388654	0.0100396
3184	HNRNPD	-0.915183	7.67395	43.514	0.000388712	0.0100396
10465	PPIH	-0.872873	4.29108	43.427	0.000390989	0.0100819
7019	TFAM	-0.620426	6.23751	43.362	0.000392703	0.0101095
223	ALDH9A1	-0.631118	6.1397	43.2345	0.000396094	0.0101701
9518	GDF15	2.37925	6.19398	43.192	0.000397232	0.0101701
92106	OXNAD1	-1.02212	4.42337	43.1861	0.000397389	0.0101701
147798	TMC4	0.859008	5.868	43.1769	0.000397637	0.0101701
79993	ELOVL7	-0.76184	6.23018	43.0692	0.000400544	0.0102278
164091	PAQR7	1.43399	2.65738	42.9877	0.000402764	0.0102679
100294145	NA	-0.792562	4.64782	42.7869	0.0004083	0.0103922
197335	WDR90	-0.792395	4.67679	42.7609	0.000409022	0.0103938
7804	LRP8	-0.675141	5.31588	42.721	0.000410138	0.0104054
51162	EGFL7	0.762166	4.74452	42.674	0.000411455	0.0104119
7184	HSP90B1	-0.545604	9.30931	42.6609	0.000411823	0.0104119
1723	DHODH	-1.09548	3.58622	42.6288	0.000412726	0.0104119
55256	ADI1	-0.645305	7.2631	42.6177	0.00041304	0.0104119
7586	ZKSCAN1	0.596044	8.29655	42.5606	0.000414658	0.010436
54626	HES2	1.59404	3.08543	42.4734	0.000417141	0.0104627
2271	FH	-0.581223	5.91842	42.4441	0.00041798	0.0104627
4355	MPP2	-1.36826	2.82156	42.4307	0.000418364	0.0104627
151354	LRATD1	0.978967	6.82373	42.4215	0.000418628	0.0104627
360	AQP3	0.826553	6.25458	42.4072	0.000419039	0.0104627
54858	PGPEP1	1.01007	5.55801	42.3834	0.000419725	0.0104633
84319	CMSS1	-0.844795	5.0289	42.2903	0.000422421	0.0105035
10236	HNRNPR	-0.574452	7.80166	42.2572	0.000423384	0.0105035
6637	SNRPG	-0.695147	5.91342	42.2571	0.000423386	0.0105035
51060	TXNDC12	-0.691154	5.57061	42.2358	0.000424008	0.0105035
340485	ACER2	1.10034	4.64068	42.1416	0.000426772	0.0105344
1936	EEF1D	0.539531	8.73327	42.1285	0.000427158	0.0105344
27338	UBE2S	-1.2941	4.77548	42.1008	0.000427977	0.0105344
1984	EIF5A	-0.539371	8.58501	42.092	0.000428237	0.0105344
11257	NA	0.987463	4.48863	42.0798	0.000428597	0.0105344
51537	MTFP1	-1.01645	4.00358	41.982	0.000431508	0.0105894
953	ENTPD1	1.55024	2.67885	41.9315	0.000433022	0.01061
440145	MZT1	-1.09866	4.7166	41.8811	0.000434538	0.0106152
410	ARSA	1.03596	3.82247	41.8741	0.000434751	0.0106152
166336	PRICKLE2	0.981338	6.80095	41.8399	0.000435784	0.0106152
55159	RFWD3	-0.782394	7.05451	41.8092	0.000436714	0.0106152
675	BRCA2	-1.68049	5.49292	41.7917	0.000437245	0.0106152
55705	IPO9	-0.593582	6.81271	41.7908	0.000437274	0.0106152
113115	MTFR2	-1.52336	3.30468	41.7401	0.000438818	0.0106203
83596	BCL2L12	-0.98947	3.95995	41.7397	0.000438831	0.0106203
64222	TOR3A	-0.661085	6.35344	41.6275	0.000442277	0.0106872
124093	CCDC78	0.770695	4.6777	41.3378	0.000451339	0.0108895
140707	BRI3BP	-1.01188	4.87547	41.2601	0.000453808	0.0109323
29952	DPP7	0.628591	6.41197	41.141	0.00045763	0.0109988
60491	NIF3L1	-0.684912	5.40384	41.1307	0.000457963	0.0109988
64429	ZDHHC6	-0.672509	5.36768	40.9692	0.000463219	0.0111081
22948	CCT5	-0.591592	9.23031	40.9181	0.000464898	0.0111314
81853	TMEM14B	-0.587869	5.85986	40.8307	0.000467789	0.0111836
54982	CLN6	-0.727931	5.39169	40.7639	0.000470014	0.0112092
79586	CHPF	0.73016	6.6756	40.7559	0.000470282	0.0112092
7037	TFRC	-0.619291	8.89343	40.6699	0.000473167	0.0112609
55732	C1orf112	-1.24646	4.74882	40.6077	0.000475271	0.011294
4292	MLH1	-0.589327	5.82555	40.5016	0.000478887	0.0113627
57695	USP37	-0.854565	5.85037	40.4796	0.000479638	0.0113635
55561	CDC42BPG	0.712395	6.42612	40.4547	0.000480494	0.0113667
6809	STX3	0.991167	6.58076	40.4105	0.000482017	0.0113856
730101	NA	-1.29615	2.97395	40.2371	0.000488055	0.0115012
57116	ZNF695	-1.68735	2.34149	40.228	0.000488374	0.0115012
51184	GPN3	-0.899277	4.47727	40.1807	0.000490039	0.0115232
51545	ZNF581	1.05535	4.44635	40.1418	0.000491412	0.0115383
63901	FAM111A	-0.56864	5.94603	40.1078	0.000492618	0.0115494
29085	PHPT1	0.574996	6.43066	40.0403	0.000495023	0.0115812
7739	ZNF185	0.541124	7.10974	40.0285	0.000495444	0.0115812
4670	HNRNPM	-0.790262	7.9083	39.9738	0.000497408	0.0116022
10902	BRD8	-0.556565	6.38587	39.939	0.000498663	0.0116022
23590	PDSS1	-0.874777	4.06029	39.9192	0.000499377	0.0116022
219287	AMER2	1.77369	4.24562	39.9141	0.000499563	0.0116022
3094	HINT1	-0.757835	6.80637	39.9013	0.000500026	0.0116022
10189	ALYREF	-0.726749	6.51862	39.8797	0.000500807	0.0116032
79019	CENPM	-1.68294	3.27834	39.7294	0.000506302	0.0117012
11059	WWP1	0.55721	8.61915	39.7234	0.000506521	0.0117012
192111	PGAM5	-0.5493	6.55179	39.6578	0.000508946	0.01174
6286	S100P	1.25941	5.13663	39.5381	0.000513408	0.0118257
57572	DOCK6	0.637323	6.35393	39.4921	0.000515136	0.0118349
1903	S1PR3	1.22832	6.26223	39.4874	0.000515312	0.0118349
159090	PABIR2	-0.673798	7.21979	39.3478	0.000520608	0.011922
1938	EEF2	0.533316	11.4038	39.3475	0.000520618	0.011922
9060	PAPSS2	1.2979	6.6441	39.322	0.000521594	0.011927
6839	SUV39H1	-1.3068	4.42365	39.2469	0.000524478	0.0119756
57447	NDRG2	-1.05258	3.63949	39.1643	0.000527675	0.0120311
7371	UCK2	-0.77734	5.28342	39.1261	0.000529159	0.0120476
3306	HSPA2	-1.34065	3.173	39.0784	0.000531026	0.0120616
4094	MAF	2.25555	2.77768	39.0712	0.000531306	0.0120616
652995	NA	1.87134	3.42726	38.9409	0.000536445	0.0121607
7508	XPC	0.583388	6.80876	38.9066	0.000537809	0.0121741
55142	HAUS2	-0.838702	4.55771	38.721	0.000545266	0.0122999
83481	EPPK1	0.582134	6.44527	38.7103	0.000545701	0.0122999
64841	GNPNAT1	-0.59143	7.5851	38.7101	0.000545708	0.0122999
51602	NOP58	-0.667012	6.90042	38.5744	0.000551254	0.0124072
5528	PPP2R5D	-0.59298	5.91084	38.4994	0.000554348	0.012459
3880	KRT19	0.530338	11.0953	38.4311	0.000557188	0.0124899
9793	CKAP5	-0.53595	8.31543	38.4282	0.000557311	0.0124899
79071	ELOVL6	-0.990984	5.73402	38.3848	0.000559122	0.0125127
60674	GAS5	0.681659	7.83629	38.2939	0.000562948	0.0125805
83719	YPEL3	0.528887	6.63743	38.2135	0.000566359	0.0126257
51776	MAP3K20	-0.58116	6.03675	38.1904	0.000567345	0.0126257
54677	CROT	0.626652	5.43487	38.1897	0.000567376	0.0126257
29093	MRPL22	-0.700271	5.07454	38.146	0.000569244	0.0126494
51258	MRPL51	-0.547725	6.79078	38.07	0.000572519	0.0127005
2710	GK	-1.54391	1.91002	38.0464	0.000573538	0.0127005
2553	GABPB1	-0.607789	5.5005	38.0193	0.000574711	0.0127005
1351	COX8A	-0.524096	7.15182	38.0181	0.000574765	0.0127005
100093630	NA	0.728968	5.34451	37.9992	0.000575588	0.0127008
10444	ZER1	0.529003	6.49091	37.8479	0.000582219	0.0128128
10493	VAT1	0.831844	7.67854	37.8463	0.000582289	0.0128128
3913	LAMB2	0.547058	7.7456	37.8133	0.000583749	0.012827
91010	FMNL3	-1.2691	3.4179	37.7406	0.000586984	0.0128801
81624	DIAPH3	-0.858296	4.88691	37.6836	0.000589535	0.0129181
7056	THBD	1.98256	5.60662	37.5739	0.000594487	0.0130085
6392	SDHD	-0.572765	5.60043	37.508	0.000597483	0.013056
50628	GEMIN4	-0.717029	5.35574	37.4895	0.000598329	0.0130563
5810	RAD1	-0.614636	5.47727	37.4115	0.000601915	0.0131035
9110	MTMR4	-0.562191	7.07994	37.4063	0.000602155	0.0131035
8148	TAF15	-0.536775	7.18357	37.2763	0.000608192	0.0132134
57674	RNF213	0.555945	7.98348	37.2616	0.00060888	0.0132134
23129	PLXND1	0.537951	8.11733	37.2225	0.000610713	0.0132349
55191	NADSYN1	0.683381	6.61474	37.2031	0.000611627	0.0132365
55646	LYAR	-0.933268	4.60605	37.1025	0.000616389	0.0133213
2872	MKNK2	0.801872	6.29663	36.9549	0.000623461	0.0134514
9149	DYRK1B	0.898156	4.6518	36.9413	0.000624119	0.0134514
84844	PHF5A	-0.707841	5.13475	36.9196	0.000625168	0.0134556
8727	CTNNAL1	-0.874365	5.11763	36.7612	0.000632904	0.0136036
3955	LFNG	0.62393	5.20265	36.6752	0.000637159	0.0136645
9410	SNRNP40	-0.811226	4.92936	36.6688	0.000637475	0.0136645
29843	SENP1	-0.61847	5.78348	36.6347	0.000639172	0.0136823
201255	LRRC45	-0.704453	4.99049	36.6012	0.000640845	0.0136995
54453	RIN2	0.976629	3.76053	36.5468	0.000643575	0.0137268
79875	THSD4	0.899532	6.28388	36.5311	0.00064437	0.0137268
10971	YWHAQ	-0.521512	8.87921	36.5238	0.000644737	0.0137268
23435	TARDBP	-0.529381	7.76733	36.5019	0.000645841	0.0137317
9125	CNOT9	-0.620361	6.08263	36.4407	0.000648946	0.0137792
10274	STAG1	-0.577691	6.48952	36.3977	0.000651138	0.0137927
8573	CASK	0.558219	6.45195	36.3874	0.000651663	0.0137927
51566	ARMCX3	0.579139	6.93678	36.3713	0.000652487	0.0137927
5901	RAN	-0.530959	9.2007	36.3597	0.000653085	0.0137927
1745	DLX1	-0.895465	4.11437	36.2713	0.000657636	0.0138671
85442	KNDC1	1.06172	3.90465	36.2572	0.000658366	0.0138671
9026	HIP1R	0.556967	6.37767	36.1469	0.000664116	0.0139695
27165	GLS2	1.09178	3.15366	35.9667	0.000673652	0.0141512
92521	SPECC1	0.681991	6.70416	35.9469	0.00067471	0.0141545
1154	CISH	1.13068	5.2254	35.9265	0.000675805	0.0141586
7011	TEP1	0.636422	5.61135	35.9064	0.000676884	0.0141624
343099	CCDC18	-1.47539	2.91137	35.8854	0.000678012	0.0141672
10055	SAE1	-0.540219	7.51575	35.861	0.000679328	0.0141759
11043	MID2	0.52442	6.79669	35.8325	0.000680869	0.0141893
7372	UMPS	-0.53504	6.21427	35.7324	0.00068632	0.014284
65003	MRPL11	-0.584059	5.91558	35.6978	0.000688218	0.0143046
58480	RHOU	0.545247	5.71226	35.6744	0.0006895	0.0143124
162681	C18orf54	-1.66567	3.16859	35.6327	0.000691804	0.0143245
25759	SHC2	1.39086	2.56633	35.6308	0.000691906	0.0143245
55238	SLC38A7	0.936559	4.52563	35.6014	0.000693535	0.0143394
147015	DHRS13	-0.900869	3.88652	35.4394	0.0007026	0.0145078
7366	UGT2B15	1.65587	4.87195	35.3918	0.000705289	0.0145443
23354	HAUS5	-0.923284	4.14574	35.3536	0.000707464	0.0145701
8355	H3C8	-1.53441	1.72367	35.3277	0.000708941	0.0145814
6659	SOX4	0.747174	8.18471	35.2716	0.000712151	0.0146284
3899	AFF3	1.26009	3.84614	35.2429	0.0007138	0.0146297
55266	TMEM19	-0.765162	5.11688	35.2381	0.000714076	0.0146297
2907	GRINA	0.57197	8.16122	35.2147	0.000715429	0.0146384
93134	ZNF561	0.59694	5.60776	35.1369	0.000719941	0.0147116
254263	CNIH2	-1.09135	3.04292	35.1012	0.000722023	0.0147351
8821	INPP4B	0.94378	6.96213	35.0348	0.000725917	0.0147787
22941	SHANK2	0.705628	5.8932	35.0157	0.000727044	0.0147787
3482	IGF2R	0.528873	7.63969	35.0123	0.000727246	0.0147787
11144	DMC1	-1.94686	1.44251	34.9874	0.000728717	0.0147787
51274	KLF3	0.587365	5.92911	34.9851	0.000728851	0.0147787
10383	TUBB4B	-0.753101	8.97551	34.9481	0.000731047	0.0147899
23096	IQSEC2	0.710306	4.70188	34.9441	0.000731282	0.0147899
3187	HNRNPH1	-0.516926	9.09647	34.9187	0.000732797	0.0148016
109	ADCY3	-0.862695	5.216	34.7994	0.000739948	0.0149269
25804	LSM4	-0.509001	6.42849	34.741	0.000743488	0.0149281
8125	ANP32A	-0.620113	7.09373	34.7399	0.00074355	0.0149281
6635	SNRPE	-0.526038	6.63183	34.7362	0.000743779	0.0149281
2618	GART	-0.535495	6.70407	34.7358	0.000743799	0.0149281
26470	SEZ6L2	0.598223	7.34534	34.5383	0.000755927	0.0151522
55572	FOXRED1	-0.718894	4.64227	34.5193	0.000757111	0.0151566
388403	YPEL2	0.896017	5.76637	34.4804	0.000759535	0.0151859
100506538	NA	1.5229	2.76756	34.3038	0.000770667	0.0153889
54948	MRPL16	-0.702098	5.17693	34.2351	0.000775053	0.0154569
79023	NUP37	-0.643076	5.07668	34.2182	0.000776137	0.015459
79654	HECTD3	0.601756	5.78023	34.18	0.000778596	0.0154884
308	ANXA5	-0.598394	7.73784	34.1597	0.000779911	0.015495
26150	RIBC2	-1.75152	1.88159	34.0804	0.000785056	0.0155461
9984	THOC1	-0.704516	4.68669	34.0756	0.000785367	0.0155461
79621	RNASEH2B	-1.00116	4.40943	34.052	0.000786914	0.0155461
694	BTG1	0.561805	7.3633	34.0487	0.000787131	0.0155461
3189	HNRNPH3	-0.550295	7.65282	34.0442	0.00078742	0.0155461
29074	MRPL18	-0.642399	5.10665	34.0292	0.000788403	0.0155461
54820	NDE1	-0.936688	5.04159	33.9227	0.000795428	0.0156403
79989	TTC26	-1.13318	3.29842	33.9166	0.000795834	0.0156403
219	ALDH1B1	-0.650004	4.93694	33.9116	0.000796161	0.0156403
51251	NT5C3A	-0.561988	5.6037	33.792	0.000804157	0.0157777
11051	NUDT21	-0.58868	7.18556	33.7049	0.000810047	0.0158735
81542	TMX1	-0.493898	6.91346	33.6002	0.000817194	0.0159937
221393	ADGRF4	1.84943	2.56277	33.5763	0.000818842	0.016006
401505	TOMM5	-0.62769	5.9148	33.4312	0.000828913	0.0161828
4758	NEU1	0.649589	6.80905	33.3715	0.000833107	0.0162446
10762	NUP50	-0.606892	6.1578	33.3523	0.000834456	0.0162501
9675	TTI1	-0.563707	5.58542	33.3382	0.000835456	0.0162501
22924	MAPRE3	0.834061	4.78396	33.2986	0.000838262	0.0162846
409	ARRB2	-0.704814	4.98179	33.2693	0.000840343	0.0162912
9446	GSTO1	-0.723998	4.88435	33.2647	0.000840671	0.0162912
23279	NUP160	-0.661191	7.11681	33.1063	0.000852062	0.0164917
6470	SHMT1	-0.672948	6.02517	33.08	0.00085397	0.0165083
7533	YWHAH	-0.580345	7.14719	33.0401	0.000856882	0.0165443
27125	AFF4	0.507667	8.11516	32.9504	0.000863467	0.0166511
64770	CCDC14	-0.645643	6.06562	32.9089	0.000866542	0.01667
55002	TMCO3	0.554355	5.69908	32.8983	0.000867327	0.01667
221491	SMIM29	0.882081	3.7443	32.8943	0.000867625	0.01667
26136	TES	0.540818	6.06308	32.8665	0.000869692	0.0166894
3107	HLA-C	0.820349	6.32498	32.7875	0.000875605	0.0167824
399815	NA	-1.44796	1.92389	32.6682	0.000884629	0.0169348
5608	MAP2K6	-1.67584	1.69167	32.5997	0.000889871	0.0169994
53371	NUP54	-0.638466	5.69681	32.5959	0.000890164	0.0169994
7343	UBTF	-0.523914	7.60015	32.5686	0.000892262	0.0170189
9274	BCL7C	-0.730121	5.17641	32.5485	0.000893813	0.0170278
50809	HP1BP3	-0.517669	7.4847	32.5309	0.000895174	0.0170332
57621	ZBTB2	-0.699079	5.63533	32.487	0.000898575	0.017063
116461	TSEN15	-0.594133	5.404	32.4827	0.000898907	0.017063
60386	SLC25A19	-0.928553	3.81298	32.4147	0.000904221	0.0171037
9143	SYNGR3	0.791153	4.13217	32.405	0.000904981	0.0171037
8837	CFLAR	0.546792	5.67385	32.3957	0.000905707	0.0171037
29941	PKN3	-1.00041	3.83164	32.3887	0.000906259	0.0171037
6196	RPS6KA2	1.32682	4.72006	32.3859	0.000906478	0.0171037
126382	NR2C2AP	-0.60869	5.06614	32.3642	0.000908186	0.0171126
5296	PIK3R2	0.489332	7.53035	32.3468	0.00090956	0.0171126
79073	TMEM109	-0.849731	6.52017	32.326	0.000911204	0.0171126
11200	CHEK2	-0.78757	4.58796	32.3249	0.000911296	0.0171126
7884	SLBP	-0.938481	6.02305	32.311	0.000912392	0.0171128
933	CD22	1.47412	1.81865	32.2575	0.000916647	0.0171456
9052	GPRC5A	1.09962	8.04246	32.2532	0.00091699	0.0171456
8886	DDX18	-0.489569	7.2297	32.248	0.000917408	0.0171456
8000	PSCA	1.48018	4.33729	32.1784	0.000922986	0.0172104
129303	TMEM150A	0.896017	4.38382	32.1775	0.000923061	0.0172104
286827	TRIM59	-0.978669	4.46901	32.1236	0.000927415	0.0172625
23589	CARHSP1	-0.693773	6.23999	32.1158	0.000928045	0.0172625
26471	NUPR1	2.32497	0.42197	32.058	0.000932749	0.0173146
54472	TOLLIP	0.758279	4.96077	32.025	0.000935448	0.0173146
93145	OLFM2	0.957151	4.03449	32.0178	0.00093604	0.0173146
1633	DCK	-0.743955	5.28302	31.9978	0.000937677	0.0173146
2178	FANCE	-1.03315	3.37244	31.9967	0.000937772	0.0173146
11343	MGLL	1.60783	6.87689	31.9946	0.000937939	0.0173146
5017	OVOL1	1.03377	5.26588	31.9772	0.000939378	0.0173146
30	ACAA1	0.50436	6.19429	31.974	0.000939638	0.0173146
8624	PSMG1	-0.543478	5.78979	31.9453	0.000942008	0.017338
4603	MYBL1	-1.00423	4.85404	31.9236	0.000943803	0.0173508
84705	GTPBP3	-0.828299	4.2971	31.8969	0.000946016	0.0173712
8089	YEATS4	-0.724048	4.81489	31.8385	0.000950888	0.0174403
55326	AGPAT5	-0.497073	6.13488	31.8196	0.000952472	0.0174491
18	ABAT	0.704186	7.13592	31.8008	0.000954052	0.0174577
6223	RPS19	0.591807	9.03195	31.7155	0.000961254	0.0175572
113802	HENMT1	-0.62145	6.15232	31.7101	0.000961717	0.0175572
10153	CEBPZ	-0.517349	6.41202	31.6758	0.000964639	0.0175902
55627	SMPD4	-0.623273	6.80566	31.6283	0.000968699	0.0176314
55270	NUDT15	-0.690718	5.1461	31.6232	0.000969137	0.0176314
9572	NR1D1	1.29093	2.98749	31.5723	0.000973517	0.0176906
23030	KDM4B	0.601779	5.18592	31.5571	0.00097483	0.0176941
3608	ILF2	-0.579275	8.44689	31.4759	0.000981881	0.0178015
55110	MAGOHB	-1.00894	4.26266	31.41	0.000987648	0.0178831
64067	NPAS3	0.901223	3.6247	31.3987	0.000988649	0.0178831
81631	MAP1LC3B	0.56102	7.22776	31.3853	0.000989827	0.0178838
3149	HMGB3	-0.816479	8.03756	31.3595	0.000992107	0.0179045
127262	TPRG1L	0.731269	5.62216	31.3283	0.000994871	0.0179299
6525	SMTN	-0.586545	5.3508	31.3057	0.000996876	0.0179299
9394	HS6ST1	0.63764	6.40229	31.3052	0.000996925	0.0179299
148206	ZNF714	-0.935611	4.6737	31.2818	0.000999011	0.0179469
5536	PPP5C	-0.538766	6.0776	31.2484	0.001002	0.0179801
23450	SF3B3	-0.623422	8.94618	31.1543	0.00101048	0.0181116
9564	BCAR1	0.555948	6.72592	31.0859	0.0010167	0.0182024
164668	APOBEC3H	2.19699	0.72442	31.067	0.00101843	0.0182126
51043	ZBTB7B	0.494931	6.64732	31.0422	0.0010207	0.0182326
79022	TMEM106C	-0.537908	7.80615	31.0271	0.00102208	0.0182366
24	ABCA4	2.26364	3.13102	30.9918	0.00102533	0.0182739
286467	FIRRE	-1.5111	1.6418	30.9685	0.00102749	0.0182801
55337	SHFL	1.35828	2.16481	30.9554	0.00102871	0.0182801
19	ABCA1	1.1251	5.38982	30.9505	0.00102916	0.0182801
9324	HMGN3	-0.679111	5.744	30.9314	0.00103093	0.0182909
429	ASCL1	1.34639	3.97478	30.9158	0.00103239	0.0182961
10755	GIPC1	0.468708	7.3268	30.8673	0.00103692	0.0183557
54939	COMMD4	-0.562992	5.719	30.7871	0.00104446	0.0184201
93081	TEX30	-1.23235	3.57749	30.7843	0.00104473	0.0184201
5198	PFAS	-0.59179	5.15601	30.7807	0.00104508	0.0184201
79003	MIS12	-0.593153	5.7721	30.7744	0.00104567	0.0184201
3257	HPS1	0.796573	5.51596	30.7667	0.0010464	0.0184201
55559	HAUS7	-0.961885	4.20119	30.736	0.00104932	0.0184477
988	CDC5L	-0.486799	6.64544	30.7188	0.00105095	0.0184477
57149	LYRM1	0.576905	5.18844	30.7126	0.00105154	0.0184477
65109	UPF3B	-0.909445	5.10028	30.701	0.00105265	0.0184477
8697	CDC23	-0.49188	6.47426	30.6582	0.00105675	0.0184646
196513	DCP1B	0.951237	3.99325	30.654	0.00105715	0.0184646
51182	HSPA14	-0.580825	6.03442	30.6515	0.00105739	0.0184646
64073	C19orf33	1.07402	4.24453	30.6421	0.0010583	0.0184646
79145	CHCHD7	-0.836916	3.73699	30.597	0.00106265	0.01852
22929	SEPHS1	-0.540241	7.12525	30.5645	0.0010658	0.0185544
79083	MLPH	0.665947	8.86173	30.5177	0.00107036	0.0185944
10912	GADD45G	1.53831	2.11726	30.5166	0.00107046	0.0185944
4254	KITLG	0.723273	7.35737	30.501	0.00107199	0.0186005
7351	UCP2	0.765646	6.81309	30.4255	0.00107941	0.0187086
132864	CPEB2	0.668323	5.26528	30.3991	0.00108202	0.0187197
56204	FAM214A	0.673487	6.797	30.395	0.00108243	0.0187197
89765	RSPH1	1.28982	2.64409	30.3483	0.00108707	0.0187794
9682	KDM4A	0.476941	6.44282	30.3141	0.00109048	0.0188177
51318	MRPL35	-0.520126	5.86196	30.2758	0.00109433	0.0188509
8934	RAB29	0.808797	6.1491	30.2629	0.00109563	0.0188509
2182	ACSL4	-1.44359	3.30847	30.2592	0.001096	0.0188509
375791	CYSRT1	1.56225	3.42702	30.2354	0.00109839	0.0188715
5998	RGS3	-0.765012	4.71894	30.1586	0.00110619	0.0189847
101928687	LNCAROD	0.532866	5.92509	30.1449	0.00110758	0.018988
130271	PLEKHH2	-0.737618	4.53177	30.1069	0.00111147	0.0190339
101927002	NA	1.56643	1.4327	30.055	0.00111681	0.0190889
85379	KIAA1671	0.52764	6.37086	30.0454	0.0011178	0.0190889
26012	NSMF	0.504697	6.77539	30.0405	0.00111831	0.0190889
135293	PM20D2	-0.740199	4.87969	29.9978	0.00112274	0.0191437
2037	EPB41L2	-0.724593	5.26687	29.9406	0.00112871	0.0192153
610	HCN2	0.582283	5.48009	29.9297	0.00112984	0.0192153
307	ANXA4	0.64914	6.65004	29.9225	0.0011306	0.0192153
79924	ADM2	1.37149	2.41984	29.9098	0.00113193	0.0192172
256126	SYCE2	-2.10783	0.897213	29.8281	0.00114055	0.0193392
79598	CEP97	-0.9375	3.86811	29.8186	0.00114157	0.0193392
55071	C9orf40	-1.17238	2.99129	29.8048	0.00114304	0.0193401
132320	SCLT1	-1.0067	3.15088	29.7943	0.00114415	0.0193401
9885	OSBPL2	0.477689	7.10943	29.7834	0.00114531	0.0193401
817	CAMK2D	0.618882	5.39753	29.6695	0.00115754	0.0195169
23193	GANAB	-0.481701	9.03081	29.6629	0.00115826	0.0195169
26020	LRP10	0.519653	8.49362	29.6328	0.00116152	0.0195511
9811	CTIF	0.84065	4.06768	29.5577	0.00116972	0.019668
23475	QPRT	0.733487	7.17233	29.5352	0.00117218	0.0196885
57488	ESYT2	0.505218	8.07336	29.52	0.00117386	0.0196956
8605	PLA2G4C	1.33231	2.14671	29.5073	0.00117526	0.0196981
84885	ZDHHC12	-0.519571	5.81577	29.4392	0.0011828	0.0198035
51133	KCTD3	-0.473786	7.5359	29.4238	0.00118452	0.0198111
2041	EPHA1	0.616102	5.07838	29.3989	0.0011873	0.0198366
284992	CCDC150	-1.41059	2.28961	29.356	0.0011921	0.0198957
824	CAPN2	1.31337	4.19463	29.3058	0.00119776	0.019969
80346	REEP4	-0.617982	5.5424	29.2667	0.00120219	0.0200217
91433	RCCD1	-0.682891	4.7818	29.2383	0.00120542	0.0200511
11091	WDR5	-0.45771	6.93119	29.2289	0.0012065	0.0200511
85007	PHYKPL	0.698159	5.15091	29.1807	0.00121202	0.0200904
10682	EBP	-0.829349	5.72661	29.1769	0.00121245	0.0200904
55890	GPRC5C	0.842973	5.85867	29.1664	0.00121366	0.0200904
2309	FOXO3	0.534241	6.71122	29.1637	0.00121397	0.0200904
25914	RTTN	-1.07795	3.03391	29.127	0.00121821	0.0201394
22821	RASA3	0.890987	5.45955	29.1122	0.00121991	0.0201455
55299	BRIX1	-0.49091	5.77083	29.0917	0.00122229	0.0201455
493869	GPX8	-0.919227	3.34464	29.0907	0.00122241	0.0201455
2202	EFEMP1	-0.953969	5.22966	29.0719	0.00122459	0.0201604
56243	KIAA1217	1.03587	5.3147	28.9515	0.00123871	0.0203715
1384	CRAT	-1.44992	3.08296	28.9339	0.00124079	0.0203845
57659	ZBTB4	0.451002	7.24299	28.9024	0.00124453	0.0204246
3191	HNRNPL	-0.456555	8.07145	28.841	0.00125185	0.0205046
116832	RPL39L	-0.994112	3.23121	28.8245	0.00125383	0.0205046
9819	TSC22D2	0.528652	6.11355	28.8083	0.00125578	0.0205046
9423	NTN1	1.19935	4.12347	28.803	0.00125642	0.0205046
8609	KLF7	0.678319	4.83421	28.792	0.00125774	0.0205046
2760	GM2A	0.614261	5.40859	28.7862	0.00125845	0.0205046
4683	NBN	-0.460377	7.87588	28.7697	0.00126044	0.0205046
55281	TMEM140	1.51529	2.37433	28.758	0.00126185	0.0205046
89122	TRIM4	0.623549	5.66695	28.7548	0.00126224	0.0205046
9746	CLSTN3	0.78127	5.26751	28.7446	0.00126347	0.0205046
9185	REPS2	0.702727	4.6728	28.7425	0.00126372	0.0205046
57701	NCKAP5L	0.609689	5.30381	28.7286	0.00126541	0.0205109
8329	H2AC13	1.10949	3.04227	28.7032	0.00126851	0.0205238
54498	SMOX	1.59495	1.49081	28.7006	0.00126882	0.0205238
79184	BRCC3	-0.568792	6.16687	28.6463	0.00127547	0.0206103
55743	CHFR	0.487649	5.9271	28.6277	0.00127775	0.0206259
79153	GDPD3	0.467312	6.19833	28.6075	0.00128024	0.0206288
23767	FLRT3	1.07838	3.70294	28.5948	0.00128181	0.0206288
84449	ZNF333	1.24436	2.72259	28.5944	0.00128185	0.0206288
5097	PCDH1	0.506069	5.67183	28.5721	0.00128461	0.020652
55744	COA1	-0.504697	5.76705	28.5453	0.00128793	0.0206844
441027	TMEM150C	0.563451	6.25652	28.4948	0.00129424	0.0207492
10105	PPIF	-0.543004	6.31278	28.4919	0.0012946	0.0207492
100506119	LINC01503	1.32772	2.6273	28.4611	0.00129846	0.0207899
6634	SNRPD3	-0.537267	7.17735	28.4503	0.00129981	0.0207904
55164	SHQ1	-0.638434	4.64893	28.4133	0.00130449	0.0208384
80208	SPG11	0.505992	6.13543	28.4056	0.00130546	0.0208384
2023	ENO1	-0.466716	10.1731	28.3833	0.00130828	0.0208623
1660	DHX9	-0.588039	8.86889	28.3718	0.00130974	0.0208644
5577	PRKAR2B	-0.595647	5.18648	28.3011	0.00131876	0.0209869
1975	EIF4B	0.476172	9.9769	28.2055	0.00133109	0.0211358
5912	RAP2B	0.492182	6.20611	28.1993	0.00133189	0.0211358
5796	PTPRK	0.579332	8.30643	28.1852	0.00133373	0.0211358
80020	FOXRED2	-0.683918	5.87928	28.1831	0.001334	0.0211358
84318	CCDC77	-1.08315	2.67881	28.1676	0.00133602	0.0211358
23508	TTC9	0.618909	5.44919	28.1665	0.00133616	0.0211358
51433	ANAPC5	-0.471707	7.53507	28.1429	0.00133924	0.0211632
29960	MRM2	-0.548626	5.91213	28.0854	0.00134679	0.0212514
101927746	NA	-1.22873	2.27924	28.0709	0.00134871	0.0212514
23654	PLXNB2	0.571823	8.3909	28.0697	0.00134887	0.0212514
256302	NATD1	1.63596	3.5735	28.0464	0.00135194	0.021263
101927457	NA	2.55789	3.42733	28.0189	0.0013556	0.021263
4218	RAB8A	-0.584452	6.75697	28.0163	0.00135594	0.021263
114876	OSBPL1A	0.609762	5.08636	28.0068	0.0013572	0.021263
100130449	GPC1-AS1	1.00874	4.85163	27.993	0.00135904	0.021263
4214	MAP3K1	0.640264	7.11256	27.9915	0.00135923	0.021263
80178	TEDC2	-0.940647	3.5587	27.9847	0.00136014	0.021263
5981	RFC1	-0.474394	6.42036	27.9828	0.0013604	0.021263
7979	SEM1	-0.512783	6.51031	27.9443	0.00136555	0.0212987
100506696	PCAT6	1.73976	1.70182	27.9366	0.00136659	0.0212987
23241	PACS2	0.448076	7.50008	27.9355	0.00136674	0.0212987
3313	HSPA9	-0.444398	9.35367	27.8981	0.00137176	0.0213558
11151	CORO1A	0.518362	5.96714	27.8225	0.00138201	0.0214942
55722	CEP72	-0.942881	3.0908	27.7443	0.00139273	0.0216395
214	ALCAM	0.568323	8.4745	27.6569	0.00140482	0.0218045
7247	TSN	-0.439242	7.23343	27.6476	0.00140611	0.0218045
7059	THBS3	0.837689	5.80542	27.6221	0.00140967	0.0218381
7301	TYRO3	-0.684635	4.60096	27.601	0.00141263	0.0218557
54801	HAUS6	-0.674132	5.29053	27.5889	0.00141433	0.0218557
3	A2MP1	2.40158	1.61876	27.5778	0.00141589	0.0218557
120	ADD3	-1.12014	4.63401	27.5615	0.00141818	0.0218557
80315	CPEB4	0.755656	5.36095	27.5615	0.00141818	0.0218557
445	ASS1	0.894395	5.60806	27.5548	0.00141913	0.0218557
25874	MPC2	-0.56318	5.20185	27.5428	0.00142082	0.0218603
56155	TEX14	-0.930595	4.76562	27.485	0.00142901	0.02193
79447	PAGR1	-0.48337	6.61937	27.4842	0.00142913	0.02193
2079	ERH	-0.483764	7.44077	27.4815	0.00142952	0.02193
9895	TECPR2	0.485616	5.79613	27.465	0.00143187	0.0219447
100422943	MIR3189	2.28066	0.138355	27.4499	0.00143403	0.0219564
201895	SMIM14	0.468761	7.79035	27.4354	0.0014361	0.0219582
10492	SYNCRIP	-0.458552	8.8491	27.4296	0.00143694	0.0219582
7764	ZNF217	0.643909	9.77283	27.368	0.0014458	0.0220722
144406	CFAP251	1.19627	2.31599	27.3122	0.00145389	0.0221742
9635	CLCA2	2.47556	1.10438	27.2833	0.00145811	0.0222172
1152	CKB	0.730129	4.96296	27.2664	0.00146058	0.0222271
5558	PRIM2	-0.828359	4.47241	27.251	0.00146284	0.0222271
441478	NRARP	-0.627044	4.75798	27.2499	0.001463	0.0222271
79983	POF1B	0.591004	5.2025	27.2034	0.00146984	0.0222992
729082	OIP5-AS1	-0.494476	5.72338	27.1985	0.00147057	0.0222992
90427	BMF	0.590116	5.59273	27.1687	0.00147498	0.0223279
10131	TRAP1	-0.440976	7.41121	27.1551	0.00147699	0.0223279
55240	STEAP3	0.726259	5.59365	27.1413	0.00147904	0.0223279
6382	SDC1	0.452699	7.19626	27.1391	0.00147938	0.0223279
8407	TAGLN2	-0.453912	8.39862	27.1379	0.00147955	0.0223279
144455	E2F7	-1.29377	4.9448	27.0976	0.00148557	0.0223877
2099	ESR1	-0.480213	8.3032	27.0923	0.00148636	0.0223877
1969	EPHA2	1.01104	5.81397	27.0664	0.00149024	0.0224162
23511	NUP188	-0.597269	7.45761	27.0608	0.0014911	0.0224162
3068	HDGF	-0.440873	9.33998	27.0077	0.00149911	0.0225152
84661	DPY30	-0.481615	5.9615	26.9538	0.0015073	0.0226167
286826	LIN9	-0.867546	3.80624	26.9444	0.00150874	0.0226168
5962	RDX	0.508572	8.43348	26.9095	0.00151408	0.0226749
587	BCAT2	-0.541866	5.1394	26.8944	0.00151641	0.0226749
86	ACTL6A	-0.448574	6.4084	26.8909	0.00151694	0.0226749
64374	SIL1	0.483181	5.85098	26.8698	0.00152019	0.0227021
56943	ENY2	-0.471778	6.51469	26.8577	0.00152207	0.0227085
3795	KHK	-1.01151	3.5085	26.8401	0.00152478	0.0227124
3673	ITGA2	0.588272	5.65648	26.8286	0.00152657	0.0227124
1573	CYP2J2	-0.928842	3.41829	26.8201	0.00152789	0.0227124
51382	ATP6V1D	0.577568	6.3497	26.8135	0.0015289	0.0227124
10994	ILVBL	-0.563404	5.31189	26.8022	0.00153068	0.0227124
25904	CNOT10	-0.596249	5.32811	26.7992	0.00153114	0.0227124
5436	POLR2G	-0.512305	6.30035	26.791	0.00153242	0.0227124
5993	RFX5	0.493771	6.61752	26.7645	0.00153655	0.0227488
4325	MMP16	-0.729234	6.2648	26.7568	0.00153776	0.0227488
91607	SLFN11	-0.667817	4.67494	26.7183	0.0015438	0.0227986
5154	PDGFA	0.660078	4.88358	26.7169	0.00154402	0.0227986
727	C5	-1.16422	4.09284	26.695	0.00154747	0.0228096
10741	RBBP9	-0.620635	5.24523	26.693	0.0015478	0.0228096
3425	IDUA	0.737641	4.41911	26.6846	0.00154911	0.0228096
92154	MTSS2	0.461168	7.65861	26.6705	0.00155135	0.0228212
3338	DNAJC4	0.767436	4.30579	26.654	0.00155396	0.0228383
399665	FAM102A	0.827074	8.8439	26.6372	0.00155663	0.0228562
79624	ARMT1	-0.671326	8.30511	26.622	0.00155906	0.0228706
51087	YBX2	-0.819891	4.93987	26.5873	0.0015646	0.0229305
79612	NAA16	-0.621896	4.80719	26.5674	0.00156779	0.0229559
100506428	CBR3-AS1	1.0122	4.40807	26.5337	0.00157323	0.0229996
268	AMH	-0.996146	2.77071	26.5308	0.00157369	0.0229996
2171	FABP5	-1.93646	1.52755	26.5053	0.00157781	0.0230312
60598	KCNK15	0.835191	4.91626	26.4993	0.00157878	0.0230312
6726	SRP9	-0.431743	7.65798	26.482	0.00158158	0.0230507
51390	AIG1	-0.595595	4.86046	26.4009	0.00159484	0.0232225
55893	ZNF395	-0.464933	5.8343	26.2758	0.00161555	0.0235023
51015	ISOC1	-0.458563	7.81198	26.265	0.00161736	0.0235069
57688	ZSWIM6	0.629196	5.40503	26.2504	0.0016198	0.0235207
7262	PHLDA2	0.82318	4.35088	26.2362	0.00162219	0.0235337
4897	NRCAM	0.568221	8.83507	26.2203	0.00162486	0.0235452
2050	EPHB4	0.542518	7.88984	26.2137	0.00162597	0.0235452
25926	NOL11	-0.428531	7.67229	26.1785	0.00163191	0.0235536
91252	SLC39A13	0.697751	4.64543	26.1778	0.00163203	0.0235536
5794	PTPRH	2.52468	0.319454	26.1666	0.00163393	0.0235536
5725	PTBP1	-0.50803	8.19004	26.1649	0.00163422	0.0235536
3866	KRT15	0.77654	4.36385	26.1589	0.00163523	0.0235536
4835	NQO2	-0.634842	4.62457	26.1572	0.00163552	0.0235536
401934	RNF223	0.784819	3.71584	26.1383	0.00163874	0.0235784
134548	SOWAHA	-2.46361	0.203364	26.1201	0.00164184	0.0236015
9080	CLDN9	0.697085	5.84636	26.1056	0.00164431	0.0236154
5678	PSG9	2.10347	4.29024	26.0284	0.00165757	0.0237842
26272	FBXO4	-1.05263	3.32049	25.9971	0.00166299	0.0238403
28978	TMEM14A	-0.801699	4.68865	25.9636	0.00166882	0.0238851
151556	GPR155	0.860584	3.34243	25.9616	0.00166916	0.0238851
51692	CPSF3	-0.439261	6.45752	25.9069	0.00167872	0.0240003
1826	DSCAM	0.931476	7.12188	25.8853	0.00168253	0.0240329
79035	NABP2	-0.531234	5.16833	25.8046	0.00169681	0.0242149
102724615	NA	0.857652	3.60289	25.7791	0.00170136	0.0242579
2733	GLE1	-0.446118	6.81962	25.7593	0.00170491	0.0242744
51593	SRRT	-0.567301	7.54543	25.7554	0.0017056	0.0242744
494143	CHAC2	-1.17255	3.28982	25.7311	0.00170997	0.0242932
5820	NA	0.575763	5.42202	25.7287	0.0017104	0.0242932
25939	SAMHD1	-0.510291	5.38737	25.7224	0.00171155	0.0242932
51729	WBP11	-0.435503	6.80679	25.6868	0.00171796	0.0243514
4722	NDUFS3	-0.488293	6.27559	25.6825	0.00171874	0.0243514
5208	PFKFB2	0.712132	5.42458	25.6245	0.00172929	0.0244633
51163	DBR1	-0.60411	4.80611	25.622	0.00172974	0.0244633
10622	POLR3G	-1.05348	2.80841	25.5849	0.00173654	0.0245164
101927789	NA	1.6133	2.48367	25.5845	0.00173661	0.0245164
53836	GPR87	1.63416	2.84729	25.5388	0.00174501	0.0246129
2842	GPR19	-2.17038	0.492658	25.4838	0.00175521	0.0247036
5271	SERPINB8	1.38619	1.64235	25.4792	0.00175606	0.0247036
51174	TUBD1	-0.748769	6.86995	25.471	0.0017576	0.0247036
9725	TMEM63A	0.806425	5.88036	25.4704	0.00175771	0.0247036
58499	ZNF462	0.715723	4.61394	25.4559	0.00176042	0.0247197
8892	EIF2B2	0.494348	6.3597	25.4474	0.001762	0.0247198
84191	CIAO2A	-0.507738	5.28581	25.4093	0.00176916	0.0247574
84255	SLC37A3	0.537736	5.25752	25.3902	0.00177275	0.0247574
8349	H2BC21	0.782764	8.21386	25.3885	0.00177307	0.0247574
6648	SOD2	-0.552695	4.96825	25.388	0.00177316	0.0247574
10043	TOM1	0.694174	4.24633	25.3873	0.00177329	0.0247574
102724571	LNCTAM34A	1.82625	0.691451	25.3754	0.00177555	0.0247574
7866	IFRD2	-0.453351	5.87186	25.3746	0.00177568	0.0247574
3329	HSPD1	-0.475797	9.55353	25.3502	0.00178031	0.0248
23456	ABCB10	-0.62898	5.11065	25.3271	0.00178469	0.0248391
401541	CENPP	-1.06046	2.93768	25.3134	0.0017873	0.024846
84056	KATNAL1	-0.720145	4.4247	25.3079	0.00178834	0.024846
4643	MYO1E	0.701375	4.9042	25.2989	0.00179006	0.0248479
1200	TPP1	0.641657	6.01078	25.2729	0.00179504	0.0248951
647946	MIR924HG	-1.87093	1.17822	25.2455	0.00180029	0.0249237
10940	POP1	-0.729983	5.17253	25.2273	0.0018038	0.0249237
8581	LY6D	2.21172	0.0893283	25.2158	0.00180602	0.0249237
51029	DESI2	-0.464232	5.72412	25.2154	0.0018061	0.0249237
4927	NUP88	-0.587444	6.30368	25.2085	0.00180743	0.0249237
51444	RNF138	-0.765054	4.79438	25.2042	0.00180826	0.0249237
84908	FAM136A	-0.484236	6.84274	25.2039	0.00180832	0.0249237
100129482	ZNF37BP	-0.758662	4.60901	25.1874	0.00181152	0.0249237
8518	ELP1	-0.474531	6.7687	25.1841	0.00181215	0.0249237
127829	ARL8A	0.517589	6.00868	25.1802	0.00181292	0.0249237
3073	HEXA	0.44601	7.14728	25.1498	0.00181882	0.024983
3106	HLA-B	0.714562	4.48301	25.1164	0.00182535	0.0250509
1829	DSG2	-0.666556	6.99661	25.1051	0.00182758	0.0250596
666	BOK	0.472654	5.70711	25.0917	0.0018302	0.0250737
3065	HDAC1	-0.443807	7.0456	25.0621	0.00183603	0.0250917
338440	ANO9	0.609117	5.30995	25.0612	0.00183621	0.0250917
84929	FIBCD1	0.794001	3.74772	25.0469	0.00183904	0.0250917
5050	PAFAH1B3	-0.676091	5.12926	25.0458	0.00183925	0.0250917
51154	MRTO4	-0.472587	5.51357	25.0447	0.00183947	0.0250917
125050	RN7SK	2.05842	1.29984	25.0169	0.00184498	0.0251214
10915	TCERG1	-0.496743	6.6226	25.015	0.00184535	0.0251214
151	ADRA2B	-2.35274	0.733158	25.0096	0.00184643	0.0251214
57804	POLD4	0.649861	5.83583	24.9933	0.00184968	0.0251438
55344	PLCXD1	-0.880808	4.01272	24.9817	0.00185199	0.0251535
7410	VAV2	0.426676	7.3213	24.9609	0.00185614	0.0251882
6421	SFPQ	-0.659494	8.46835	24.9418	0.00185996	0.0252007
8061	FOSL1	2.00977	2.24147	24.9142	0.00186552	0.0252007
167227	DCP2	-0.482903	6.13663	24.9119	0.00186598	0.0252007
79006	METRN	0.565093	5.0478	24.9086	0.00186664	0.0252007
3613	IMPA2	-0.83494	3.98342	24.908	0.00186676	0.0252007
9107	MTMR6	0.559017	6.44527	24.9055	0.00186726	0.0252007
4691	NCL	-0.521905	10.0041	24.8851	0.0018714	0.0252007
2548	GAA	0.571296	7.65411	24.8817	0.00187208	0.0252007
23138	N4BP3	0.693488	6.7753	24.8707	0.00187431	0.0252007
4322	MMP13	2.22018	1.05332	24.869	0.00187466	0.0252007
7718	ZNF165	-0.989084	3.1024	24.8671	0.00187504	0.0252007
92610	TIFA	-1.07203	3.59135	24.8611	0.00187626	0.0252007
5827	PXMP2	-0.934268	4.39205	24.8516	0.0018782	0.0252053
3162	HMOX1	1.06548	3.08933	24.8338	0.00188181	0.0252322
84520	GON7	-0.710145	4.77019	24.7947	0.00188981	0.0252951
6398	SECTM1	1.44104	1.79599	24.7942	0.0018899	0.0252951
5511	PPP1R8	-0.498864	5.34276	24.7873	0.00189131	0.0252951
377841	ENTPD8	1.05183	3.3383	24.763	0.00189631	0.0253404
80155	NAA15	-0.448514	6.71948	24.7365	0.00190177	0.0253779
90007	MIDN	0.574	6.84275	24.7338	0.00190234	0.0253779
4241	MELTF	-1.03442	2.52304	24.7141	0.00190641	0.0254054
5425	POLD2	-0.455914	6.93687	24.7082	0.00190762	0.0254054
387680	WASHC2A	0.467168	5.6826	24.6743	0.00191468	0.0254778
55362	TMEM63B	0.5519	6.61439	24.6425	0.00192132	0.0255446
10381	TUBB3	0.782294	7.12639	24.6118	0.00192776	0.0256087
10419	PRMT5	-0.53037	7.48395	24.5959	0.00193111	0.0256315
23247	KATNIP	0.46445	5.7535	24.5814	0.00193418	0.0256507
83451	ABHD11	0.622796	6.69294	24.5527	0.00194025	0.0257096
219927	MRPL21	-0.547409	5.30926	24.5351	0.00194398	0.0257373
6461	SHB	0.672944	5.24287	24.5191	0.0019474	0.0257609
153572	IRX2	0.485906	5.46183	24.5087	0.0019496	0.0257685
60509	AGBL5	0.553585	5.1245	24.4752	0.00195678	0.0258251
80781	COL18A1	0.573325	7.52211	24.4725	0.00195735	0.0258251
7637	ZNF84	0.469961	6.09723	24.4657	0.0019588	0.0258251
219988	PATL1	-0.521073	5.96478	24.4538	0.00196136	0.0258371
7167	TPI1	-0.452522	9.30139	24.4143	0.00196989	0.0259218
128272	ARHGEF19	-0.729722	4.53024	24.4088	0.00197108	0.0259218
317762	CCDC85C	-0.433829	6.85529	24.3891	0.00197536	0.0259339
10801	SEPTIN9	0.999385	8.47762	24.3809	0.00197713	0.0259339
286148	DPY19L4	-0.437788	6.8996	24.38	0.00197732	0.0259339
92667	MGME1	-0.488627	5.79654	24.361	0.00198147	0.0259339
100506548	NA	0.745195	4.77621	24.3598	0.00198172	0.0259339
3909	LAMA3	0.921334	4.12867	24.3591	0.00198187	0.0259339
113026	PLCD3	0.737873	6.72863	24.337	0.00198671	0.0259602
5349	FXYD3	0.827055	7.7659	24.3348	0.00198718	0.0259602
402778	IFITM10	1.21424	5.27845	24.3232	0.00198972	0.0259634
84295	PHF6	-0.438195	6.26808	24.3186	0.00199072	0.0259634
91419	ATP23	-0.803507	3.45748	24.2762	0.00200006	0.0260636
26469	PTPN18	-0.566122	6.75775	24.2625	0.00200307	0.0260813
25829	TMEM184B	0.461837	6.36652	24.241	0.00200783	0.0261084
1287	COL4A5	0.605414	5.85762	24.2382	0.00200846	0.0261084
84126	ATRIP	-0.782208	4.10283	24.223	0.00201183	0.0261296
56910	STARD7	-0.458183	8.10685	24.2079	0.00201519	0.0261296
10577	NPC2	0.461327	6.58482	24.2076	0.00201527	0.0261296
347240	KIF24	-1.50813	3.31411	24.201	0.00201673	0.0261296
1123	CHN1	-0.751771	4.30845	24.1834	0.00202066	0.0261389
102723465	NA	1.41509	2.44885	24.1712	0.0020234	0.0261389
10272	FSTL3	0.76226	5.41138	24.17	0.00202366	0.0261389
23076	RRP1B	-0.423576	6.47428	24.1679	0.00202415	0.0261389
79144	PPDPF	0.530355	7.95518	24.1607	0.00202574	0.0261389
6692	SPINT1	0.431239	7.61264	24.133	0.00203198	0.0261979
1041	CDSN	1.96761	3.49991	24.0972	0.00204005	0.0262805
117178	SSX2IP	-0.551724	5.53	24.087	0.00204237	0.0262888
79001	VKORC1	-0.659609	5.87505	24.0795	0.00204406	0.0262891
9823	ARMCX2	0.673714	4.36681	24.0413	0.00205277	0.0263703
80183	RUBCNL	2.08165	0.802621	24.0365	0.00205387	0.0263703
5522	PPP2R2C	0.503852	6.33154	24.0254	0.00205639	0.0263703
4294	MAP3K10	0.866343	3.35281	24.019	0.00205786	0.0263703
7161	TP73	-1.16788	3.28635	24.0147	0.00205885	0.0263703
10717	AP4B1	-0.536282	5.91937	24.0079	0.00206041	0.0263703
4000	LMNA	0.42046	7.84754	23.9931	0.0020638	0.0263848
9605	VPS9D1	0.639262	4.87216	23.9845	0.00206578	0.0263848
3728	JUP	0.658439	9.52688	23.9811	0.00206657	0.0263848
51454	GULP1	1.01421	5.72328	23.9508	0.00207356	0.0264526
8857	FCGBP	1.55432	1.22123	23.9149	0.00208189	0.0265374
65018	PINK1	0.972169	5.64993	23.8712	0.00209207	0.026635
744	MPPED2	-1.4632	1.82408	23.863	0.002094	0.026635
131034	CPNE4	0.746977	4.17489	23.8603	0.00209462	0.026635
23514	SPIDR	-0.451308	5.73596	23.8327	0.00210111	0.026696
90990	KIFC2	0.780201	6.807	23.816	0.00210505	0.0267041
51760	SYT17	0.78361	3.54449	23.8156	0.00210514	0.0267041
55329	MNS1	-2.29008	0.684987	23.8027	0.00210817	0.026721
708	C1QBP	-0.488373	7.69276	23.7547	0.00211956	0.0268289
80071	CCDC15	-1.66105	2.05004	23.7525	0.00212008	0.0268289
23333	DPY19L1	-0.435443	5.90658	23.7376	0.00212365	0.0268524
153222	CREBRF	0.670379	4.19204	23.7132	0.00212947	0.0269044
388407	LINC02875	1.12619	2.19906	23.7028	0.00213195	0.0269142
84058	WDR54	-0.537189	5.03967	23.6886	0.00213537	0.0269357
2805	GOT1	-0.520678	5.53874	23.6792	0.00213763	0.0269427
26577	PCOLCE2	-2.03126	0.492635	23.6547	0.00214353	0.0269502
200894	ARL13B	-0.649916	4.38148	23.6507	0.0021445	0.0269502
8533	COPS3	-0.45512	6.3687	23.65	0.00214468	0.0269502
57198	ATP8B2	0.679834	6.96328	23.6483	0.00214507	0.0269502
162073	ITPRIPL2	0.66627	4.51702	23.6285	0.00214987	0.0269703
4982	TNFRSF11B	1.08648	2.71771	23.6276	0.00215009	0.0269703
3091	HIF1A	0.517504	8.56449	23.6193	0.0021521	0.0269741
23646	PLD3	0.460109	6.35143	23.5928	0.00215856	0.0270286
100128361	NA	-1.64169	1.35427	23.585	0.00216044	0.0270286
11013	TMSB15A	-3.25356	-0.772812	23.5803	0.0021616	0.0270286
805	CALM2	-0.443199	9.17587	23.5595	0.00216668	0.0270706
117145	THEM4	-1.10451	3.935	23.5416	0.00217106	0.0271039
215	ABCD1	0.662165	4.87663	23.5316	0.00217354	0.0271133
284098	PIGW	-0.650174	4.45298	23.516	0.00217738	0.0271397
6546	SLC8A1	0.592086	4.69188	23.4979	0.00218183	0.0271737
6596	HLTF	-0.459763	6.91752	23.4789	0.00218655	0.027211
79669	C3orf52	1.1358	2.60918	23.4585	0.00219161	0.0272525
121274	ZNF641	0.619488	5.49808	23.4445	0.00219509	0.0272625
80853	KDM7A	0.736776	4.81816	23.4413	0.00219588	0.0272625
5499	PPP1CA	-0.400926	8.1781	23.4303	0.00219863	0.0272744
29993	PACSIN1	-0.767694	3.92189	23.4197	0.00220128	0.0272744
51646	YPEL5	0.647747	6.69249	23.4167	0.00220203	0.0272744
348327	ZNF530	-1.27424	2.19486	23.3908	0.00220852	0.0273332
114034	TOE1	-0.742519	3.6607	23.3814	0.00221087	0.0273408
3300	DNAJB2	0.521857	5.44079	23.365	0.002215	0.0273705
753	LDLRAD4	0.679148	4.70713	23.3445	0.00222019	0.0274131
131544	CRYBG3	-0.987103	4.09617	23.3291	0.00222409	0.0274139
55796	MBNL3	-0.639107	5.95866	23.3264	0.00222478	0.0274139
10556	RPP30	-0.591981	4.57067	23.3184	0.00222679	0.0274139
55625	ZDHHC7	0.76537	8.13936	23.3167	0.00222722	0.0274139
64787	EPS8L2	0.556561	7.13261	23.3045	0.00223033	0.0274308
79979	TRMT2B	-0.47177	6.12284	23.2966	0.00223232	0.0274339
9620	CELSR1	0.568367	7.30481	23.265	0.00224039	0.0275116
399818	EEF1AKMT2	-0.726514	3.84246	23.2005	0.00225698	0.0276937
339105	PRSS53	-1.17812	2.49986	23.1747	0.00226366	0.0277339
7126	TNFAIP1	0.497414	6.33564	23.1742	0.00226378	0.0277339
537	ATP6AP1	0.412167	8.42888	23.1392	0.00227288	0.0278238
1665	DHX15	-0.518078	7.99046	23.1229	0.00227714	0.0278318
79694	MANEA	-0.609811	4.45669	23.1155	0.00227908	0.0278318
4698	NDUFA5	-0.464445	6.43757	23.1133	0.00227964	0.0278318
257415	FAM133B	-0.679501	4.40608	23.1059	0.00228159	0.0278318
4286	MITF	2.15337	3.5051	23.1024	0.0022825	0.0278318
79443	FYCO1	0.48222	5.5693	23.0864	0.00228669	0.0278318
55300	PI4K2B	-0.492016	5.9594	23.0824	0.00228776	0.0278318
143686	SESN3	0.774605	4.55245	23.0807	0.0022882	0.0278318
8503	PIK3R3	0.535274	7.57259	23.076	0.00228944	0.0278318
26277	TINF2	0.438047	6.15206	23.0638	0.00229264	0.0278493
51291	GMIP	0.543464	4.95334	23.0321	0.00230102	0.0279295
23137	SMC5	-0.524861	5.58564	22.9274	0.00232898	0.0282472
10777	ARPP21	1.74294	0.771341	22.913	0.00233286	0.0282725
55062	WIPI1	0.67471	5.13996	22.8639	0.00234616	0.0284118
9879	DDX46	-0.641807	7.47795	22.847	0.00235073	0.0284453
22874	PLEKHA6	0.462504	6.64895	22.8325	0.0023547	0.0284546
1690	COCH	-1.09292	3.18042	22.8294	0.00235554	0.0284546
6281	S100A10	0.769411	8.68268	22.8244	0.00235692	0.0284546
51092	SIDT2	0.534713	5.19319	22.7983	0.00236406	0.0285189
79847	MFSD13A	-1.39322	1.91091	22.7869	0.00236719	0.0285348
9774	BCLAF1	-0.428588	8.03044	22.7527	0.0023766	0.0286265
1515	CTSV	-0.83087	3.7609	22.7218	0.00238518	0.0286979
10054	UBA2	-0.400087	7.2942	22.7182	0.00238618	0.0286979
6631	SNRPC	-0.41772	6.29139	22.6806	0.00239665	0.0288018
7419	VDAC3	-0.492789	6.49129	22.6537	0.00240418	0.0288102
8365	H4C8	1.67684	4.14229	22.6524	0.00240453	0.0288102
1201	CLN3	0.431522	6.80261	22.6455	0.00240648	0.0288102
9978	RBX1	-0.519999	5.04551	22.6433	0.00240708	0.0288102
92714	ARRDC1	0.545772	6.93591	22.6304	0.00241071	0.0288102
676	BRDT	-4.10373	-0.818783	22.6253	0.00241215	0.0288102
51496	CTDSPL2	-0.675023	5.27302	22.6233	0.00241272	0.0288102
1130	LYST	0.665684	4.1023	22.6195	0.0024138	0.0288102
51309	ARMCX1	0.789075	4.99968	22.6194	0.00241381	0.0288102
286223	NA	1.37274	1.44199	22.6091	0.00241672	0.0288232
64863	METTL4	-0.687044	3.87682	22.5924	0.00242144	0.0288462
80228	ORAI2	0.591171	5.93693	22.5894	0.00242231	0.0288462
5986	RFNG	0.782047	4.45606	22.5414	0.00243595	0.0289786
2668	GDNF	1.735	0.89059	22.5336	0.00243816	0.0289786
4851	NOTCH1	0.702001	5.3395	22.5246	0.00244073	0.0289786
7078	TIMP3	1.39052	8.26437	22.5244	0.00244079	0.0289786
57560	IFT80	-0.492379	5.21179	22.5069	0.0024458	0.0290072
1774	DNASE1L1	0.513269	5.8906	22.5032	0.00244688	0.0290072
116840	CNTROB	-0.462156	5.4705	22.4606	0.00245912	0.0291305
8635	RNASET2	0.576493	5.69164	22.4519	0.00246165	0.0291384
64116	SLC39A8	-0.831556	6.09909	22.4295	0.00246815	0.0291696
169200	TMEM64	0.958553	9.60122	22.4278	0.00246862	0.0291696
55274	PHF10	-0.4393	5.8918	22.4237	0.00246984	0.0291696
34	ACADM	-0.563607	4.99784	22.339	0.00249459	0.0294238
119392	SFR1	-1.15887	2.37359	22.3373	0.00249509	0.0294238
9894	TELO2	-0.476435	5.69805	22.3305	0.0024971	0.0294254
468	ATF4	0.406785	7.90429	22.3236	0.00249914	0.0294275
84243	ZDHHC18	-0.488373	5.20769	22.3121	0.00250254	0.0294371
54439	RBM27	-0.44748	6.59919	22.3081	0.00250369	0.0294371
124997	WDR81	0.506924	5.07847	22.2898	0.00250913	0.029479
64421	DCLRE1C	-0.710815	4.56695	22.2776	0.00251276	0.0294996
6520	SLC3A2	0.773868	8.0345	22.2184	0.00253043	0.0296657
26528	DAZAP1	-0.465759	6.63313	22.2143	0.00253165	0.0296657
54682	MANSC1	-0.526861	5.07304	22.207	0.00253385	0.0296657
11152	WDR45	0.546137	4.92563	22.205	0.00253443	0.0296657
4125	MAN2B1	0.615505	6.11824	22.1577	0.00254869	0.0297916
6804	STX1A	0.699854	3.88645	22.1568	0.00254897	0.0297916
5223	PGAM1	-0.423698	5.91665	22.1337	0.00255597	0.0298149
6311	ATXN2	0.42678	6.0172	22.1295	0.00255726	0.0298149
116151	FAM210B	0.518399	6.62781	22.1254	0.00255849	0.0298149
340252	ZNF680	-0.656228	4.7109	22.1253	0.00255854	0.0298149
22984	PDCD11	-0.469524	6.22474	22.1013	0.00256585	0.029878
90557	CCDC74A	-0.681847	4.22824	22.0857	0.00257062	0.0299114
9786	KIAA0586	-0.593384	4.94293	22.0592	0.00257873	0.0299837
115294	PCMTD1	0.602827	5.06267	22.0153	0.00259229	0.0301191
91750	LIN52	-0.841783	3.63515	22.0069	0.00259487	0.0301268
7170	TPM3	-0.414466	8.82832	21.9737	0.0026052	0.0302246
5002	SLC22A18	0.791056	4.16119	21.87	0.00263776	0.0305798
140685	ZBTB46	0.68985	4.47084	21.857	0.00264186	0.0306005
4053	LTBP2	0.893648	3.32692	21.8521	0.00264343	0.0306005
222962	SLC29A4	0.980147	3.72876	21.8092	0.0026571	0.0307153
3984	LIMK1	0.543361	5.7095	21.8087	0.00265725	0.0307153
80777	CYB5B	-0.576863	7.23597	21.766	0.00267094	0.0308318
8831	SYNGAP1	-0.496875	5.5624	21.7543	0.00267471	0.0308318
2101	ESRRA	0.501351	5.27597	21.7537	0.00267491	0.0308318
2889	RAPGEF1	0.427088	7.07818	21.7529	0.00267516	0.0308318
1837	DTNA	0.599112	7.23216	21.7467	0.00267717	0.0308325
3682	ITGAE	-0.828848	3.79279	21.7383	0.00267989	0.0308328
128869	PIGU	-0.592051	4.79396	21.7345	0.00268111	0.0308328
4329	ALDH6A1	-0.571319	5.99061	21.7173	0.00268666	0.0308741
23184	MESD	-0.552868	6.50115	21.7054	0.00269052	0.0308959
204	AK2	-0.427573	6.26535	21.6871	0.00269649	0.0309093
1952	CELSR2	0.56528	8.62038	21.6852	0.00269711	0.0309093
115004	CGAS	-0.975644	2.84904	21.6837	0.00269758	0.0309093
84961	FBXL20	0.717108	3.93762	21.6291	0.00271545	0.0310915
11045	UPK1A	-1.49134	1.78593	21.6152	0.00272005	0.0311215
10155	TRIM28	-0.447673	8.85113	21.5866	0.00272949	0.0311731
9816	URB2	-0.547651	4.81324	21.5813	0.00273123	0.0311731
114787	GPRIN1	-0.52136	4.97922	21.5793	0.00273191	0.0311731
123169	LEO1	-0.399704	6.80491	21.5759	0.00273303	0.0311731
8630	HSD17B6	-1.7489	0.474057	21.5716	0.00273445	0.0311731
378708	CENPS	-2.12888	0.565005	21.5412	0.00274457	0.0312469
2957	GTF2A1	-0.607892	6.52231	21.5402	0.00274489	0.0312469
373156	GSTK1	0.419982	6.18839	21.514	0.00275365	0.031324
102724515	NA	0.908458	3.35847	21.452	0.00277449	0.0315383
25999	CLIP3	1.11946	2.14019	21.4355	0.00278009	0.0315792
4739	NEDD9	1.02115	5.52592	21.4228	0.00278439	0.0316052
6548	SLC9A1	0.465913	6.77333	21.3944	0.00279406	0.0316922
79070	POGLUT2	-1.1019	2.9976	21.3613	0.00280541	0.031784
617	BCS1L	-0.633834	4.83151	21.357	0.00280686	0.031784
55558	PLXNA3	0.751658	7.30043	21.3531	0.00280821	0.031784
10891	PPARGC1A	2.89212	-0.682023	21.3006	0.00282631	0.0319401
54978	SLC35F6	0.977052	6.54926	21.2967	0.00282765	0.0319401
6636	SNRPF	-0.433525	6.07655	21.2955	0.00282808	0.0319401
25974	MMACHC	-0.863204	3.15492	21.2443	0.00284589	0.032111
25840	METTL7A	-1.99383	3.4825	21.2403	0.00284729	0.032111
126298	IRGQ	0.54333	5.28105	21.2177	0.00285524	0.0321776
1738	DLD	-0.413366	7.88647	21.1897	0.00286507	0.0322653
84547	PGBD1	-1.18013	2.13054	21.1812	0.00286806	0.032276
83448	PUS7L	-0.561422	4.56654	21.1696	0.00287217	0.0322991
79921	TCEAL4	0.404376	7.97524	21.1528	0.00287811	0.0323428
112476	PRRT2	-0.826676	4.03419	21.1361	0.00288406	0.0323618
54480	CHPF2	0.481726	5.91655	21.1318	0.00288558	0.0323618
79830	ZMYM1	-0.638342	4.03955	21.1307	0.00288596	0.0323618
79077	DCTPP1	-0.479824	6.78216	21.1194	0.00289001	0.0323842
54842	MFSD6	0.452369	5.65213	21.0684	0.00290824	0.0325225
3628	INPP1	1.62254	1.58207	21.0679	0.00290842	0.0325225
101559451	PELP1-DT	-2.18511	-0.158617	21.0676	0.00290855	0.0325225
3669	ISG20	1.16737	2.26129	21.0607	0.00291102	0.0325271
506	ATP5F1B	-0.38813	9.60682	21.0499	0.00291493	0.0325476
54930	HAUS4	-0.658584	5.9738	21.0378	0.00291929	0.032553
1917	EEF1A2	0.631211	10.3006	21.0371	0.00291954	0.032553
283643	TEDC1	-0.695447	4.86412	21.031	0.00292176	0.0325547
100996702	LINC01356	6.43767	-0.911397	25.093	0.00293905	0.0327242
5126	PCSK2	0.947512	6.29476	20.9767	0.00294148	0.0327281
84279	PRADC1	-0.845736	3.8407	20.9579	0.00294834	0.0327813
11001	SLC27A2	-0.837293	3.92675	20.9387	0.00295539	0.0328365
8833	GMPS	-0.474451	7.30145	20.9166	0.00296349	0.0328521
2043	EPHA4	0.8866	6.87476	20.9166	0.00296351	0.0328521
10489	LRRC41	0.415981	6.06827	20.9146	0.00296423	0.0328521
728554	NA	-0.606579	4.60205	20.9122	0.00296514	0.0328521
10207	PATJ	0.581071	6.80833	20.905	0.0029678	0.0328585
1808	DPYSL2	-0.724232	5.24981	20.8824	0.00297614	0.0329277
91862	MARVELD3	0.488837	5.47824	20.8603	0.00298433	0.0329514
10360	NPM3	-0.594654	4.56374	20.8548	0.00298641	0.0329514
169714	QSOX2	-0.481451	5.11894	20.8508	0.00298787	0.0329514
83743	GRWD1	-0.525507	5.58464	20.8464	0.00298951	0.0329514
221002	RASGEF1A	1.4527	1.15105	20.8456	0.0029898	0.0329514
54993	ZSCAN2	0.756166	3.56898	20.8429	0.00299083	0.0329514
162655	ZNF519	-1.29061	2.54554	20.8222	0.00299855	0.0330134
5979	RET	0.793218	7.2242	20.8162	0.00300081	0.0330152
5099	PCDH7	-0.469823	5.4502	20.8011	0.00300646	0.033035
84665	MYPN	1.70516	0.606653	20.8002	0.0030068	0.033035
5438	POLR2I	-0.638729	4.36137	20.7916	0.00301003	0.0330407
84171	LOXL4	1.91996	0.339946	20.7863	0.00301203	0.0330407
5098	PCDHGC3	-0.77802	4.40987	20.7821	0.00301361	0.0330407
89846	FGD3	1.0559	4.82484	20.7488	0.00302617	0.0331553
9821	RB1CC1	0.391374	6.45996	20.7335	0.00303198	0.0331656
22931	RAB18	0.447936	7.60835	20.7274	0.00303432	0.0331656
84924	ZNF566	-0.720314	3.61232	20.722	0.00303634	0.0331656
10426	TUBGCP3	-0.684706	4.91924	20.7214	0.0030366	0.0331656
6950	TCP1	-0.394653	7.56717	20.7186	0.00303764	0.0331656
124359	CDYL2	0.726816	5.06698	20.6955	0.00304646	0.0332099
6881	TAF10	0.534596	4.69755	20.6883	0.00304922	0.0332099
3017	H2BC5	0.405706	6.1019	20.6865	0.00304989	0.0332099
57685	CACHD1	-0.955133	2.75557	20.6859	0.00305013	0.0332099
10133	OPTN	0.860656	5.68038	20.6553	0.00306185	0.033302
79640	C22orf46	-0.733521	4.37167	20.6487	0.0030644	0.033302
54780	NSMCE4A	-0.591411	4.86249	20.6473	0.00306493	0.033302
23145	NA	0.611218	4.36537	20.6359	0.00306933	0.0333269
23052	ENDOD1	-0.539749	4.86853	20.5801	0.00309095	0.0335385
51134	CEP83	-0.658779	4.04774	20.5708	0.00309456	0.0335443
23505	TMEM131	0.385018	7.12213	20.5678	0.00309575	0.0335443
220001	VWCE	1.9081	0.231264	20.5568	0.00310002	0.0335465
54762	GRAMD1C	-1.37499	1.16795	20.5564	0.00310021	0.0335465
120103	SLC36A4	-1.024	2.47233	20.5129	0.00311726	0.0337079
2786	GNG4	-1.43287	1.80207	20.4836	0.00312881	0.0338096
57624	NYAP2	3.75245	-0.48353	20.4712	0.00313371	0.0338329
27000	DNAJC2	-0.459497	6.44662	20.4673	0.00313526	0.0338329
197259	MLKL	-1.07871	1.97967	20.4607	0.00313787	0.0338379
26519	TIMM10	-0.554224	4.55098	20.4451	0.00314409	0.0338649
3394	IRF8	2.31546	0.724799	20.4331	0.00314885	0.0338649
9766	SUSD6	0.484514	5.97477	20.4331	0.00314887	0.0338649
1974	EIF4A2	0.667272	8.20829	20.4318	0.0031494	0.0338649
100507217	NA	-0.426554	5.75842	20.4274	0.00315113	0.0338649
153241	CEP120	-0.573033	5.06072	20.3832	0.00316885	0.0340322
8925	HERC1	0.444433	6.46879	20.3586	0.00317876	0.0341154
8916	HERC3	0.419586	6.1419	20.3515	0.00318163	0.0341229
84260	TCHP	-0.546114	4.71714	20.334	0.0031887	0.0341751
8339	H2BC8	1.37664	4.39284	20.3263	0.00319182	0.0341751
4131	MAP1B	1.19881	4.16733	20.3234	0.003193	0.0341751
399827	LINC01164	2.42251	-0.245613	20.3165	0.0031958	0.0341818
10529	NEBL	0.50057	7.60742	20.3082	0.00319922	0.0341951
51160	VPS28	0.414461	6.10914	20.287	0.00320785	0.0342512
155370	SBDSP1	-0.536872	5.67018	20.2799	0.00321073	0.0342512
55102	ATG2B	0.435487	6.90522	20.276	0.00321233	0.0342512
421	ARVCF	0.830445	4.78654	20.274	0.00321315	0.0342512
55450	CAMK2N1	0.445667	6.56513	20.2344	0.00322945	0.0344016
85459	CEP295	-0.682864	4.94338	20.2229	0.00323419	0.0344261
92675	DTD1	-0.410905	5.72707	20.2182	0.00323612	0.0344261
79170	PRR15L	0.463221	6.00916	20.2094	0.00323976	0.0344416
51193	ZNF639	-0.441874	5.42224	20.1927	0.0032467	0.034492
6542	SLC7A2	0.550437	9.70062	20.1597	0.0032604	0.0346143
4616	GADD45B	0.428194	5.726	20.1018	0.00328471	0.0348489
5890	RAD51B	-0.866545	3.371	20.0942	0.00328789	0.0348504
3006	H1-2	0.960864	5.95169	20.0909	0.00328928	0.0348504
29995	LMCD1	1.45551	4.55597	20.0816	0.00329321	0.0348686
415116	PIM3	0.447651	6.06889	20.0576	0.00330337	0.0349381
54492	NEURL1B	-0.61516	5.51975	20.0557	0.00330421	0.0349381
9710	GARRE1	0.590306	4.43924	20.0397	0.00331101	0.0349866
84162	KIAA1109	0.517013	6.92964	19.9989	0.00332844	0.0351472
29896	TRA2A	-0.473093	6.50973	19.9669	0.00334219	0.0352302
6016	RIT1	0.48183	5.71038	19.9656	0.00334275	0.0352302
95681	CEP41	-0.599888	4.36773	19.965	0.00334301	0.0352302
8815	BANF1	-0.423816	6.74535	19.9458	0.00335129	0.0352738
26994	RNF11	0.457677	7.16021	19.945	0.00335162	0.0352738
51490	SPOUT1	-0.391107	6.13096	19.9268	0.00335952	0.0353268
57482	CRACD	0.802522	3.31316	19.9231	0.00336115	0.0353268
1468	SLC25A10	-0.42577	6.01388	19.9049	0.00336906	0.0353864
55699	IARS2	-0.375354	7.78774	19.886	0.00337729	0.0354492
22848	AAK1	0.426754	5.61014	19.8722	0.00338334	0.0354891
7803	PTP4A1	0.723306	8.8474	19.8473	0.00339426	0.0355799
5339	PLEC	0.610231	8.52463	19.8219	0.00340546	0.0356526
2530	FUT8	0.495475	7.57735	19.8213	0.00340573	0.0356526
55003	PAK1IP1	-0.513306	4.87104	19.8024	0.00341406	0.0357162
8871	SYNJ2	0.471952	5.98152	19.7952	0.00341726	0.0357259
140683	BPIFA2	-5.90367	-1.24891	23.5036	0.00342687	0.0358026
11160	ERLIN2	0.429948	6.38061	19.7487	0.00343798	0.0358949
2521	FUS	-0.633703	8.6846	19.7338	0.00344467	0.0359346
342892	ZNF850	-0.927926	2.482	19.73	0.00344634	0.0359346
23355	VPS8	0.477731	6.03165	19.7166	0.00345237	0.0359736
55775	TDP1	-0.507789	5.66058	19.6859	0.00346624	0.0360738
100506343	NA	1.87492	0.208592	19.6769	0.00347031	0.0360738
199953	TMEM201	-0.660717	3.8844	19.6751	0.00347109	0.0360738
6535	SLC6A8	0.62906	5.79348	19.675	0.00347114	0.0360738
56917	MEIS3	0.75718	4.30965	19.6573	0.0034792	0.0361337
3993	LLGL2	0.490126	8.77335	19.6356	0.00348908	0.0362124
201163	FLCN	0.72541	5.31708	19.6299	0.00349165	0.0362152
3931	LCAT	1.59075	0.904525	19.6119	0.00349988	0.0362767
51806	CALML5	1.07343	3.36973	19.5921	0.00350897	0.0363364
115106	HAUS1	-0.742491	4.47774	19.5861	0.00351172	0.0363364
6775	STAT4	1.55023	1.38243	19.5842	0.0035126	0.0363364
30827	CXXC1	-0.543967	4.94828	19.5793	0.00351486	0.0363364
94081	SFXN1	-0.398965	7.59859	19.5686	0.00351977	0.0363579
996	CDC27	-0.38308	6.82151	19.5647	0.00352156	0.0363579
201254	CENPX	-0.403984	5.97666	19.5524	0.00352727	0.0363863
293	SLC25A6	0.392036	8.58827	19.5477	0.00352943	0.0363863
9688	NUP93	-0.412828	5.55998	19.5438	0.00353124	0.0363863
54843	SYTL2	0.403144	9.69271	19.5315	0.00353695	0.0364213
8933	RTL8C	0.423362	6.3935	19.512	0.00354603	0.0364909
255394	TCP11L2	0.827732	3.11284	19.4863	0.003558	0.0365902
27336	HTATSF1	-0.376304	7.38733	19.4714	0.00356496	0.0366379
79675	FASTKD1	-0.693164	3.91364	19.4523	0.00357396	0.0367065
3174	HNF4G	2.73536	-0.483983	19.4432	0.00357822	0.0367263
256364	EML3	-0.417364	5.53972	19.4344	0.00358239	0.0367425
79763	ISOC2	-0.568085	4.97954	19.43	0.00358446	0.0367425
693199	MIR614	1.08907	2.26099	19.4113	0.00359329	0.036809
27076	LYPD3	0.537557	6.14187	19.406	0.00359582	0.036811
79441	HAUS3	-0.509472	4.80012	19.3989	0.00359919	0.0368216
220082	CBY2	1.85819	0.297533	19.3597	0.00361789	0.0369759
59277	NTN4	1.62575	5.95792	19.3574	0.00361896	0.0369759
23324	MAN2B2	0.442419	5.43541	19.3442	0.00362529	0.0369974
6627	SNRPA1	-0.684284	6.08163	19.3432	0.00362577	0.0369974
84920	ALG10	-0.6114	4.14773	19.312	0.00364075	0.0371051
5873	RAB27A	-0.727853	3.4436	19.3114	0.00364103	0.0371051
202333	CMYA5	0.790674	4.91247	19.3054	0.00364396	0.0371109
10742	RAI2	0.873774	2.72097	19.2912	0.0036508	0.0371254
102723814	NA	1.13737	1.99456	19.29	0.00365138	0.0371254
54910	SEMA4C	0.483365	8.18316	19.2878	0.00365245	0.0371254
654254	ZNF732	-1.45152	0.765102	19.2679	0.0036621	0.0371995
64847	SPATA20	0.675506	6.92447	19.2494	0.00367111	0.0372534
4900	NRGN	-1.63032	1.30198	19.2472	0.00367214	0.0372534
11069	RAPGEF4	-1.31316	1.36462	19.238	0.00367663	0.0372749
51728	POLR3K	-0.67253	5.3692	19.2274	0.00368185	0.0373039
1606	DGKA	1.00465	4.99932	19.2091	0.00369078	0.037366
84955	NUDCD1	-0.436674	6.40294	19.1974	0.00369653	0.037366
64943	NT5DC2	-0.606082	6.16755	19.1966	0.00369691	0.037366
285958	SNHG15	-0.632172	4.06497	19.1955	0.00369747	0.037366
3133	HLA-E	0.447073	7.08859	19.1883	0.00370103	0.037378
22891	ZNF365	1.44662	1.82599	19.1659	0.00371207	0.0374656
58493	INIP	-0.421665	5.65651	19.1341	0.00372781	0.0376003
5378	PMS1	-0.757132	4.73276	19.1293	0.00373023	0.0376006
3915	LAMC1	0.609451	7.66855	19.1107	0.0037395	0.0376699
148156	ZNF558	0.672102	3.76466	19.1026	0.00374355	0.0376866
728715	NA	-2.19247	0.882383	19.0874	0.00375114	0.0377283
2583	B4GALNT1	-0.670668	4.92907	19.0847	0.00375247	0.0377283
115811	IQCD	1.1688	2.34751	19.0673	0.00376123	0.0377922
55033	FKBP14	-0.734727	3.31704	19.0398	0.0037751	0.0379074
7425	VGF	0.795787	3.7053	19.0219	0.00378416	0.0379738
1781	DYNC1I2	0.426034	6.91844	19.0064	0.003792	0.0379738
54578	UGT1A6	1.69425	2.36466	19.0051	0.00379267	0.0379738
7248	TSC1	0.473799	6.00983	19.0033	0.0037936	0.0379738
10811	NOXA1	0.666347	4.37815	19.003	0.00379377	0.0379738
7832	BTG2	1.0809	6.54221	18.9672	0.00381202	0.0381323
10457	GPNMB	1.74177	4.96566	18.9402	0.00382587	0.0382404
5929	RBBP5	-0.40959	6.2818	18.9367	0.00382768	0.0382404
23173	METAP1	-0.369127	6.77351	18.9084	0.00384223	0.0383614
389524	GTF2IRD2B	1.02582	2.11535	18.9012	0.00384597	0.0383744
165055	CCDC138	-1.44598	2.96917	18.8753	0.00385942	0.0384843
116441	TM4SF18	3.12203	-0.521258	18.8555	0.00386972	0.0385626
196394	AMN1	0.870553	3.06335	18.8314	0.00388232	0.0386397
9848	MFAP3L	0.661261	4.23333	18.8313	0.00388236	0.0386397
84224	NBPF3	-0.602589	4.05112	18.7548	0.00392276	0.0390171
80263	TRIM45	-0.543964	4.50172	18.7397	0.00393076	0.039072
54529	ASNSD1	-0.429981	5.95426	18.7321	0.00393482	0.0390877
84950	PRPF38A	-0.429003	5.42362	18.713	0.00394503	0.0391582
257000	TINCR	0.825152	6.40197	18.7095	0.00394689	0.0391582
79670	TUT7	0.416264	5.96169	18.692	0.00395628	0.0392054
51218	GLRX5	-0.380163	6.67072	18.6913	0.00395669	0.0392054
91860	CALML4	-0.808888	2.9487	18.6868	0.00395912	0.0392054
5110	PCMT1	-0.392261	6.95228	18.6782	0.00396374	0.0392266
83658	DYNLRB1	0.39219	6.4553	18.6586	0.00397429	0.0393063
26993	AKAP8L	0.420412	6.1583	18.6094	0.00400098	0.0395454
6059	ABCE1	-0.389764	7.1787	18.5984	0.00400698	0.0395799
23587	ELP5	-0.584724	4.51117	18.5888	0.00401225	0.0395876
3385	ICAM3	-0.859405	2.64662	18.5878	0.00401278	0.0395876
25981	DNAH1	1.00576	2.35214	18.5777	0.00401831	0.0396173
5501	PPP1CC	-0.424305	7.70554	18.5672	0.00402407	0.0396493
57526	PCDH19	1.29229	3.912	18.5495	0.0040338	0.0396706
5683	PSMA2	-0.409275	7.15914	18.5441	0.00403677	0.0396706
55832	CAND1	-0.36397	8.50224	18.5436	0.00403707	0.0396706
10313	RTN3	-0.424675	7.92439	18.54	0.00403908	0.0396706
1138	CHRNA5	-1.22819	4.69452	18.5385	0.00403986	0.0396706
10908	PNPLA6	0.444131	5.28565	18.5359	0.00404134	0.0396706
4953	ODC1	-0.463451	6.46284	18.5286	0.00404536	0.0396788
79755	ZNF750	1.48045	2.02871	18.5252	0.00404721	0.0396788
55200	PLEKHG6	0.53375	4.59801	18.5183	0.00405108	0.039692
27242	TNFRSF21	0.911713	5.92915	18.4974	0.00406266	0.0397807
90141	EFCAB11	-0.686756	3.97835	18.4901	0.00406673	0.0397959
22990	PCNX1	0.464116	7.10085	18.4813	0.00407164	0.0398047
81607	NECTIN4	0.535353	5.50508	18.475	0.00407516	0.0398047
323	APBB2	0.534323	6.99186	18.4735	0.00407601	0.0398047
51660	MPC1	-0.691286	3.74933	18.4703	0.00407774	0.0398047
182	JAG1	1.55504	4.61843	18.4618	0.00408249	0.0398264
283403	NA	2.71761	-0.245254	18.4243	0.00410359	0.0400002
92105	INTS4	-0.529271	4.59191	18.4211	0.00410539	0.0400002
283624	LINC00641	-0.748741	3.8562	18.4127	0.0041101	0.0400214
55614	KIF16B	-0.485947	4.85503	18.3988	0.00411795	0.0400654
28998	MRPL13	-0.495138	5.39865	18.3957	0.0041197	0.0400654
292	SLC25A5	-0.369535	9.40776	18.3908	0.00412254	0.0400682
9266	CYTH2	0.388565	6.66026	18.3855	0.00412552	0.0400725
8604	SLC25A12	-0.696772	3.52601	18.3792	0.0041291	0.0400825
171023	ASXL1	-0.374139	6.2553	18.3734	0.00413237	0.0400896
150776	SMPD4BP	-0.492256	5.13639	18.3587	0.00414076	0.0401463
51691	LSM8	-0.422289	5.35968	18.3531	0.00414395	0.0401525
5690	PSMB2	-0.393418	6.4413	18.3415	0.00415055	0.0401574
2887	GRB10	0.586522	4.23444	18.3399	0.00415149	0.0401574
2627	GATA6	0.778852	3.31299	18.3358	0.00415383	0.0401574
57593	EBF4	1.08774	1.85469	18.3324	0.00415577	0.0401574
54793	KCTD9	-0.483933	5.8777	18.3299	0.0041572	0.0401574
101928485	NA	-0.950061	2.56454	18.3238	0.00416073	0.0401668
23171	GPD1L	0.545458	7.4043	18.3048	0.00417162	0.0402473
22901	ARSG	0.644547	4.66067	18.2947	0.00417744	0.0402608
6988	TCTA	0.542777	4.83311	18.2935	0.00417813	0.0402608
283638	CEP170B	0.361338	7.28766	18.2846	0.00418328	0.0402808
2002	ELK1	-0.42968	5.52225	18.2811	0.00418531	0.0402808
220988	HNRNPA3	-0.389984	8.82908	18.2467	0.00420525	0.0404479
143684	FAM76B	-0.577363	4.1539	18.2372	0.0042108	0.0404766
7699	ZNF140	0.495306	5.09012	18.2181	0.00422196	0.0405591
89891	DYNC2I2	-0.502031	7.5043	18.2116	0.00422576	0.0405655
100128881	VPS9D1-AS1	-0.507166	4.68926	18.2081	0.00422778	0.0405655
6584	SLC22A5	0.575503	5.87464	18.2016	0.00423157	0.0405772
9790	BMS1	-0.440981	7.12342	18.1937	0.00423623	0.0405972
8706	B3GALNT1	-0.644562	7.45955	18.1668	0.00425209	0.0407245
23503	ZFYVE26	0.493508	5.91257	18.1412	0.00426721	0.0408444
3178	HNRNPA1	-0.460432	9.53554	18.1301	0.00427377	0.0408824
27333	GOLIM4	-0.614303	5.29104	18.1143	0.00428317	0.0409474
22868	FASTKD2	-0.406627	6.10096	18.1073	0.00428736	0.0409626
23028	KDM1A	-0.394248	6.82659	18.0816	0.00430272	0.0410845
57186	RALGAPA2	0.584549	6.16807	18.0765	0.00430577	0.0410887
172	AFG3L1P	-0.389643	5.71263	18.0692	0.00431015	0.0411056
7837	PXDN	0.576918	7.02179	18.0206	0.00433951	0.0413606
84795	PYROXD2	0.571207	4.32858	18.0116	0.00434495	0.0413874
51715	RAB23	-0.518803	4.64976	18.0006	0.00435167	0.0414263
79053	ALG8	-0.441784	6.37174	17.9902	0.00435797	0.0414428
9733	SART3	-0.398317	6.5585	17.9891	0.00435866	0.0414428
51116	MRPS2	-0.416066	6.21121	17.9775	0.00436572	0.0414848
65979	PHACTR4	-0.447896	5.58265	17.9684	0.0043713	0.0415045
116983	ACAP3	0.47749	6.29314	17.9655	0.00437306	0.0415045
440288	UBL7-DT	-0.893759	2.8824	17.9409	0.00438814	0.0416147
7461	CLIP2	1.16967	1.99449	17.9248	0.00439808	0.0416147
246329	STAC3	0.907553	2.51361	17.9217	0.00439999	0.0416147
9130	FAM50A	0.401155	6.7852	17.9198	0.00440114	0.0416147
7520	XRCC5	-0.489642	9.15009	17.9189	0.00440172	0.0416147
23786	BCL2L13	0.421006	6.16785	17.9163	0.00440332	0.0416147
3916	LAMP1	0.431966	7.73302	17.9153	0.00440396	0.0416147
8140	SLC7A5	1.44137	8.92058	17.9103	0.00440702	0.0416147
5062	PAK2	0.369698	9.04452	17.907	0.0044091	0.0416147
727957	MROH1	0.421405	5.97024	17.9037	0.00441108	0.0416147
64089	SNX16	0.595014	4.92696	17.8984	0.0044144	0.0416211
23089	PEG10	-1.0374	3.10608	17.8922	0.00441822	0.0416225
56138	PCDHA11	0.598031	4.02264	17.8854	0.00442245	0.0416225
10199	MPHOSPH10	-0.473581	6.12286	17.8829	0.00442404	0.0416225
647024	C6orf132	1.27521	4.87563	17.8811	0.00442512	0.0416225
10598	AHSA1	-0.380272	7.29202	17.8736	0.00442982	0.0416384
3939	LDHA	-0.605399	9.00345	17.8699	0.00443209	0.0416384
65095	KRI1	-0.4687	5.28123	17.857	0.00444013	0.0416665
1027	CDKN1B	-0.465693	6.66529	17.8546	0.00444165	0.0416665
10188	TNK2	0.488872	5.87424	17.8517	0.00444349	0.0416665
100507642	LINC03014	-1.54295	0.566088	17.8482	0.00444566	0.0416665
80351	TNKS2	0.399699	7.0562	17.8415	0.00444982	0.0416699
54956	PARP16	-0.602365	4.05911	17.8391	0.00445132	0.0416699
171568	POLR3H	-0.377238	5.96352	17.8239	0.00446089	0.0417347
5147	PDE6D	-0.740608	4.27562	17.8173	0.00446504	0.0417395
96459	FNIP1	0.775613	5.84082	17.8147	0.0044667	0.0417395
100422832	MIR3191	3.83643	-1.06936	17.8069	0.00447159	0.0417526
57658	CALCOCO1	0.787169	5.59101	17.8021	0.00447459	0.0417526
56952	PRTFDC1	-1.10028	1.88309	17.7998	0.00447605	0.0417526
9782	MATR3	-0.389692	8.99242	17.7884	0.00448328	0.0417953
2274	FHL2	0.789133	3.38047	17.7658	0.0044976	0.0418978
91574	MTRFR	-0.937986	3.59008	17.762	0.00449997	0.0418978
51096	UTP18	-0.576549	6.3944	17.7578	0.00450267	0.0418978
55856	ACOT13	-0.581598	4.70499	17.7543	0.00450491	0.0418978
132299	OCIAD2	0.480908	5.39102	17.7381	0.00451519	0.0419024
6774	STAT3	0.531482	6.91662	17.7345	0.0045175	0.0419024
6653	SORL1	0.634626	4.8827	17.7319	0.00451917	0.0419024
10793	ZNF273	-0.757821	3.55762	17.7318	0.00451927	0.0419024
23518	R3HDM1	-0.423362	6.69893	17.7259	0.004523	0.0419024
29923	HILPDA	0.591101	6.2649	17.7251	0.00452351	0.0419024
100862671	TMEM265	0.566265	4.409	17.7243	0.00452403	0.0419024
10989	IMMT	-0.354437	7.22764	17.7066	0.00453536	0.0419584
55332	DRAM1	0.656641	6.96944	17.7066	0.00453539	0.0419584
4685	NCAM2	-0.374291	8.04613	17.698	0.00454088	0.0419757
112495	GTF3C6	-0.469166	5.62652	17.688	0.00454738	0.0419757
81570	CLPB	-0.508844	4.71274	17.6878	0.00454745	0.0419757
29760	BLNK	1.0342	2.54189	17.6863	0.00454844	0.0419757
79631	EFL1	0.376604	5.86733	17.6825	0.00455091	0.0419757
151194	METTL21A	-0.625711	3.78091	17.6788	0.00455325	0.0419757
6173	RPL36A	-0.788813	3.39359	17.6738	0.00455648	0.0419809
100188893	TOMM6	-0.375548	6.51757	17.6633	0.0045633	0.0420034
388743	CAPN8	1.76849	2.74033	17.6618	0.00456425	0.0420034
5165	PDK3	-0.419502	5.79448	17.6524	0.00457033	0.0420111
2232	FDXR	0.443515	5.08029	17.6523	0.00457042	0.0420111
598	BCL2L1	0.566947	7.05325	17.6395	0.00457873	0.0420243
100506660	DDX11-AS1	-1.60656	0.376178	17.638	0.00457968	0.0420243
57646	USP28	-0.633955	4.62388	17.6378	0.00457986	0.0420243
114915	NA	0.589273	4.64192	17.6207	0.00459098	0.0421018
3297	HSF1	0.428374	6.29071	17.6073	0.00459971	0.0421569
865	CBFB	-0.422366	5.689	17.6033	0.00460234	0.0421569
3675	ITGA3	0.623588	7.17378	17.5889	0.0046118	0.0422051
5432	POLR2C	-0.401277	5.85929	17.5871	0.00461297	0.0422051
4116	MAGOH	-0.659489	4.54432	17.561	0.00463015	0.042336
177	AGER	-0.823582	2.74034	17.5572	0.00463264	0.042336
3625	INHBB	0.796551	7.34934	17.5514	0.00463644	0.0423462
54976	C20orf27	-0.580108	5.80179	17.5276	0.00465222	0.0424657
114788	CSMD3	1.15002	1.59871	17.5229	0.00465538	0.0424699
112770	GLMP	0.617827	5.00498	17.5173	0.00465906	0.0424789
54969	HPF1	-0.745101	3.67345	17.4947	0.00467414	0.0425917
50626	CYHR1	0.450882	5.14472	17.4769	0.00468604	0.0426755
55823	VPS11	0.415031	5.97967	17.464	0.00469472	0.0427298
359948	IRF2BP2	0.903988	7.05789	17.4506	0.00470371	0.0427869
154007	SNRNP48	-0.505825	4.83732	17.4205	0.00472401	0.0429468
84842	HPDL	-0.782158	3.57267	17.4036	0.00473546	0.0430183
10974	ADIRF	1.11968	4.3813	17.4009	0.00473734	0.0430183
80271	ITPKC	0.702363	5.06222	17.3805	0.00475122	0.0431195
8527	DGKD	0.498461	5.83492	17.3664	0.00476085	0.043182
3631	INPP4A	0.460239	6.19681	17.3608	0.00476467	0.0431918
127281	PRXL2B	-0.471386	5.38169	17.3396	0.00477923	0.0432989
5053	PAH	1.34735	0.846196	17.3324	0.00478415	0.0433185
490	ATP2B1	0.384186	8.01405	17.3071	0.00480164	0.0434519
254559	MIR9-3HG	-1.17249	1.86091	17.2932	0.00481126	0.043514
168455	CCDC71L	0.665828	3.87557	17.2568	0.00483661	0.0436789
55119	PRPF38B	-0.377677	6.84619	17.2565	0.00483678	0.0436789
6158	RPL28	0.509461	8.45406	17.2512	0.00484052	0.0436789
283104	SBF2-AS1	-1.01733	1.93944	17.2511	0.00484058	0.0436789
83752	LONP2	0.403368	6.14431	17.2232	0.00486009	0.0438078
9289	ADGRG1	0.521071	7.43299	17.2167	0.00486469	0.0438078
126917	IFFO2	0.879428	4.80402	17.216	0.00486517	0.0438078
9454	HOMER3	0.808826	4.3825	17.2148	0.00486599	0.0438078
2542	SLC37A4	-0.370881	5.89707	17.2095	0.00486976	0.0438117
284266	SIGLEC15	0.974454	2.20446	17.2063	0.00487198	0.0438117
4199	ME1	0.524228	5.83878	17.2008	0.00487586	0.0438216
1907	EDN2	1.89096	1.27815	17.1861	0.00488629	0.0438902
387097	NA	-1.19679	1.42527	17.1743	0.00489466	0.0439403
29945	ANAPC4	-0.452958	5.27068	17.1702	0.00489755	0.0439413
53917	RAB24	0.57916	5.28308	17.1562	0.00490748	0.0440042
5634	PRPS2	-0.667168	5.52728	17.1487	0.00491283	0.0440042
100499405	LINC00987	2.69338	-0.815596	17.1485	0.00491295	0.0440042
11179	ZNF277	0.508756	5.346	17.1367	0.00492136	0.0440546
57523	NYNRIN	1.34971	4.46955	17.1321	0.00492465	0.044059
51805	COQ3	-0.802162	2.76007	17.1057	0.00494361	0.0442035
374395	TMEM179B	0.432466	5.10963	17.0928	0.00495288	0.0442613
84128	WDR75	-0.403237	6.208	17.0832	0.00495978	0.0442978
348262	MCRIP1	0.618971	4.65311	17.0674	0.00497125	0.0443751
11221	DUSP10	0.964794	3.87119	17.0469	0.00498605	0.0444781
11044	TENT4A	-0.477609	5.68765	17.0437	0.00498844	0.0444781
57761	TRIB3	0.542963	5.8708	17.0327	0.00499641	0.044524
54545	MTMR12	-0.382128	6.24183	17.0191	0.00500631	0.0445834
29105	CFAP20	-0.531964	4.39473	17.0158	0.00500874	0.0445834
220441	RNF152	0.741053	3.83224	17.0071	0.00501511	0.0446149
81566	CSRNP2	0.429286	5.8704	16.9906	0.00502719	0.0446972
219844	HYLS1	-0.812485	3.89115	16.9821	0.00503348	0.0447278
79007	DBNDD1	0.378815	7.2929	16.9648	0.00504622	0.0448158
51582	AZIN1	-0.399664	8.6582	16.9438	0.0050617	0.0449106
10713	USP39	-0.357917	6.72014	16.9426	0.0050626	0.0449106
129401	NUP35	-0.661016	4.60376	16.9377	0.00506628	0.0449179
91869	RFT1	-0.512098	4.61685	16.9296	0.00507223	0.0449414
1796	DOK1	-0.761829	3.08249	16.9242	0.0050763	0.0449414
54968	TMEM70	-0.511669	4.5287	16.9165	0.00508204	0.0449414
5928	RBBP4	-0.421215	7.26122	16.9162	0.00508222	0.0449414
5653	KLK6	1.63782	1.87767	16.9126	0.00508491	0.0449414
5143	PDE4C	1.35971	1.00006	16.9111	0.00508604	0.0449414
79174	CRELD2	-0.532703	4.40453	16.9056	0.00509012	0.0449523
165918	RNF168	-0.470699	5.14222	16.8824	0.00510747	0.0450802
64423	INF2	0.349983	7.076	16.8784	0.0051105	0.0450817
29761	USP25	0.412286	5.89785	16.8608	0.00512372	0.0451731
56241	SUSD2	0.798957	4.45387	16.857	0.00512662	0.0451733
9122	SLC16A4	1.41645	0.786061	16.8503	0.00513167	0.0451925
7570	ZNF22	-0.461748	4.88063	16.8451	0.00513554	0.0452014
51477	ISYNA1	0.584684	6.32338	16.8395	0.00513982	0.0452137
10782	ZNF274	0.802615	4.64443	16.8188	0.00515546	0.0453261
51427	ZNF107	-0.592462	6.26262	16.8138	0.00515925	0.0453341
92291	CAPN13	1.07444	4.29368	16.8011	0.00516893	0.0453938
1244	ABCC2	1.16706	1.37157	16.7837	0.00518221	0.0454824
57591	MRTFA	0.475307	4.92006	16.7803	0.00518479	0.0454824
27339	PRPF19	-0.398733	7.43394	16.7738	0.00518975	0.0454831
8666	EIF3G	0.349275	6.79904	16.7727	0.00519064	0.0454831
79991	STN1	0.617198	4.81763	16.7622	0.00519867	0.0455281
118491	CFAP70	1.79575	-0.068815	16.7493	0.00520856	0.0455436
83641	FAM107B	0.360655	6.83278	16.7448	0.00521206	0.0455436
6645	SNTB2	0.373896	6.17887	16.7425	0.00521379	0.0455436
8193	DPF1	-1.23065	1.41484	16.7401	0.00521566	0.0455436
10946	SF3A3	-0.426542	6.47729	16.7395	0.00521613	0.0455436
113612	CYP2U1	-0.769743	2.95271	16.7373	0.00521778	0.0455436
23093	TTLL5	-0.39271	6.12195	16.7085	0.00524009	0.045713
55592	GOLGA2P5	-0.710709	3.3379	16.6946	0.00525089	0.0457577
23012	STK38L	0.690114	6.1553	16.6917	0.00525313	0.0457577
58500	ZNF250	0.590504	4.15953	16.6906	0.00525393	0.0457577
57678	GPAM	-0.549419	4.65742	16.6735	0.00526731	0.0458183
4185	ADAM11	-0.926613	2.39443	16.6722	0.00526831	0.0458183
79085	SLC25A23	-0.368847	6.05939	16.6705	0.00526961	0.0458183
5091	PC	-0.472863	4.82948	16.665	0.00527393	0.0458306
340120	ANKRD34B	0.90765	4.39334	16.6552	0.0052816	0.0458719
348995	NUP43	-0.389065	5.6268	16.6016	0.00532383	0.0462132
26091	HERC4	0.357454	6.33552	16.5965	0.00532782	0.0462223
1478	CSTF2	-0.433569	5.29847	16.5781	0.00534247	0.0463239
23657	SLC7A11	1.63141	4.58902	16.5728	0.00534668	0.046335
7013	TERF1	-0.4734	4.78138	16.5494	0.0053653	0.0464708
7296	TXNRD1	0.587538	8.10443	16.5366	0.00537557	0.0464971
84172	POLR1B	-0.397709	6.19132	16.5346	0.0053772	0.0464971
54539	NDUFB11	-0.362045	6.21075	16.5331	0.00537836	0.0464971
79691	QTRT2	-0.375443	5.82851	16.5284	0.00538214	0.0464971
863	CBFA2T3	0.43915	6.59484	16.5272	0.00538309	0.0464971
54855	TENT5C	0.855471	3.66107	16.5229	0.00538654	0.0465014
79094	CHAC1	1.48934	2.03536	16.5145	0.00539335	0.0465332
11157	LSM6	-0.788721	3.55242	16.51	0.00539692	0.0465332
9550	ATP6V1G1	0.518954	7.92364	16.5044	0.00540144	0.0465332
80019	UBTD1	0.826209	3.30022	16.5012	0.00540404	0.0465332
55131	RBM28	-0.415389	5.36804	16.4992	0.00540568	0.0465332
284252	KCTD1	0.550882	4.39382	16.4944	0.00540955	0.0465332
144404	TMEM120B	0.509484	5.26456	16.4927	0.0054109	0.0465332
3703	STT3A	-0.403628	7.11297	16.4527	0.00544339	0.046765
339804	C2orf74	-0.757619	3.70362	16.4522	0.00544379	0.046765
55151	TMEM38B	-0.499693	5.32085	16.4439	0.00545052	0.0467907
100423020	MIR4258	-5.58752	-1.45034	19.195	0.00545273	0.0467907
284161	GDPD1	0.949765	1.97383	16.4303	0.00546162	0.0468415
146198	ZFP90	0.349826	6.39081	16.4248	0.00546616	0.0468549
51074	APIP	-0.59352	4.49272	16.4189	0.00547101	0.0468622
101928858	LINC02997	1.73243	1.59188	16.4165	0.00547296	0.0468622
119391	GSTO2	-0.515462	4.67876	16.4104	0.00547796	0.0468795
219899	TBCEL	0.509154	4.623	16.3994	0.00548703	0.0469148
25994	HIGD1A	0.375261	6.27585	16.3982	0.00548803	0.0469148
80143	SIKE1	-0.34333	7.79393	16.3908	0.00549411	0.0469413
8556	CDC14A	1.03076	3.133	16.3659	0.00551471	0.047076
25936	NSL1	-0.552441	4.23746	16.3645	0.00551585	0.047076
51035	UBXN1	0.4083	5.98543	16.3542	0.00552442	0.0471236
1181	CLCN2	-0.620215	3.63627	16.347	0.00553036	0.0471265
81603	TRIM8	0.412036	5.93919	16.345	0.00553202	0.0471265
116228	COX20	-0.509683	4.94913	16.3381	0.00553778	0.0471265
80216	ALPK1	-0.903736	2.8245	16.3381	0.0055378	0.0471265
10370	CITED2	0.363583	6.82092	16.3356	0.00553992	0.0471265
57463	AMIGO1	0.642863	3.64434	16.3322	0.00554271	0.0471265
91442	FAAP24	-1.10298	2.05796	16.3249	0.00554878	0.0471486
9270	ITGB1BP1	-0.477078	5.99666	16.3181	0.00555452	0.0471486
124976	SPNS2	1.50453	2.90509	16.3165	0.00555583	0.0471486
257397	TAB3	0.373867	6.39729	16.3119	0.0055597	0.0471486
10973	ASCC3	0.359203	7.24121	16.3112	0.00556028	0.0471486
346389	MACC1	1.4021	4.79735	16.2938	0.0055749	0.0472472
55719	SLF2	-0.352098	6.51041	16.2846	0.00558259	0.0472683
4668	NAGA	-0.455735	4.95139	16.2805	0.00558609	0.0472683
5160	PDHA1	-0.362661	6.75505	16.2801	0.00558639	0.0472683
57060	PCBP4	0.597184	4.09542	16.2749	0.00559078	0.0472801
80304	WDCP	-0.615734	3.70861	16.2227	0.00563506	0.0476289
113178	SCAMP4	0.428445	5.84104	16.2191	0.00563813	0.0476293
79829	NAA40	-0.396675	5.59657	16.2066	0.00564882	0.047694
54108	CHRAC1	-0.380195	5.51731	16.1502	0.00569734	0.0480779
8607	RUVBL1	-0.41703	6.52876	16.1413	0.00570499	0.0481037
102724452	NA	1.72325	0.297178	16.1396	0.00570649	0.0481037
24139	EML2	0.92538	4.73045	16.1295	0.0057152	0.0481514
64061	TSPYL2	0.461025	5.67431	16.1173	0.00572587	0.0482154
64225	ATL2	-0.344727	6.50698	16.1083	0.00573368	0.0482387
79954	NOL10	-0.355926	6.06784	16.1071	0.00573476	0.0482387
5934	RBL2	0.569393	7.56378	16.1035	0.00573786	0.0482391
64101	LRRC4	1.34766	0.846138	16.0957	0.00574465	0.0482569
3623	INHA	0.914492	2.29329	16.093	0.00574706	0.0482569
101927957	LINC01572	-5.80471	-1.31314	18.7469	0.00574985	0.0482569
124935	SLC43A2	0.505423	5.26948	16.0871	0.00575224	0.0482569
84679	SLC9A7	0.624213	6.56795	16.0807	0.00575784	0.0482782
93627	TBCK	0.508585	5.35953	16.0722	0.00576529	0.048315
2563	GABRD	-1.74717	0.29226	16.0658	0.00577085	0.0483214
126536	LINC00661	-3.8186	-1.01762	16.0643	0.0057722	0.0483214
8322	FZD4	-0.91492	4.24598	16.057	0.0057786	0.0483385
762	CA4	0.644681	3.65064	16.0519	0.00578317	0.0483385
3615	IMPDH2	0.340202	7.62647	16.0516	0.00578344	0.0483385
27158	NDOR1	-0.397149	5.52421	16.0377	0.00579566	0.0484149
221092	HNRNPUL2	-0.421762	6.28388	16.029	0.00580333	0.0484534
23650	TRIM29	1.96853	1.56516	16.0252	0.00580671	0.048454
5585	PKN1	0.395704	6.95094	16.022	0.00580955	0.048454
23398	PPWD1	-0.47607	5.13062	16.0155	0.0058153	0.0484762
1795	DOCK3	0.787903	3.47928	16.0093	0.00582086	0.0484969
10362	HMG20B	-0.370779	6.38488	16.0053	0.00582444	0.0485011
55257	MRGBP	-0.381382	6.14759	15.9967	0.00583211	0.0485332
258010	SVIP	-0.442478	4.93337	15.994	0.00583445	0.0485332
10551	AGR2	-0.632324	7.60818	15.9654	0.00586011	0.0487208
158586	ZXDB	0.584006	4.53006	15.9589	0.00586586	0.0487429
4147	MATN2	-0.616452	5.37506	15.953	0.00587116	0.0487613
55668	GPATCH2L	0.370358	6.18632	15.9446	0.00587873	0.0487745
26092	TOR1AIP1	-0.360468	6.80922	15.9444	0.00587894	0.0487745
157378	TMEM65	0.356957	6.10645	15.9327	0.00588946	0.048836
22979	EFR3B	0.633864	5.20349	15.9029	0.00591652	0.0490162
8714	ABCC3	1.8241	6.37061	15.9019	0.00591741	0.0490162
4942	OAT	-0.407523	6.58665	15.8789	0.0059383	0.0491633
23512	SUZ12	-0.398219	6.21879	15.8652	0.00595085	0.0492414
5583	PRKCH	0.40722	5.41204	15.8577	0.00595771	0.0492723
2334	AFF2	-1.51908	0.810832	15.8512	0.00596367	0.0492957
4043	LRPAP1	0.373868	6.81598	15.8465	0.00596798	0.0493054
6633	SNRPD2	-0.348204	6.85623	15.838	0.0059758	0.049306
9448	MAP4K4	0.4333	7.24727	15.8363	0.00597736	0.049306
64397	ZNF106	-0.373074	6.1893	15.8363	0.00597743	0.049306
81929	SEH1L	-0.422788	5.93185	15.8308	0.00598243	0.0493214
4904	YBX1	-0.446011	8.43275	15.824	0.00598877	0.0493479
23351	KHNYN	0.419904	7.27785	15.8168	0.00599533	0.0493761
22864	R3HDM2	0.500998	6.78253	15.807	0.00600446	0.0494254
2239	GPC4	-0.629838	4.02168	15.8025	0.00600862	0.0494339
23118	TAB2	0.37673	7.3263	15.792	0.00601837	0.0494882
653	BMP5	-1.98959	0.133561	15.7866	0.00602334	0.0495033
10654	PMVK	-0.433512	5.25603	15.7784	0.00603098	0.0495402
79778	MICALL2	0.363517	5.89649	15.7701	0.0060387	0.0495778
57154	SMURF1	0.417076	6.57692	15.7641	0.00604437	0.0495984
3276	PRMT1	-0.419626	7.57362	15.7506	0.00605694	0.0496683
23233	EXOC6B	0.519161	6.11278	15.7482	0.00605918	0.0496683
257194	NEGR1	5.51961	-1.52233	18.3025	0.00606671	0.0496745
51668	HSPB11	-0.85472	3.5034	15.7382	0.00606861	0.0496745
201973	PRIMPOL	-1.00024	1.79498	15.7373	0.0060694	0.0496745
151473	SLC16A14	-0.880894	3.84157	15.7314	0.00607499	0.0496944
389677	RBM12B	-0.418701	5.80422	15.7162	0.00608929	0.0497415
8536	CAMK1	-1.07654	1.77235	15.7127	0.00609257	0.0497415
51765	STK26	-0.43533	6.59177	15.7115	0.00609376	0.0497415
4163	MCC	0.519896	4.71767	15.7111	0.00609407	0.0497415
80022	MYO15B	0.776981	4.96781	15.706	0.00609894	0.0497415
3192	HNRNPU	-0.400466	9.40567	15.7052	0.00609968	0.0497415
2941	GSTA4	1.69089	0.973554	15.6769	0.00612653	0.049915
8899	PRPF4B	-0.385717	7.22837	15.6761	0.0061273	0.049915
22900	CARD8	-0.570746	3.9216	15.6594	0.00614317	0.050005
1649	DDIT3	1.04577	4.52966	15.6578	0.0061447	0.050005
50488	MINK1	0.355697	7.27293	15.6541	0.00614824	0.050008
128061	C1orf131	-0.548362	4.28693	15.6396	0.00616214	0.0500952
128853	DUSP15	2.30649	-0.769857	15.6229	0.00617811	0.0501991
118980	SFXN2	-0.640398	5.42578	15.6164	0.00618441	0.050207
79896	THNSL1	-0.42991	5.32664	15.6127	0.00618793	0.050207
1317	SLC31A1	-0.350149	6.34794	15.6107	0.00618989	0.050207
57828	CATSPERG	0.900315	2.84437	15.6087	0.00619183	0.050207
81617	CAB39L	-0.48909	5.00738	15.6032	0.00619714	0.050211
54859	ELP6	-0.594283	4.17891	15.6016	0.0061987	0.050211
51204	TACO1	-0.345134	6.04427	15.5968	0.00620328	0.0502223
283464	GXYLT1	-0.39475	5.61094	15.5853	0.00621446	0.0502782
3093	UBE2K	-0.412927	7.0456	15.5831	0.00621656	0.0502782
58517	RBM25	-0.44353	7.52417	15.5777	0.00622177	0.0502945
64285	RHBDF1	0.370311	7.00272	15.5569	0.00624202	0.0504324
8086	AAAS	-0.406413	5.76423	15.5517	0.00624713	0.0504477
81553	CYRIA	0.827739	3.02753	15.5412	0.00625731	0.050504
51171	HSD17B14	1.55587	0.640881	15.5359	0.00626251	0.0505087
253832	ZDHHC20	-0.330747	8.20439	15.5341	0.0062643	0.0505087
3633	INPP5B	-0.690689	3.62285	15.5105	0.00628743	0.0506693
283987	HID1	0.509296	7.8896	15.4943	0.00630335	0.0507484
5376	PMP22	0.523569	7.99954	15.494	0.00630369	0.0507484
5782	PTPN12	0.38461	7.53212	15.4763	0.00632119	0.0508633
51192	CKLF	-1.13743	1.48248	15.4524	0.00634494	0.0510284
8847	DLEU2	-1.04144	1.53842	15.4374	0.00635985	0.0510794
79713	IGFLR1	-1.27945	0.869852	15.4323	0.00636491	0.0510794
27343	POLL	0.598754	4.61282	15.4288	0.00636849	0.0510794
55020	TTC38	-0.716593	3.60407	15.4273	0.00636999	0.0510794
4145	MATK	-0.830487	2.88299	15.4255	0.00637179	0.0510794
63976	PRDM16	-0.885963	2.49638	15.4242	0.00637308	0.0510794
23349	PHF24	3.65912	-1.18509	15.4233	0.00637399	0.0510794
3981	LIG4	0.430681	4.95417	15.4135	0.00638383	0.0511105
56997	COQ8A	-0.622112	4.13471	15.4076	0.00638975	0.0511105
23521	RPL13A	0.335112	10.168	15.4065	0.00639079	0.0511105
5937	RBMS1	0.510413	6.2424	15.4052	0.00639213	0.0511105
284695	ZNF326	-0.424712	5.04853	15.4032	0.00639409	0.0511105
114826	SMYD4	-0.628499	4.28635	15.3957	0.00640166	0.0511435
51071	DERA	-0.743032	3.9015	15.39	0.00640738	0.0511435
90678	LRSAM1	0.397638	5.58565	15.3895	0.00640795	0.0511435
51523	CXXC5	0.457843	7.87434	15.3802	0.00641735	0.0511925
283149	BCL9L	0.352078	8.43408	15.3724	0.00642517	0.0512076
64760	FHIP2B	0.414408	5.89851	15.3719	0.00642573	0.0512076
9805	SCRN1	0.332874	8.6296	15.3613	0.00643647	0.0512426
23015	GOLGA8A	0.470286	4.84533	15.3611	0.00643662	0.0512426
222171	PRR15	0.650405	3.48076	15.3502	0.00644766	0.0513045
22824	HSPA4L	0.577468	4.88135	15.3451	0.00645284	0.0513198
8870	IER3	-0.551335	6.93488	15.3385	0.00645966	0.0513481
4598	MVK	-0.572073	4.94307	15.3118	0.00648686	0.0514849
28973	MRPS18B	-0.341377	6.1825	15.3113	0.00648735	0.0514849
23246	BOP1	-0.392178	5.60814	15.3075	0.00649125	0.0514849
84707	BEX2	0.856519	3.12196	15.3054	0.00649346	0.0514849
84693	MCEE	-0.844034	3.12551	15.3031	0.00649583	0.0514849
10440	TIMM17A	-0.369244	5.79188	15.3025	0.00649647	0.0514849
51522	TMEM14C	-0.38044	6.3642	15.2887	0.00651058	0.0515708
114796	PSMG3-AS1	0.498955	5.50983	15.2813	0.00651828	0.0516058
347731	LRRTM3	2.33	-0.309923	15.257	0.00654331	0.051778
200734	SPRED2	0.356832	5.88731	15.2433	0.00655753	0.0518546
163227	ZNF100	-0.656241	3.92349	15.2396	0.0065614	0.0518546
29107	NXT1	-0.675295	4.22085	15.2382	0.00656287	0.0518546
81858	SHARPIN	0.503752	4.77889	15.2301	0.00657132	0.0518954
55224	ETNK2	0.718559	3.95685	15.219	0.0065829	0.0519608
79042	TSEN34	-0.350518	6.01064	15.2032	0.00659944	0.0520651
10301	DLEU1	-0.859857	3.29856	15.1958	0.00660718	0.0520918
22994	CEP131	-0.546725	4.30283	15.1936	0.00660943	0.0520918
[truncated: 13,763 more rows]
