# Supplementary material for: G4-DNA formation and chromatin remodelling are interdependent in human cells
Source: Chem Sci. 2023 Jun 27;14(28):7681–7. doi: 10.1039/d3sc02533k (PMC10355101; doi:10.1039/d3sc02533k)
Supplement: SC-014-D3SC02533K-s004 [file SC-014-D3SC02533K-s004.xlsx]

## Sheet: GQC-05
Pathway	pval	padj	ES	NES	size
Homologous DNA Pairing and Strand Exchange	0.00021348	0.017768	-0.799272	-1.82514	42
HDR through Homologous Recombination (HRR)	0.0001956	0.017768	-0.741102	-1.81912	65
Activation of ATR in response to replication stress	0.00021264	0.017768	-0.809171	-1.80868	37
Presynaptic phase of homologous DNA pairing and strand exchange	0.00031936	0.0236357	-0.796647	-1.79759	39
Extension of Telomeres	0.00034382	0.0236357	-0.761908	-1.79167	50
DNA strand elongation	0.00038068	0.0236357	-0.821372	-1.78773	32
Diseases of DNA repair	0.00055031	0.0270653	-0.805601	-1.77412	34
Processing of Capped Intron-Containing Pre-mRNA	2.35e-05	0.00869621	-0.612167	-1.77174	235
Activation of the pre-replicative complex	0.0008248	0.0326644	-0.804824	-1.75172	32
Homology Directed Repair	0.00020208	0.017768	-0.651003	-1.74925	122
HDR through Homologous Recombination (HRR) or Single Strand Annealing (SSA)	0.00017938	0.017768	-0.651184	-1.73855	116
Resolution of D-Loop Structures	0.00124778	0.0435515	-0.795238	-1.73085	32
Resolution of D-loop Structures through Synthesis-Dependent Strand Annealing (SDSA)	0.00113627	0.0409814	-0.826002	-1.72879	26
DNA Double-Strand Break Repair	0.00015861	0.017768	-0.627471	-1.72797	149
Transport of Mature Transcript to Cytoplasm	0.00046173	0.0249797	-0.682559	-1.72657	79
Transport of Mature mRNA derived from an Intron-Containing Transcript	0.00076413	0.0326644	-0.692976	-1.72125	70
HDR through Single Strand Annealing (SSA)	0.0012971	0.0438582	-0.769781	-1.72064	37
mRNA Splicing	9.22e-05	0.0166229	-0.604992	-1.70914	186
mRNA Splicing - Major Pathway	6.89e-05	0.0149091	-0.605274	-1.70135	178
DNA Repair	2.41e-05	0.00869621	-0.572491	-1.70037	308
G2/M Checkpoints	0.00036238	0.0236357	-0.603499	-1.66536	151
Cell Cycle Checkpoints	4.78e-05	0.0129175	-0.557757	-1.63637	272
Chromosome Maintenance	0.00087548	0.0326644	-0.609865	-1.63502	120
Synthesis of DNA	0.00087385	0.0326644	-0.609983	-1.63223	118
Cytokine Signaling in Immune system	0.0006241	0.0293597	0.469371	1.40542	490
Neutrophil degranulation	0.0008616	0.0326644	0.496434	1.44734	347
Hemostasis	0.00015006	0.017768	0.501392	1.48315	415
Signaling by Receptor Tyrosine Kinases	1.67e-05	0.00869621	0.526888	1.55822	414
SARS-CoV Infections	0.00082358	0.0326644	0.594689	1.58257	139
Interleukin-2 family signaling	0.00147003	0.0481991	0.829687	1.69926	25
FOXO-mediated transcription	0.0003932	0.0236357	0.759078	1.74585	49
Formation of the cornified envelope	0.00052667	0.0270653	0.78352	1.74943	41
Keratinization	0.00045087	0.0249797	0.779993	1.75655	43

## Sheet: GTC365
Pathway	pval	padj	ES	NES	size
Cell Cycle, Mitotic	1.03919e-05	0.000216328	-0.835067	-2.17293	494
Mitotic Prometaphase	1.17408e-05	0.000216328	-0.865	-2.13005	180
Mitotic Metaphase and Anaphase	1.15428e-05	0.000216328	-0.849557	-2.1102	203
Cell Cycle Checkpoints	1.11643e-05	0.000216328	-0.835367	-2.10775	256
Mitotic Anaphase	1.15479e-05	0.000216328	-0.848344	-2.10669	202
Mitotic Spindle Checkpoint	1.28942e-05	0.000216328	-0.892275	-2.07824	100
Resolution of Sister Chromatid Cohesion	1.27351e-05	0.000216328	-0.884708	-2.07728	108
M Phase	1.0732e-05	0.000216328	-0.807891	-2.07478	356
Separation of Sister Chromatids	1.19397e-05	0.000216328	-0.849521	-2.07292	161
Amplification of signal from unattached kinetochores via a MAD2 inhibitory signal	1.32188e-05	0.000216328	-0.902387	-2.06464	85
Amplification of signal from the kinetochores	1.32188e-05	0.000216328	-0.902387	-2.06464	85
EML4 and NUDC in mitotic spindle formation	1.29106e-05	0.000216328	-0.88629	-2.06243	99
Synthesis of DNA	1.27351e-05	0.000216328	-0.876243	-2.05741	108
RHO GTPases Activate Formins	1.24933e-05	0.000216328	-0.861735	-2.04817	122
Mitotic G1 phase and G1/S transition	1.22734e-05	0.000216328	-0.844077	-2.02845	136
S Phase	1.21036e-05	0.000216328	-0.831405	-2.01443	149
G1/S Transition	1.2536e-05	0.000216328	-0.844142	-2.00182	119
DNA Replication	1.20194e-05	0.000216328	-0.817908	-1.98833	154
G2/M Checkpoints	1.21794e-05	0.000216328	-0.8225	-1.98523	143
DNA Repair	1.09829e-05	0.000216328	-0.770073	-1.95797	293
Chromosome Maintenance	1.25712e-05	0.000216328	-0.818589	-1.93789	117
COPI-dependent Golgi-to-ER retrograde traffic	1.32972e-05	0.000216328	-0.843551	-1.92253	82
HDR through Homologous Recombination (HRR)	1.39678e-05	0.000216328	-0.874878	-1.91782	60
Homology Directed Repair	1.2536e-05	0.000216328	-0.807265	-1.91437	119
RHO GTPase Effectors	1.10913e-05	0.000216328	-0.755568	-1.91251	270
Golgi-to-ER retrograde transport	1.26622e-05	0.000216328	-0.807723	-1.90322	112
Regulation of TP53 Activity through Phosphorylation	1.32972e-05	0.000216328	-0.832611	-1.8976	82
HDR through Homologous Recombination (HRR) or Single Strand Annealing (SSA)	1.2618e-05	0.000216328	-0.80331	-1.8965	114
APC/C-mediated degradation of cell cycle proteins	1.34521e-05	0.000216328	-0.838099	-1.89315	76
Regulation of mitotic cell cycle	1.34521e-05	0.000216328	-0.838099	-1.89315	76
Activation of ATR in response to replication stress	1.52151e-05	0.000216328	-0.932331	-1.89163	35
Switching of origins to a post-replicative state	1.3371e-05	0.000216328	-0.833119	-1.89087	79
Activation of the pre-replicative complex	1.55063e-05	0.000216328	-0.947813	-1.88688	31
DNA Double-Strand Break Repair	1.21361e-05	0.000216328	-0.779021	-1.88418	146
Mitotic G2-G2/M phases	1.18062e-05	0.000216328	-0.765722	-1.88018	174
G2/M Transition	1.18332e-05	0.000216328	-0.762717	-1.87052	172
Regulation of TP53 Activity	1.21281e-05	0.000216328	-0.77047	-1.86436	147
Fanconi Anemia Pathway	1.52784e-05	0.000216328	-0.921573	-1.86202	34
DNA strand elongation	1.55063e-05	0.000216328	-0.933448	-1.85828	31
Processing of Capped Intron-Containing Pre-mRNA	1.15479e-05	0.000216328	-0.747908	-1.85728	202
DNA Replication Pre-Initiation	1.23968e-05	0.000216328	-0.776273	-1.8538	128
Homologous DNA Pairing and Strand Exchange	1.49367e-05	0.000216328	-0.898616	-1.85308	39
Extension of Telomeres	1.44005e-05	0.000216328	-0.867719	-1.85071	49
Orc1 removal from chromatin	1.39678e-05	0.000216328	-0.839664	-1.84063	60
Regulation of PLK1 Activity at G2/M Transition	1.32972e-05	0.000216328	-0.807109	-1.83948	82
Kinesins	1.45427e-05	0.000216328	-0.870139	-1.83928	46
AURKA Activation by TPX2	1.36612e-05	0.000216328	-0.824673	-1.83825	68
Presynaptic phase of homologous DNA pairing and strand exchange	1.51494e-05	0.000216328	-0.897724	-1.82909	36
Intra-Golgi and retrograde Golgi-to-ER traffic	1.18332e-05	0.000216328	-0.742684	-1.82139	172
SUMOylation of DNA replication proteins	1.47473e-05	0.000216328	-0.871235	-1.81772	42
DNA Damage Bypass	1.46383e-05	0.000216328	-0.865263	-1.81739	44
HDR through Single Strand Annealing (SSA)	1.52151e-05	0.000216328	-0.894895	-1.81568	35
Activation of APC/C and APC/C:Cdc20 mediated degradation of mitotic proteins	1.37806e-05	0.000216328	-0.818028	-1.81234	65
Resolution of Abasic Sites (AP sites)	1.49999e-05	0.000216328	-0.878948	-1.80553	38
mRNA Splicing	1.19624e-05	0.000216328	-0.74018	-1.8037	158
Anchoring of the basal body to the plasma membrane	1.30598e-05	0.000216328	-0.780436	-1.80086	92
Regulation of APC/C activators between G1/S and early anaphase	1.3634e-05	0.000216328	-0.80625	-1.80067	69
Processing of DNA double-strand break ends	1.32436e-05	0.000216328	-0.787131	-1.79906	84
mRNA Splicing - Major Pathway	1.20512e-05	0.000216328	-0.738664	-1.79348	152
Centrosome maturation	1.34521e-05	0.000216328	-0.793196	-1.79172	76
Recruitment of mitotic centrosome proteins and complexes	1.34521e-05	0.000216328	-0.793196	-1.79172	76
Cyclin A/B1/B2 associated events during G2/M transition	1.61439e-05	0.000216328	-0.936905	-1.79003	24
G1/S-Specific Transcription	1.58725e-05	0.000216328	-0.916189	-1.7833	27
Transcriptional Regulation by E2F6	1.54247e-05	0.000216328	-0.890507	-1.78183	32
APC/C:Cdc20 mediated degradation of mitotic proteins	1.38053e-05	0.000216328	-0.803814	-1.77785	64
Loss of Nlp from mitotic centrosomes	1.37806e-05	0.000216328	-0.801218	-1.7751	65
Loss of proteins required for interphase microtubule organization from the centrosome	1.37806e-05	0.000216328	-0.801218	-1.7751	65
Diseases of DNA repair	1.55063e-05	0.000216328	-0.889074	-1.76995	31
Recruitment of NuMA to mitotic centrosomes	1.32972e-05	0.000216328	-0.776485	-1.76968	82
G2/M DNA damage checkpoint	1.33259e-05	0.000216328	-0.775203	-1.7639	81
SUMOylation of DNA damage response and repair proteins	1.3604e-05	0.000216328	-0.788305	-1.76347	70
Translesion synthesis by Y family DNA polymerases bypasses lesions on DNA template	3.02989e-05	0.00039293	-0.864903	-1.76221	36
Nuclear Envelope Breakdown	2.89775e-05	0.000383505	-0.83039	-1.76101	47
Telomere Maintenance	1.30598e-05	0.000216328	-0.761609	-1.75742	92
Transport of Mature Transcript to Cytoplasm	1.35775e-05	0.000216328	-0.782822	-1.75409	71
Telomere C-strand (Lagging Strand) Synthesis	3.07286e-05	0.00039293	-0.871825	-1.75249	33
Factors involved in megakaryocyte development and platelet production	1.24536e-05	0.000216328	-0.736028	-1.75236	124
Global Genome Nucleotide Excision Repair (GG-NER)	1.3371e-05	0.000216328	-0.770782	-1.74939	79
Transport of Mature mRNA derived from an Intron-Containing Transcript	1.3887e-05	0.000216328	-0.793432	-1.74734	62
G0 and Early G1	1.59632e-05	0.000216328	-0.901544	-1.74417	26
APC:Cdc20 mediated degradation of cell cycle proteins prior to satisfation of the cell cycle checkpoint	4.16609e-05	0.000486961	-0.78969	-1.7391	62
Termination of translesion DNA synthesis	3.11551e-05	0.00039293	-0.877819	-1.73861	30
Resolution of D-Loop Structures	3.13381e-05	0.00039293	-0.882371	-1.73722	29
Recognition of DNA damage by PCNA-containing replication complex	3.15224e-05	0.00039293	-0.887124	-1.73674	28
APC/C:Cdh1 mediated degradation of Cdc20 and other APC/C:Cdh1 targeted proteins in late mitosis/early G1	4.16609e-05	0.000486961	-0.788018	-1.73542	62
Nuclear Envelope (NE) Reassembly	4.16609e-05	0.000486961	-0.787313	-1.73386	62
Resolution of D-loop Structures through Holliday Junction Intermediates	4.72836e-05	0.000545032	-0.885267	-1.73311	28
Resolution of AP sites via the multiple-nucleotide patch replacement pathway	1.60609e-05	0.000216328	-0.900768	-1.7316	25
E2F mediated regulation of DNA replication	4.93713e-05	0.000563043	-0.923787	-1.72834	21
Cdc20:Phospho-APC/C mediated degradation of Cyclin A	4.17915e-05	0.000486961	-0.785779	-1.72647	61
Metabolism of non-coding RNA	7.22878e-05	0.000807213	-0.811093	-1.72481	48
snRNP Assembly	7.22878e-05	0.000807213	-0.811093	-1.72481	48
Transcription-Coupled Nucleotide Excision Repair (TC-NER)	4.06025e-05	0.000486961	-0.766919	-1.7238	73
Deposition of new CENPA-containing nucleosomes at the centromere	9.90926e-05	0.00106227	-0.794747	-1.72181	55
Nucleosome assembly	9.90926e-05	0.00106227	-0.794747	-1.72181	55
Dual Incision in GG-NER	7.46837e-05	0.000825371	-0.833725	-1.71926	39
Gap-filling DNA repair synthesis and ligation in TC-NER	0.000139958	0.00138921	-0.782426	-1.71177	59
Resolution of D-loop Structures through Synthesis-Dependent Strand Annealing (SDSA)	0.000113007	0.00119944	-0.893809	-1.70769	24
Nuclear Pore Complex (NPC) Disassembly	0.000200521	0.00186921	-0.851136	-1.70305	32
Dual incision in TC-NER	8.38071e-05	0.000916747	-0.775933	-1.70093	60
Lagging Strand Synthesis	0.00011585	0.00120574	-0.91481	-1.69831	20
Gap-filling DNA repair synthesis and ligation in GG-NER	0.00020987	0.00193949	-0.886818	-1.69434	24
Mitotic Prophase	1.25881e-05	0.000216328	-0.71611	-1.69342	116
Cilium Assembly	1.18062e-05	0.000216328	-0.689659	-1.69341	174
CDK-mediated phosphorylation and removal of Cdc6	0.000153235	0.0014848	-0.769294	-1.69025	61
RNA Polymerase II Transcription Termination	0.000238566	0.00206244	-0.772842	-1.68661	58
Defective HDR through Homologous Recombination (HRR) due to BRCA1 loss-of-function	0.000228926	0.0019952	-0.894221	-1.68435	22
Defective HDR through Homologous Recombination (HRR) due to PALB2 loss of function	0.000228926	0.0019952	-0.894221	-1.68435	22
Defective HDR through Homologous Recombination Repair (HRR) due to PALB2 loss of BRCA1 binding function	0.000228926	0.0019952	-0.894221	-1.68435	22
Defective HDR through Homologous Recombination Repair (HRR) due to PALB2 loss of BRCA2/RAD51/RAD51C binding function	0.000228926	0.0019952	-0.894221	-1.68435	22
Diseases of DNA Double-Strand Break Repair	0.000228926	0.0019952	-0.894221	-1.68435	22
Regulation of HSF1-mediated heat shock response	0.000223486	0.0019952	-0.768266	-1.68412	60
tRNA processing	0.000129309	0.00129551	-0.723518	-1.68163	98
PCNA-Dependent Long Patch Base Excision Repair	0.0002648	0.0022529	-0.901824	-1.6742	20
Polo-like kinase mediated events	0.000153744	0.0014848	-0.933224	-1.6703	16
Base Excision Repair	0.000162142	0.00155193	-0.741522	-1.66948	74
Nucleotide Excision Repair	0.000115608	0.00120574	-0.715028	-1.66916	102
Meiosis	0.000262743	0.0022529	-0.725431	-1.66669	88
APC-Cdc20 mediated degradation of Nek2A	0.000503852	0.00409189	-0.876989	-1.66395	23
Vpr-mediated nuclear import of PICs	0.000799123	0.00587223	-0.84143	-1.65661	29
SUMOylation of RNA binding proteins	0.000799763	0.00587223	-0.795866	-1.65406	41
Transport of Mature mRNAs Derived from Intronless Transcripts	0.000806584	0.00588203	-0.80199	-1.65382	39
Interactions of Rev with host cellular proteins	0.000783579	0.00587223	-0.822346	-1.65303	33
Transport of the SLBP Dependant Mature mRNA	0.000863784	0.00620582	-0.825961	-1.65268	32
Rev-mediated nuclear export of HIV RNA	0.000868352	0.00620582	-0.829621	-1.65159	31
tRNA processing in the nucleus	0.000758823	0.00581042	-0.770182	-1.65148	51
TP53 Regulates Transcription of DNA Repair Genes	0.000677507	0.00526295	-0.758818	-1.64791	56
Export of Viral Ribonucleoproteins from Nucleus	0.000996962	0.00698525	-0.831218	-1.64631	30
APC/C:Cdc20 mediated degradation of Securin	0.000719851	0.00555166	-0.75696	-1.64388	56
Initiation of Nuclear Envelope (NE) Reformation	0.000650434	0.00516492	-0.893038	-1.64371	19
Interactions of Vpr with host cellular proteins	0.00120313	0.00821499	-0.821013	-1.64278	32
Transport of Mature mRNA Derived from an Intronless Transcript	0.00127499	0.00844164	-0.797817	-1.63887	38
Transport of the SLBP independent Mature mRNA	0.00136455	0.00891951	-0.823107	-1.63862	31
Polymerase switching on the C-strand of the telomere	0.00134912	0.00887271	-0.850072	-1.63415	25
Assembly of the pre-replicative complex	0.000316556	0.00265116	-0.693126	-1.6332	112
MHC class II antigen presentation	0.000482292	0.0039467	-0.706916	-1.63315	93
Transport of Ribonucleoproteins into the Host Nucleus	0.00149202	0.00969358	-0.838653	-1.63238	27
Nuclear import of Rev protein	0.00174468	0.0108738	-0.823046	-1.63012	30
SUMOylation of SUMOylation proteins	0.00174468	0.0108738	-0.82302	-1.63007	30
HIV Life Cycle	0.000149313	0.00146847	-0.683967	-1.62947	125
NEP/NS2 Interacts with the Cellular Export Machinery	0.0016234	0.0103066	-0.831587	-1.62802	28
Translesion synthesis by POLI	0.000785801	0.00587223	-0.90875	-1.6265	16
Translesion Synthesis by POLH	0.000862871	0.00620582	-0.899216	-1.62606	17
APC/C:Cdc20 mediated degradation of Cyclin B	0.00157988	0.0102026	-0.868989	-1.62581	21
RHOF GTPase cycle	0.00178499	0.0110608	-0.791254	-1.62539	38
Processive synthesis on the lagging strand	0.000792093	0.00587223	-0.915659	-1.62201	15
SUMOylation	0.000118963	0.00120814	-0.661121	-1.61654	165
mRNA 3'-end processing	0.00182275	0.0112298	-0.755409	-1.61556	50
RHOA GTPase cycle	0.000197743	0.00185948	-0.675218	-1.61501	130
Reproduction	0.000631818	0.00505454	-0.693312	-1.61482	100
Translesion synthesis by POLK	0.00124703	0.00835511	-0.901327	-1.61321	16
Translesion synthesis by REV1	0.00110204	0.00762187	-0.908771	-1.60981	15
Cellular response to heat stress	0.000950265	0.00670187	-0.710099	-1.60973	78
mRNA Splicing - Minor Pathway	0.00226287	0.0136002	-0.762974	-1.60735	45
SUMO E3 ligases SUMOylate target proteins	0.000119461	0.00120814	-0.658392	-1.60584	160
Viral Messenger RNA Synthesis	0.00265499	0.0156382	-0.781247	-1.60483	38
Phosphorylation of the APC/C	0.00227093	0.0136002	-0.876906	-1.59928	18
Inactivation of APC/C via direct inhibition of the APC/C complex	0.00295197	0.0168325	-0.867845	-1.59734	19
Inhibition of the proteolytic activity of APC/C required for the onset of anaphase by mitotic spindle checkpoint components	0.00295197	0.0168325	-0.867845	-1.59734	19
Defective TPR may confer susceptibility towards thyroid papillary carcinoma (TPC)	0.00357132	0.0198365	-0.819222	-1.59456	27
Regulation of Glucokinase by Glucokinase Regulatory Protein	0.00357132	0.0198365	-0.819222	-1.59456	27
Late Phase of HIV Life Cycle	0.000668129	0.00522799	-0.672398	-1.5887	115
Postmitotic nuclear pore complex (NPC) reformation	0.00429427	0.023133	-0.830764	-1.58724	24
RHOC GTPase cycle	0.0020451	0.0124565	-0.710299	-1.58638	69
NS1 Mediated Effects on Host Pathways	0.00418125	0.0227477	-0.778503	-1.58618	36
Transcription of E2F targets under negative control by DREAM complex	0.00368395	0.0203567	-0.86864	-1.58421	18
HIV Infection	0.000174496	0.00165539	-0.639465	-1.58224	192
Host Interactions of HIV factors	0.0011699	0.00803933	-0.669645	-1.57382	109
RHOB GTPase cycle	0.00302405	0.017062	-0.707749	-1.57117	66
Transcription of E2F targets under negative control by p107 (RBL1) and p130 (RBL2) in complex with HDAC1	0.00420154	0.0227477	-0.883682	-1.56537	15
Processive synthesis on the C-strand of the telomere	0.00703803	0.0350919	-0.847884	-1.5606	19
Telomere Extension By Telomerase	0.00745646	0.0364992	-0.826432	-1.55666	22
SCF-beta-TrCP mediated degradation of Emi1	0.00681782	0.0343131	-0.736374	-1.55131	45
RHOD GTPase cycle	0.00675168	0.0341406	-0.726577	-1.54508	48
Meiotic recombination	0.00584641	0.0302771	-0.697938	-1.53704	62
TP53 Regulates Transcription of Cell Cycle Genes	0.00941242	0.0441183	-0.729519	-1.53228	44
Autodegradation of Cdh1 by Cdh1:APC/C	0.00763977	0.0372265	-0.708701	-1.5313	54
ISG15 antiviral mechanism	0.00670462	0.0340906	-0.693018	-1.52926	63
Organelle biogenesis and maintenance	0.000222844	0.0019952	-0.604824	-1.52754	261
Mitochondrial translation elongation	0.00488517	0.0260542	-0.673698	-1.52721	78
Condensation of Prophase Chromosomes	0.00844918	0.0407997	-0.706532	-1.52662	54
Mitochondrial translation termination	0.00540714	0.028414	-0.671479	-1.52218	78
Mitochondrial translation	0.00533718	0.0281845	-0.664248	-1.5182	84
Mitochondrial translation initiation	0.00730767	0.0361006	-0.662754	-1.5024	78
Transcriptional Regulation by TP53	0.00011933	0.00120814	-0.587613	-1.50202	323
Antiviral mechanism by IFN-stimulated genes	0.0100338	0.0465638	-0.6659	-1.4921	71
Deubiquitination	0.00450091	0.0241249	-0.561721	-1.41195	241
Nervous system development	0.0101243	0.046781	0.372286	1.2069	460
Axon guidance	0.00671	0.0340906	0.381483	1.23237	438
Transport of small molecules	0.000791975	0.00587223	0.402211	1.3101	493
Neuronal System	0.00814038	0.0394864	0.426703	1.3124	243
SLC-mediated transmembrane transport	0.00646526	0.0331615	0.482346	1.41222	156
Signaling by Receptor Tyrosine Kinases	0.000385356	0.00317771	0.438624	1.41249	416
Extracellular matrix organization	0.00297105	0.0168517	0.480319	1.43621	185
Rab regulation of trafficking	0.00898844	0.0430161	0.514651	1.44693	112
Signaling by NTRK1 (TRKA)	0.00392624	0.0214741	0.560875	1.54582	98
Amino acids regulate mTORC1	0.00928474	0.0439088	0.63109	1.55891	51
Cellular response to starvation	0.00108606	0.00756009	0.546581	1.56309	128
Synthesis of PIPs at the plasma membrane	0.00942452	0.0441183	0.64358	1.56614	47
EPHA-mediated growth cone collapse	0.0104663	0.048154	0.736779	1.59841	26
Constitutive Signaling by AKT1 E17K in Cancer	0.0100162	0.0465638	0.743104	1.59844	25
Degradation of the extracellular matrix	0.00241955	0.0144098	0.59719	1.6025	82
Neurotransmitter release cycle	0.00723589	0.0359115	0.70158	1.6048	34
Collagen chain trimerization	0.00909292	0.0433227	0.723899	1.60493	29
Signaling by FLT3 ITD and TKD mutants	0.00744133	0.0364992	0.830242	1.60541	15
Interleukin-6 family signaling	0.00929786	0.0439088	0.782451	1.6067	20
MET activates PTK2 signaling	0.00863828	0.0415257	0.747847	1.60864	25
Signaling by FLT3 fusion proteins	0.00700284	0.0350796	0.805338	1.6193	18
MET promotes cell motility	0.00523637	0.0277891	0.703324	1.6274	36
Signaling by NTRKs	0.000665811	0.00522799	0.579511	1.62928	112
RHO GTPases Activate ROCKs	0.00544939	0.0284963	0.813638	1.63599	18
NCAM1 interactions	0.00605429	0.0312029	0.727587	1.63607	31
Sema4D in semaphorin signaling	0.00563988	0.0293493	0.775139	1.63848	23
Non-integrin membrane-ECM interactions	0.00389398	0.0214069	0.669312	1.64184	49
PI3K/AKT Signaling in Cancer	0.00218917	0.0132587	0.632037	1.65137	70
EPH-Ephrin signaling	0.00121951	0.00827416	0.61716	1.65832	83
Sema4D induced cell migration and growth-cone collapse	0.00339643	0.0190627	0.81718	1.66109	19
Interferon gamma signaling	0.0012757	0.00844164	0.646835	1.66963	65
Interleukin-10 signaling	0.00276168	0.0160028	0.830496	1.66988	18
Sensory processing of sound by inner hair cells of the cochlea	0.00275297	0.0160028	0.689415	1.67148	46
Semaphorin interactions	0.00198309	0.0121479	0.660958	1.67158	58
Heme signaling	0.00278341	0.016042	0.711697	1.67208	39
Sensory processing of sound by outer hair cells of the cochlea	0.00274946	0.0160028	0.739069	1.68148	33
Formation of the cornified envelope	0.00259352	0.0153605	0.713383	1.68407	40
NCAM signaling for neurite out-growth	0.00162483	0.0103066	0.687616	1.69855	51
Signaling by PDGF	0.00165053	0.0104081	0.709156	1.71261	45
Collagen degradation	0.00158992	0.010206	0.733734	1.7149	38
Sensory processing of sound	0.00124346	0.00835511	0.704884	1.7291	49
Signaling by MET	0.00060391	0.00486761	0.662199	1.73017	70
Keratinization	0.000883615	0.00627308	0.727023	1.74681	44
TP53 Regulates Metabolic Genes	0.00027072	0.00228513	0.667953	1.76604	75
FOXO-mediated transcription	0.000369313	0.00306902	0.712337	1.77298	53
Cell surface interactions at the vascular wall	4.13172e-05	0.000486961	0.715967	1.9346	86
